# Supplementary material for: Tandem vinyl radical Minisci-type annulation on pyridines: one-pot expeditious access to azaindenones
Source: Royal Society of Chemistry journal article supplement (doi:10.1039/d1cc06204b), 2021-01-01

## Supporting Information

# **Tandem Vinyl Radical Minisci-type Annulation on Pyridines: One-Pot Expeditious Access to Azaindenones**

Dong Xia, Xin-Fang Duan\*

College of Chemistry, Beijing Normal University, Beijing, 100875, China

xinfangduan@vip.163.com

## Table of content

|                                                                                       |    |
|---------------------------------------------------------------------------------------|----|
| 1. General experimental details                                                       | 3  |
| 2. Preparations of Substrates                                                         | 3  |
| 2.1 Typical procedures for the synthesis of <b>1t</b>                                 | 3  |
| 2.2 Typical procedures for the synthesis of <b>1u</b>                                 | 5  |
| 3. Optimization of Reaction Conditions                                                | 7  |
| 4. Typical procedure for vinyl radical cascade annulation ( <b>3a</b> )               | 9  |
| 5. Procedures for Gram-Scale Synthesis of <b>11</b>                                   | 9  |
| 6. Mechanistic investigation                                                          | 10 |
| 6.1 Scheme S1 Control experiments                                                     | 10 |
| 6.2 Trapping of cyclohexyl radical                                                    |    |
| 6.2.1 Trapping by TEMPO                                                               | 11 |
| 6.2.2 Trapping by 1,1-diphenylethylene                                                |    |
| 6.3 Isotope labeling experiments                                                      | 14 |
| 7. X-ray single crystal structure and data of <b>3t</b>                               | 15 |
| 8. Characterization data for new compounds (substrates and products)                  | 17 |
| 9. References                                                                         | 43 |
| 10. <sup>1</sup> H, <sup>13</sup> C NMR, HRMS spectra for new substrates and products | 44 |

## 1. General experimental details

Solvents and reagents were reagent grade and used without purification unless otherwise noted.  $^1\text{H}$ NMR (400 or 600 MHz) and  $^{13}\text{C}$ NMR (100 or 150 MHz) spectra were recorded on JNM-ECE 400R or 600R spectrometers unless otherwise noted. The chemical shifts ( $\delta$ ) were quoted in parts per million from tetramethylsilane for  $^1\text{H}$  and  $\text{CDCl}_3$  for  $^{13}\text{C}$  spectroscopy. Coupling constants are reported in Hertz (Hz). Spectral splitting patterns are designated as s, singlet; d, doublet; t, triplet; q, quartet; p, pentet; m, multiplet and br, broad. High resolution mass spectra (HRMS) were obtained with a Bruker microTOF (ESI). Single crystal was tested and recorded on a Rigaku Super Nova Single Crystal Diffractometer.

## 2. Preparations of Substrates

The heterocyclic ynones **1a-1s** were prepared according to the reported methods.<sup>1,3</sup> **1a**, **1d**, **1g**, **1h**, **1j**, **1n**, **1q-s** were known compounds and their data were in agreement with the literature data. (**1a**, **1n**, **1q**, **1r**, **1s**, see Ref. 1; **1d**, **1g**, **1h**, **1j**, see Ref. 2)

### 2.1 Typical procedures for the synthesis of **1t**.

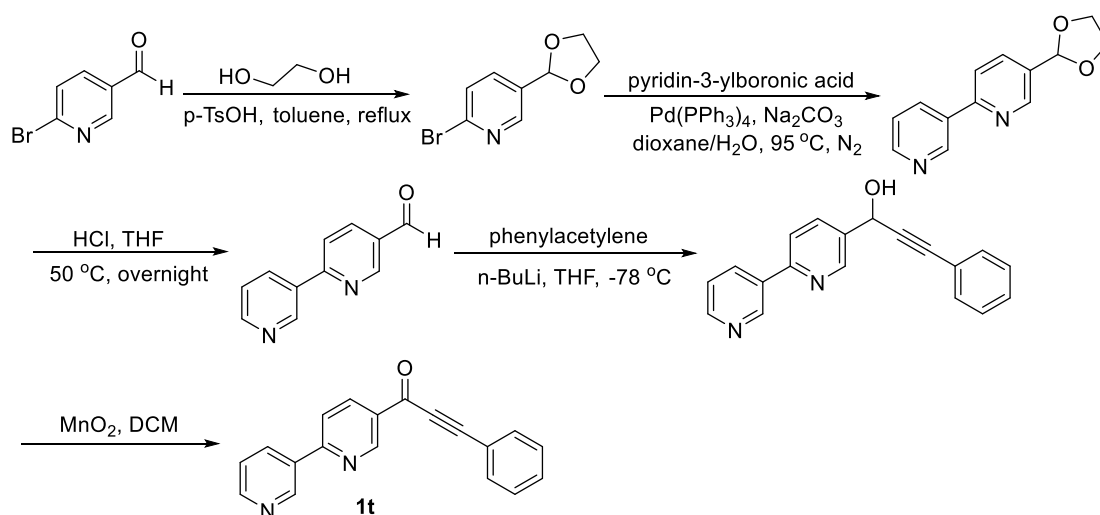

Add ethylene glycol (1.29 g, 20.9 mmol, 1.1 equiv.) to a suspension of 6-bromo-3-pyridine carbaldehyde (3.496 g, 19 mmol, 1.0 equiv.) and  $p$ -toluene

sulfonic acid (361 mg, 1.9 mmol, 0.1 equiv.) in 100 mL toluene in 250 mL flask. The mixture was reacted under Dean-Stark conditions in oil bath for 6-10 hours. After completion of the reaction (monitored by TLC), the mixture was cooled to room temperature, washed with saturated NaHCO<sub>3</sub> (30 mL) and NaCl (30 mL) aqueous solutions. The organic phase was separated, dried over anhydrous sodium sulfate and evaporated under reduced pressure. The resulting residue was purified by flash chromatography on silica gel (petroleum ether/EtOAc = 4:1) to give 2-bromo-5-(1,3-dioxolan-2-yl)pyridine as yellow oil (85%, 3.698g, 16.1 mmol).

To a 150 mL of schlenk reaction tube (with a Teflon-coated cap) equipped with a magnetic stir bar were added 2-bromo-5-(1,3-dioxolan-2-yl)pyridine (3.664 g, 16 mmol, 1.0 equiv.), pyridin-3-ylboronic acid (2.361 g, 19.2 mmol, 1.2 equiv.), Na<sub>2</sub>CO<sub>3</sub> (5.088 g, 48 mmol, 3.0 equiv.), Pd(PPh<sub>3</sub>)<sub>4</sub> (924 mg, 0.8 mmol, 0.05 equiv.), H<sub>2</sub>O (12 mL) and dioxane (68 mL). The reaction system was evacuated and purged with nitrogen for three times. The mixture was kept stirring at 80 °C in heated oil bath for 16 h. After completion, the mixture was cooled to room temperature, extracted with EtOAc and H<sub>2</sub>O, and the organic phase was collected, concentrated under reduced pressure. The thus-obtained crude product was purified by flash column chromatography on silica gel with petroleum ether/ethyl acetate (v/v=4:1) as eluent to afford the bipyridyl acetal in 75% yield as white solid (2.736 g, 12 mmol).

Concentrated hydrochloric acid (12 N, 30.0 mL) was added dropwise to a solution of bipyridyl acetal (2.736 g, 12 mmol) in THF (110 mL) and water (90 mL), and the mixture was kept stirring at room temperature for 18 h. After the reaction completed, the pH of the reaction solution was adjusted to 10 with saturated potassium carbonate solution, and then extracted with EtOAc. The organic phase was dried with sodium sulfate, filtered, concentrated under reduced pressure and purified by silica gel column chromatography (PE:EA=2:1) to obtain bipyridyl aldehyde (70%, 1.545g, 8.4 mmol).

n-BuLi (2.5 M solution in n-hexane, 3.6 mL, 9 mmol, 1.07 equiv.) was added dropwise to a solution of phenylacetylene (918mg, 9 mmol, 1.07 equiv.) in anhydrous THF (20 mL) at -78 °C under N<sub>2</sub> atmosphere, stirred at this temperature for 30



minutes and then 1.0 h at room temperature. After cooling to -78 °C, bipyridyl aldehyde (1.545g, 8.4 mmol, 1.0 equiv.) in 5 mL THF was added. The resulting solution was then warmed up to room temperature gradually and stirred for additional hours before quenched by saturated NH<sub>4</sub>Cl aqueous solution. The mixture was extracted with ethyl ether (2 x 10 mL), and the combined organic layers were dried over anhydrous MgSO<sub>4</sub>, concentrated under vacuum to afford the crude product alkynol. The crude product alkynol was dissolved in 20 mL anhydrous DCM, MnO<sub>2</sub> (5-10 equiv) was added, the resulting mixture was stirred at room temperature for 10 h. After the reaction completed (detected the reaction by TLC), the mixture was filtrated and the solution was concentrated under vacuum to afford the crude product, which was purified by flash chromatography on silica gel (petroleum ether/EtOAc = 1:1, V/V) to give **1t** as yellow solid (75%, 33.4% in total, 1.806g, 6.36 mmol).

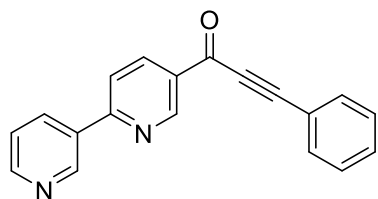

**1-([2,3'-bipyridin]-5-yl)-3-phenylprop-2-yn-1-one (1t).** Yellow solid (1.806 g, 33.4% in total, 6.36 mmol);  $R_f = 0.32$  (petroleum ether/ethyl acetate = 1:1, v/v); <sup>1</sup>H NMR (CDCl<sub>3</sub>, 600 MHz)  $\delta$  (ppm): 9.538-9.536 (m, 1H), 9.32 (s, 1H), 8.74 (s, 1H), 8.53 (dd,  $J_1 = 8.3$  Hz,  $J_2 = 2.2$  Hz, 1H), 8.43 (d,  $J = 8.0$  Hz, 1H), 7.93 (d,  $J = 8.2$  Hz, 1H), 7.72 (d,  $J = 7.0$  Hz, 2H), 7.53 (t,  $J = 7.5$  Hz, 1H), 7.48-7.45 (m, 3H); <sup>13</sup>C NMR (CDCl<sub>3</sub>, 150 MHz)  $\delta$  (ppm): 176.5, 150.3, 149.8, 139.2, 133.3, 132.7, 131.3, 129.8, 129.7, 129.5, 128.9, 127.9, 126.9, 119.8, 94.8, 86.6; MS (HRMS)  $m/z$  Calcd. for C<sub>19</sub>H<sub>13</sub>N<sub>2</sub>O<sup>+</sup> : 285.1022, [M+H]<sup>+</sup> found : 285.1024.

## 2.2 Typical procedures for the synthesis of **1u**.

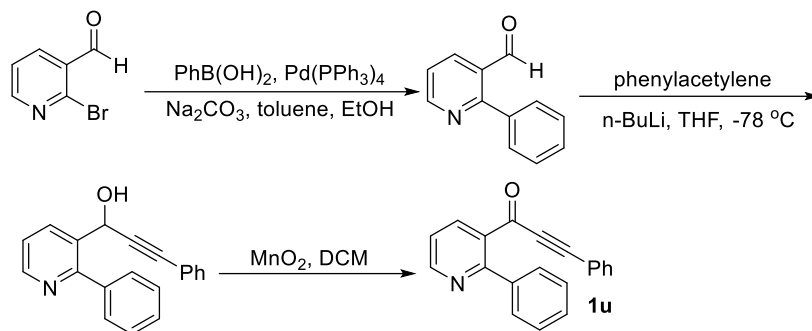

To a 150 mL of schlenk reaction tube (with a Teflon-coated cap) equipped with a magnetic stir bar were added toluene (100 mL), 2-bromonicotinaldehyde (1.86g, 10 mmol, 1.0 equiv.), phenylboronic acid (1.22g, 10 mmol, 1.0 equiv.) and sodium carbonate (30 mmol, 2M). Then, ethanol (6 mL) was added to this reaction mixture followed by Pd(PPh<sub>3</sub>)<sub>4</sub> (231 mg, 0.2 mmol, 0.02 equiv.). The reaction mixture was refluxed overnight under N<sub>2</sub> and then diluted with water. The organic layer was separated, the aqueous layer was extracted with EtOAc (2 × 30 mL). The combined organic layer was washed with water (3 × 30 mL) and brine (1 × 30 mL), dried over MgSO<sub>4</sub> and filtered. The filtrate was evaporated under reduced pressure, the crude product was purified by column chromatography on silica gel (petro/EtOAc=5/1) to give the desired coupling product (60%, 1.098 g, 6 mmol).

n-BuLi (2.5 M solution in n-hexane, 2.64 mL, 6.6 mmol, 1.1 equiv.) was added dropwise to a solution of phenylacetylene (673.2 mg, 6.6 mmol, 1.1 equiv.) in anhydrous THF (15 mL) at -78 °C under N<sub>2</sub> atmosphere, stirred at -78 °C for 30 minutes and then 1.0 h at room temperature. After cooling to -78 °C, the above-obtained aldehyde (1.098 g, 6.0 mmol, 1.0 equiv.) in 5 mL THF was added. The solution was then warmed up to room temperature gradually and stirred for additional hours before quenched by saturated NH<sub>4</sub>Cl aqueous solution. The mixture was extracted with ethyl ether (2 x 10 mL), and the combined organic layers were dried over anhydrous MgSO<sub>4</sub>, concentrated under vacuum to afford the crude product. The crude product was dissolved in 20 mL anhydrous DCM, MnO<sub>2</sub> (5-10 equiv) was added, the resulting mixture was stirred at room temperature for 10 h. After the reaction completed (detected the reaction by TLC), the mixture was filtrated and the solution was concentrated under vacuum to afford the crude product, which was

purified by flash chromatography on silica gel (petroleum ether/EtOAc = 5:1) to give **1u** as light yellow solid (70%, 42% in total, 1.188 g, 4.2 mmol).

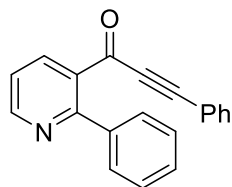

**3-phenyl-1-(2-phenylpyridin-3-yl)prop-2-yn-1-one (1u)**. Light yellow solid (1.188 g, 42% in total);  $R_f = 0.32$  (petroleum ether/ethyl acetate = 4:1, v/v);  $^1\text{H NMR}$  ( $\text{CDCl}_3$ , 600 MHz)  $\delta$  (ppm): 8.80-8.79 (m, 1H), 8.18 (dd,  $J_1 = 7.8$  Hz,  $J_2 = 1.7$  Hz, 1H), 7.66 (d,  $J = 8.0$  Hz, 2H), 7.45 (t,  $J = 7.4$  Hz, 2H), 7.39 (t,  $J = 7.4$  Hz, 1H), 7.37-7.35 (m, 1H), 7.33 (t,  $J = 7.5$  Hz, 1H), 7.23 (t,  $J = 7.8$  Hz, 2H), 7.16 (d,  $J = 8.3$  Hz, 2H);  $^{13}\text{C NMR}$  ( $\text{CDCl}_3$ , 150 MHz)  $\delta$  (ppm): 179.7, 159.3, 151.9, 139.6, 137.8, 134.1, 133.1, 130.9, 130.1, 129.5, 128.53, 128.45, 122.0, 119.7, 94.9, 88.5; MS (HRMS)  $m/z$  Calcd. for  $\text{C}_{20}\text{H}_{14}\text{NO}^+$ : 284.1070,  $[\text{M}+\text{H}]^+$  found: 284.1073.

### 3. Optimization of Reaction Conditions

Reaction conditions were optimized using the model reaction between 3-phenyl-1-(pyridin-3-yl)prop-2-yn-1-one (**1a**) and cyclohexane (**2a**), and the results are outlined in Table S1.

We screened Cu metal source as catalysts including CuBr, CuCl, CuI,  $\text{Cu}_2\text{O}$ ,  $\text{Cu}(\text{OAc})_2$  and found product **3a** was generated in 54-70% yields (entries 2-5). Several Fe salts such as  $\text{FeCl}_3$ ,  $\text{Fe}(\text{acac})_3$  and  $\text{FeCl}_2 \cdot 4\text{H}_2\text{O}$  were also tested, and only moderate yield was obtained (entries 6-8). The yield of **3a** was only 46% in the absence of catalyst (entry 9). Some organic oxidants such as DTBP, DCP, CHP, BPO, TBPB,  $\text{H}_2\text{O}_2$  and inorganic oxidant  $\text{K}_2\text{S}_2\text{O}_8$  were screened, and TBPB was found to be the optimal oxidant in this reaction system (entries 10-16), and the reaction did not occur without an oxidant (entry 17). Further screenings indicated that 120 °C was the optimal temperature (entries 18, 19 vs 14). It was also found that 4.0 equivalents of TBHP gave the best yield (entries 20, 21 vs 14) and the

optimal reaction time was 24 hours (entries 22, 23 vs 14). When cyclohexane (**2a**) was used as both reactant and solvent without the addition of other solvents the reaction proceeded most effectively (entry 24 vs 14). It should be mentioned that in contrast to the traditional protocols of Minisci reaction, the addition of an acid (TFA) did not benefit the current reaction (entry 25).

**Table S1 Optimization of Reaction Conditions<sup>a</sup>**

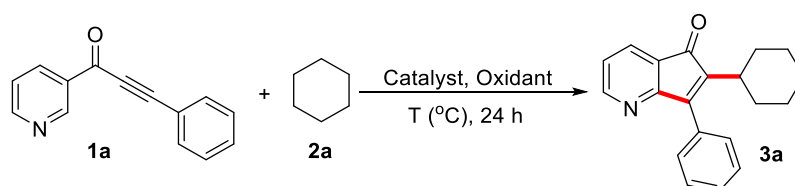

| entry           | catalyst                             | oxidant                                      | T (°C) | yield (%) <sup>b</sup> |
|-----------------|--------------------------------------|----------------------------------------------|--------|------------------------|
| 1               | CuBr                                 | TBHP <sup>c</sup>                            | 120    | 60                     |
| 2               | CuCl                                 | TBHP                                         | 120    | 62                     |
| 3               | CuI                                  | TBHP                                         | 120    | 54                     |
| 4               | Cu <sub>2</sub> O                    | TBHP                                         | 120    | 70                     |
| 5               | Cu(OAc) <sub>2</sub>                 | TBHP                                         | 120    | 57                     |
| 6               | FeCl <sub>3</sub>                    | TBHP                                         | 120    | 52                     |
| 7               | Fe(acac) <sub>3</sub>                | TBHP                                         | 120    | 55                     |
| 8               | FeCl <sub>2</sub> ·4H <sub>2</sub> O | TBHP                                         | 120    | 50                     |
| 9               | --                                   | TBHP                                         | 120    | 46                     |
| 10              | Cu <sub>2</sub> O                    | DTBP <sup>d</sup>                            | 120    | 71                     |
| 11              | Cu <sub>2</sub> O                    | DCP <sup>e</sup>                             | 120    | 68                     |
| 12              | Cu <sub>2</sub> O                    | CHP <sup>f</sup>                             | 120    | 32                     |
| 13              | Cu <sub>2</sub> O                    | BPO <sup>g</sup>                             | 120    | 58                     |
| 14              | Cu <sub>2</sub> O                    | TBPB <sup>h</sup>                            | 120    | 78                     |
| 15              | Cu <sub>2</sub> O                    | H <sub>2</sub> O <sub>2</sub> <sup>i</sup>   | 120    | 38                     |
| 16              | Cu <sub>2</sub> O                    | K <sub>2</sub> S <sub>2</sub> O <sub>8</sub> | 120    | 0                      |
| 17              | Cu <sub>2</sub> O                    | --                                           | 120    | trace                  |
| 18              | Cu <sub>2</sub> O                    | TBPB                                         | 110    | 70                     |
| 19              | Cu <sub>2</sub> O                    | TBPB                                         | 130    | 77                     |
| 20 <sup>j</sup> | Cu <sub>2</sub> O                    | TBPB                                         | 120    | 71                     |
| 21 <sup>k</sup> | Cu <sub>2</sub> O                    | TBPB                                         | 120    | 78                     |

|                 |                   |      |     |    |
|-----------------|-------------------|------|-----|----|
| 22 <sup>l</sup> | Cu <sub>2</sub> O | TBPB | 120 | 73 |
| 23 <sup>m</sup> | Cu <sub>2</sub> O | TBPB | 120 | 79 |
| 24 <sup>n</sup> | Cu <sub>2</sub> O | TBPB | 120 | 43 |
| 25 <sup>o</sup> | Cu <sub>2</sub> O | TBPB | 120 | 61 |

<sup>a</sup>Reaction conditions. <sup>b</sup>Isolated yield. <sup>c</sup>TBHP = t-BuOOH (70% aq.). <sup>d</sup>DTBP = di-tert-butyl peroxide. <sup>e</sup>DCP = dicumyl peroxide. <sup>f</sup>CHP = cumene hydroperoxide. <sup>g</sup>BPO = benzoyl peroxide. <sup>h</sup>TBPB = tert-butyl peroxybenzoate. <sup>i</sup>H<sub>2</sub>O<sub>2</sub> = hydrogen peroxide. <sup>j</sup>3.0 equivalents of TBPB was used; <sup>k</sup>5.0 equivalents of TBPB was used; <sup>l</sup>18 hours; <sup>m</sup>30 hours; <sup>n</sup>THF/ Cyclohexane (V/V=1:1) was used as solvent; <sup>o</sup>1.2 equivalents of TFA was added.

#### 4. Typical Procedure for the Vinyl Radical Cascade Annulation (**3a**)

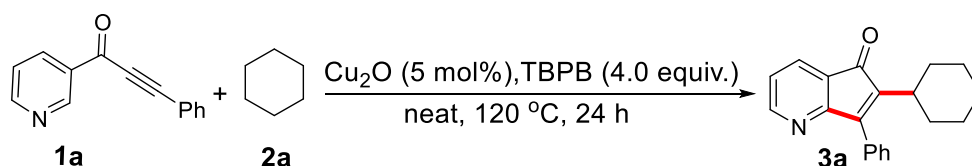

To a 10 mL of schlenk reaction tube (with a Teflon-coated cap) equipped with a magnetic stir bar were added 3-phenyl-1-(pyridin-3-yl)prop-2-yn-1-one (**1a**, 51.8 mg, 0.25 mmol, 1.0 equiv.), Cu<sub>2</sub>O (1.2 mg, 0.0125 mmol, 0.05 equiv.) and TBPB (194.2 mg, 1.0 mmol, 4.0 equiv.). Then, 2.0 mL of cyclohexane (**2a**) was added and the mixture was kept stirring in oil bath at 120 °C for 24 h. After the reaction completed, the mixture was cooled to room temperature, extracted with saturated NaHCO<sub>3</sub> aqueous solution and EtOAc. The organic layer was then concentrated under vacuum and purified by flash column chromatography on silica gel with petroleum ether/ethyl acetate (V/V = 10:1) as eluent to afford **3a** (78%, 56.3 mg) as yellow oil.

#### 5. Procedures for Gram-Scale Synthesis of **11**

##### a: Gram-Scale Synthesis of **3a**

To a 150 mL of schlenk reaction tube (with a Teflon-coated cap) equipped with a magnetic stir bar was added 3-phenyl-1-(pyridin-3-yl)prop-2-yn-1-one (**1a**, 5 mmol, 1.036 g), Cu<sub>2</sub>O (0.25 mmol, 24 mg), TBPB (20 mmol, 3.884 g), Then, 30 mL of cyclohexane (**2a**) was added and the mixture was stirred in oil bath at 120 °C for 24 h.

After completion, the mixture was cooled to room temperature, extracted with saturated NaHCO<sub>3</sub> aqueous and EtOAc, concentrated under reduced pressure, then purified by flash column chromatography on silica gel with petroleum [eluent: 10:1 (v/v) of petroleum ether/ethyl acetate] to afford the desired product **3a** as yellow oil in 63% yield (910.4 mg).

### b: Gram-Scale Synthesis of **11**

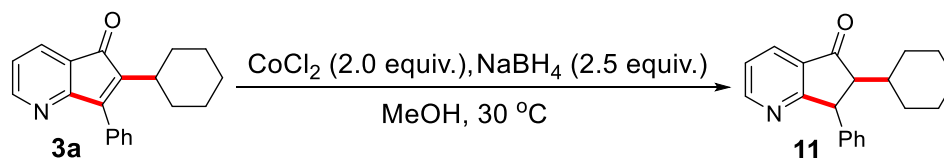

The reduction was carried out in CH<sub>3</sub>OH with a ratio of **3a**/CoCl<sub>2</sub>/NaBH<sub>4</sub> of 1:2:2.5 according to the literature<sup>4</sup>. To a 500-mL round bottom flask with a magnetic stir bar was added **3a** (910.4 mg, 3.15 mmol, 1.0 equiv.) and 300 mL CH<sub>3</sub>OH, the mixture stirred for 10 minutes. CoCl<sub>2</sub>·6H<sub>2</sub>O (1.498 g, 6.3 mmol, 2.0 equiv.) was added, the solutions turned deep pink and continued stirring for 30 minutes. Then, NaBH<sub>4</sub> (297.9 mg, 7.875 mmol, 2.5 equiv.) was added to the reaction mixture in portions. After completed (monitored by TLC), HCl (6N) was added, and the mixture was stirred for 1 h. Saturated Na<sub>2</sub>CO<sub>3</sub> aqueous solution was added until pH = 10. After that, the mixture was extracted with EtOAc (100 mL x3). The organic layers were combined and washed with water (100 mL), concentrated under vacuum and then purified by flash column chromatography on silica gel with petroleum ether/ethyl acetate (V/V = 4:1) as eluent to afford **11** (843.3 mg, 92%, 58% in total) as colorless oil.

## 6. Mechanistic investigation

The mechanistic investigation included trapping of cyclohexyl radical and isotope labeling experiments, and the results was outlined in Scheme S1.

### 6.1 Results of control experiments

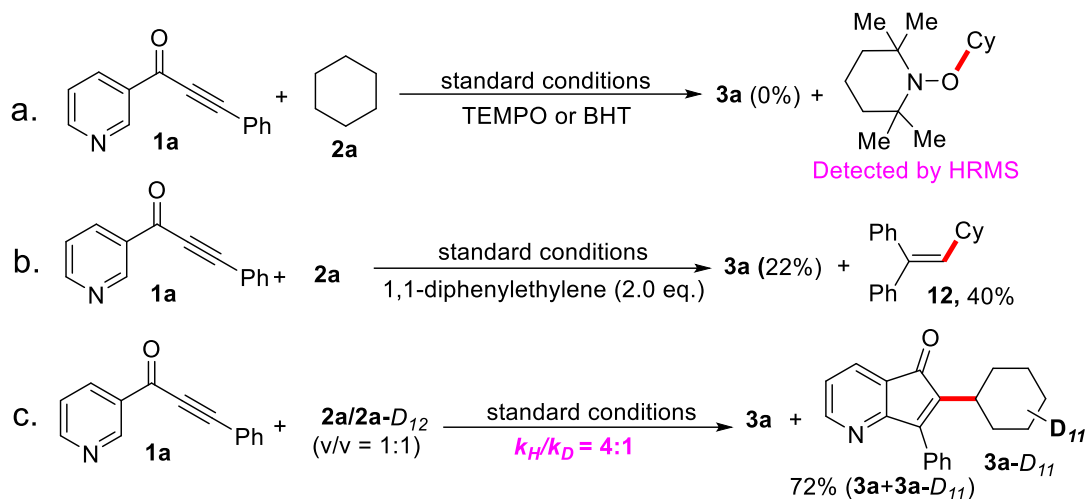

## Scheme S1 control experiments

### 6.2 Trapping of cyclohexyl radical

#### 6.2.1 Trapping by TEMPO

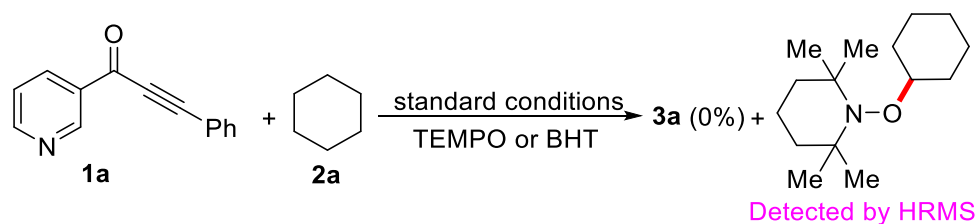

The reaction was performed according to the general procedure except for the addition of 2.5 equivalents of radical scavenger (2,2,6,6-tetramethylpiperidinoxy, TEMPO). After the reaction completed, the reaction mixture was detected by ESI-HRMS. The adduct of cyclohexyl radical with TEMPO was detected, as shown in Figure S1.

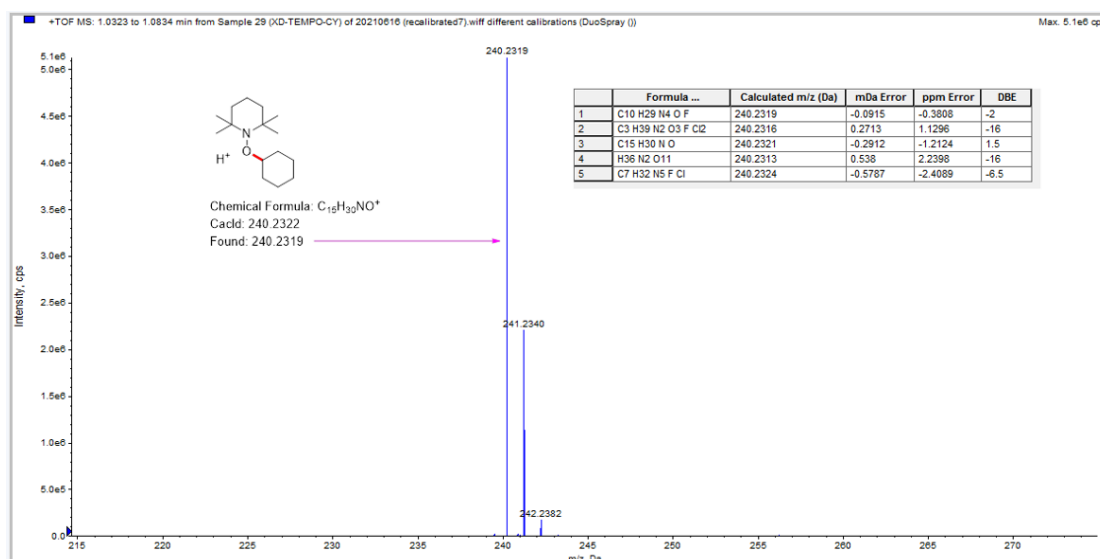

Figure S1. HRMS spectra of TEMPO-cyclohexyl adduct

## 6.2.2 Trapping by 1,1-diphenylethylene

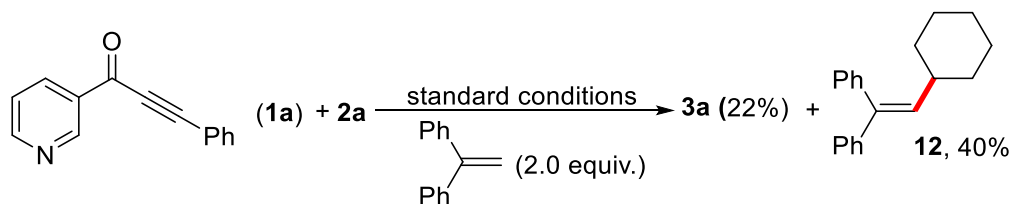

The reaction was performed according to the general procedure except for the additional addition of 1,1-diphenylethylene (91 mg, 0.5 mmol, 2.0 equiv.). The mixture was stirred in oil bath at 120 °C for 24 h. After that, the mixture was cooled to room temperature, and purified by column chromatography (eluent: petroleum ether/ethyl acetate = 20/1, v/v) to afford **3a** in yield of 22% and the adduct of cyclohexyl radical with 1,1-diphenylethylene in 40% yield. The NMR spectra of **12** were outlined in Figure S2.



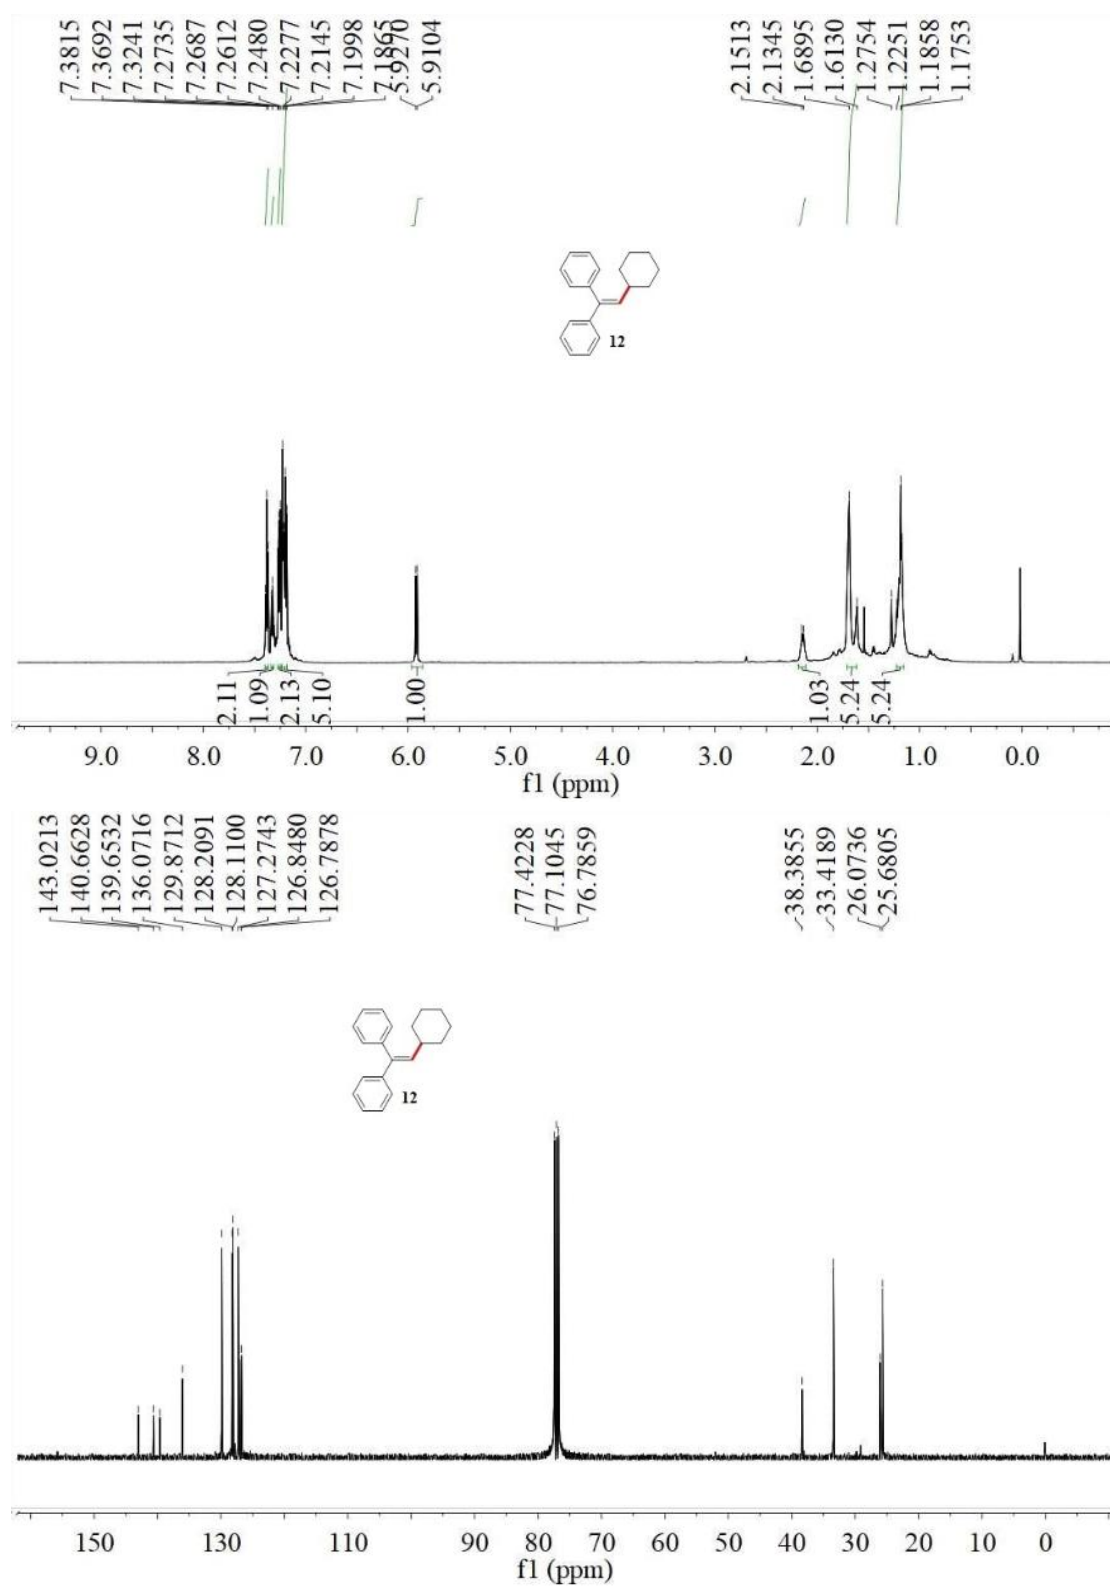

Figure S2 <sup>1</sup>H NMR and <sup>13</sup>C NMR spectrum of 12

### 6.3 Isotope labeling experiments

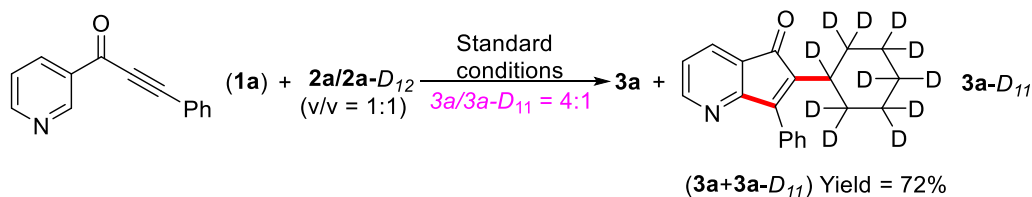

The reaction was performed according to the general procedure except that the mixture of cyclohexane (1.0 mL) and  $D_{12}$ -cyclohexane (1.0 mL) was used instead of cyclohexane (2.0 mL). The mixture was kept stirring in oil bath at 120 °C for 24 h. After completion, the mixture was cooled to room temperature and purified by flash column chromatography on silica gel with petroleum ether/ethyl acetate (v/v = 10:1) as eluent to afford the product ( $\mathbf{3a} + D_{11}$ - $\mathbf{3a}$ ) in 72%. The ratio of hydrogen to deuterium (H/D) was determined from the  $^1\text{H}$  NMR (as outlined in Figure S3).

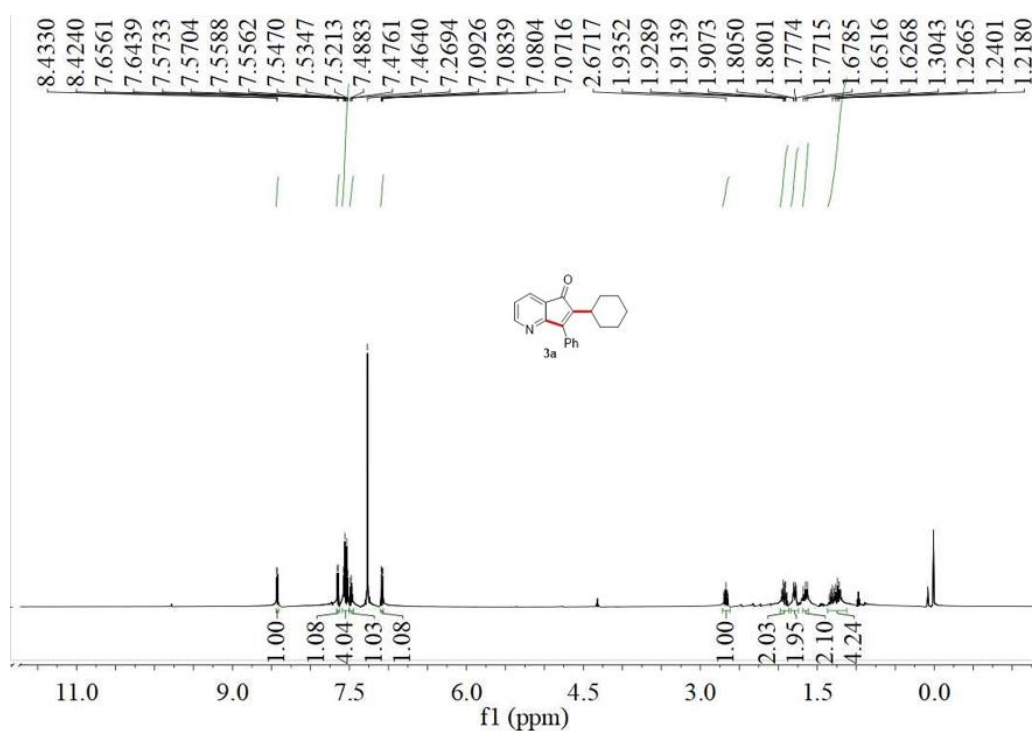

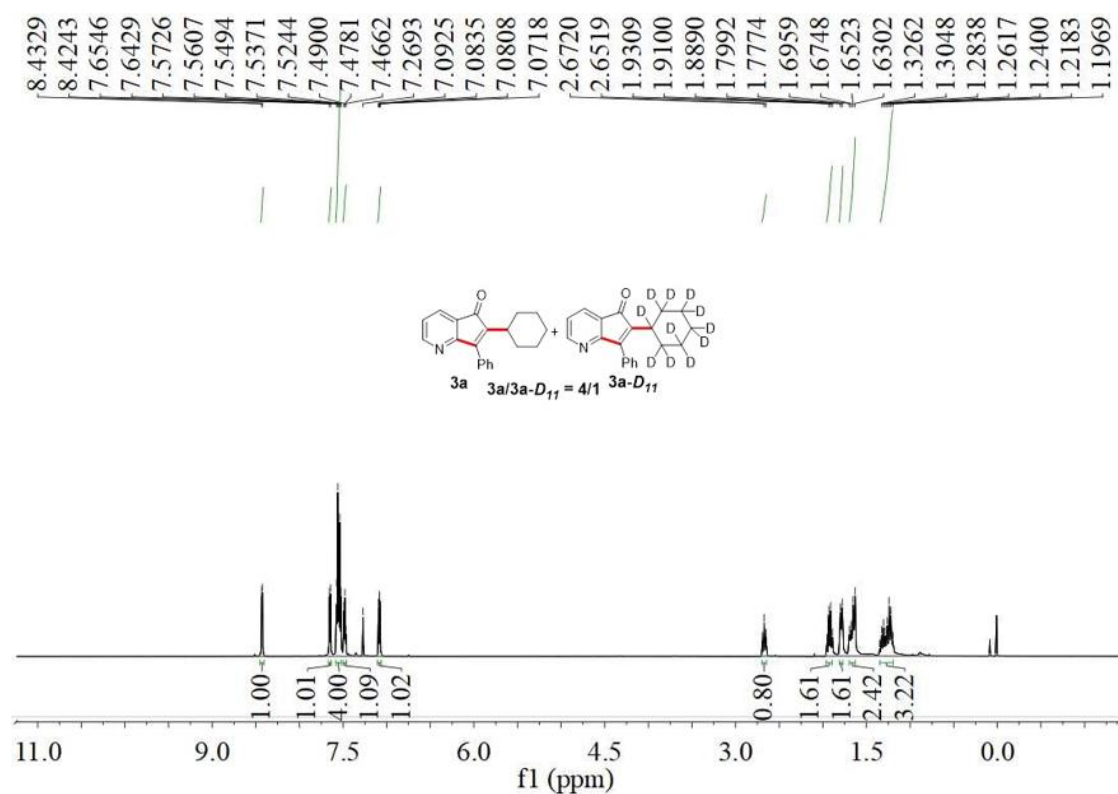

**Figure S3.** <sup>1</sup>H NMR spectrum of **3a**, and a mixture of (**3a**+D<sub>11</sub>-**3a**)

## 7. X-ray single crystal structure and data of **3t** (CCDC 2112049)

CCDC 2112049 contains the supplementary crystallographic data (**3t**) for this paper. These data can be obtained free of charge via <https://www.ccdc.cam.ac.uk/structures/Search?Cccid=2112049&DatabaseToSearch=Published> or by emailing [data\\_request@ccdc.cam.ac.uk](mailto:data_request@ccdc.cam.ac.uk)

Solvent system and method for crystal growth: the cultivation of single crystal (**3t**) was in nuclear magnet tube with the slowly volatilization of deuterated chloroform.

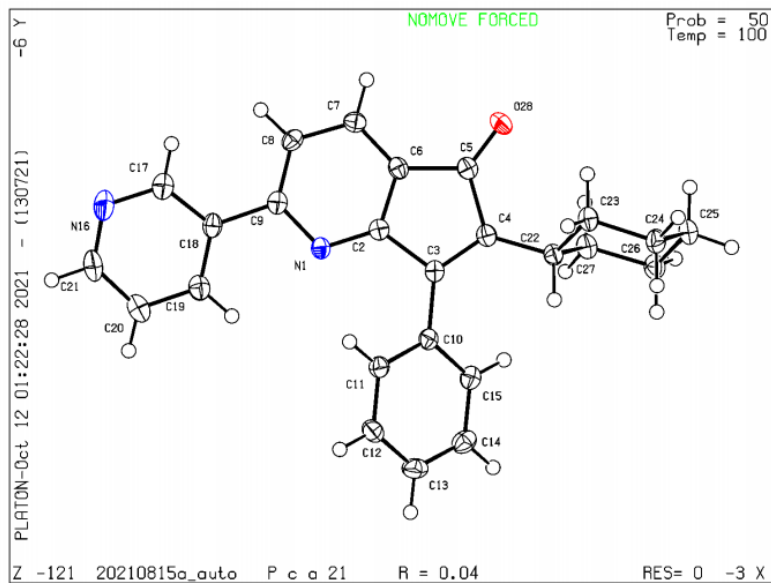

**Figure S4. Ellipsoid form showing in the single crystal structure of 3t.**

**Displacement ellipsoids are scaled to the 50% probability level.**

|                                |                                                |
|--------------------------------|------------------------------------------------|
|                                | <b>3x</b>                                      |
| CCDC NO.                       | 2112049                                        |
| Description                    | block                                          |
| color                          | fluorescent light colourless                   |
| from solution                  | $\text{CDCl}_3$                                |
| empirical formula              | $\text{C}_{25}\text{H}_{22}\text{N}_2\text{O}$ |
| Mr                             | 366.44                                         |
| crystal size ( $\text{mm}^3$ ) | $0.12 \times 0.1 \times 0.2$                   |
| crystal system                 | orthorhombic                                   |
| space group                    | P ca21                                         |
| a [ $\text{\AA}$ ]             | 22.1929 (4)                                    |
| b [ $\text{\AA}$ ]             | 12.0792 (3)                                    |
| c [ $\text{\AA}$ ]             | 7.0699 (2)                                     |
| $\alpha$ [deg]                 | 90                                             |

|                            |                |
|----------------------------|----------------|
| $\beta$ [deg]              | 90             |
| $\gamma$ [deg]             | 90             |
| V/ [Å <sup>3</sup> ]       | 1895.25(8)     |
| d/[g/cm <sup>3</sup> ]     | 1.284          |
| Z                          | 4              |
| T [K]                      | 100            |
| R1, wR2 I > 2 $\sigma$ (I) | 0.0377; 0.0949 |
| R1, wR (all data)          | 0.0363; 0.0935 |
| quality of fit             | 1.051          |

## 8. Characterization data for the new compounds (substrates and products)

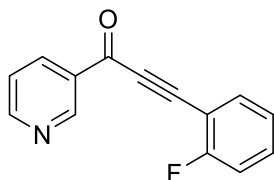

### 3-(2-fluorophenyl)-1-(pyridin-3-yl)prop-2-yn-1-one (1b)

Yellow solid (731.3 mg, 65%);  $R_f = 0.33$  (petroleum ether/ethyl acetate = 4:1, v/v); <sup>1</sup>H NMR (CDCl<sub>3</sub>, 600 MHz)  $\delta$  (ppm): 9.46 (s, 1H), 8.85 (s, 1H), 8.46 (d,  $J = 8.0$  Hz, 1H), 7.69-7.66 (m, 1H), 7.53-7.47 (m, 2H), 7.24-7.18 (m, 2H); <sup>13</sup>C NMR (CDCl<sub>3</sub>, 150 MHz)  $\delta$  (ppm): 176.3, 164.0 (d,  $J = 254.5$  Hz), 154.4, 151.5, 136.5, 135.0, 133.4 (d,  $J = 8.5$  Hz), 124.6 (d,  $J = 3.9$  Hz), 123.7, 116.1 (d,  $J = 20.3$  Hz), 108.7, 108.6, 90.8, 87.9; MS (HRMS)  $m/z$  Calcd. for C<sub>14</sub>H<sub>9</sub>FNO<sup>+</sup> : 226.0663, [M+H]<sup>+</sup> found : 226.0659.

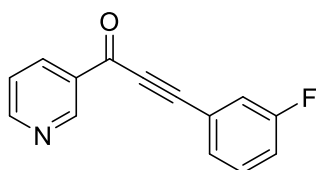

### 3-(3-fluorophenyl)-1-(pyridin-3-yl)prop-2-yn-1-one (1c)

White solid (765.0 mg, 68%);  $R_f = 0.34$  (petroleum ether/ethyl acetate = 4:1, v/v);  $^1\text{H}$  NMR ( $\text{CDCl}_3$ , 600 MHz)  $\delta$  (ppm): 9.43 (s, 1H), 8.862-8.855 (m, 1H), 8.43-8.41 (m, 1H), 7.50-7.48 (m, 2H), 7.44-7.41 (m, 1H), 7.38 (d,  $J = 8.7$  Hz, 1H), 7.25-7.21 (m, 1H);  $^{13}\text{C}$  NMR ( $\text{CDCl}_3$ , 150 MHz)  $\delta$  (ppm): 176.3, 162.4 (d,  $J = 247.2$  Hz), 154.5, 151.5, 136.3, 132.1, 130.6 (d,  $J = 8.6$  Hz), 129.1 (d,  $J = 3.5$  Hz), 123.7, 121.4 (d,  $J = 9.3$  Hz), 119.9 (d,  $J = 23.3$  Hz), 118.8 (d,  $J = 21.1$  Hz), 92.7, 86.5; MS (HRMS)  $m/z$  Calcd. for  $\text{C}_{14}\text{H}_9\text{FNO}^+$  : 226.0663,  $[\text{M}+\text{H}]^+$  found : 226.0668.

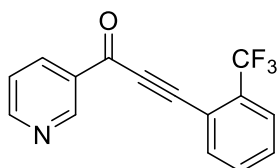

### 1-(pyridin-3-yl)-3-(2-(trifluoromethyl)phenyl)prop-2-yn-1-one (1e)

Yellow solid (797.5 mg, 58%);  $R_f = 0.33$  (petroleum ether/ethyl acetate = 4:1, v/v);  $^1\text{H}$  NMR ( $\text{CDCl}_3$ , 600 MHz)  $\delta$  (ppm): 9.42 (s, 1H), 8.86-8.85 (m, 1H), 8.45 (d,  $J = 7.9$  Hz, 1H), 7.87 (d,  $J = 6.8$  Hz, 1H), 7.78 (d,  $J = 8.5$  Hz, 1H), 7.65-7.61 (m, 2H), 7.50-7.48 (m, 1H);  $^{13}\text{C}$  NMR ( $\text{CDCl}_3$ , 100 MHz)  $\delta$  (ppm): 176.3, 154.5, 151.3, 136.5, 136.0, 132.7 (q,  $J = 31.4$  Hz), 132.2, 132.0, 131.0, 126.4 (q,  $J = 5.0$  Hz), 123.7, 123.3 (q,  $J = 272.0$  Hz), 117.9 (q,  $J = 2.1$  Hz), 90.4, 88.9; MS (HRMS)  $m/z$  Calcd. for  $\text{C}_{15}\text{H}_9\text{F}_3\text{NO}^+$  : 276.0631,  $[\text{M}+\text{H}]^+$  found : 276.0638.

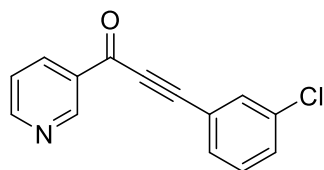

### 3-(3-chlorophenyl)-1-(pyridin-3-yl)prop-2-yn-1-one (1f)

Yellow solid (759.2 mg, 63%);  $R_f = 0.33$  (petroleum ether/ethyl acetate = 4:1, v/v);  $^1\text{H}$  NMR ( $\text{CDCl}_3$ , 600 MHz)  $\delta$  (ppm): 9.43 (s, 1H), 8.87-8.86 (m, 1H), 8.42 (d,  $J = 7.9$  Hz, 1H), 7.68 (s, 1H), 7.59 (d,  $J = 7.7$  Hz, 1H), 7.50-7.48 (m, 2H), 7.39 (t,  $J = 7.9$  Hz, 1H);  $^{13}\text{C}$  NMR ( $\text{CDCl}_3$ , 150 MHz)  $\delta$  (ppm): 176.2, 154.5, 151.5, 136.3, 134.9, 132.9, 132.1, 131.6, 131.3, 130.2, 123.7, 121.4, 92.5, 86.8; MS (HRMS)  $m/z$  Calcd. for  $\text{C}_{14}\text{H}_9\text{ClNO}^+$  : 242.0367,  $[\text{M}+\text{H}]^+$  found : 242.0370.

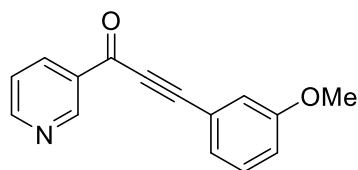

### 3-(3-methoxyphenyl)-1-(pyridin-3-yl)prop-2-yn-1-one (1i)

Yellow solid (829.5 mg, 70%);  $R_f = 0.34$  (petroleum ether/ethyl acetate = 4:1, v/v);  $^1\text{H}$  NMR ( $\text{CDCl}_3$ , 400 MHz)  $\delta$  (ppm): 9.45 (s, 1H), 8.852-8.845 (m, 1H), 8.43 (d,  $J = 7.9$  Hz, 1H), 7.49-7.47 (m, 1H), 7.35 (t,  $J = 7.9$  Hz, 1H), 7.30 (t,  $J = 7.5$  Hz, 1H), 7.20 (s, 1H), 7.07 (dd,  $J_1 = 8.1$  Hz,  $J_2 = 2.1$  Hz, 1H), 3.85 (s, 3H);  $^{13}\text{C}$  NMR ( $\text{CDCl}_3$ , 100 MHz)  $\delta$  (ppm): 176.5, 159.6, 154.4, 151.6, 136.3, 132.3, 130.0, 125.9, 123.7, 120.6, 118.2, 117.7, 94.7, 86.0, 55.6; MS (HRMS)  $m/z$  Calcd. for  $\text{C}_{15}\text{H}_{12}\text{NO}_2^+$  : 238.0863,  $[\text{M}+\text{H}]^+$  found : 238.0857.

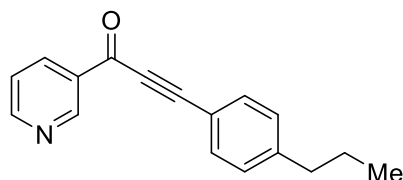

### 3-(4-propylphenyl)-1-(pyridin-3-yl)prop-2-yn-1-one (1k)

Yellow oli (647.5 mg, 52%);  $R_f = 0.34$  (petroleum ether/ethyl acetate = 4:1, v/v);  $^1\text{H}$  NMR ( $\text{CDCl}_3$ , 600 MHz)  $\delta$  (ppm): 9.41 (s, 1H), 8.81-8.80 (m, 1H), 8.40 (td,  $J_1 = 7.9$  Hz,  $J_2 = 2.0$  Hz, 1H), 7.58 (d,  $J = 8.2$  Hz, 2H), 7.45-7.43 (m, 1H), 7.21 (d,  $J = 8.1$  Hz, 2H), 2.60 (t,  $J = 7.6$  Hz, 2H), 1.66-1.60 (m, 2H), 0.92 (t,  $J = 7.4$  Hz, 3H);  $^{13}\text{C}$  NMR ( $\text{CDCl}_3$ , 150 MHz)  $\delta$  (ppm): 176.5, 154.2, 151.4, 146.9, 136.3, 133.4, 132.4, 129.1, 123.6, 116.7, 95.6, 86.3, 38.2, 24.2, 13.8; MS (HRMS)  $m/z$  Calcd. for  $\text{C}_{17}\text{H}_{16}\text{NO}^+$  : 250.1226,  $[\text{M}+\text{H}]^+$  found : 250.1229.

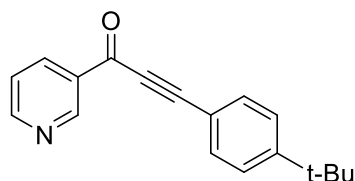

### 3-(4-(tert-butyl)phenyl)-1-(pyridin-3-yl)prop-2-yn-1-one (1l)

Yellow solid (723.3 mg, 55%);  $R_f = 0.34$  (petroleum ether/ethyl acetate = 4:1, v/v);  $^1\text{H}$  NMR ( $\text{CDCl}_3$ , 600 MHz)  $\delta$  (ppm): 9.45 (s, 1H), 8.84-8.83 (m, 1H), 8.43 (d,  $J = 7.9$  Hz, 1H), 7.64 (d,  $J = 8.3$  Hz, 2H), 7.49-7.45 (m, 3H), 1.34 (s, 9H);  $^{13}\text{C}$  NMR ( $\text{CDCl}_3$ ,

150 MHz)  $\delta$  (ppm): 176.4, 155.3, 154.0, 151.4, 136.4, 133.3, 132.5, 126.0, 123.7, 116.5, 95.7, 86.3, 35.3, 31.1; MS (HRMS)  $m/z$  Calcd. for  $C_{18}H_{18}NO^+$  : 264.1383,  $[M+H]^+$  found : 264.1387.

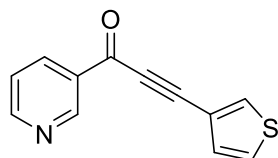

### 1-(pyridin-3-yl)-3-(thiophen-3-yl)prop-2-yn-1-one (1m)

Yellow solid (511.2 mg, 48%);  $R_f$  = 0.33 (petroleum ether/ethyl acetate = 4:1, v/v);  $^1H$  NMR ( $CDCl_3$ , 600 MHz)  $\delta$  (ppm): 9.42 (s, 1H), 8.842-8.835 (m, 1H), 8.41 (d,  $J$  = 7.9 Hz, 1H), 7.90 (s, 1H), 7.48-7.46 (m, 1H), 7.41-7.39 (m, 1H), 7.34 (d,  $J$  = 5.1 Hz, 1H);  $^{13}C$  NMR ( $CDCl_3$ , 150 MHz)  $\delta$  (ppm): 176.5, 154.3, 151.5, 136.2, 134.8, 132.3, 130.4, 126.6, 123.6, 119.0, 90.2, 86.8; MS (HRMS)  $m/z$  Calcd. for  $C_{12}H_8NOS^+$  : 214.0321,  $[M+H]^+$  found : 214.0315.

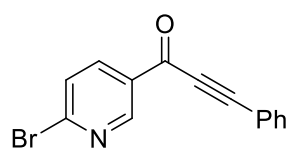

### 1-(6-bromopyridin-3-yl)-3-phenylprop-2-yn-1-one (1o)

Yellow solid (954.8 mg, 67%);  $R_f$  = 0.32 (petroleum ether/ethyl acetate = 4:1, v/v);  $^1H$  NMR ( $CDCl_3$ , 600 MHz)  $\delta$  (ppm): 9.15 (s, 1H), 8.24 (d,  $J$  = 8.3 Hz, 1H), 7.66 (d,  $J$  = 7.8 Hz, 2H), 7.64 (d,  $J$  = 8.3 Hz, 1H), 7.51 (t,  $J$  = 7.5 Hz, 1H), 7.43 (t,  $J$  = 7.7 Hz, 2H);  $^{13}C$  NMR ( $CDCl_3$ , 150 MHz)  $\delta$  (ppm): 175.3, 151.9, 147.9, 138.2, 133.4, 131.5, 128.9, 128.4, 119.4, 95.3, 86.2; MS (HRMS)  $m/z$  Calcd. for  $C_{14}H_9BrNO^+$  : 285.9862,  $[M+H]^+$  found : 285.9865.

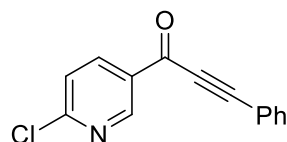

### 1-(6-chloropyridin-3-yl)-3-phenylprop-2-yn-1-one (1p)

Yellow solid (735.1 mg, 61%);  $R_f$  = 0.32 (petroleum ether/ethyl acetate = 4:1, v/v);  $^1H$  NMR ( $CDCl_3$ , 600 MHz)  $\delta$  (ppm): 9.23 (s, 1H), 8.38 (d,  $J$  = 8.2 Hz, 1H), 7.70 (d,  $J$  = 7.6 Hz, 2H), 7.54 (t,  $J$  = 7.4 Hz, 1H), 7.50 (d,  $J$  = 8.3 Hz, 1H), 7.46 (t,  $J$  = 7.7 Hz, 2H);  $^{13}C$  NMR ( $CDCl_3$ , 100 MHz)  $\delta$  (ppm): 175.1, 156.6, 151.8, 138.7, 133.4, 131.6, 131.3,



129.0, 124.6, 119.4, 95.3, 86.2; MS (HRMS)  $m/z$  Calcd. for  $C_{14}H_9ClNO^+$  : 242.0367,  $[M+H]^+$  found : 242.0364.

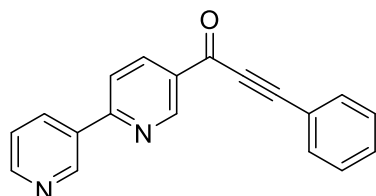

### 1-([2,3'-bipyridin]-5-yl)-3-phenylprop-2-yn-1-one (1t)

White solid (511.2 mg, 48%);  $R_f = 0.30$  (petroleum ether/ethyl acetate = 1:1, v/v);  $^1H$  NMR ( $CDCl_3$ , 600 MHz)  $\delta$  (ppm): 9.538-9.536 (m, 1H), 9.32 (s, 1H), 8.74 (s, 1H), 8.53 (dd,  $J_1 = 8.3$  Hz,  $J_2 = 2.2$  Hz, 1H), 8.43 (d,  $J = 8.0$  Hz, 1H), 7.93 (d,  $J = 8.2$  Hz, 1H), 7.72 (d,  $J = 7.0$  Hz, 2H), 7.53 (t,  $J = 7.5$  Hz, 1H), 7.48-7.45 (m, 3H);  $^{13}C$  NMR ( $CDCl_3$ , 150 MHz)  $\delta$  (ppm): 176.5, 150.3, 149.8, 139.2, 133.3, 132.7, 131.3, 129.8, 129.7, 129.5, 128.9, 127.9, 126.9, 119.8, 94.8, 86.6; MS (HRMS)  $m/z$  Calcd. for  $C_{19}H_{13}N_2O^+$  : 285.1022,  $[M+H]^+$  found : 285.1024.

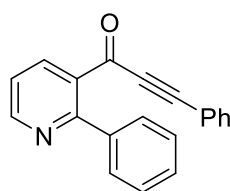

### 3-phenyl-1-(2-phenylpyridin-3-yl)prop-2-yn-1-one (1u)

Light yellow solid (1.188 g, 42% in total);  $R_f = 0.32$  (petroleum ether/ethyl acetate = 4:1, v/v);  $^1H$  NMR ( $CDCl_3$ , 600 MHz)  $\delta$  (ppm): 8.80-8.79 (m, 1H), 8.18 (dd,  $J_1 = 7.8$  Hz,  $J_2 = 1.7$  Hz, 1H), 7.66 (d,  $J = 8.0$  Hz, 2H), 7.45 (t,  $J = 7.4$  Hz, 2H), 7.39 (t,  $J = 7.4$  Hz, 1H), 7.37-7.35 (m, 1H), 7.33 (t,  $J = 7.5$  Hz, 1H), 7.23 (t,  $J = 7.8$  Hz, 2H), 7.16 (d,  $J = 8.3$  Hz, 2H);  $^{13}C$  NMR ( $CDCl_3$ , 150 MHz)  $\delta$  (ppm): 179.7, 159.3, 151.9, 139.6, 137.8, 134.1, 133.1, 130.9, 130.1, 129.5, 128.53, 128.45, 122.0, 119.7, 94.9, 88.5; MS (HRMS)  $m/z$  Calcd. for  $C_{20}H_{14}NO^+$  : 284.1070,  $[M+H]^+$  found : 284.1073.

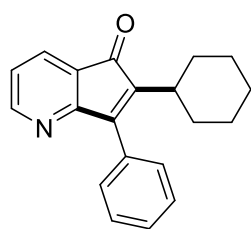

### 6-cyclohexyl-7-phenyl-5H-cyclopenta[b]pyridin-5-one (3a)

Yellow oil (56.3 mg, 78%);  $R_f = 0.40$  (petroleum ether/ethyl acetate = 10:1, v/v);  $^1\text{H}$  NMR ( $\text{CDCl}_3$ , 600 MHz)  $\delta$  (ppm): 8.43 (d,  $J = 5.2$  Hz, 1H), 7.65 (d,  $J = 7.1$  Hz, 1H), 7.57-7.52 (m, 4H), 7.48 (t,  $J = 7.2$  Hz, 1H), 7.09-7.07 (m, 1H), 2.70-2.65 (m, 1H), 1.96-1.89 (m, 2H), 1.81-1.77 (m, 2H), 1.68-1.63 (m, 2H), 1.35-1.22 (m, 4H);  $^{13}\text{C}$  NMR ( $\text{CDCl}_3$ , 150 MHz)  $\delta$  (ppm): 196.2, 167.2, 153.4, 151.9, 142.7, 131.3, 129.5, 129.0, 128.62, 128.55, 125.4, 122.1, 36.4, 31.0, 26.5, 25.8; MS (HRMS)  $m/z$  Calcd. for  $\text{C}_{20}\text{H}_{20}\text{NO}^+$  : 290.1539,  $[\text{M}+\text{H}]^+$  found : 290.1545.

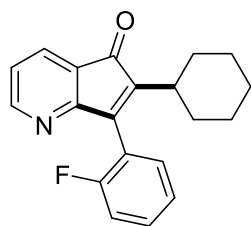

**6-cyclohexyl-7-(2-fluorophenyl)-5H-cyclopenta[b]pyridin-5-one (3b)**

Yellow oil (47.6 mg, 62%);  $R_f = 0.42$  (petroleum ether/ethyl acetate = 10:1, v/v);  $^1\text{H}$  NMR ( $\text{CDCl}_3$ , 600 MHz)  $\delta$  (ppm): 8.41 (d,  $J = 5.2$  Hz, 1H), 7.65 (d,  $J = 7.0$  Hz, 1H), 7.48-7.45 (m, 1H), 7.42 (t,  $J = 7.3$  Hz, 1H), 7.30 (t,  $J = 7.5$  Hz, 1H), 7.24 (t,  $J = 9.0$  Hz, 1H), 7.09-7.06 (m, 1H), 2.46-2.42 (m, 1H), 1.81-1.75 (m, 4H), 1.67-1.65 (m, 3H), 1.28-1.17 (m, 3H);  $^{13}\text{C}$  NMR ( $\text{CDCl}_3$ , 100 MHz)  $\delta$  (ppm): 195.7, 166.9, 159.7 (d,  $J = 247.4$  Hz), 152.3, 148.5, 145.0, 131.2 (d,  $J = 8.1$  Hz), 130.7 (d,  $J = 3.1$  Hz), 128.8, 124.9, 124.3 (d,  $J = 2.5$  Hz), 122.2, 119.5, 116.3 (d,  $J = 21.6$  Hz), 37.1, 30.7, 26.5, 25.8. MS (HRMS)  $m/z$  Calcd. for  $\text{C}_{20}\text{H}_{19}\text{FNO}^+$  : 308.1445,  $[\text{M}+\text{H}]^+$  found : 308.1442.

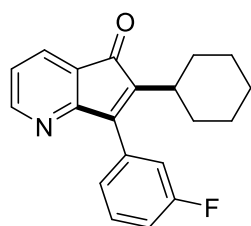

**6-cyclohexyl-7-(3-fluorophenyl)-5H-cyclopenta[b]pyridin-5-one (3c)**

Yellow oil (54.5 mg, 71%);  $R_f = 0.41$  (petroleum ether/ethyl acetate = 10:1, v/v);  $^1\text{H}$  NMR ( $\text{CDCl}_3$ , 400 MHz)  $\delta$  (ppm): 8.43 (d,  $J = 5.3$  Hz, 1H), 7.66 (d,  $J = 7.2$  Hz, 1H), 7.53-7.47 (m, 1H), 7.33-7.29 (m, 2H), 7.20-7.15 (m, 1H), 7.10 (t,  $J = 6.8$  Hz, 1H), 2.68-2.60 (m, 1H), 1.95-1.85 (m, 2H), 1.81-1.78 (m, 2H), 1.70-1.62 (m, 3H), 1.33-1.22 (m, 3H);  $^{13}\text{C}$  NMR ( $\text{CDCl}_3$ , 150 MHz)  $\delta$  (ppm): 195.9, 166.8, 162.7 (d,  $J =$

245.2 Hz), 152.0, 143.2, 133.3 (d,  $J = 8.1$  Hz), 130.2 (d,  $J = 8.4$  Hz), 128.9, 125.1, 124.8 (d,  $J = 3.4$  Hz), 122.3, 116.4 (d,  $J = 21.0$  Hz), 116.1 (d,  $J = 22.3$  Hz), 36.5, 31.0, 26.5, 25.7; MS (HRMS)  $m/z$  Calcd. for  $C_{20}H_{19}FNO^+$  : 308.1445,  $[M+H]^+$  found : 308.1440.

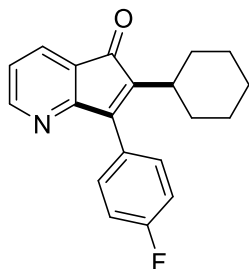

**6-cyclohexyl-7-(4-fluorophenyl)-5H-cyclopenta[b]pyridin-5-one (3d)**

Yellow oil (59.9 mg, 78%);  $R_f = 0.41$  (petroleum ether/ethyl acetate = 10:1, v/v);  $^1H$  NMR ( $CDCl_3$ , 400 MHz)  $\delta$  (ppm): 8.42 (d,  $J = 5.3$  Hz, 1H), 7.66 (d,  $J = 7.2$  Hz, 1H), 7.59-7.55 (m, 2H), 7.23 (t,  $J = 8.7$  Hz, 2H), 7.11-7.08 (m, 1H), 2.67-2.60 (m, 1H), 1.97-1.88 (m, 2H), 1.81-1.78 (m, 2H), 1.71-1.62 (m, 3H), 1.34-1.21 (m, 3H);  $^{13}C$  NMR ( $CDCl_3$ , 150 MHz)  $\delta$  (ppm): 196.0, 166.9, 163.4 (d,  $J = 248.4$  Hz), 152.2, 151.8, 142.6, 131.1 (d,  $J = 8.1$  Hz), 128.7, 127.2 (d,  $J = 3.4$  Hz), 125.3, 122.3, 115.8 (d,  $J = 21.5$  Hz), 36.5, 31.0, 26.5, 25.7; MS (HRMS)  $m/z$  Calcd. for  $C_{20}H_{19}FNO^+$  : 308.1445,  $[M+H]^+$  found : 308.1443.

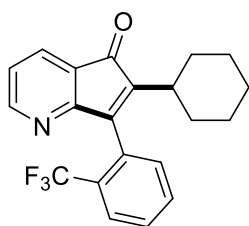

**6-cyclohexyl-7-(2-(trifluoromethyl)phenyl)-5H-cyclopenta[b]pyridin-5-one (3e)**

Yellow oil (61.6 mg, 69%);  $R_f = 0.40$  (petroleum ether/ethyl acetate = 10:1, v/v);  $^1H$  NMR ( $CDCl_3$ , 600 MHz)  $\delta$  (ppm): 8.36 (dd,  $J_1 = 5.3$  Hz,  $J_2 = 1.6$  Hz, 1H), 7.85 (d,  $J = 7.9$  Hz, 1H), 7.69-7.65 (m, 2H), 7.59 (t,  $J = 7.7$  Hz, 1H), 7.29 (d,  $J = 7.6$  Hz, 1H), 7.08-7.05 (m, 1H), 2.27-2.22 (m, 1H), 1.74-1.68 (m, 3H), 1.67-1.63 (m, 2H), 1.59-1.55 (m, 2H), 1.20-1.10 (m, 3H);  $^{13}C$  NMR ( $CDCl_3$ , 150 MHz)  $\delta$  (ppm): 195.6, 168.0, 152.9, 152.6, 144.5, 132.2, 130.8 (q,  $J = 10.9$  Hz), 129.8, 129.1, 128.9, 127.0

(q,  $J = 19.9$  Hz), 124.8, 124.2, 123.0, 122.2, 36.8, 31.0, 30.3, 26.44, 26.35, 25.7. MS (HRMS)  $m/z$  Calcd. for  $C_{21}H_{19}F_3NO^+$  : 358.1413,  $[M+H]^+$  found : 358.1415.

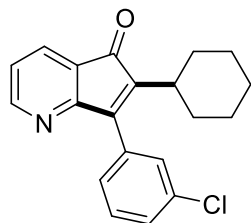

**7-(3-chlorophenyl)-6-cyclohexyl-5H-cyclopenta[b]pyridin-5-one (3f)**

Yellow oil (56.5 mg, 70%);  $R_f = 0.42$  (petroleum ether/ethyl acetate = 10:1, v/v);  $^1H$  NMR ( $CDCl_3$ , 400 MHz)  $\delta$  (ppm): 8.42 (d,  $J = 5.2$  Hz, 1H), 7.65 (d,  $J = 7.2$  Hz, 1H), 7.55 (s, 1H), 7.47-7.42 (m, 3H), 7.09 (t,  $J = 8.2$  Hz, 1H), 2.64-2.60 (m, 1H), 1.92-1.86 (m, 2H), 1.81-1.78 (m, 2H), 1.70-1.68 (m, 1H), 1.64-1.62 (m, 2H), 1.32-1.22 (m, 3H);  $^{13}C$  NMR ( $CDCl_3$ , 150 MHz)  $\delta$  (ppm): 195.8, 166.7, 152.0, 151.8, 143.3, 134.6, 133.0, 129.9, 129.6, 129.1, 128.1, 127.2, 125.0, 122.3, 36.5, 31.0, 26.5, 25.7; MS (HRMS)  $m/z$  Calcd. for  $C_{20}H_{19}ClNO^+$  : 324.1150,  $[M+H]^+$  found : 324.1153.

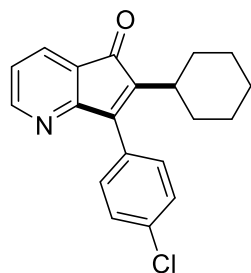

**7-(4-chlorophenyl)-6-cyclohexyl-5H-cyclopenta[b]pyridin-5-one (3g)**

Yellow oil (59.8 mg, 74%);  $R_f = 0.43$  (petroleum ether/ethyl acetate = 10:1, v/v);  $^1H$  NMR ( $CDCl_3$ , 600 MHz)  $\delta$  (ppm): 8.42 (d,  $J = 5.2$  Hz, 1H), 7.65 (d,  $J = 7.1$  Hz, 1H), 7.510-7.508 (m, 4H), 7.10-7.08 (m, 1H), 2.64-2.60 (m, 1H), 1.94-1.87 (m, 2H), 1.81-1.78 (m, 2H), 1.70-1.68 (m, 1H), 1.63-1.61 (m, 2H), 1.30-1.22 (m, 3H);  $^{13}C$  NMR ( $CDCl_3$ , 150 MHz)  $\delta$  (ppm): 195.9, 166.8, 152.1, 151.9, 142.9, 135.6, 130.4, 129.6, 128.9, 128.8, 125.2, 122.3, 36.5, 31.0, 26.5, 25.7; MS (HRMS)  $m/z$  Calcd. for  $C_{20}H_{19}ClNO^+$  : 324.1150,  $[M+H]^+$  found : 324.1144.

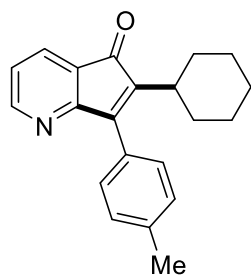

**6-cyclohexyl-7-(p-tolyl)-5H-cyclopenta[b]pyridin-5-one (3h)**

Yellow oil (60.6 mg, 80%);  $R_f = 0.42$  (petroleum ether/ethyl acetate = 10:1, v/v);  $^1\text{H}$  NMR ( $\text{CDCl}_3$ , 400 MHz)  $\delta$  (ppm): 8.42 (d,  $J = 5.3$  Hz, 1H), 7.63 (d,  $J = 7.2$  Hz, 1H), 7.48 (d,  $J = 7.9$  Hz, 2H), 7.34 (d,  $J = 7.9$  Hz, 2H), 7.08-7.05 (m, 1H), 2.72-2.65 (m, 1H), 2.44 (s, 3H), 1.98-1.88 (m, 2H), 1.80-1.77 (m, 2H), 1.70-1.62 (m, 3H), 1.31-1.21 (m, 3H);  $^{13}\text{C}$  NMR ( $\text{CDCl}_3$ , 100 MHz)  $\delta$  (ppm): 196.3, 167.2, 153.5, 151.8, 142.1, 139.7, 129.3, 129.0, 128.5, 128.3, 125.5, 122.1, 36.5, 31.0, 26.6, 25.8, 21.7; MS (HRMS)  $m/z$  Calcd. for  $\text{C}_{21}\text{H}_{22}\text{NO}^+$  : 304.1696,  $[\text{M}+\text{H}]^+$  found : 304.1700.

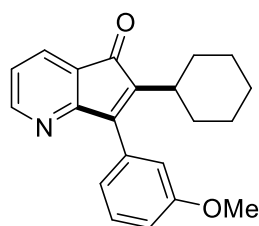

**6-cyclohexyl-7-(3-methoxyphenyl)-5H-cyclopenta[b]pyridin-5-one (3i)**

Yellow oil (58.2 mg, 73%);  $R_f = 0.43$  (petroleum ether/ethyl acetate = 10:1, v/v);  $^1\text{H}$  NMR ( $\text{CDCl}_3$ , 400 MHz)  $\delta$  (ppm): 8.44-8.42 (m, 1H), 7.64 (d,  $J = 7.2$  Hz, 1H), 7.45 (t,  $J = 8.0$  Hz, 1H), 7.14 (d,  $J = 7.6$  Hz, 1H), 7.10-7.06 (m, 2H), 7.02 (d,  $J = 8.3$  Hz, 1H), 3.87 (s, 3H), 2.72-2.65 (m, 1H), 1.96-1.87 (m, 2H), 1.80-1.77 (m, 2H), 1.70-1.62 (m, 3H), 1.34-1.21 (m, 3H);  $^{13}\text{C}$  NMR ( $\text{CDCl}_3$ , 150 MHz)  $\delta$  (ppm): 196.2, 167.1, 159.6, 153.3, 151.9, 142.8, 132.5, 129.7, 128.6, 125.3, 122.1, 121.3, 115.2, 114.5, 55.3, 36.5, 31.0, 26.5, 25.8; MS (HRMS)  $m/z$  Calcd. for  $\text{C}_{21}\text{H}_{22}\text{NO}_2^+$  : 320.1645,  $[\text{M}+\text{H}]^+$  found : 320.1648.

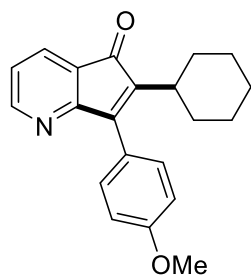

**6-cyclohexyl-7-(p-tolyl)-5H-cyclopenta[b]pyridin-5-one (3j)**

Yellow solid (59.1 mg, 74%);  $R_f = 0.41$  (petroleum ether/ethyl acetate = 10:1, v/v);  $^1\text{H}$  NMR ( $\text{CDCl}_3$ , 400 MHz)  $\delta$  (ppm): 8.43-8.41 (m, 1H), 7.62 (d,  $J = 7.2$  Hz, 1H), 7.57 (d,  $J = 8.7$  Hz, 2H), 7.08-7.05 (m, 3H), 3.88 (s, 3H), 2.73-2.66 (m, 1H), 2.00-1.91 (m, 2H), 1.81-1.78 (m, 2H), 1.70-1.62 (m, 3H), 1.34-1.22 (m, 3H);  $^{13}\text{C}$  NMR ( $\text{CDCl}_3$ , 150 MHz)  $\delta$  (ppm): 196.3, 167.1, 160.7, 153.0, 151.6, 141.6, 130.7, 128.4, 125.6, 123.5, 122.1, 114.1, 55.4, 36.5, 31.0, 26.6, 25.8; MS (HRMS)  $m/z$  Calcd. for  $\text{C}_{21}\text{H}_{22}\text{NO}_2^+$  : 320.1645,  $[\text{M}+\text{H}]^+$  found : 320.1646.

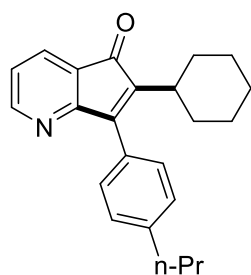

**6-cyclohexyl-7-(4-propylphenyl)-5H-cyclopenta[b]pyridin-5-one (3k)**

Yellow oil (56.3 mg, 68%);  $R_f = 0.41$  (petroleum ether/ethyl acetate = 10:1, v/v);  $^1\text{H}$  NMR ( $\text{CDCl}_3$ , 600 MHz)  $\delta$  (ppm): 8.43-8.41 (m, 1H), 7.63 (d,  $J = 7.2$  Hz, 1H), 7.50 (d,  $J = 8.0$  Hz, 2H), 7.34 (d,  $J = 7.9$  Hz, 2H), 7.07 (t,  $J = 6.2$  Hz, 1H), 2.71-2.65 (m, 3H), 1.97-1.91 (m, 2H), 1.80-1.78 (m, 2H), 1.73-1.70 (m, 3H), 1.65-1.63 (m, 2H), 1.29-1.20 (m, 2H), 1.01 (t,  $J = 7.3$  Hz, 3H);  $^{13}\text{C}$  NMR ( $\text{CDCl}_3$ , 100 MHz)  $\delta$  (ppm): 196.3, 167.2, 153.4, 151.8, 144.5, 142.2, 129.0, 128.7, 128.49, 128.48, 125.5, 122.1, 38.2, 36.5, 31.0, 26.5, 25.8, 24.4, 14.1; MS (HRMS)  $m/z$  Calcd. for  $\text{C}_{23}\text{H}_{26}\text{NO}^+$  : 332.2009,  $[\text{M}+\text{H}]^+$  found : 332.2016.

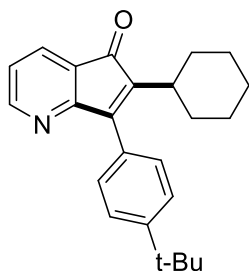

**7-(4-(tert-butyl)phenyl)-6-cyclohexyl-5H-cyclopenta[b]pyridin-5-one (31)**

Yellow oil (57.8 mg, 70%);  $R_f = 0.42$  (petroleum ether/ethyl acetate = 10:1, v/v);  $^1\text{H}$  NMR ( $\text{CDCl}_3$ , 600 MHz)  $\delta$  (ppm): 8.44 (dd,  $J_1 = 5.2$  Hz,  $J_2 = 1.5$  Hz, 1H), 7.63 (dd,  $J_1 = 7.2$  Hz,  $J_2 = 1.6$  Hz, 1H), 7.56-7.53 (m, 4H), 7.08-7.06 (m, 1H), 2.74-2.69 (m, 1H), 2.00-1.93 (m, 2H), 1.81-1.78 (m, 2H), 1.70-1.68 (m, 1H), 1.67-1.63 (m, 2H), 1.39 (s, 9H), 1.33-1.29 (m, 3H);  $^{13}\text{C}$  NMR ( $\text{CDCl}_3$ , 150 MHz)  $\delta$  (ppm): 196.3, 167.1, 153.2, 152.7, 151.7, 142.2, 128.8, 128.5, 128.2, 125.59, 125.55, 122.1, 36.5, 35.0, 31.3, 31.0, 26.5, 25.8; MS (HRMS)  $m/z$  Calcd. for  $\text{C}_{24}\text{H}_{28}\text{NO}^+$  : 346.2165,  $[\text{M}+\text{H}]^+$  found : 346.2162.

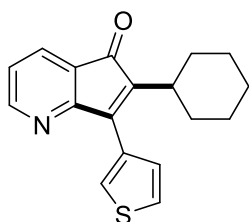

**6-cyclohexyl-7-(thiophen-3-yl)-5H-cyclopenta[b]pyridin-5-one (3m)**

Yellow oil (53.1 mg, 72%);  $R_f = 0.40$  (petroleum ether/ethyl acetate = 10:1, v/v);  $^1\text{H}$  NMR ( $\text{CDCl}_3$ , 600 MHz)  $\delta$  (ppm): 8.46 (d,  $J = 5.2$  Hz, 1H), 8.07 (s, 1H), 7.64 (d,  $J = 7.2$  Hz, 1H), 7.52-7.51 (m, 1H), 7.50-7.49 (m, 1H), 7.11-7.09 (m, 1H), 2.87-2.83 (m, 1H), 2.04-1.97 (m, 2H), 1.85-1.83 (m, 2H), 1.74-1.72 (m, 1H), 1.68-1.66 (m, 2H), 1.36-1.31 (m, 3H);  $^{13}\text{C}$  NMR ( $\text{CDCl}_3$ , 150 MHz)  $\delta$  (ppm): 196.1, 166.7, 151.6, 147.4, 141.3, 131.7, 128.6, 128.4, 128.3, 125.8, 125.7, 122.2, 37.1, 30.8, 26.7, 25.8; MS (HRMS)  $m/z$  Calcd. for  $\text{C}_{18}\text{H}_{18}\text{NOS}^+$  : 296.1104,  $[\text{M}+\text{H}]^+$  found : 296.1100.

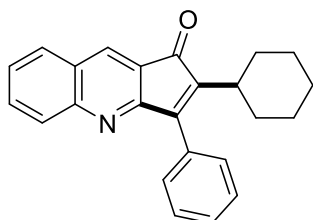

### 2-cyclohexyl-3-phenyl-1H-cyclopenta[b]quinolin-1-one (3n)

Yellow solid (62.7 mg, 74%);  $R_f = 0.38$  (petroleum ether/ethyl acetate = 10:1, v/v);  $^1\text{H}$  NMR ( $\text{CDCl}_3$ , 600 MHz)  $\delta$  (ppm): 8.93 (s, 1H), 8.03 (d,  $J = 8.5$  Hz, 1H), 7.65-7.62 (m, 1H), 7.58-7.56 (m, 3H), 7.39-7.37 (m, 2H), 7.20-7.17 (m, 1H), 7.06 (d,  $J = 8.7$  Hz, 1H), 2.39-2.34 (m, 1H), 1.75-1.72 (m, 3H), 1.65-1.58 (m, 5H), 1.23-1.14 (m, 2H);  $^{13}\text{C}$  NMR ( $\text{CDCl}_3$ , 150 MHz)  $\delta$  (ppm): 198.1, 153.51, 153.47, 153.2, 142.3, 141.6, 134.9, 131.5, 130.6, 129.1, 128.9, 128.2, 127.0, 125.0, 122.7, 120.1, 36.0, 31.2, 26.5, 25.7; MS (HRMS)  $m/z$  Calcd. for  $\text{C}_{24}\text{H}_{22}\text{NO}^+$  : 340.1696,  $[\text{M}+\text{H}]^+$  found : 340.1700.

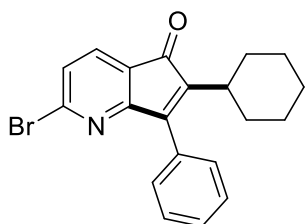

### 2-bromo-6-cyclohexyl-7-phenyl-5H-cyclopenta[b]pyridin-5-one (3o)

Yellow oil (73.4 mg, 80%);  $R_f = 0.65$  (petroleum ether/ethyl acetate = 10:1, v/v);  $^1\text{H}$  NMR ( $\text{CDCl}_3$ , 600 MHz)  $\delta$  (ppm): 7.58 (d,  $J = 7.1$  Hz, 2H), 7.53 (t,  $J = 7.4$  Hz, 2H), 7.50-7.48 (m, 2H), 7.32 (d,  $J = 7.6$  Hz, 1H), 2.72-2.67 (m, 1H), 1.96-1.89 (m, 2H), 1.81-1.77 (m, 2H), 1.70-1.63 (m, 3H), 1.34-1.21 (m, 3H);  $^{13}\text{C}$  NMR ( $\text{CDCl}_3$ , 150 MHz)  $\delta$  (ppm): 195.1, 168.3, 152.1, 145.6, 143.4, 130.5, 130.4, 129.8, 129.2, 128.5, 126.1, 123.9, 36.6, 31.0, 26.5, 25.7; MS (HRMS)  $m/z$  Calcd. for  $\text{C}_{20}\text{H}_{19}\text{BrNO}^+$  : 368.0645,  $[\text{M}+\text{H}]^+$  found : 368.0649.

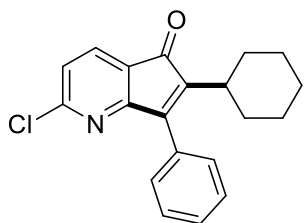

### 2-chloro-6-cyclohexyl-7-phenyl-5H-cyclopenta[b]pyridin-5-one (3p)

Yellow oil (63.4 mg, 79%);  $R_f = 0.63$  (petroleum ether/ethyl acetate = 10:1, v/v);  $^1\text{H}$  NMR ( $\text{CDCl}_3$ , 400 MHz)  $\delta$  (ppm): 7.60-7.48 (m, 6H), 7.14 (d,  $J = 7.6$  Hz, 1H), 2.73-2.66 (m, 1H), 1.97-1.88 (m, 2H), 1.81-1.78 (m, 2H), 1.70-1.62 (m, 3H), 1.34-1.21 (m, 3H);  $^{13}\text{C}$  NMR ( $\text{CDCl}_3$ , 150 MHz)  $\delta$  (ppm): 194.9, 168.2, 154.6, 152.1,



143.5, 130.7, 130.5, 129.8, 129.2, 128.6, 123.7, 122.2, 36.6, 30.9, 26.5, 25.7; MS (HRMS)  $m/z$  Calcd. for  $C_{20}H_{19}ClNO^+$  : 324.1150,  $[M+H]^+$  found : 324.1153.

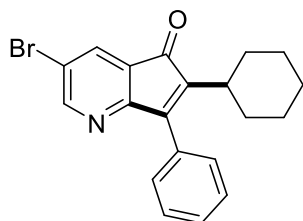

**3-bromo-6-cyclohexyl-7-phenyl-5H-cyclopenta[b]pyridin-5-one (3q)**

Yellow oil (67.8 mg, 76%);  $R_f$  = 0.45 (petroleum ether/ethyl acetate = 10:1, v/v);  $^1H$  NMR ( $CDCl_3$ , 600 MHz)  $\delta$  (ppm): 8.49 (s, 1H), 7.75 (s, 1H), 7.54-7.53 (m, 4H), 7.51-7.48 (m, 1H), 2.68-2.63 (m, 1H), 1.93-1.86 (m, 2H), 1.80-1.78 (m, 2H), 1.70-1.68 (m, 1H), 1.64-1.62 (m, 2H), 1.30-1.25 (m, 3H);  $^{13}C$  NMR ( $CDCl_3$ , 150 MHz)  $\delta$  (ppm): 194.7, 165.1, 153.3, 152.3, 143.0, 131.5, 130.7, 129.8, 128.9, 128.6, 126.7, 119.7, 36.5, 30.9, 26.4, 25.7; MS (HRMS)  $m/z$  Calcd. for  $C_{20}H_{19}BrNO^+$  : 368.0645,  $[M+H]^+$  found : 368.0649.

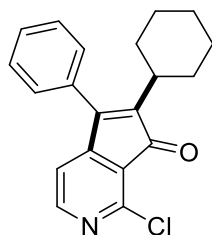

**1-chloro-6-cyclohexyl-5-phenyl-7H-cyclopenta[c]pyridin-7-one (3r)**

Yellow oil (55.7 mg, 69%);  $R_f$  = 0.32 (petroleum ether/ethyl acetate = 10:1, v/v);  $^1H$  NMR ( $CDCl_3$ , 400 MHz)  $\delta$  (ppm): 8.54-8.53 (m, 1H), 7.62 (d,  $J$  = 7.6 Hz, 1H), 7.48 (d,  $J$  = 7.0 Hz, 1H), 7.42-7.39 (m, 1H), 7.30-7.28 (m, 1H), 7.21 (t,  $J$  = 7.0 Hz, 1H), 6.61 (d,  $J$  = 7.1 Hz, 1H), 2.32-2.23 (m, 1H), 1.72-1.63 (m, 5H), 1.31-1.24 (m, 2H), 1.21-1.14 (m, 3H);  $^{13}C$  NMR ( $CDCl_3$ , 150 MHz)  $\delta$  (ppm): 194.0, 157.7, 155.5, 150.9, 145.0, 142.3, 131.6, 129.7, 129.2, 127.9, 120.8, 115.1, 36.3, 30.9, 26.4, 25.7; MS (HRMS)  $m/z$  Calcd. for  $C_{20}H_{19}ClNO^+$  : 324.1150,  $[M+H]^+$  found : 324.1154.

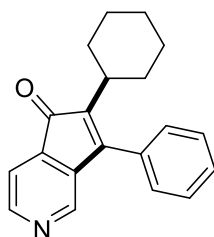

**6-cyclohexyl-7-phenyl-5H-cyclopenta[c]pyridin-5-one (3s)**

Yellow oil (56.4 mg, 78%);  $R_f = 0.40$  (petroleum ether/ethyl acetate = 10:1, v/v);  $^1\text{H}$  NMR ( $\text{CDCl}_3$ , 600 MHz)  $\delta$  (ppm): 8.67 (s, 1H), 8.26 (s, 1H), 7.56 (t,  $J = 7.3$  Hz, 2H), 7.51 (t,  $J = 7.4$  Hz, 1H), 7.43 (d,  $J = 6.9$  Hz, 2H), 7.33-7.32 (m, 1H), 2.57-2.52 (m, 1H), 1.89-1.84 (m, 2H), 1.78-1.75 (m, 2H), 1.68-1.65 (m, 1H), 1.60-1.58 (m, 2H), 1.29-1.19 (m, 3H);  $^{13}\text{C}$  NMR ( $\text{CDCl}_3$ , 150 MHz)  $\delta$  (ppm): 197.2, 155.4, 152.1, 140.4, 140.0, 137.7, 132.3, 129.7, 129.1, 127.8, 115.7, 36.0, 31.0, 26.5, 25.7; MS (HRMS)  $m/z$  Calcd. for  $\text{C}_{20}\text{H}_{20}\text{NO}^+$ : 290.1539,  $[\text{M}+\text{H}]^+$  found : 290.1543.

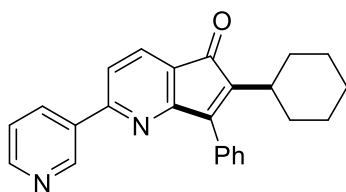

**6-cyclohexyl-7-phenyl-2-(pyridin-3-yl)-5H-cyclopenta[b]pyridin-5-one (3t)**

White solid (73.2 mg, 80%);  $R_f = 0.30$  (petroleum ether/ethyl acetate = 3:1, v/v);  $^1\text{H}$  NMR ( $\text{CDCl}_3$ , 600 MHz)  $\delta$  (ppm): 9.24 (s, 1H), 8.64-8.63 (m, 1H), 8.29 (td,  $J_1 = 8.0$  Hz,  $J_2 = 2.0$  Hz, 1H), 7.74 (d,  $J = 7.5$  Hz, 1H), 7.69-7.67 (m, 2H), 7.58-7.55 (m, 3H), 7.52-7.49 (m, 1H), 7.38-7.36 (m, 1H), 2.78-2.73 (m, 1H), 2.01-1.95 (m, 2H), 1.82-1.80 (m, 3H), 1.71-1.66 (m, 2H), 1.36-1.31 (m, 1H), 1.29-1.23 (m, 2H);  $^{13}\text{C}$  NMR ( $\text{CDCl}_3$ , 150 MHz)  $\delta$  (ppm): 195.8, 167.6, 156.8, 152.6, 150.4, 148.5, 143.6, 134.4, 134.2, 131.1, 129.6, 129.44, 129.42, 128.4, 124.4, 123.6, 118.3, 36.7, 31.0, 26.5, 25.8; MS (HRMS)  $m/z$  Calcd. for  $\text{C}_{25}\text{H}_{23}\text{N}_2\text{O}^+$  : 367.1805,  $[\text{M}+\text{H}]^+$  found : 367.1806.

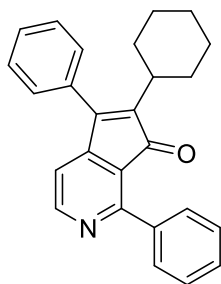

**6-cyclohexyl-1,5-diphenyl-7H-cyclopenta[c]pyridin-7-one (3u)**

Yellow solid (59.3 mg, 65%);  $R_f = 0.34$  (petroleum ether/ethyl acetate = 10:1, v/v);  $^1\text{H}$  NMR ( $\text{CDCl}_3$ , 600 MHz)  $\delta$  (ppm): 8.64 (d,  $J = 4.6$  Hz, 1H), 7.87-7.86 (m, 2H), 7.56 (t,  $J = 7.2$  Hz, 2H), 7.52-7.48 (m, 4H), 7.39 (d,  $J = 8.4$  Hz, 2H), 6.89 (d,  $J = 4.7$  Hz, 1H), 2.59-2.54 (m, 1H), 1.87-1.82 (m, 2H), 1.75-1.73 (m, 2H), 1.66-1.63 (m, 1H), 1.60-1.58 (m, 2H), 1.24-1.16 (m, 3H);  $^{13}\text{C}$  NMR ( $\text{CDCl}_3$ , 150 MHz)  $\delta$  (ppm): 196.5, 155.9, 155.0, 154.4, 151.6, 141.5, 136.9, 132.1, 129.7, 129.4, 129.0, 128.1, 127.9, 120.6, 114.5, 36.3, 30.9, 26.5, 25.7; MS (HRMS)  $m/z$  Calcd. for  $\text{C}_{26}\text{H}_{24}\text{NO}^+$  : 366.1852,  $[\text{M}+\text{H}]^+$  found : 366.1853.

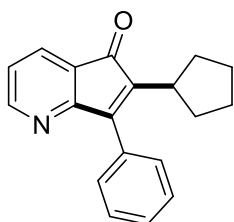

**6-cyclopentyl-7-phenyl-5H-cyclopenta[b]pyridin-5-one (4a)**

Yellow oil (55.0 mg, 80%);  $R_f = 0.41$  (petroleum ether/ethyl acetate = 10:1, v/v);  $^1\text{H}$  NMR ( $\text{CDCl}_3$ , 600 MHz)  $\delta$  (ppm): 8.43 (d,  $J = 5.2$  Hz, 1H), 7.64 (d,  $J = 7.3$  Hz, 1H), 7.60 (d,  $J = 7.3$  Hz, 2H), 7.53 (t,  $J = 7.6$  Hz, 2H), 7.47 (t,  $J = 7.3$  Hz, 1H), 7.09-7.06 (m, 1H), 3.07-3.01 (m, 1H), 1.97-1.89 (m, 4H), 1.84-1.80 (m, 2H), 1.62-1.59 (m, 2H);  $^{13}\text{C}$  NMR ( $\text{CDCl}_3$ , 150 MHz)  $\delta$  (ppm): 196.1, 167.0, 153.9, 151.9, 141.6, 131.2, 129.5, 129.1, 128.6, 128.5, 125.6, 122.1, 36.7, 32.4, 26.6; MS (HRMS)  $m/z$  Calcd. for  $\text{C}_{19}\text{H}_{18}\text{NO}^+$  : 276.1383,  $[\text{M}+\text{H}]^+$  found : 276.1387.

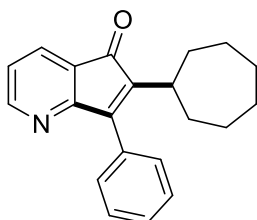

### 6-cycloheptyl-7-phenyl-5H-cyclopenta[b]pyridin-5-one (4b)

Yellow oil (56.1 mg, 74%);  $R_f = 0.40$  (petroleum ether/ethyl acetate = 10:1, v/v);  $^1\text{H}$  NMR ( $\text{CDCl}_3$ , 400 MHz)  $\delta$  (ppm): 8.43-8.42 (m, 1H), 7.64 (d,  $J = 7.2$  Hz, 1H), 7.58-7.56 (m, 2H), 7.53 (t,  $J = 7.6$  Hz, 2H), 7.47 (t,  $J = 7.4$  Hz, 1H), 7.09-7.07 (m, 1H), 2.83-2.78 (m, 1H), 2.02-1.95 (m, 2H), 1.82-1.78 (m, 2H), 1.72-1.68 (m, 2H), 1.61-1.57 (m, 4H), 1.46-1.41 (m, 2H);  $^{13}\text{C}$  NMR ( $\text{CDCl}_3$ , 100 MHz)  $\delta$  (ppm): 196.3, 167.4, 151.8, 151.7, 144.4, 131.3, 129.5, 129.1, 128.6, 128.5, 125.3, 122.1, 37.7, 33.4, 27.9, 27.8; MS (HRMS)  $m/z$  Calcd. for  $\text{C}_{21}\text{H}_{22}\text{NO}^+$ : 304.1696,  $[\text{M}+\text{H}]^+$  found : 304.1701.

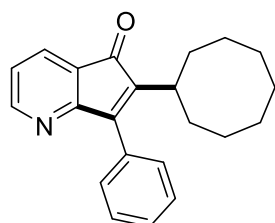

### 6-cyclooctyl-7-phenyl-5H-cyclopenta[b]pyridin-5-one (4c)

Yellow oil (57.9 mg, 73%);  $R_f = 0.41$  (petroleum ether/ethyl acetate = 10:1, v/v);  $^1\text{H}$  NMR ( $\text{CDCl}_3$ , 600 MHz)  $\delta$  (ppm): 8.42 (d,  $J = 5.2$  Hz, 1H), 7.64 (d,  $J = 7.2$  Hz, 1H), 7.58 (d,  $J = 8.5$  Hz, 2H), 7.53 (t,  $J = 7.6$  Hz, 2H), 7.47 (t,  $J = 7.4$  Hz, 1H), 7.09-7.07 (m, 1H), 2.95-2.90 (m, 1H), 2.04-1.99 (m, 2H), 1.80-1.75 (m, 2H), 1.66-1.61 (m, 3H), 1.57-1.53 (m, 4H), 1.48-1.44 (m, 3H);  $^{13}\text{C}$  NMR ( $\text{CDCl}_3$ , 150 MHz)  $\delta$  (ppm): 196.3, 167.4, 151.8, 151.5, 145.2, 131.2, 129.5, 129.0, 128.6, 128.5, 125.3, 122.1, 35.1, 32.3, 26.5, 26.4, 26.3; MS (HRMS)  $m/z$  Calcd. for  $\text{C}_{21}\text{H}_{22}\text{NO}^+$  : 318.1852,  $[\text{M}+\text{H}]^+$  found : 318.1856.

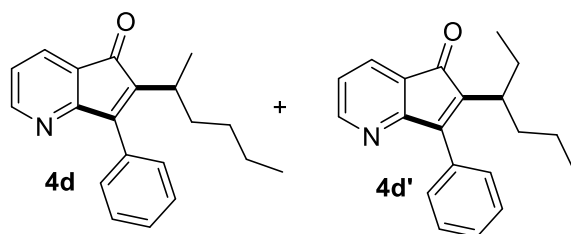

### (S)-6-(hexan-2-yl)-7-phenyl-5H-cyclopenta[b]pyridin-5-one(4d)/(S)-6-(hexan-3-yl)-7-phenyl-5H-cyclopenta[b]pyridin-5-one (4d')

Yellow oil (50.9 mg, 70%);  $R_f = 0.40$  (petroleum ether/ethyl acetate = 10:1, v/v);  $^1\text{H}$  NMR ( $\text{CDCl}_3$ , 600 MHz)  $\delta$  (ppm): 8.43 (d,  $J = 5.1$  Hz, 1H), 7.65 (d,  $J = 7.1$  Hz, 1H),

7.55-7.51 (m, 4H), 7.47-7.45 (m, 1H), 7.10-7.08 (m, 1H), 2.88-2.82 (m, 0.6H), 2.68-2.63 (m, 0.4H), 1.84-1.76 (m, 2.5H), 1.68-1.63 (m, 0.5H), 1.61-1.53 (m, 1.3H), 1.30 (d,  $J = 7.0$  Hz, 1.8H), 1.22-1.15 (m, 2.9H), 0.86 (t,  $J = 7.5$  Hz, 1.8H), 0.81 (t,  $J = 6.9$  Hz, 1.2H), 0.79 (t,  $J = 7.4$  Hz, 1.2H);  $^{13}\text{C}$  NMR ( $\text{CDCl}_3$ , 100 MHz)  $\delta$  (ppm): 196.4, 196.2, 167.3, 167.2, 155.9, 154.2, 152.0, 151.9, 142.7, 141.4, 131.3, 131.2, 131.0, 129.5, 129.3, 128.93, 128.86, 128.74, 128.65, 128.64, 128.54, 128.53, 125.4, 125.3, 122.2, 38.5, 36.0, 34.9, 31.3, 30.5, 27.0, 22.7, 21.5, 19.8, 14.2, 14.1, 12.9; MS (HRMS)  $m/z$  Calcd. for  $\text{C}_{20}\text{H}_{22}\text{NO}^+$  : 292.1696,  $[\text{M}+\text{H}]^+$  found : 292.1690.

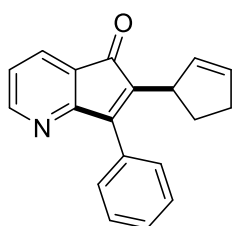

**(R)-6-(cyclopent-2-en-1-yl)-7-phenyl-5H-cyclopenta[b]pyridin-5-one (4e)**

Yellow oil (45.9 mg, 67%);  $R_f = 0.40$  (petroleum ether/ethyl acetate = 10:1, v/v);  $^1\text{H}$  NMR ( $\text{CDCl}_3$ , 600 MHz)  $\delta$  (ppm): 8.44 (dd,  $J_1 = 5.3$  Hz,  $J_2 = 1.6$  Hz, 1H), 7.65 (dd,  $J_1 = 7.2$  Hz,  $J_2 = 1.5$  Hz, 1H), 7.61 (d,  $J = 8.5$  Hz, 2H), 7.52 (t,  $J = 7.5$  Hz, 2H), 7.47 (t,  $J = 7.4$  Hz, 1H), 7.11-7.08 (m, 1H), 5.89-5.87 (m, 1H), 5.61-5.59 (m, 1H), 4.00-3.97 (m, 1H), 2.69-2.63 (m, 1H), 2.43-2.39 (m, 1H), 2.23-2.18 (m, 1H), 2.05-2.00 (m, 1H);  $^{13}\text{C}$  NMR ( $\text{CDCl}_3$ , 150 MHz)  $\delta$  (ppm): 195.8, 167.1, 154.1, 151.9, 140.1, 132.4, 131.7, 131.0, 129.7, 129.3, 128.7, 128.4, 125.4, 122.3, 41.9, 33.0, 30.0; MS (HRMS)  $m/z$  Calcd. for  $\text{C}_{19}\text{H}_{16}\text{NO}^+$  : 274.1226,  $[\text{M}+\text{H}]^+$  found : 274.1223.

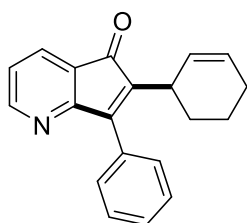

**(R)-6-(cyclohex-2-en-1-yl)-7-phenyl-5H-cyclopenta[b]pyridin-5-one (4f)**

Yellow oil (48.8 mg, 68%);  $R_f = 0.40$  (petroleum ether/ethyl acetate = 10:1, v/v);  $^1\text{H}$  NMR ( $\text{CDCl}_3$ , 600 MHz)  $\delta$  (ppm): 8.44 (dd,  $J_1 = 5.2$  Hz,  $J_2 = 1.6$  Hz, 1H), 7.67 (dd,  $J_1 = 7.2$  Hz,  $J_2 = 1.6$  Hz, 1H), 7.59 (d,  $J = 7.1$  Hz, 2H), 7.51 (t,  $J = 7.4$  Hz, 2H), 7.46 (t,  $J = 8.0$  Hz, 1H), 7.11-7.09 (m, 1H), 5.79-5.75 (m, 1H), 5.50-5.48 (m, 1H), 3.57-3.52

(m, 1H), 2.17-2.12 (m, 1H), 2.06-2.01 (m, 1H), 1.97-1.92 (m, 1H), 1.89-1.83 (m, 2H), 1.61-1.56 (m, 1H);  $^{13}\text{C}$  NMR ( $\text{CDCl}_3$ , 150 MHz)  $\delta$  (ppm): 195.8, 167.2, 154.5, 151.9, 141.2, 131.0, 129.7, 129.2, 128.8, 128.4, 128.2, 128.0, 125.3, 122.3, 33.3, 28.4, 24.7, 22.5; MS (HRMS)  $m/z$  Calcd. for  $\text{C}_{20}\text{H}_{18}\text{NO}^+$  : 288.1383,  $[\text{M}+\text{H}]^+$  found : 288.1380.

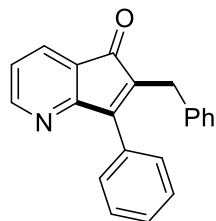

#### 6-benzyl-7-phenyl-5H-cyclopenta[b]pyridin-5-one (4g)

Yellow oil (8.9 mg, 12%);  $R_f$  = 0.38 (petroleum ether/ethyl acetate = 10:1, v/v);  $^1\text{H}$  NMR ( $\text{CDCl}_3$ , 600 MHz)  $\delta$  (ppm): 8.50-8.49 (m, 1H), 7.72 (dd,  $J_1$  = 7.2 Hz,  $J_2$  = 1.6 Hz, 1H), 7.70-7.68 (m, 2H), 7.53-7.48 (m, 3H), 7.33-7.30 (m, 1H), 7.27-7.26 (m, 1H), 7.21-7.19 (m, 3H), 7.15-7.13 (m, 1H), 3.87 (s, 2H);  $^{13}\text{C}$  NMR ( $\text{CDCl}_3$ , 100 MHz)  $\delta$  (ppm): 195.9, 167.4, 154.8, 151.9, 138.8, 136.7, 130.9, 130.0, 129.11, 129.06, 128.71, 128.66, 128.5, 126.4, 125.3, 122.4, 29.3; MS (HRMS)  $m/z$  Calcd. for  $\text{C}_{21}\text{H}_{16}\text{NO}^+$ : 298.1226,  $[\text{M}+\text{H}]^+$  found : 298.1224.

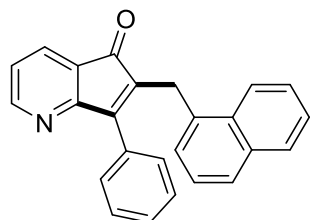

#### 6-(naphthalen-1-ylmethyl)-7-phenyl-5H-cyclopenta[b]pyridin-5-one (4h)

Yellow oil (22.6 mg, 26%);  $R_f$  = 0.39 (petroleum ether/ethyl acetate = 10:1, v/v);  $^1\text{H}$  NMR ( $\text{CDCl}_3$ , 600 MHz)  $\delta$  (ppm): 8.53 (dd,  $J_1$  = 5.3 Hz,  $J_2$  = 1.3 Hz, 1H), 7.92 (d,  $J$  = 8.2 Hz, 1H), 7.87 (d,  $J$  = 7.9 Hz, 1H), 7.75 (d,  $J$  = 7.3 Hz, 2H), 7.70-7.68 (m, 2H), 7.50 (t,  $J$  = 6.8 Hz, 1H), 7.47 (t,  $J$  = 7.6 Hz, 1H), 7.44-7.43 (m, 3H), 7.36 (t,  $J$  = 7.7 Hz, 1H), 7.28-7.27 (m, 1H), 7.18-7.16 (m, 1H), 4.31 (s, 2H);  $^{13}\text{C}$  NMR ( $\text{CDCl}_3$ , 100 MHz)  $\delta$  (ppm): 195.8, 167.3, 155.5, 151.9, 136.2, 134.4, 133.9, 131.9, 130.8, 130.2, 129.2, 129.0, 128.8, 128.7, 127.3, 126.1, 125.8, 125.63, 125.60, 125.5, 123.6, 122.4, 26.7; MS (HRMS)  $m/z$  Calcd. for  $\text{C}_{25}\text{H}_{18}\text{NO}^+$ : 348.1383,  $[\text{M}+\text{H}]^+$  found : 348.1387.

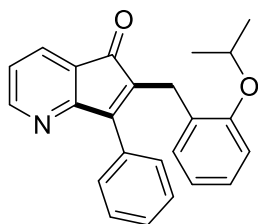

**6-(2-isopropoxybenzyl)-7-phenyl-5H-cyclopenta[b]pyridin-5-one (4i)**

Yellow oil (30.2 mg, 35%);  $R_f = 0.38$  (petroleum ether/ethyl acetate = 10:1, v/v);  $^1\text{H}$  NMR ( $\text{CDCl}_3$ , 600 MHz)  $\delta$  (ppm): 8.49 (dd,  $J_1 = 5.3$  Hz,  $J_2 = 1.6$  Hz, 1H), 7.71 (dd,  $J_1 = 7.1$  Hz,  $J_2 = 1.6$  Hz, 1H), 7.69-7.67 (m, 2H), 7.46-7.42 (m, 3H), 7.16-7.12 (m, 2H), 7.07 (d,  $J = 7.6$  Hz, 1H), 6.84 (d,  $J = 8.2$  Hz, 1H), 6.80 (d,  $J = 7.7$  Hz, 1H), 4.57-4.53 (m, 1H), 3.85 (s, 2H), 1.26 (d,  $J = 6.0$  Hz, 6H);  $^{13}\text{C}$  NMR ( $\text{CDCl}_3$ , 150 MHz)  $\delta$  (ppm): 195.9, 167.5, 155.5, 151.8, 137.1, 131.0, 129.8, 129.4, 129.3, 129.2, 128.9, 128.5, 128.0, 127.4, 125.6, 122.2, 120.2, 112.8, 70.1, 24.1, 22.2; MS (HRMS)  $m/z$  Calcd. for  $\text{C}_{24}\text{H}_{22}\text{NO}_2^+$ : 356.1645,  $[\text{M}+\text{H}]^+$  found : 356.1648.

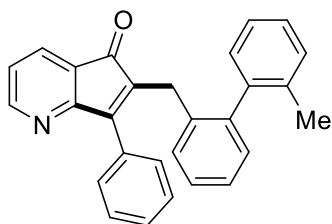

**6-((2'-methyl-[1,1'-biphenyl]-2-yl)methyl)-7-phenyl-5H-cyclopenta[b]pyridin-5-one (4j)**

Yellow oil (54.2 mg, 56%);  $R_f = 0.37$  (petroleum ether/ethyl acetate = 10:1, v/v);  $^1\text{H}$  NMR ( $\text{CDCl}_3$ , 600 MHz)  $\delta$  (ppm): 8.49 (dd,  $J_1 = 5.3$  Hz,  $J_2 = 1.6$  Hz, 1H), 7.68 (dd,  $J_1 = 7.2$  Hz,  $J_2 = 1.6$  Hz, 1H), 7.62-7.61 (m, 2H), 7.45-7.41 (m, 3H), 7.26-7.25 (m, 1H), 7.23-7.22 (m, 2H), 7.20-7.19 (m, 1H), 7.18-7.17 (m, 2H), 7.16-7.14 (m, 2H), 7.13-7.12 (m, 1H), 3.62 (d,  $J = 16.3$  Hz, 1H), 3.53 (d,  $J = 16.2$  Hz, 1H), 2.11 (s, 3H);  $^{13}\text{C}$  NMR ( $\text{CDCl}_3$ , 150 MHz)  $\delta$  (ppm): 195.4, 167.2, 154.9, 151.8, 141.4, 140.9, 136.60, 136.59, 136.1, 130.7, 130.1, 130.0, 129.8, 129.6, 129.03, 129.0, 128.5, 127.9, 127.6, 127.5, 126.4, 125.7, 125.4, 27.6, 20.0; MS (HRMS)  $m/z$  Calcd. for  $\text{C}_{28}\text{H}_{22}\text{NO}^+$ : 388.1696,  $[\text{M}+\text{H}]^+$  found : 388.1692.

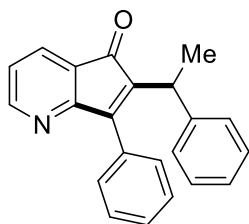

**(S)-7-phenyl-6-(1-phenylethyl)-5H-cyclopenta[b]pyridin-5-one (4k)**

Yellow oil (55.2 mg, 71%);  $R_f = 0.38$  (petroleum ether/ethyl acetate = 10:1, v/v);  $^1\text{H}$  NMR ( $\text{CDCl}_3$ , 600 MHz)  $\delta$  (ppm): 8.46 (d,  $J = 5.2$  Hz, 1H), 7.65 (d,  $J = 7.2$  Hz, 1H), 7.57 (d,  $J = 8.1$  Hz, 2H), 7.53 (t,  $J = 7.4$  Hz, 2H), 7.50-7.48 (m, 1H), 7.33 (d,  $J = 7.4$  Hz, 2H), 7.29 (t,  $J = 7.7$  Hz, 2H), 7.20 (t,  $J = 7.2$  Hz, 1H), 7.12-7.10 (m, 1H), 4.23 (q,  $J = 7.2$  Hz, 1H), 1.70 (d,  $J = 7.3$  Hz, 3H);  $^{13}\text{C}$  NMR ( $\text{CDCl}_3$ , 150 MHz)  $\delta$  (ppm): 195.8, 167.0, 154.5, 152.0, 143.5, 141.0, 130.9, 129.8, 129.0, 128.9, 128.7, 128.5, 127.7, 126.4, 125.2, 122.5, 36.0, 19.2; MS (HRMS)  $m/z$  Calcd. for  $\text{C}_{22}\text{H}_{18}\text{NO}^+$  : 312.1383,  $[\text{M}+\text{H}]^+$  found : 312.1388.

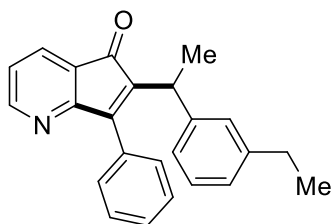

**(S)-6-(1-(3-ethylphenyl)ethyl)-7-phenyl-5H-cyclopenta[b]pyridin-5-one (4l)**

Yellow oil (60.2 mg, 71%);  $R_f = 0.40$  (petroleum ether/ethyl acetate = 10:1, v/v);  $^1\text{H}$  NMR ( $\text{CDCl}_3$ , 400 MHz)  $\delta$  (ppm): 8.45 (d,  $J = 5.1$  Hz, 1H), 7.66 (d,  $J = 7.2$  Hz, 1H), 7.58 (d,  $J = 7.0$  Hz, 2H), 7.54 (t,  $J = 7.4$  Hz, 2H), 7.50 (t,  $J = 7.3$  Hz, 1H), 7.22 (t,  $J = 7.8$  Hz, 1H), 7.17-7.15 (m, 2H), 7.11-7.09 (m, 1H), 7.05 (d,  $J = 7.4$  Hz, 1H), 4.23 (q,  $J = 7.2$  Hz, 1H), 2.64 (q,  $J = 7.6$  Hz, 2H), 1.70 (d,  $J = 7.3$  Hz, 3H), 1.24 (t,  $J = 7.6$  Hz, 3H);  $^{13}\text{C}$  NMR ( $\text{CDCl}_3$ , 150 MHz)  $\delta$  (ppm): 195.9, 167.1, 154.5, 152.0, 144.4, 143.5, 141.2, 131.0, 129.7, 129.0, 128.9, 128.6, 128.5, 127.3, 126.0, 125.2, 125.0, 122.4, 36.1, 29.0, 19.3, 15.7; MS (HRMS)  $m/z$  Calcd. for  $\text{C}_{24}\text{H}_{22}\text{NO}^+$  : 340.1696,  $[\text{M}+\text{H}]^+$  found : 340.1699.



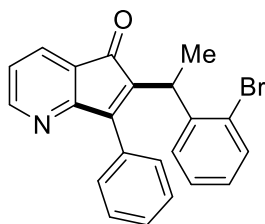

**(R)-6-(1-(2-bromophenyl)ethyl)-7-phenyl-5H-cyclopenta[b]pyridin-5-one (4m)**

Yellow oil (63.2 mg, 65%);  $R_f = 0.38$  (petroleum ether/ethyl acetate = 10:1, v/v);  $^1\text{H}$  NMR ( $\text{CDCl}_3$ , 600 MHz)  $\delta$  (ppm): 8.45 (d,  $J = 5.2$  Hz, 1H), 7.66 (d,  $J = 7.3$  Hz, 1H), 7.58 (d,  $J = 7.9$  Hz, 1H), 7.48-7.46 (m, 4H), 7.45-7.42 (m, 2H), 7.24 (t,  $J = 7.5$  Hz, 1H), 7.12-7.10 (m, 1H), 7.03 (t,  $J = 7.6$  Hz, 1H), 4.50 (q,  $J = 7.2$  Hz, 1H), 1.73 (d,  $J = 7.2$  Hz, 3H);  $^{13}\text{C}$  NMR ( $\text{CDCl}_3$ , 150 MHz)  $\delta$  (ppm): 195.9, 166.9, 155.4, 152.1, 142.2, 139.3, 132.8, 131.1, 129.9, 129.7, 128.93, 128.9, 128.5, 128.0, 127.4, 125.1, 124.4, 122.5, 36.1, 19.7; MS (HRMS)  $m/z$  Calcd. for  $\text{C}_{22}\text{H}_{17}\text{BrNO}^+$ : 390.0488,  $[\text{M}+\text{H}]^+$  found : 390.0494.

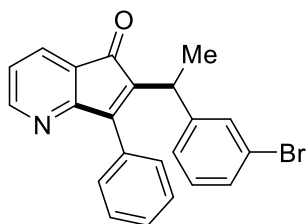

**(S)-6-(1-(3-bromophenyl)ethyl)-7-phenyl-5H-cyclopenta[b]pyridin-5-one (4n)**

Yellow oil (68.1 mg, 70%);  $R_f = 0.40$  (petroleum ether/ethyl acetate = 10:1, v/v);  $^1\text{H}$  NMR ( $\text{CDCl}_3$ , 600 MHz)  $\delta$  (ppm): 8.47 (d,  $J = 5.2$  Hz, 1H), 7.66 (d,  $J = 7.1$  Hz, 1H), 7.55-7.52 (m, 4H), 7.51-7.50 (m, 1H), 7.45 (s, 1H), 7.32 (d,  $J = 7.9$  Hz, 1H), 7.24 (d,  $J = 7.8$  Hz, 1H), 7.16-7.11 (m, 2H), 4.20 (q,  $J = 7.2$  Hz, 1H), 1.68 (d,  $J = 7.3$  Hz, 3H);  $^{13}\text{C}$  NMR ( $\text{CDCl}_3$ , 150 MHz)  $\delta$  (ppm): 195.6, 166.8, 154.9, 152.2, 145.8, 140.1, 130.8, 130.7, 130.0, 129.9, 129.6, 129.1, 128.9, 128.7, 126.4, 125.1, 122.64, 122.6, 35.7, 19.1; MS (HRMS)  $m/z$  Calcd. for  $\text{C}_{22}\text{H}_{17}\text{BrNO}^+$ : 390.0488,  $[\text{M}+\text{H}]^+$  found : 390.0490.

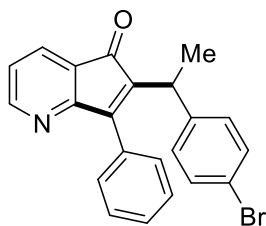

**(S)-6-(1-(4-bromophenyl)ethyl)-7-phenyl-5H-cyclopenta[b]pyridin-5-one (4o)**

Yellow oil (67.1 mg, 69%);  $R_f = 0.40$  (petroleum ether/ethyl acetate = 10:1, v/v);  $^1\text{H}$  NMR ( $\text{CDCl}_3$ , 400 MHz)  $\delta$  (ppm): 8.46 (d,  $J = 5.4$  Hz, 1H), 7.65 (d,  $J = 7.4$  Hz, 1H), 7.56-7.49 (m, 5H), 7.40 (d,  $J = 8.6$  Hz, 2H), 7.19 (d,  $J = 8.8$  Hz, 2H), 7.11 (t,  $J = 6.3$  Hz, 1H), 4.18 (q,  $J = 7.9$  Hz, 1H), 1.68 (d,  $J = 7.5$  Hz, 3H);  $^{13}\text{C}$  NMR ( $\text{CDCl}_3$ , 150 MHz)  $\delta$  (ppm): 195.7, 166.8, 154.8, 152.2, 142.5, 140.3, 131.6, 130.8, 129.9, 129.5, 129.0, 128.9, 128.7, 125.1, 122.6, 120.3, 35.6, 19.1; MS (HRMS)  $m/z$  Calcd. for  $\text{C}_{22}\text{H}_{17}\text{BrNO}^+$ : 390.0488,  $[\text{M}+\text{H}]^+$  found : 390.0490.

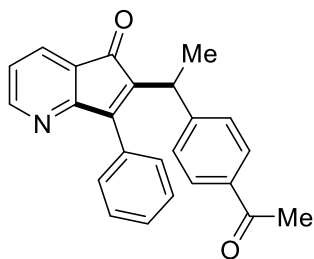

**(S)-6-(1-(4-acetylphenyl)ethyl)-7-phenyl-5H-cyclopenta[b]pyridin-5-one (4p)**

Yellow oil (61.8 mg, 70%);  $R_f = 0.34$  (petroleum ether/ethyl acetate = 10:1, v/v);  $^1\text{H}$  NMR ( $\text{CDCl}_3$ , 600 MHz)  $\delta$  (ppm): 8.47 (d,  $J = 5.2$  Hz, 1H), 7.88 (d,  $J = 8.3$  Hz, 2H), 7.65 (d,  $J = 7.2$  Hz, 1H), 7.57-7.50 (m, 5H), 7.40 (d,  $J = 8.3$  Hz, 2H), 7.13-7.11 (m, 1H), 4.28 (q,  $J = 7.2$  Hz, 1H), 2.57 (s, 3H), 1.72 (d,  $J = 7.2$  Hz, 3H);  $^{13}\text{C}$  NMR ( $\text{CDCl}_3$ , 150 MHz)  $\delta$  (ppm): 197.8, 195.6, 166.8, 155.1, 152.2, 149.0, 140.0, 135.5, 130.7, 130.0, 129.0, 128.9, 128.8, 128.7, 127.9, 125.1, 122.6, 36.0, 26.6, 19.0; MS (HRMS)  $m/z$  Calcd. for  $\text{C}_{24}\text{H}_{20}\text{NO}_2^+$ : 354.1489,  $[\text{M}+\text{H}]^+$  found : 354.1492.

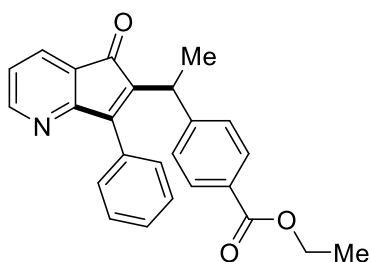

**ethyl (S)-4-(1-(5-oxo-7-phenyl-5H-cyclopenta[b]pyridin-6-yl)ethyl)benzoate (4q)**

Yellow oil (77.6 mg, 81%);  $R_f = 0.38$  (petroleum ether/ethyl acetate = 10:1, v/v);  $^1\text{H}$  NMR ( $\text{CDCl}_3$ , 400 MHz)  $\delta$  (ppm): 8.47 (d,  $J = 5.2$  Hz, 1H), 7.97 (d,  $J = 8.2$  Hz, 2H), 7.66 (d,  $J = 7.3$  Hz, 1H), 7.56-7.50 (m, 5H), 7.38 (d,  $J = 8.3$  Hz, 2H), 7.13-7.11 (m, 1H), 4.36 (q,  $J = 7.1$  Hz, 2H), 4.27 (q,  $J = 7.2$  Hz, 1H), 1.71 (d,  $J = 7.2$  Hz, 3H), 1.38 (t,  $J = 7.2$  Hz, 3H);  $^{13}\text{C}$  NMR ( $\text{CDCl}_3$ , 100 MHz)  $\delta$  (ppm): 195.6, 166.8, 166.6, 155.0, 152.2, 148.7, 140.1, 130.7, 130.0, 129.8, 129.0, 128.9, 128.75, 128.71, 127.6, 125.1, 122.6, 60.9, 36.0, 19.0, 14.4; MS (HRMS)  $m/z$  Calcd. for  $\text{C}_{25}\text{H}_{22}\text{NO}_3^+$ : 384.1594,  $[\text{M}+\text{H}]^+$  found : 384.1589.

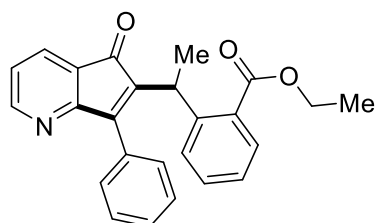

**ethyl (S)-2-(1-(5-oxo-7-phenyl-5H-cyclopenta[b]pyridin-6-yl)ethyl)benzoate (4r)**

Yellow oil (46.8 mg, 53%);  $R_f = 0.37$  (petroleum ether/ethyl acetate = 10:1, v/v);  $^1\text{H}$  NMR ( $\text{CDCl}_3$ , 600 MHz)  $\delta$  (ppm): 8.44-8.43 (m, 1H), 7.71-7.68 (m, 2H), 7.60 (d,  $J = 7.8$  Hz, 1H), 7.40-7.37 (m, 4H), 7.36-7.33 (m, 2H), 7.21 (d,  $J = 7.7$  Hz, 1H), 7.14-7.11 (m, 1H), 5.00 (q,  $J = 7.2$  Hz, 1H), 4.11 (q,  $J = 7.2$  Hz, 2H), 1.69 (d,  $J = 7.2$  Hz, 3H), 1.23 (t,  $J = 7.1$  Hz, 3H);  $^{13}\text{C}$  NMR ( $\text{CDCl}_3$ , 100 MHz)  $\delta$  (ppm): 196.3, 168.1, 166.9, 151.9, 144.5, 141.5, 131.7, 130.4, 130.2, 129.5, 129.1, 128.9, 128.4, 126.2, 125.2, 122.6, 61.0, 33.3, 20.5, 14.2; MS (HRMS)  $m/z$  Calcd. for  $\text{C}_{25}\text{H}_{22}\text{NO}_3^+$ : 384.1594,  $[\text{M}+\text{H}]^+$  found : 384.1592.

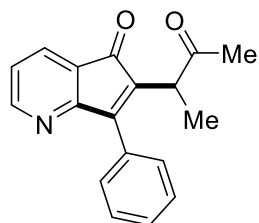

**(S)-6-(3-oxobutan-2-yl)-7-phenyl-5H-cyclopenta[b]pyridin-5-one (4s)**

Yellow oil (38.8 mg, 56%);  $R_f = 0.33$  (petroleum ether/ethyl acetate = 10:1, v/v);  $^1\text{H}$  NMR ( $\text{CDCl}_3$ , 400 MHz)  $\delta$  (ppm): 8.50 (d,  $J = 5.2$  Hz, 1H), 7.73 (d,  $J = 7.3$  Hz, 1H), 7.62 (d,  $J = 7.0$  Hz, 2H), 7.54 (t,  $J = 7.3$  Hz, 2H), 7.52-7.49 (m, 1H), 7.17-7.15 (m,

1H), 3.70 (q,  $J = 7.1$  Hz, 1H), 2.15 (s, 3H), 1.45 (d,  $J = 7.2$  Hz, 3H);  $^{13}\text{C}$  NMR ( $\text{CDCl}_3$ , 100 MHz)  $\delta$  (ppm): 206.9, 195.1, 166.9, 155.7, 152.2, 137.2, 130.3, 129.4, 129.3, 128.8, 128.7, 122.7, 44.2, 28.4, 15.5; MS (HRMS)  $m/z$  Calcd. for  $\text{C}_{18}\text{H}_{16}\text{NO}_2^+$  : 278.1176,  $[\text{M}+\text{H}]^+$  found : 278.1174.

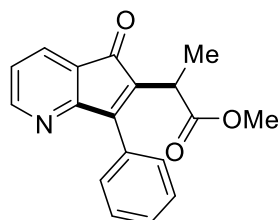

**methyl (R)-2-(5-oxo-7-phenyl-5H-cyclopenta[b]pyridin-6-yl)propanoate (4t)**

Yellow oil (39.6 mg, 54%);  $R_f = 0.31$  (petroleum ether/ethyl acetate = 10:1, v/v);  $^1\text{H}$  NMR ( $\text{CDCl}_3$ , 600 MHz)  $\delta$  (ppm): 8.50-8.48 (m, 1H), 7.72 (dd,  $J_1 = 7.2$  Hz,  $J_2 = 1.5$  Hz, 1H), 7.64 (d,  $J = 7.0$  Hz, 2H), 7.54 (t,  $J = 7.4$  Hz, 2H), 7.50 (t,  $J = 7.4$  Hz, 1H), 7.16-7.14 (m, 1H), 3.80 (q,  $J = 7.2$  Hz, 1H), 3.64 (s, 3H), 1.49 (d,  $J = 7.2$  Hz, 3H);  $^{13}\text{C}$  NMR ( $\text{CDCl}_3$ , 150 MHz)  $\delta$  (ppm): 194.7, 173.1, 166.9, 154.6, 152.1, 136.9, 130.4, 130.1, 129.3, 128.9, 128.8, 125.1, 122.6, 52.4, 35.6, 16.3; MS (HRMS)  $m/z$  Calcd. for  $\text{C}_{18}\text{H}_{16}\text{NO}_3^+$  : 294.1125,  $[\text{M}+\text{H}]^+$  found : 294.1128.

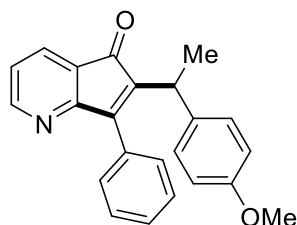

**(S)-6-(1-(4-methoxyphenyl)ethyl)-7-phenyl-5H-cyclopenta[b]pyridin-5-one (4u)**

Yellow oil (62.4 mg, 73%);  $R_f = 0.41$  (petroleum ether/ethyl acetate = 10:1, v/v);  $^1\text{H}$  NMR ( $\text{CDCl}_3$ , 400 MHz)  $\delta$  (ppm): 8.45 (dd,  $J_1 = 5.3$  Hz,  $J_2 = 1.6$  Hz, 1H), 7.63 (dd,  $J_1 = 7.2$  Hz,  $J_2 = 1.6$  Hz, 1H), 7.59-7.56 (m, 2H), 7.55-7.53 (m, 2H), 7.52-7.50 (m, 1H), 7.24 (d,  $J = 8.4$  Hz, 2H), 7.11-7.08 (m, 1H), 6.82 (d,  $J = 8.8$  Hz, 2H), 4.18 (q,  $J = 7.2$  Hz, 1H), 3.78 (s, 3H), 1.67 (d,  $J = 7.3$  Hz, 3H);  $^{13}\text{C}$  NMR ( $\text{CDCl}_3$ , 100 MHz)  $\delta$  (ppm): 195.9, 167.0, 158.1, 154.1, 152.0, 141.2, 135.6, 131.0, 129.7, 129.0, 128.8, 128.7, 128.6, 125.2, 122.4, 113.9, 55.3, 35.3, 19.3; MS (HRMS)  $m/z$  Calcd. for  $\text{C}_{23}\text{H}_{20}\text{NO}_2^+$  : 342.1489,  $[\text{M}+\text{H}]^+$  found : 342.1483.

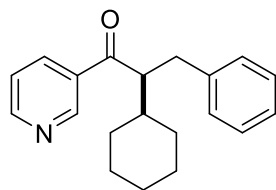

**(S)-2-cyclohexyl-3-phenyl-1-(pyridin-3-yl)propan-1-one (9)**

White solid (40.3 mg, 56%);  $R_f = 0.43$  (petroleum ether/ethyl acetate = 4:1, v/v);  $^1\text{H}$  NMR ( $\text{CDCl}_3$ , 400 MHz)  $\delta$  (ppm): 9.08 (s, 1H), 8.74-8.73 (m, 1H), 8.14-8.11 (m, 1H), 7.41-7.38 (m, 1H), 7.24 (t,  $J = 7.6$  Hz, 2H), 7.17-7.13 (m, 3H), 3.43-3.78 (m, 1H), 3.36-3.30 (m, 1H), 3.18-3.12 (m, 1H), 1.89-1.86 (m, 1H), 1.79-1.75 (m, 1H), 1.66-1.55 (m, 3H), 1.50-1.47 (m, 1H), 1.28-1.23 (m, 1H), 1.15-1.09 (m, 2H), 1.04-1.00 (m, 1H), 0.90-0.81 (m, 1H);  $^{13}\text{C}$  NMR ( $\text{CDCl}_3$ , 100 MHz)  $\delta$  (ppm): 198.3, 152.5, 148.9, 143.2, 135.9, 132.8, 128.3, 128.2, 126.3, 123.8, 47.3, 43.0, 42.8, 31.6, 30.9, 26.5, 26.3; MS (HRMS)  $m/z$  Calcd. for  $\text{C}_{20}\text{H}_{24}\text{NO}^+$  : 294.1852,  $[\text{M}+\text{H}]^+$  found : 294.1849.

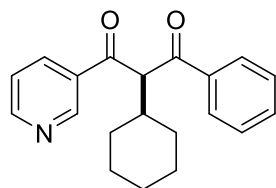

**(R)-2-cyclohexyl-1-phenyl-3-(pyridin-3-yl)propane-1,3-dione (10)**

White solid (22.3 mg, 29%);  $R_f = 0.30$  (petroleum ether/ethyl acetate = 4:1, v/v);  $^1\text{H}$  NMR ( $\text{CDCl}_3$ , 400 MHz)  $\delta$  (ppm): 9.21 (s, 1H), 8.76-8.75 (m, 1H), 8.30-8.27 (m, 1H), 8.01 (t,  $J = 8.2$  Hz, 2H), 7.58 (d,  $J = 7.4$  Hz, 1H), 7.47 (t,  $J = 7.7$  Hz, 2H), 7.42-7.39 (m, 1H), 5.13 (d,  $J = 9.4$  Hz, 1H), 2.72-2.63 (m, 1H), 1.72-1.66 (m, 4H), 1.40-1.26 (m, 4H), 1.16-1.05 (m, 2H);  $^{13}\text{C}$  NMR ( $\text{CDCl}_3$ , 100 MHz)  $\delta$  (ppm): 195.2, 194.5, 153.5, 149.8, 137.1, 136.4, 133.9, 132.6, 129.1, 128.8, 123.9, 64.6, 39.9, 31.9, 31.8, 26.3, 26.2; MS (HRMS)  $m/z$  Calcd. for  $\text{C}_{20}\text{H}_{22}\text{NO}_2^+$  : 308.1645,  $[\text{M}+\text{H}]^+$  found : 308.1640.

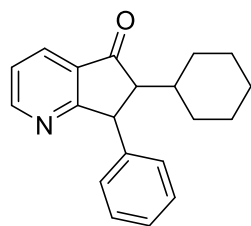

**6-cyclohexyl-7-phenyl-6,7-dihydro-5H-cyclopenta[b]pyridin-5-one (11)**

Colorless oil (66.9 mg, 92%);  $R_f = 0.34$  (petroleum ether/ethyl acetate = 4:1, v/v);  $^1\text{H}$  NMR ( $\text{CDCl}_3$ , 400 MHz)  $\delta$  (ppm): 8.79 (d,  $J = 4.7$  Hz, 1H), 8.05 (d,  $J = 7.7$  Hz, 1H), 7.36-7.33 (m, 1H), 7.30 (d,  $J = 7.6$  Hz, 2H), 7.24 (t,  $J = 7.3$  Hz, 1H), 7.12 (t,  $J = 7.2$  Hz, 2H), 4.50 (d,  $J = 3.5$  Hz, 1H), 2.83 (t,  $J = 3.9$  Hz, 1H), 2.19-2.11 (m, 1H), 1.75-1.63 (m, 4H), 1.52-1.49 (m, 1H), 1.35-1.21 (m, 5H);  $^{13}\text{C}$  NMR ( $\text{CDCl}_3$ , 100 MHz)  $\delta$  (ppm): 206.7, 175.4, 156.4, 142.7, 131.7, 130.3, 129.1, 128.1, 127.1, 123.1, 63.2, 50.5, 40.6, 31.0, 29.1, 26.6, 26.4, 26.3. MS (HRMS)  $m/z$  Calcd. for  $\text{C}_{20}\text{H}_{22}\text{NO}^+$  : 292.1696,  $[\text{M}+\text{H}]^+$  found : 292.1692.

## 9. References

- [1] Boersch, C.; Merkul, Eugen.; Muller, T. J. J. Catalytic Syntheses of N-Heterocyclic Ynones and Ynediones by In Situ Activation of Carboxylic Acids with Oxalyl Chloride. *Angew. Chem. Int. Ed.* **2011**, *50*, 10448.
- [2] Dermenci, A.; Whittaker, R. E.; Gao, Y.; Cruz, F. A.; Yu, Z.-X.; Dong, G.-B. Rh-catalyzed decarbonylation of conjugated ynones via carbon–alkyne bond activation: reaction scope and mechanistic exploration *via* DFT calculations. *Chem. Sci.* **2015**, *6*, 3201.
- [3] Ji, K.-G.; Yang, F.; Gao, S.-Y.; Tang, J.-J.; Gao, J.-M. Gold-Catalyzed Oxidation/CH Functionalization of Ynones: Efficient and Rapid Access to Functionalized Polycyclic Salicyl Ketones. *Chem. Eur. J.* **2016**, *22*, 10225.
- [4] Aramini, A.; Brinchi, L.; Germani, R.; Savelli, G. Reductions of  $\alpha,\beta$ -Unsaturated Ketones by  $\text{NaBH}_4$  or  $\text{NaBH}_4 + \text{CoCl}_2$ : Selectivity Control by Water or by Aqueous Micellar Solutions. *Eur. J. Org. Chem.* **2000**, 1793.

## 10. $^1\text{H}$ and $^{13}\text{C}$ NMR spectra for substrates and products

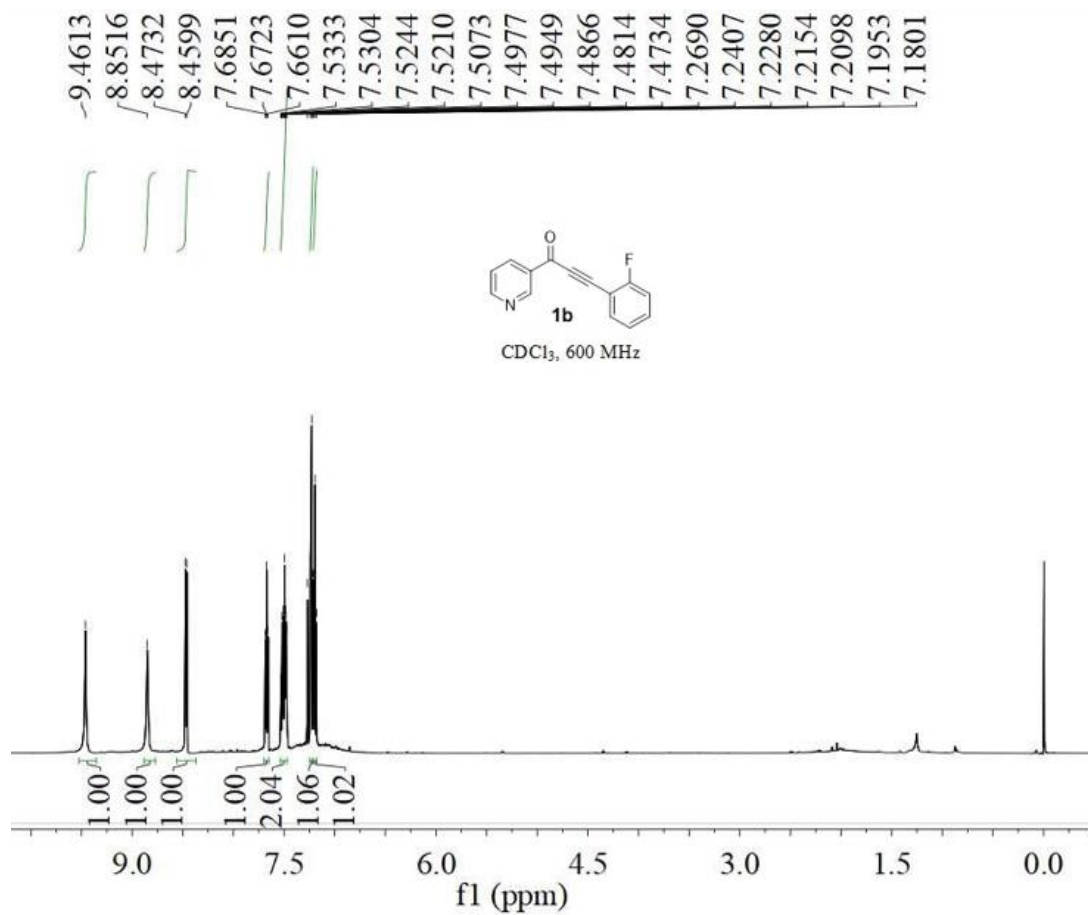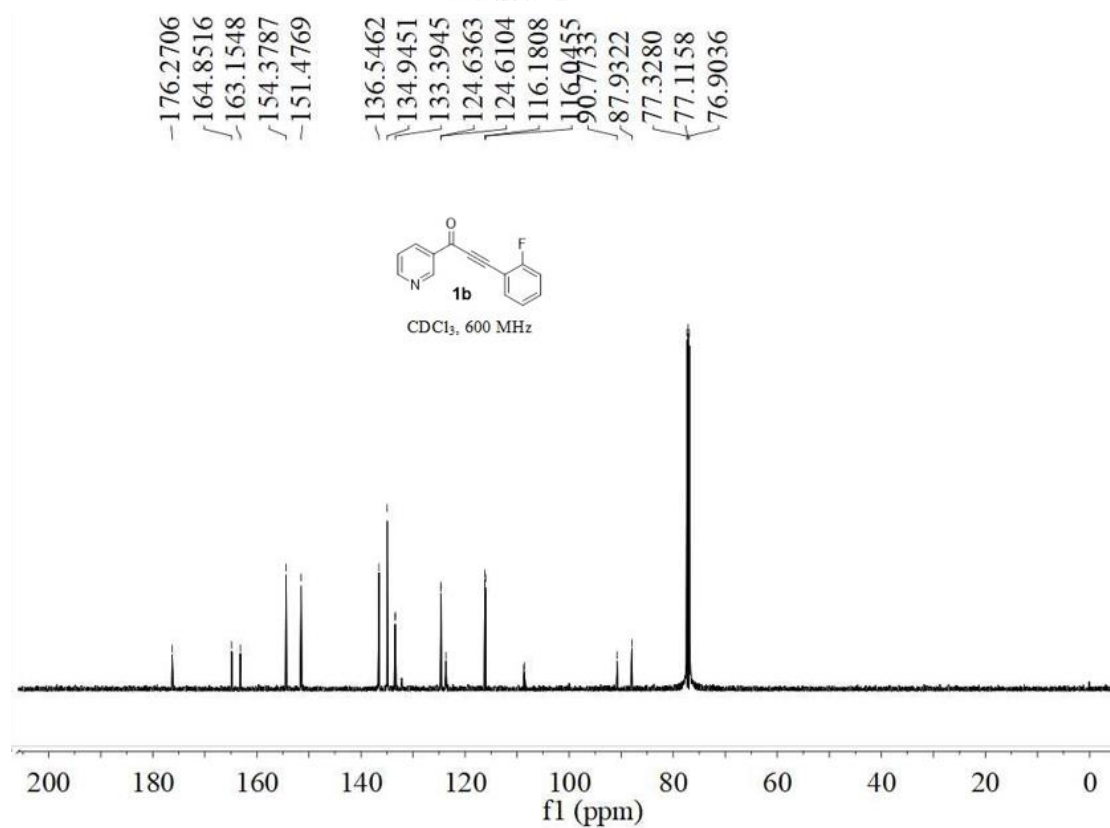



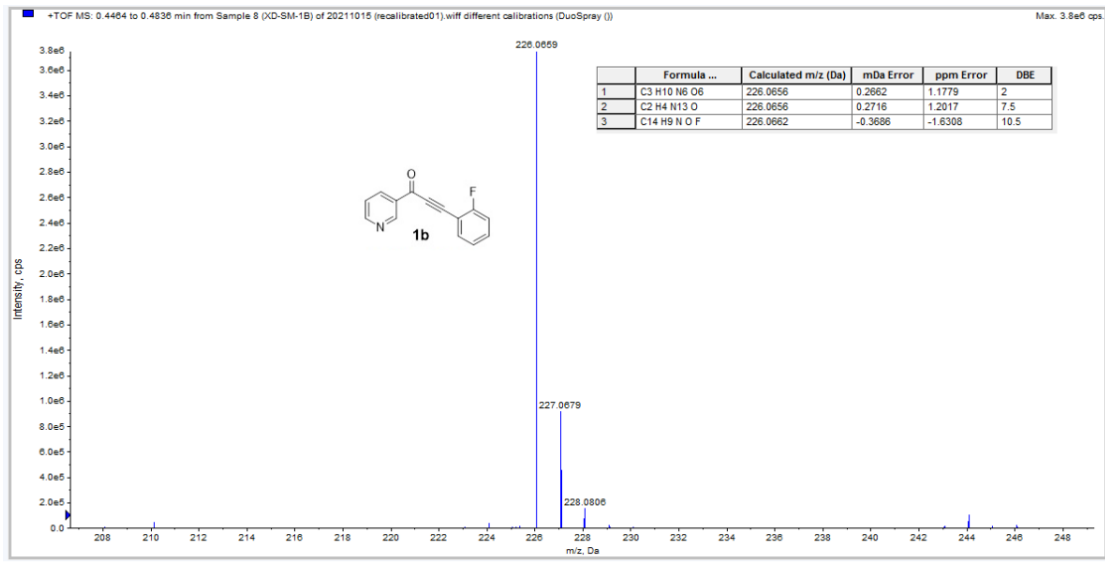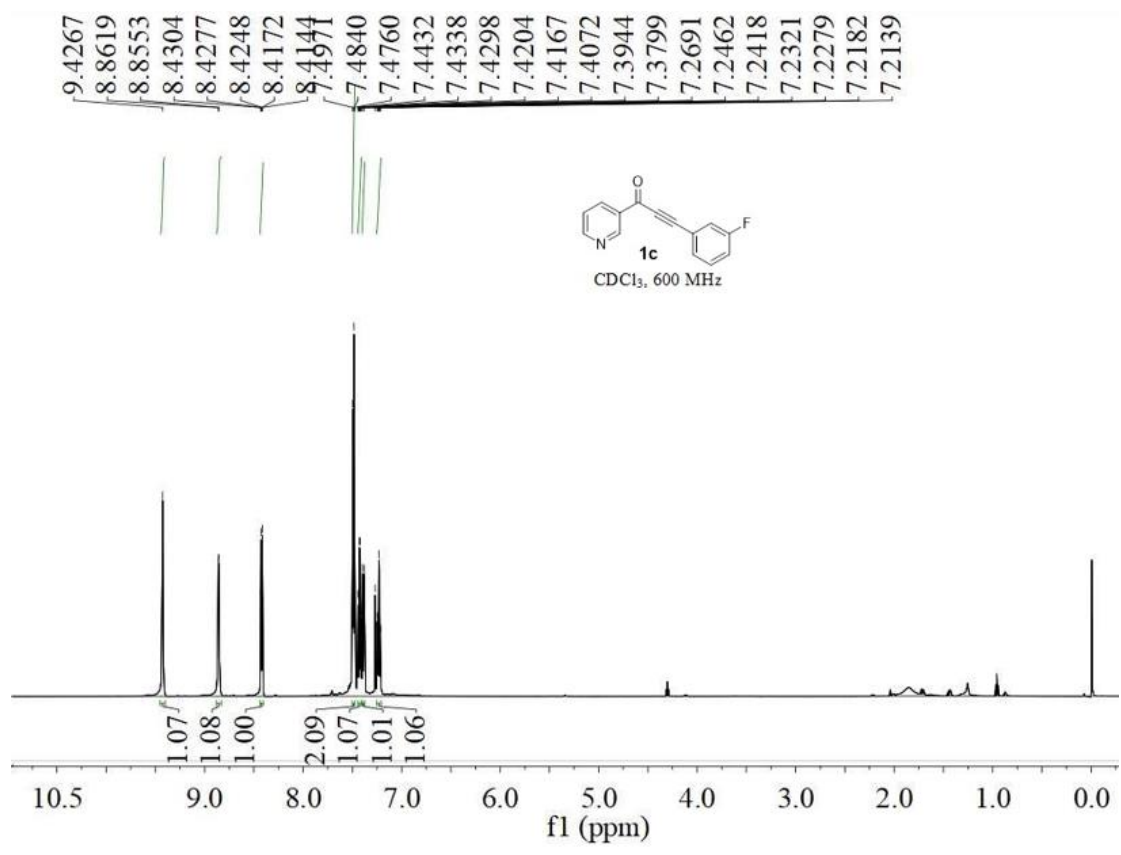

-176.2711  
 163.2167  
 161.5688  
 154.4912  
 151.5029  
 136.3079  
 130.6306  
 129.1989  
 129.1754  
 119.8398  
 118.8731  
 118.7324  
 92.6939  
 86.5047  
 77.3214  
 77.1087  
 76.8959

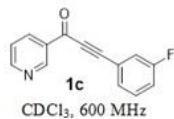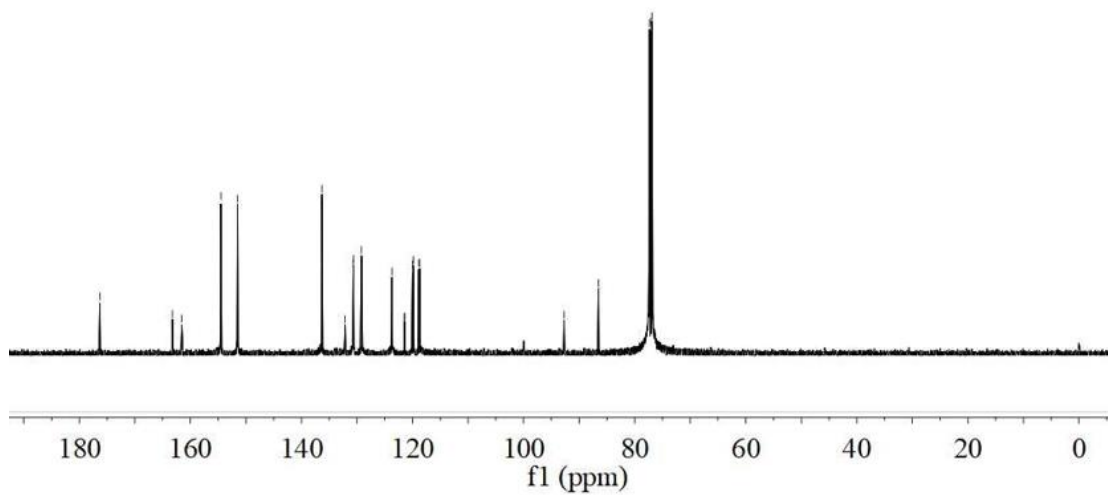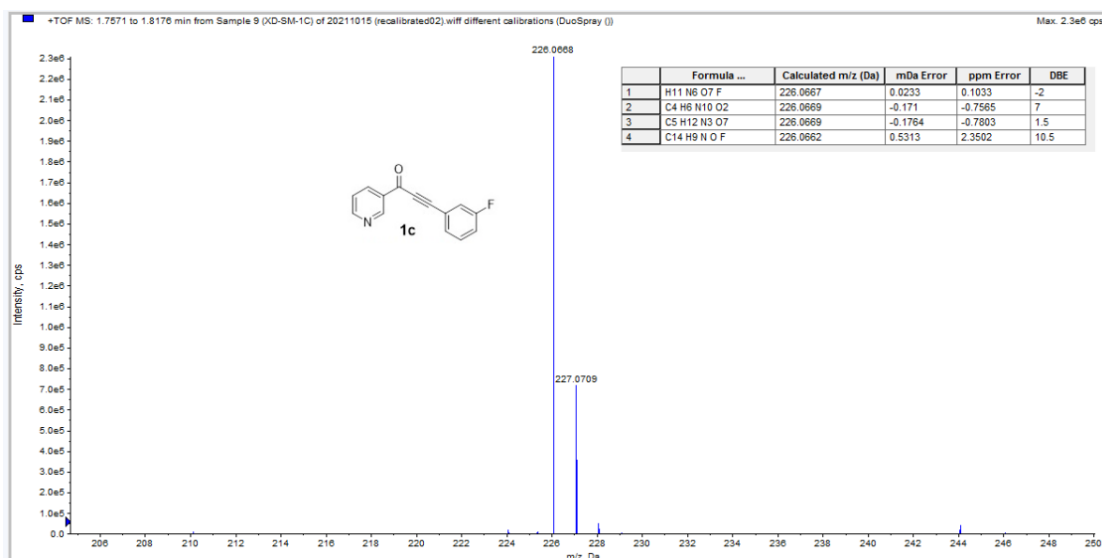

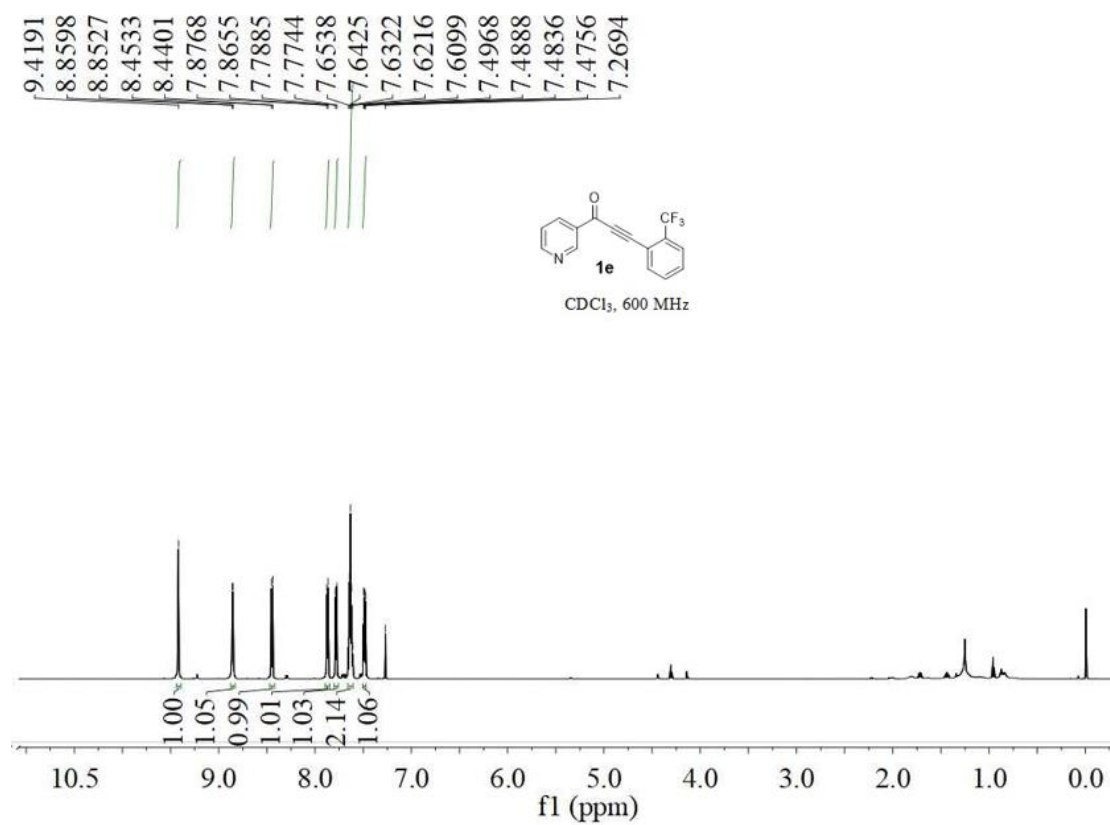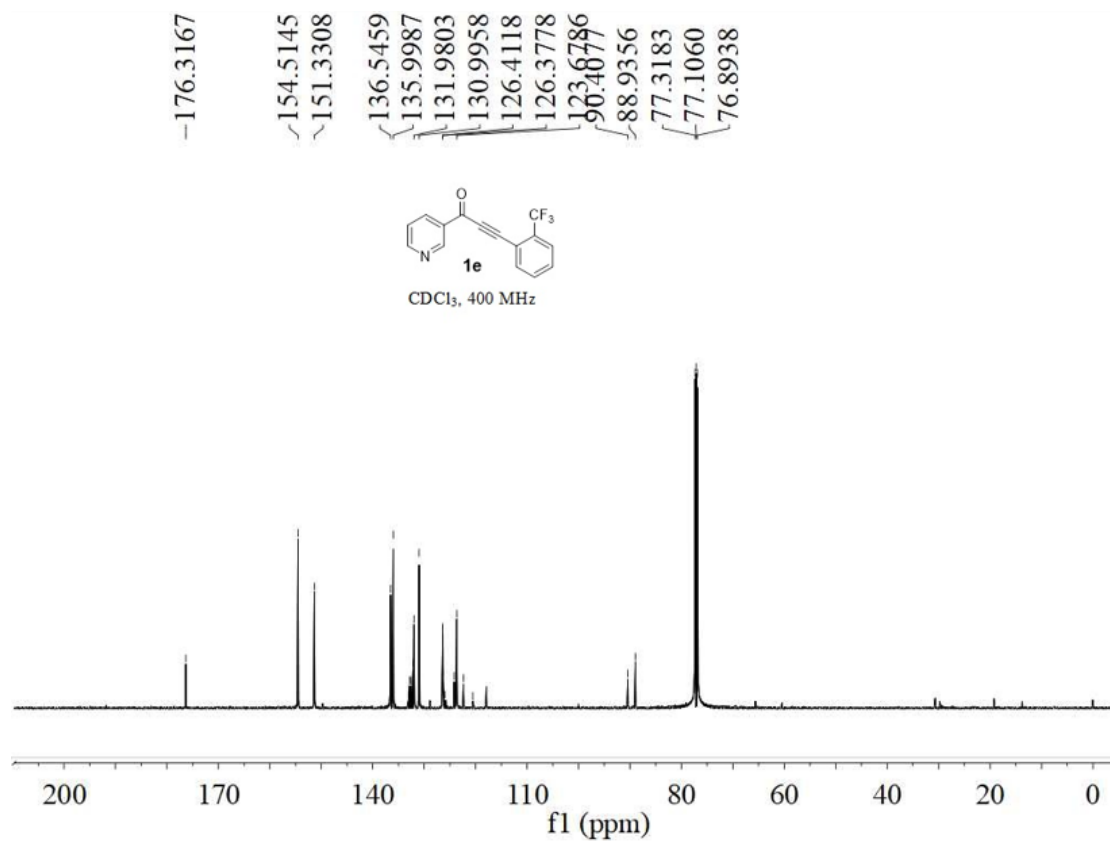

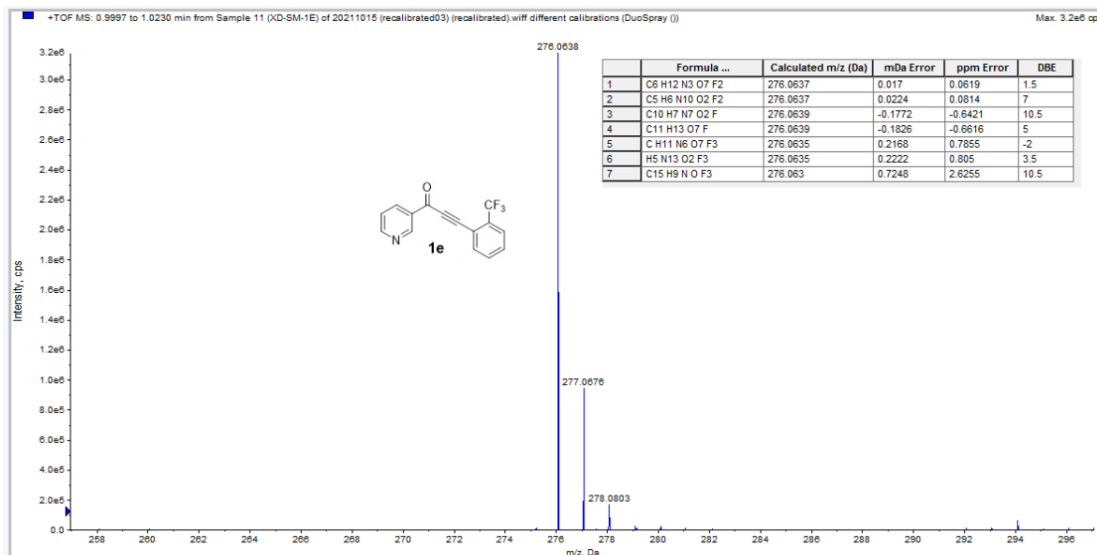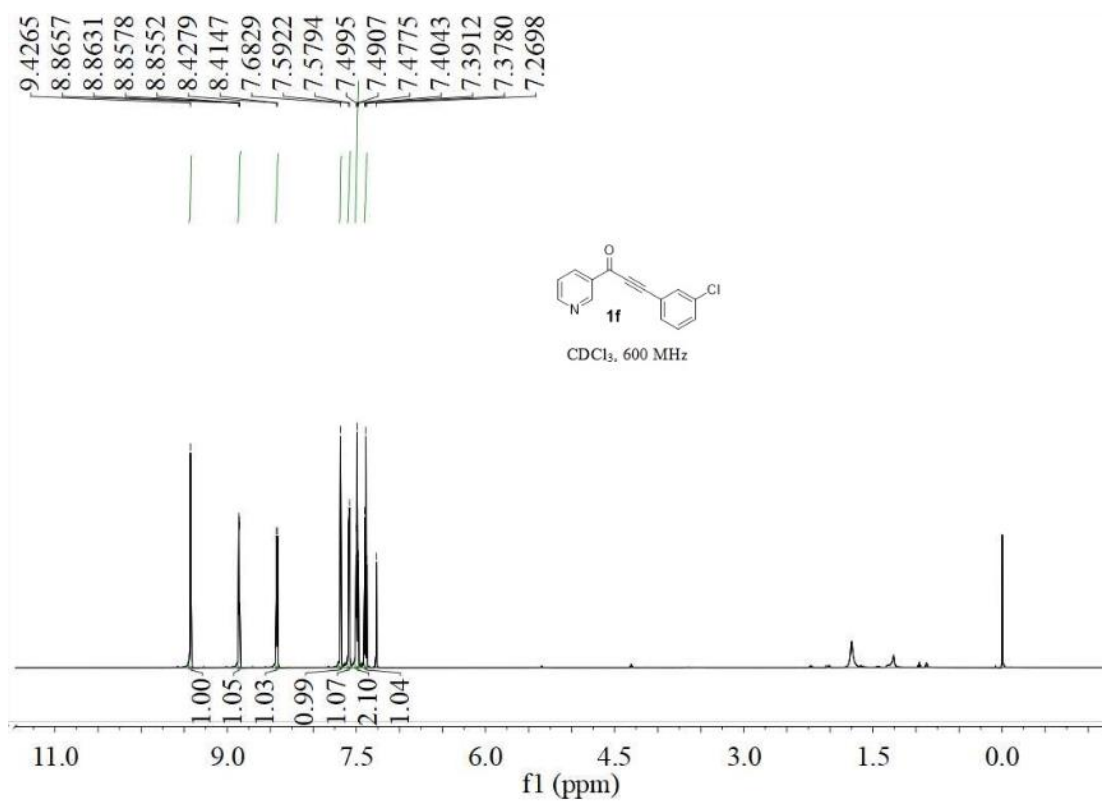

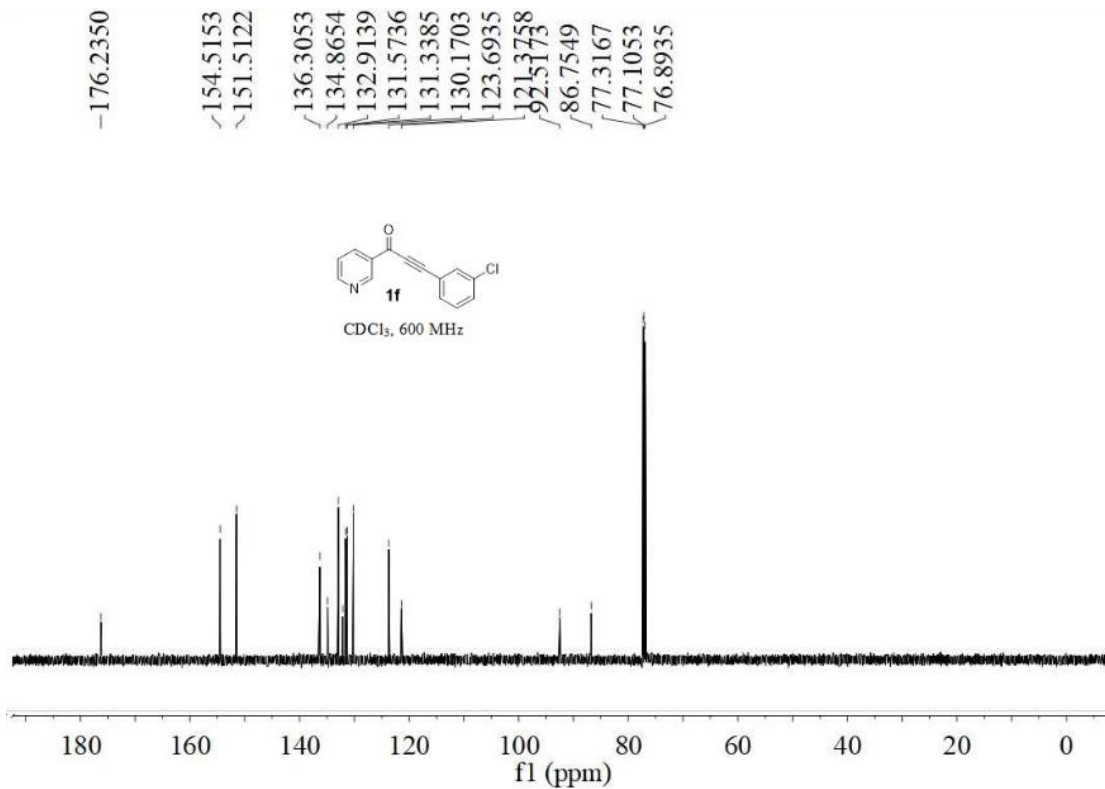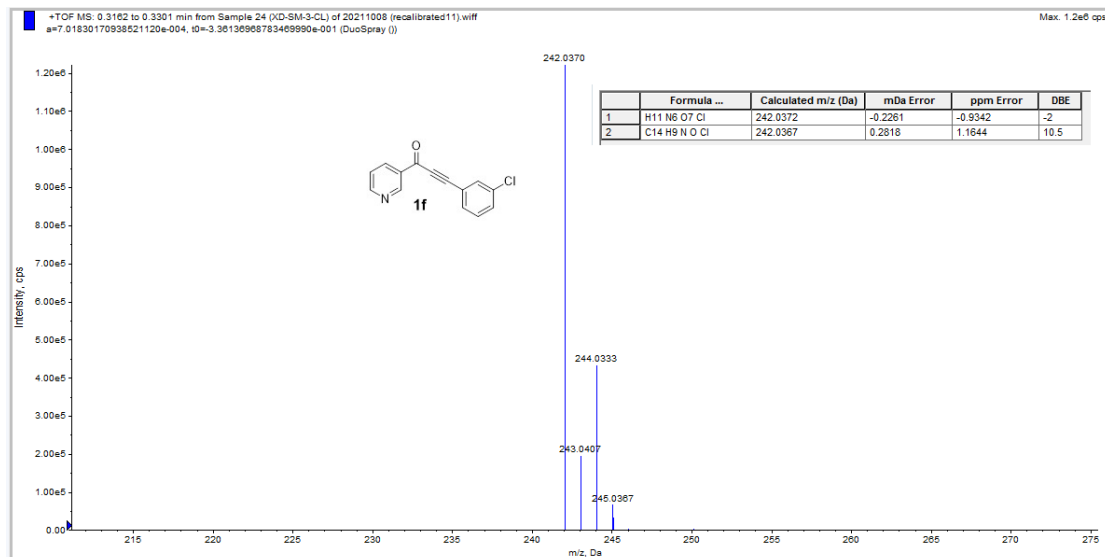

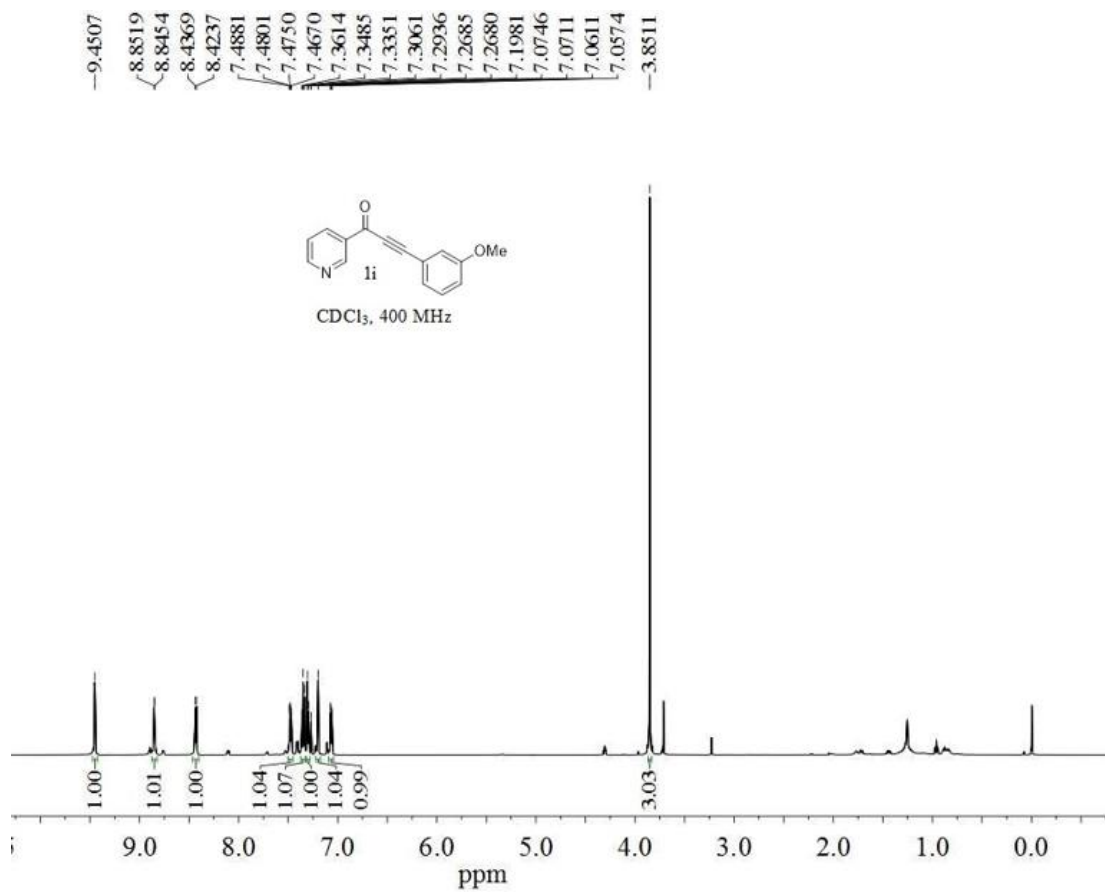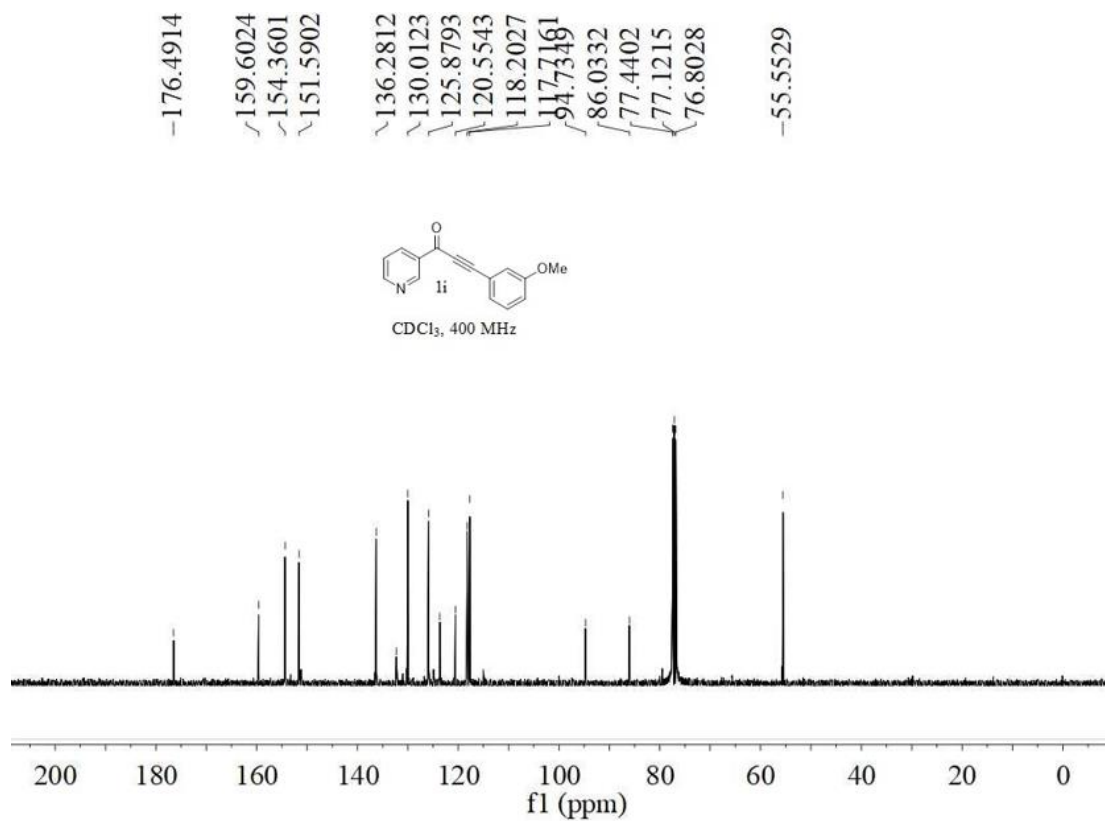

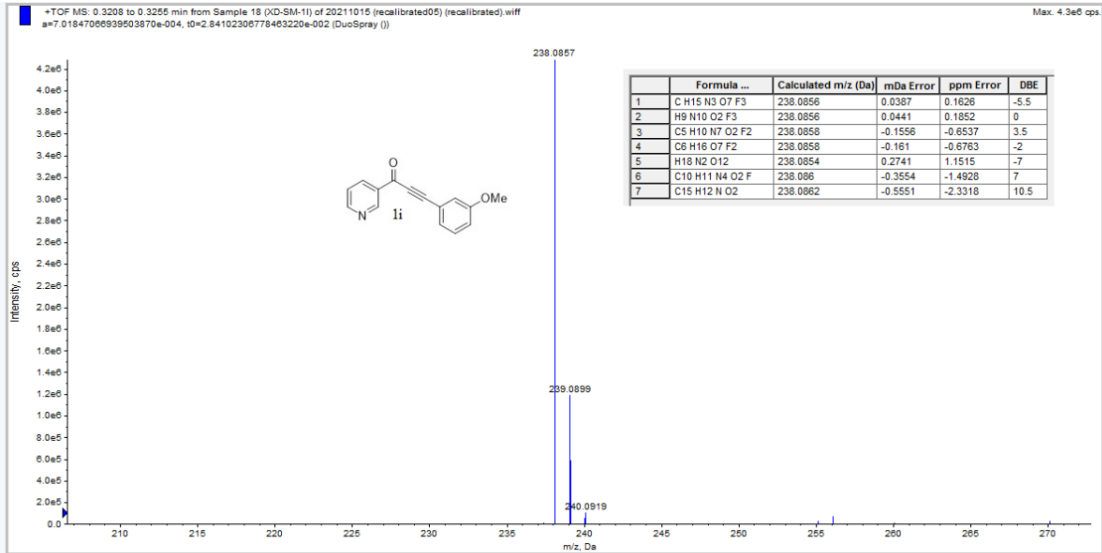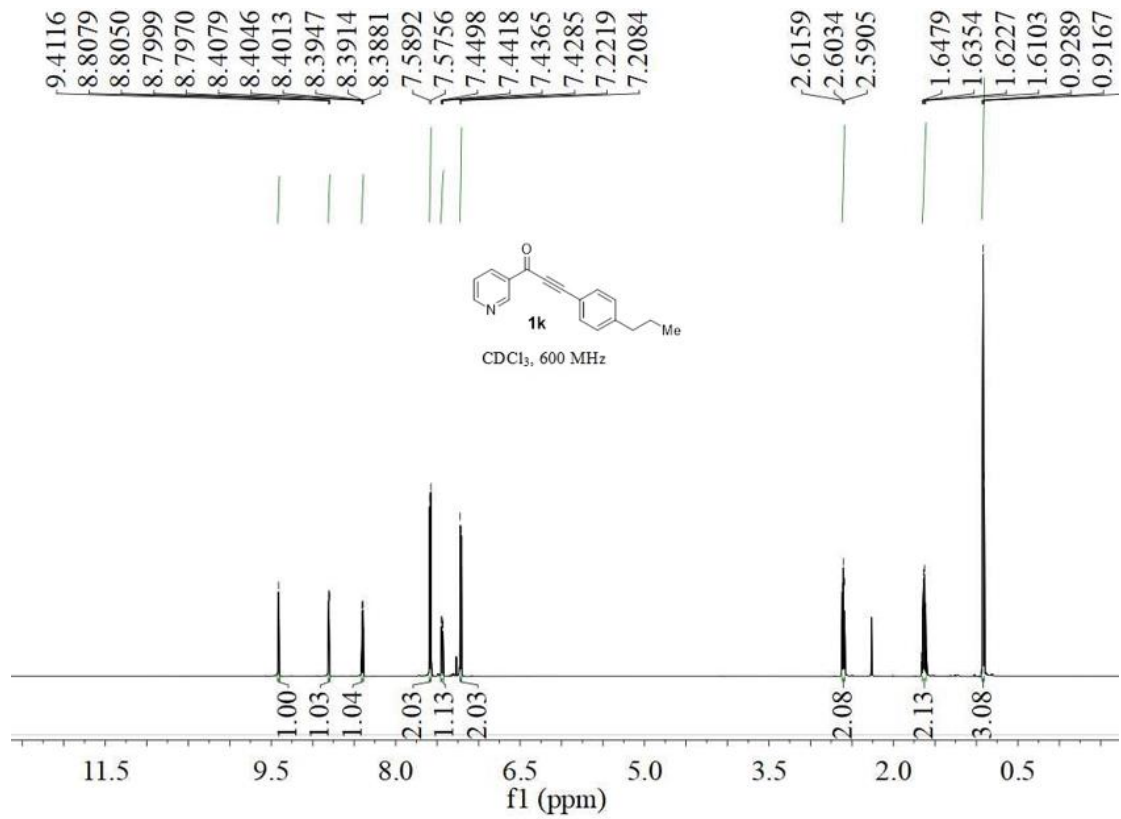

-176.4572  
 154.1677  
 151.4473  
 146.9063  
 136.2509  
 133.4092  
 132.3638  
 129.0788  
 123.6002  
 116.7133  
 95.6446  
 86.3291  
 77.4042  
 77.1916  
 76.9787  
 -38.1954  
 -24.2252  
 -13.7864

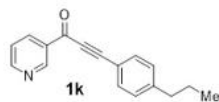

CDCl<sub>3</sub>, 600 MHz

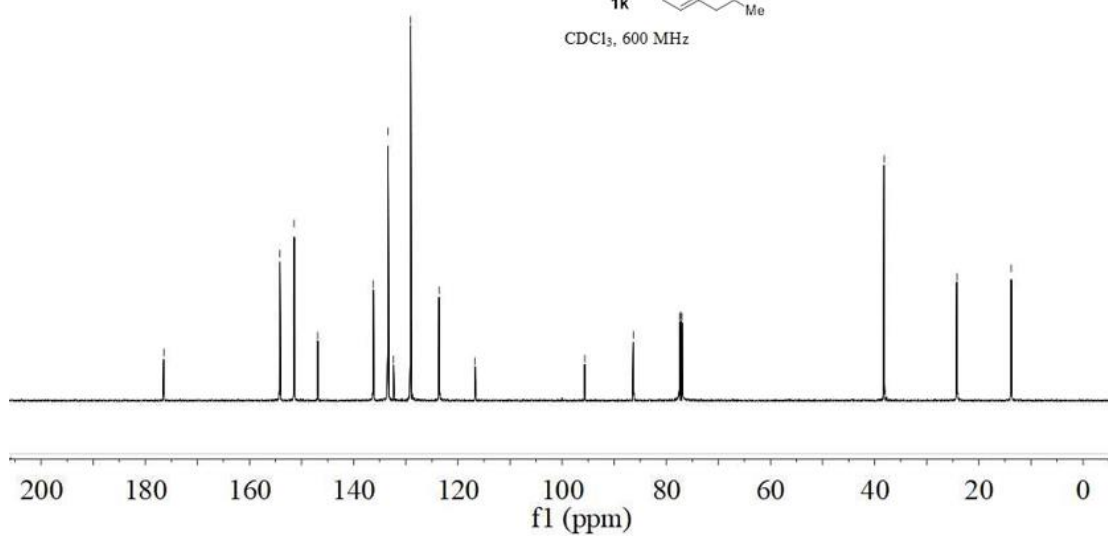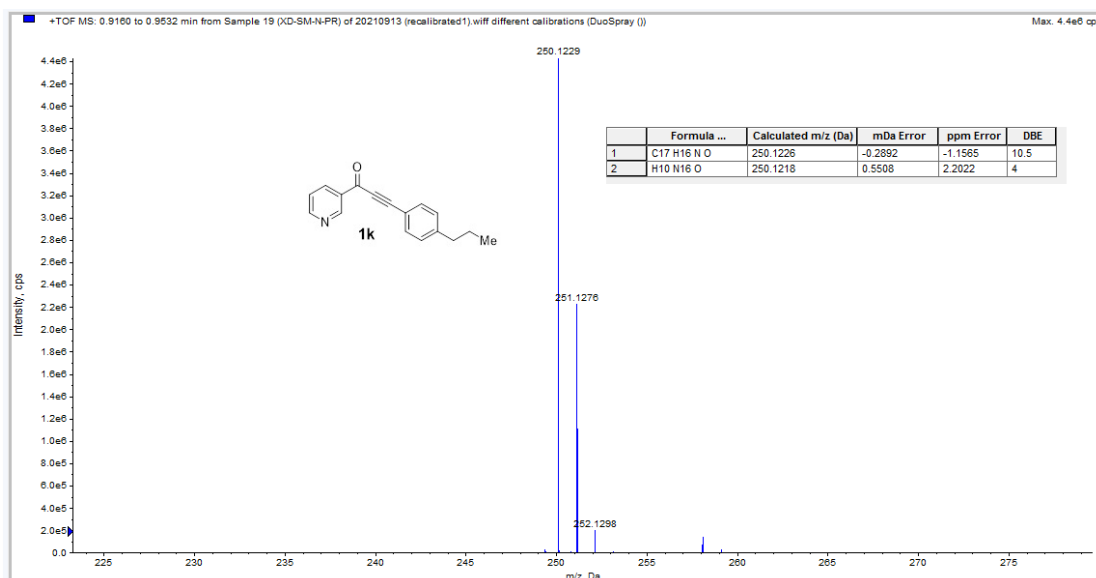



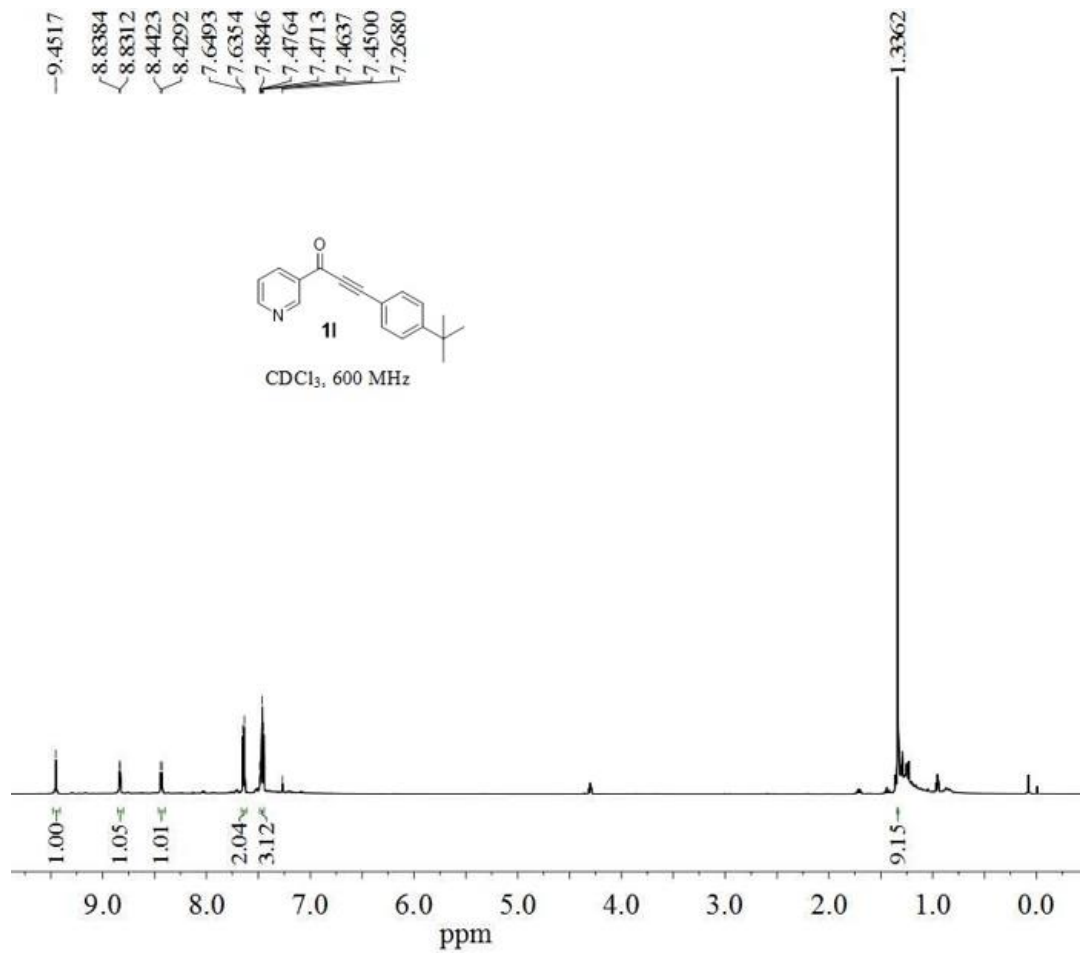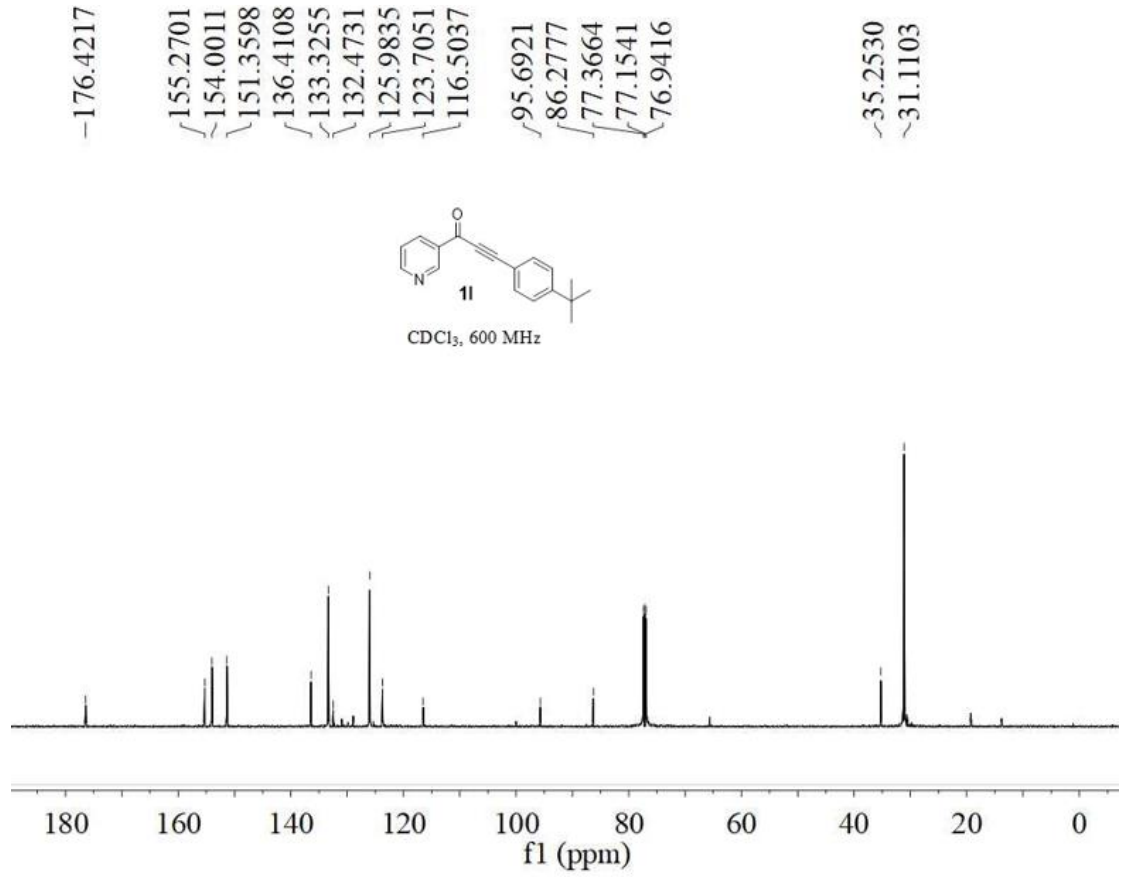

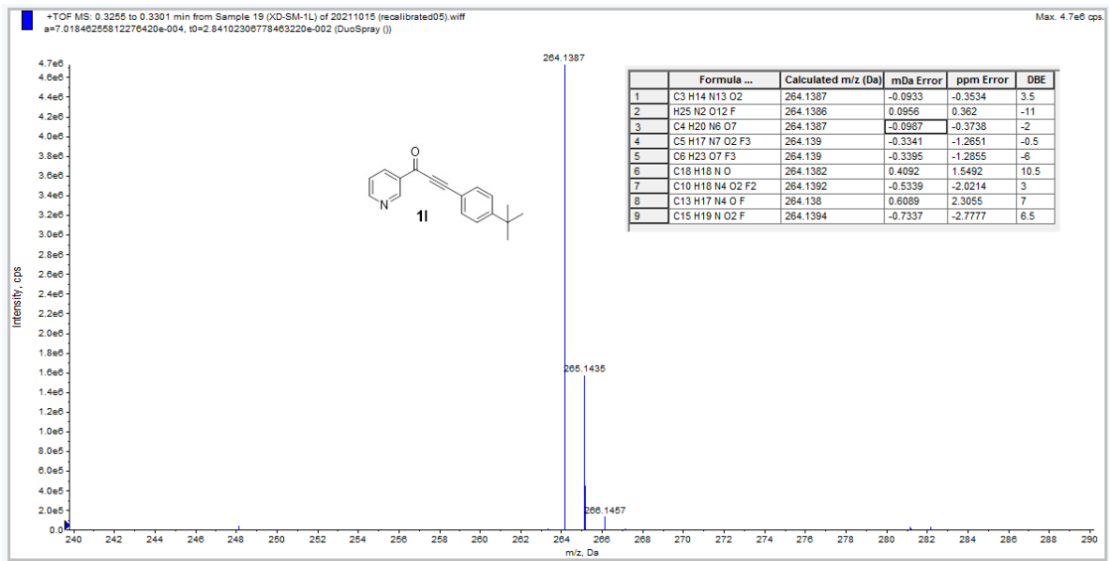

-9.4243  
 8.8424  
 8.8352  
 8.4198  
 8.4066  
 7.8996  
 7.4801  
 7.4722  
 7.4669  
 7.4590  
 7.4060  
 7.4008  
 7.3977  
 7.3927  
 7.3403  
 7.3318  
 7.2680

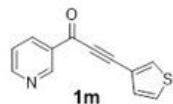

CDCl<sub>3</sub>, 600 MHz

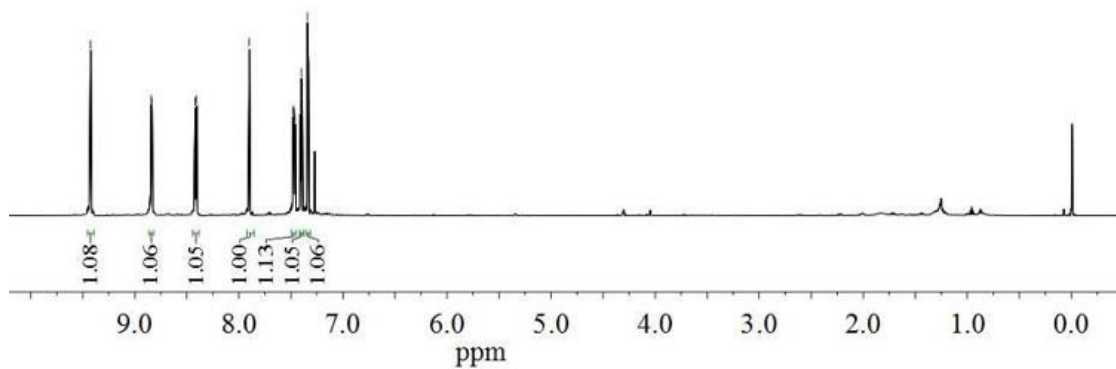

-176.4549  
 154.2969  
 151.5329  
 136.2160  
 134.7943  
 132.2644  
 130.3710  
 126.6127  
 123.6352  
 118.9596  
 90.2107  
 86.7457  
 77.3361  
 77.1240  
 76.9112

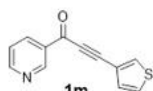

CDCl<sub>3</sub>, 600 MHz

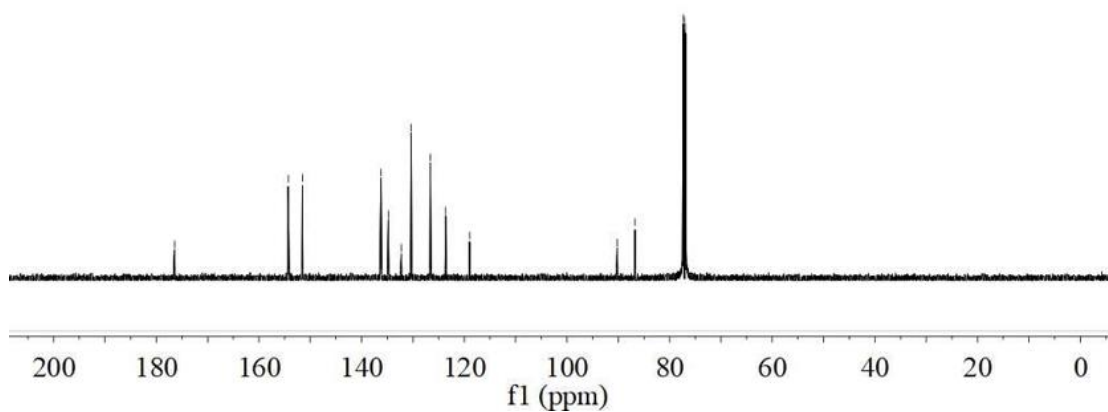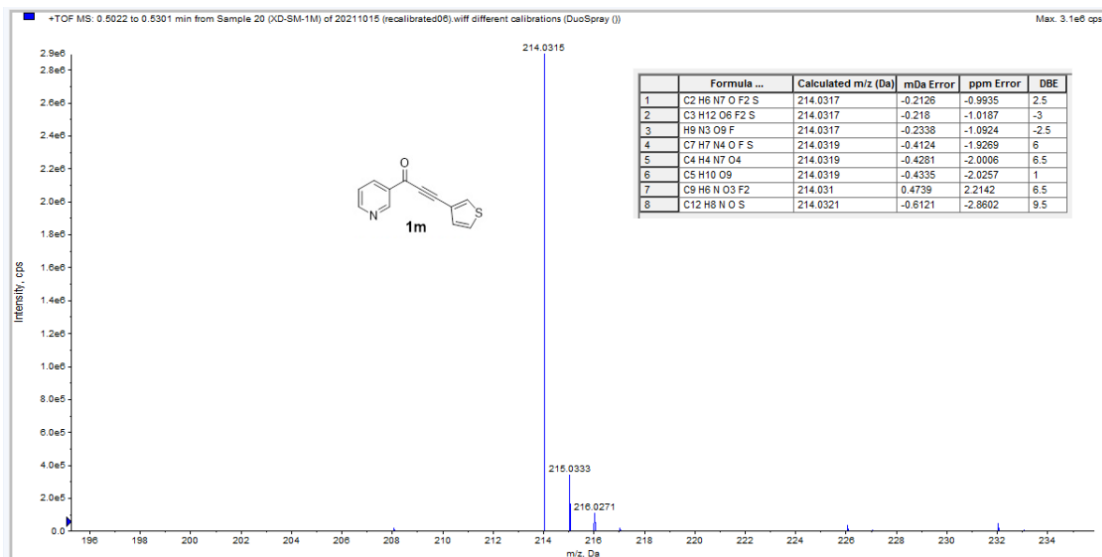

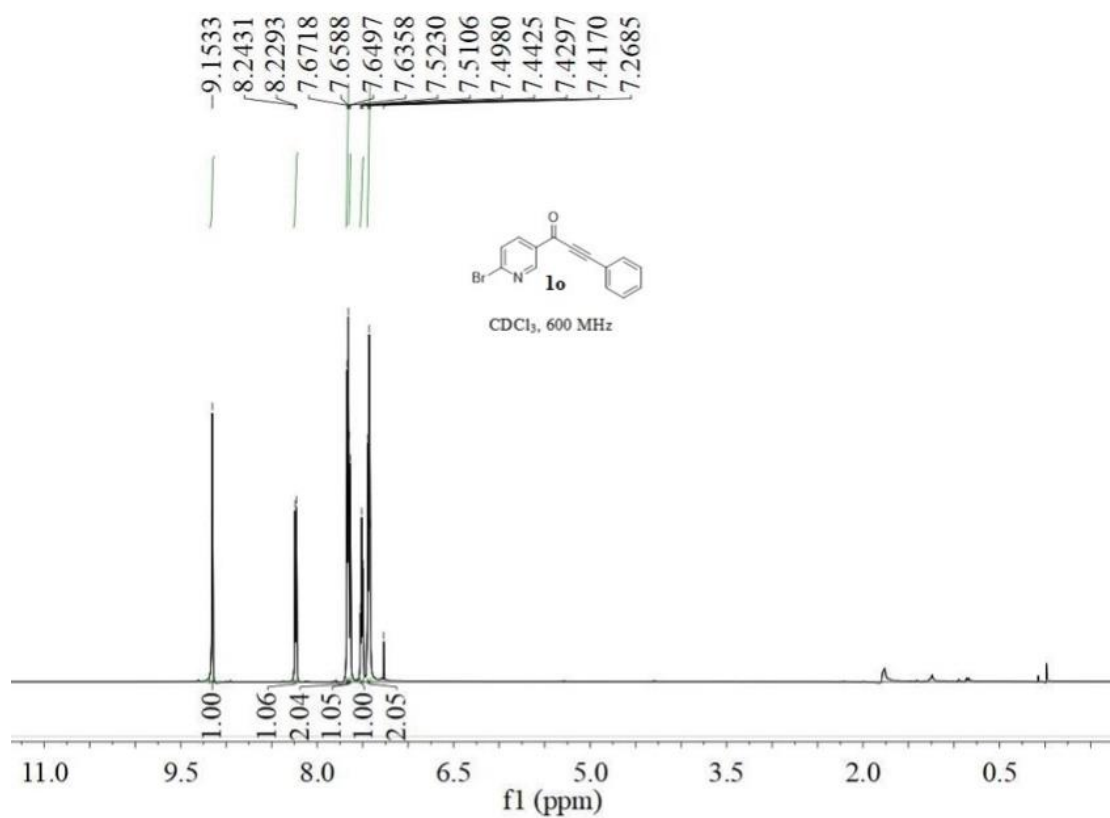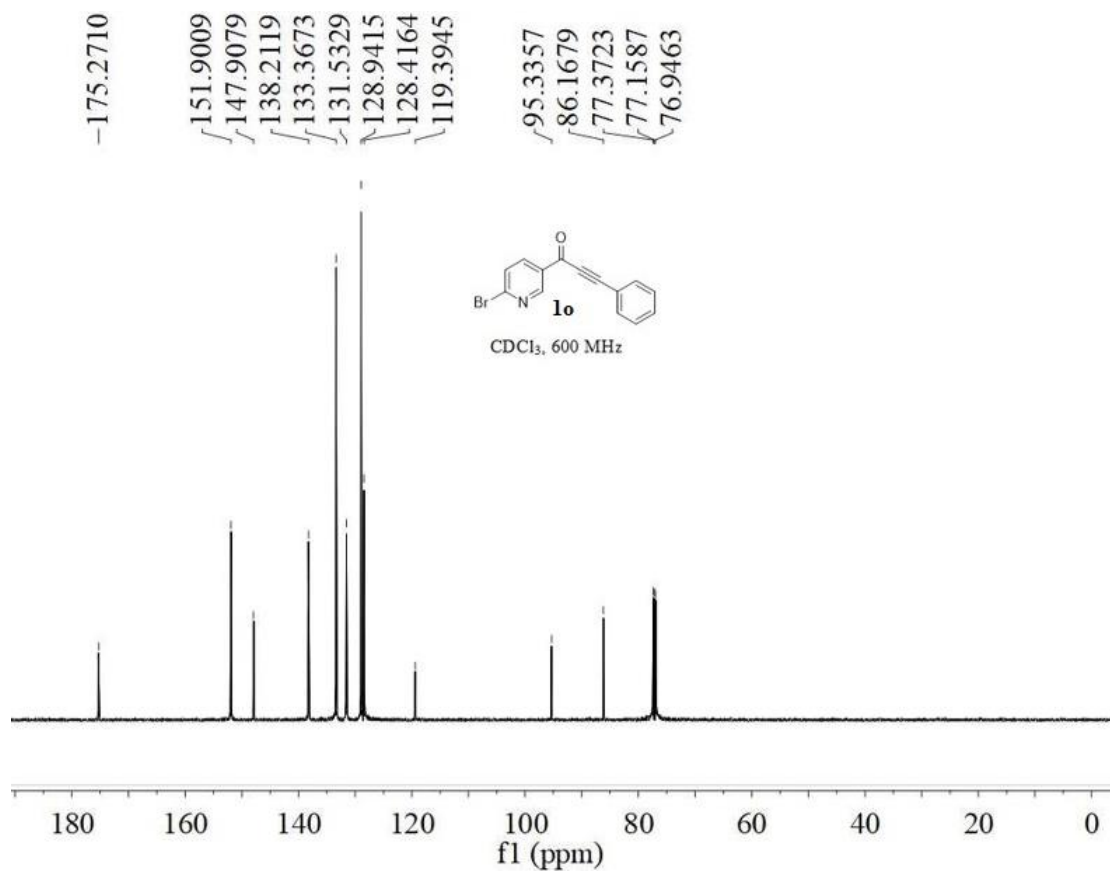

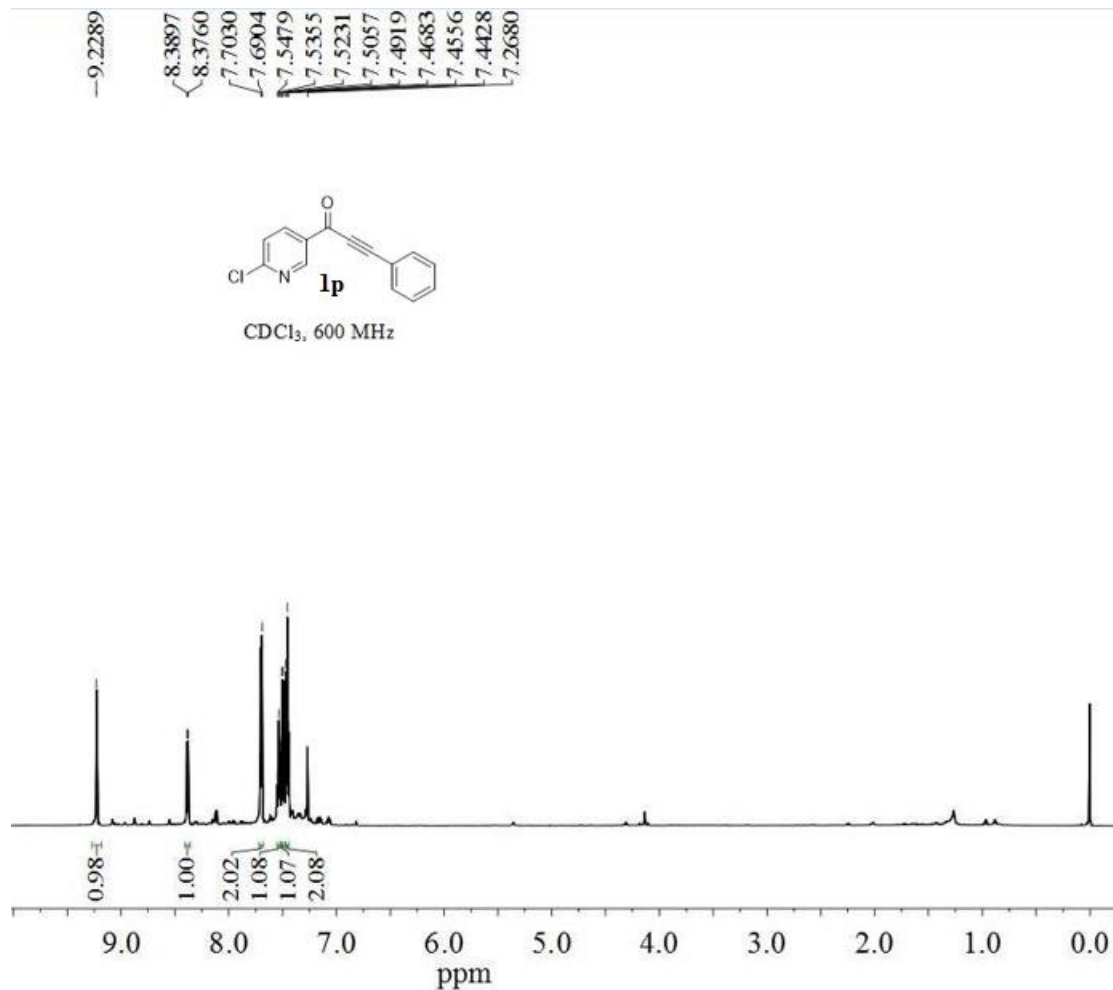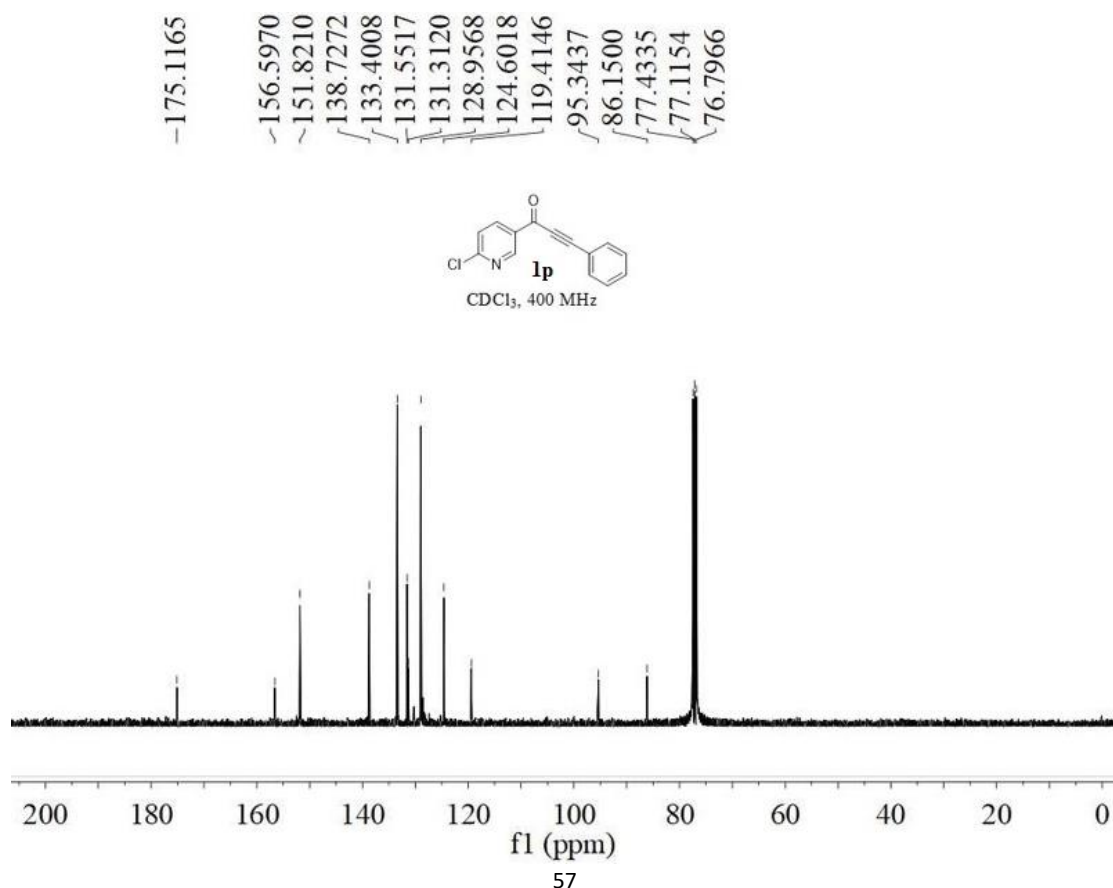

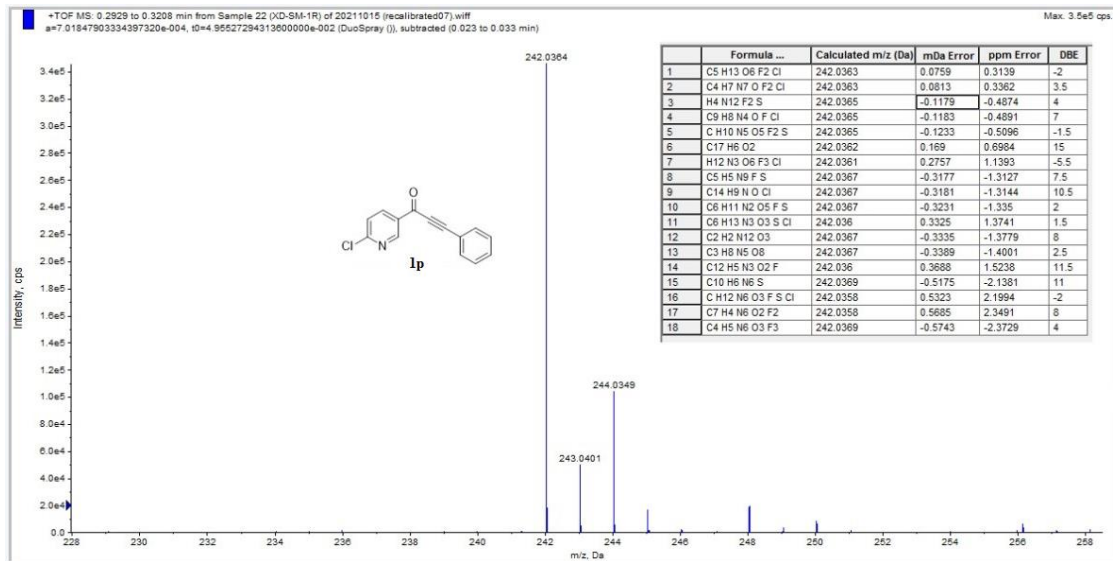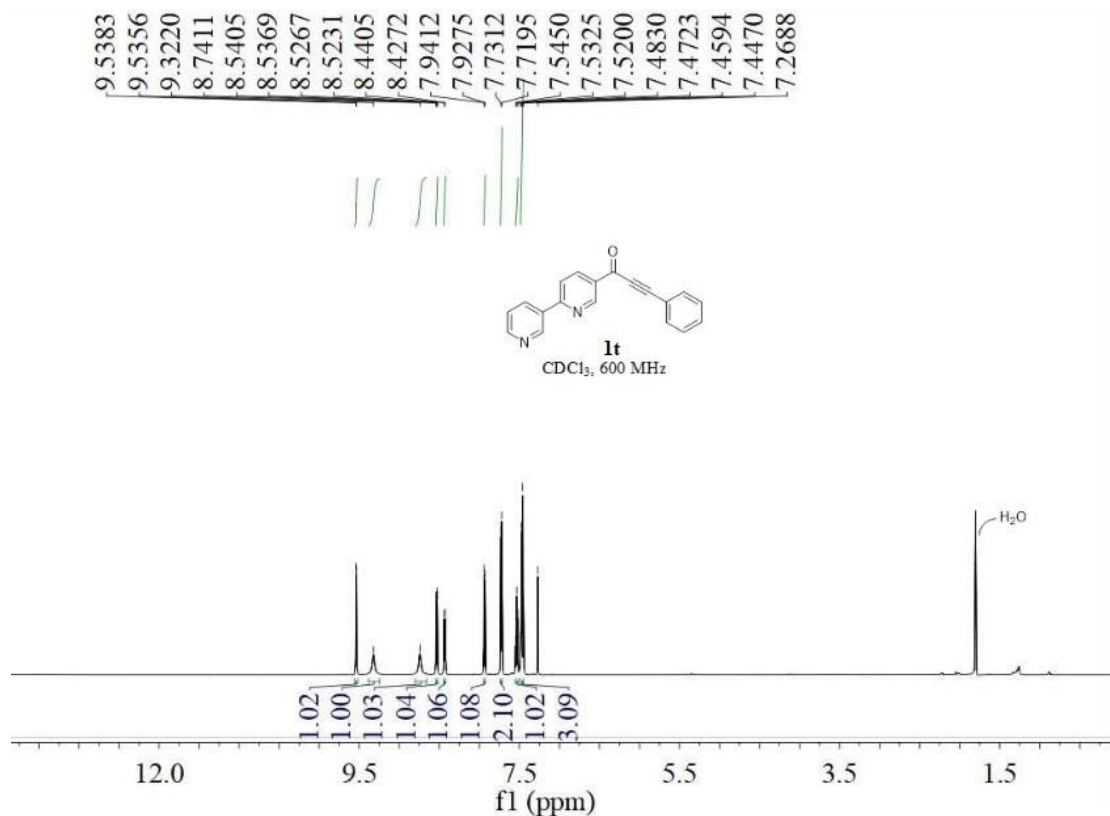

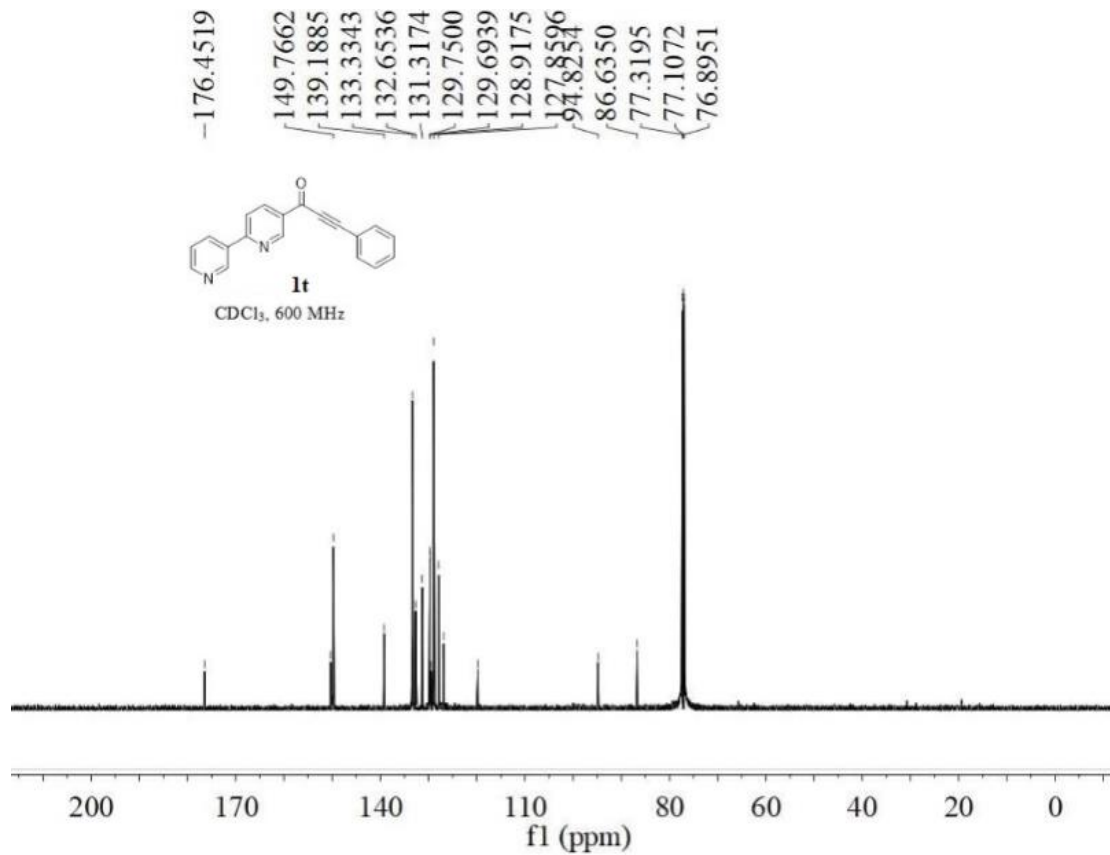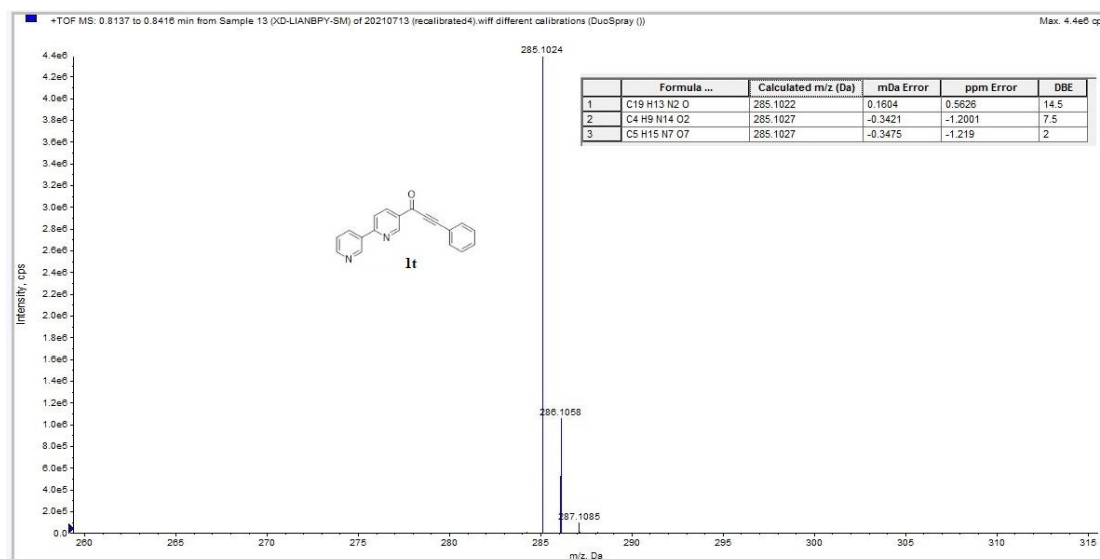

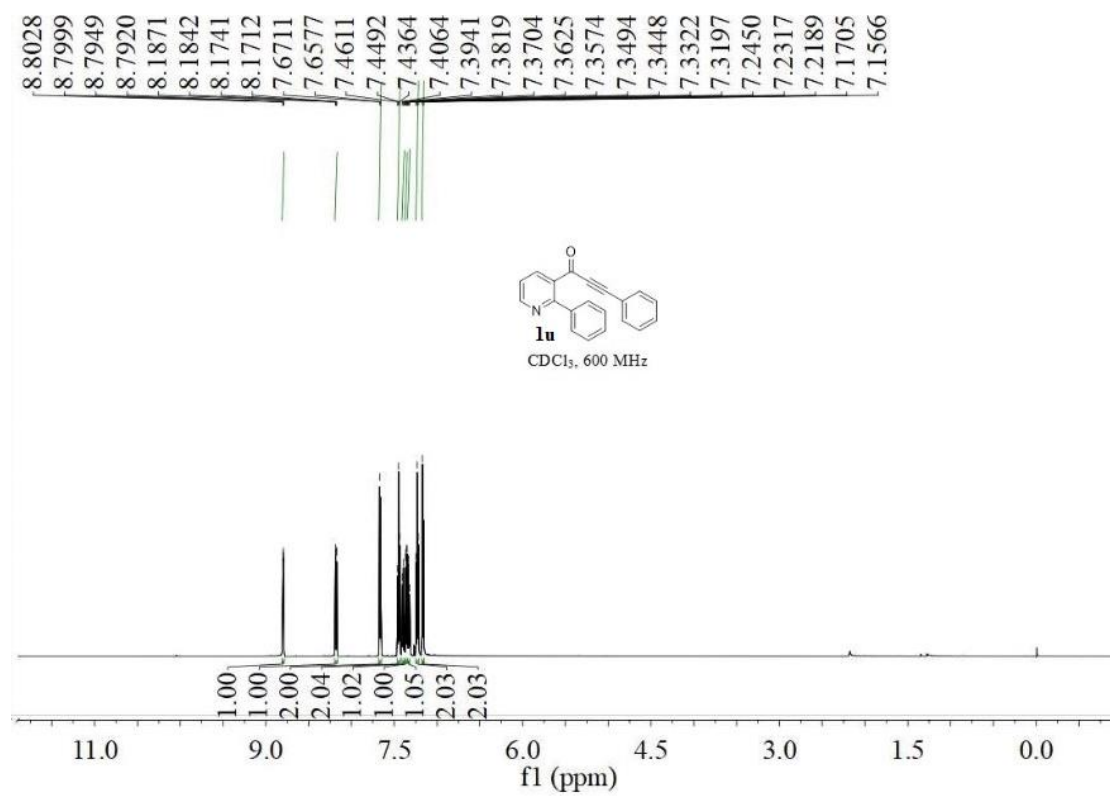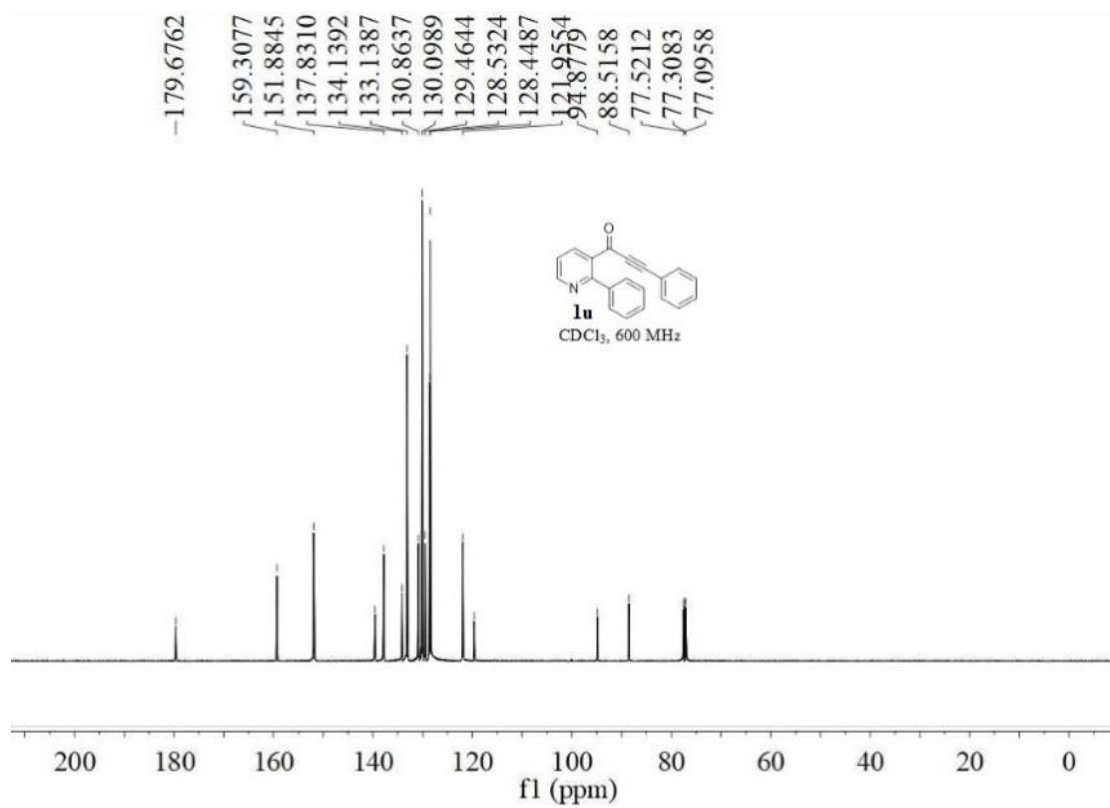



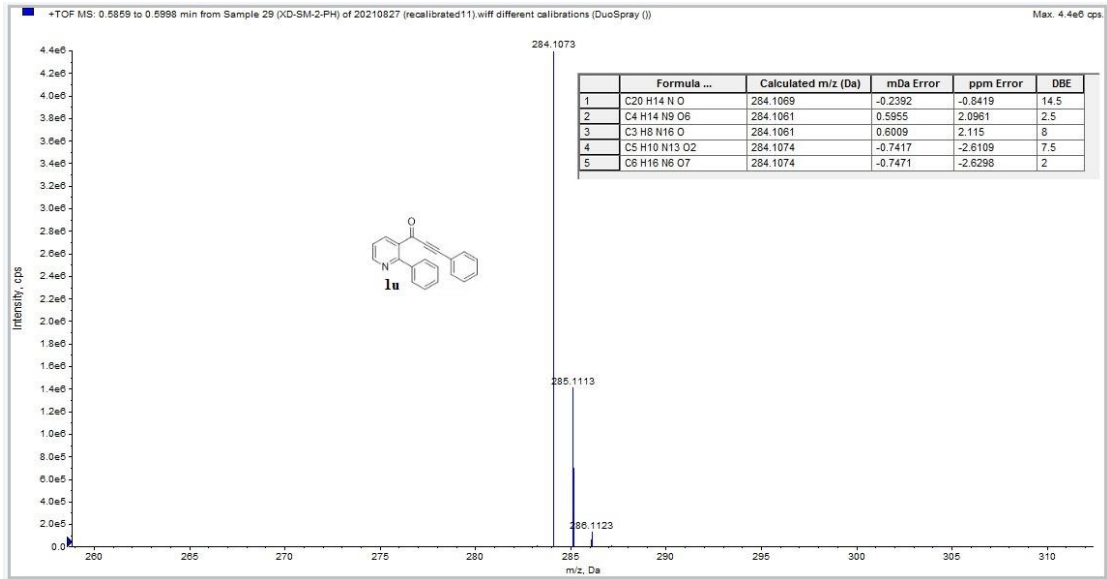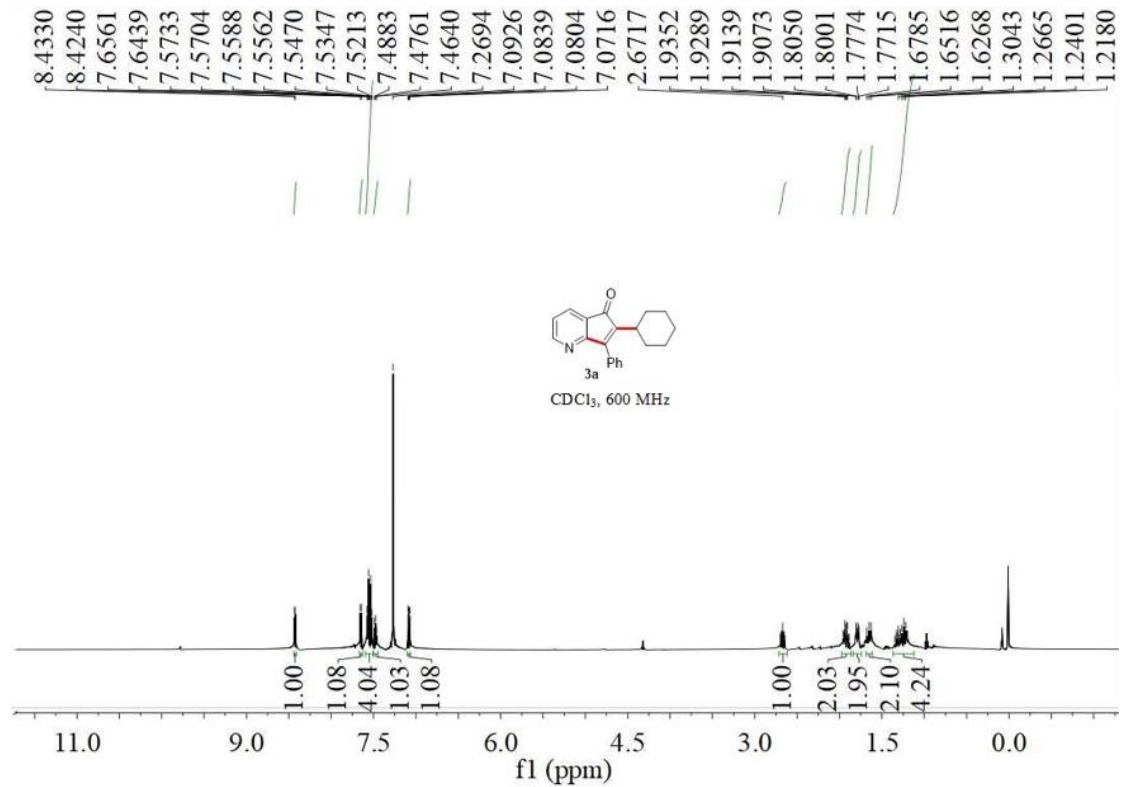

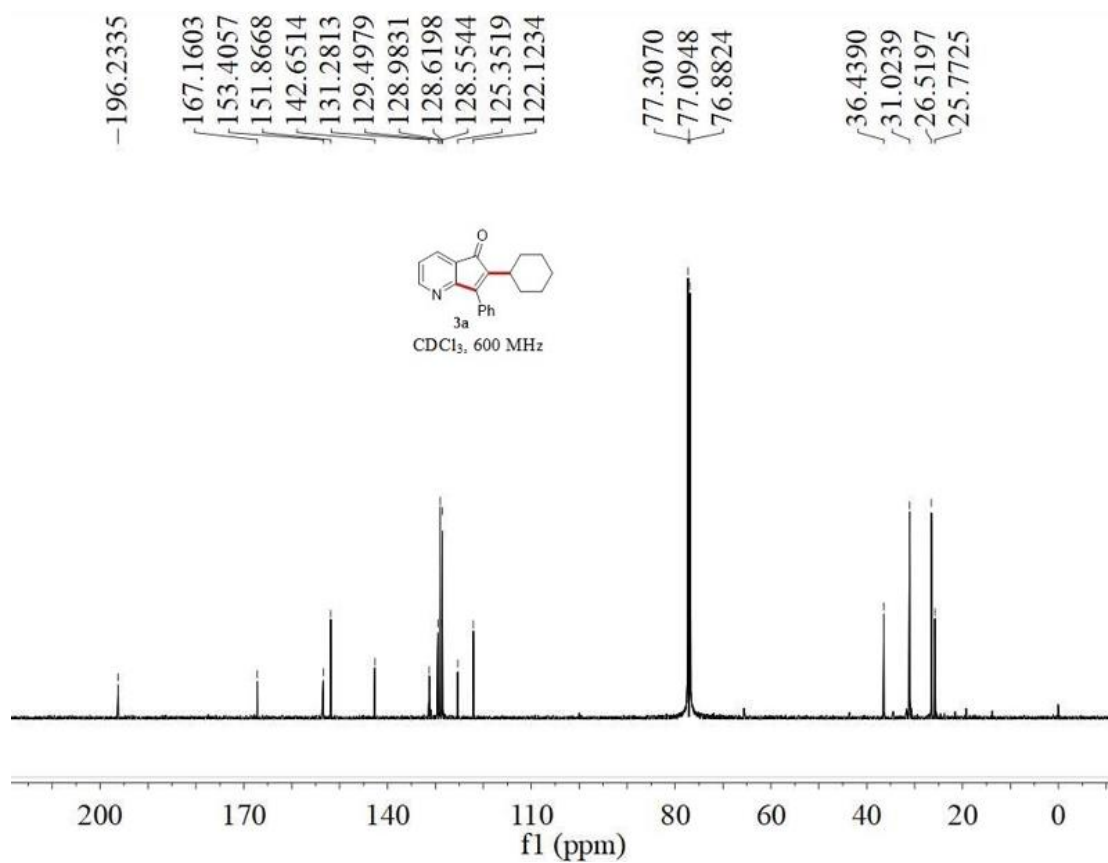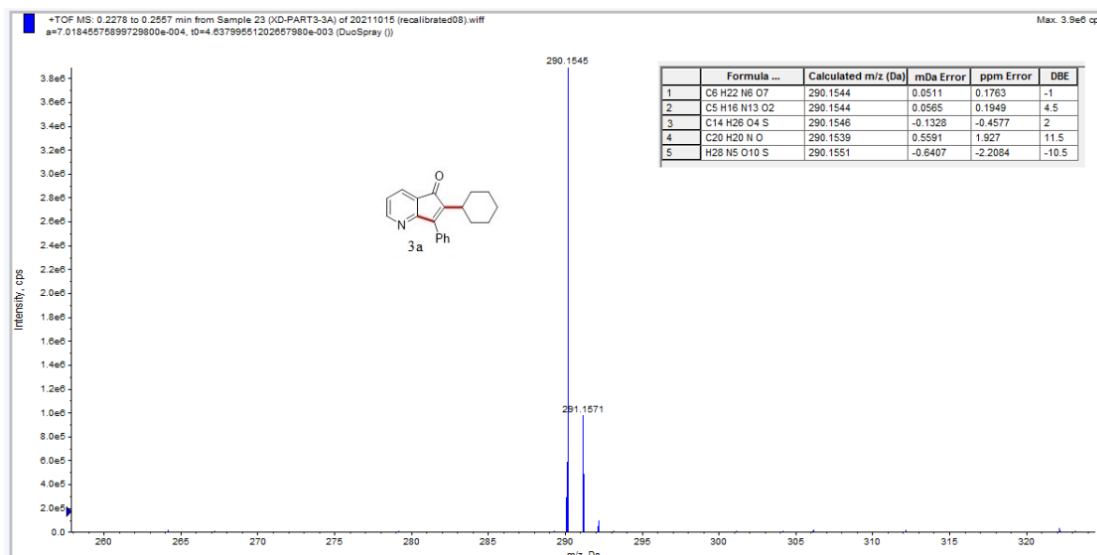

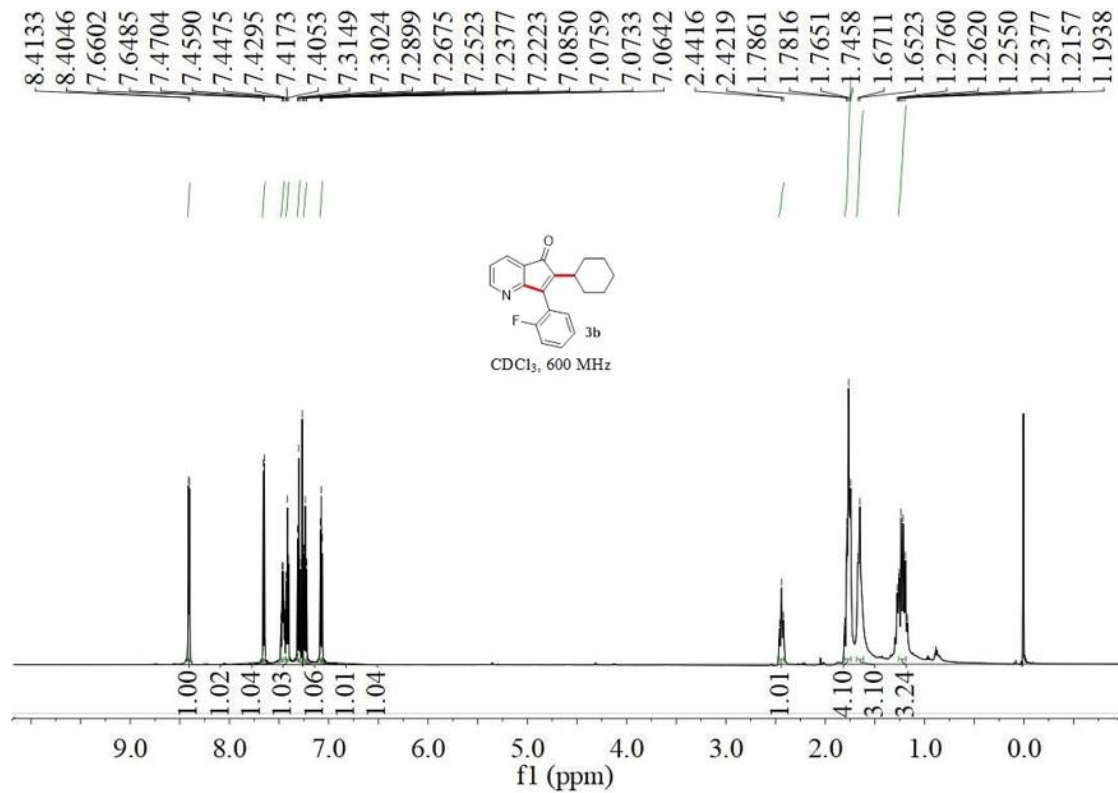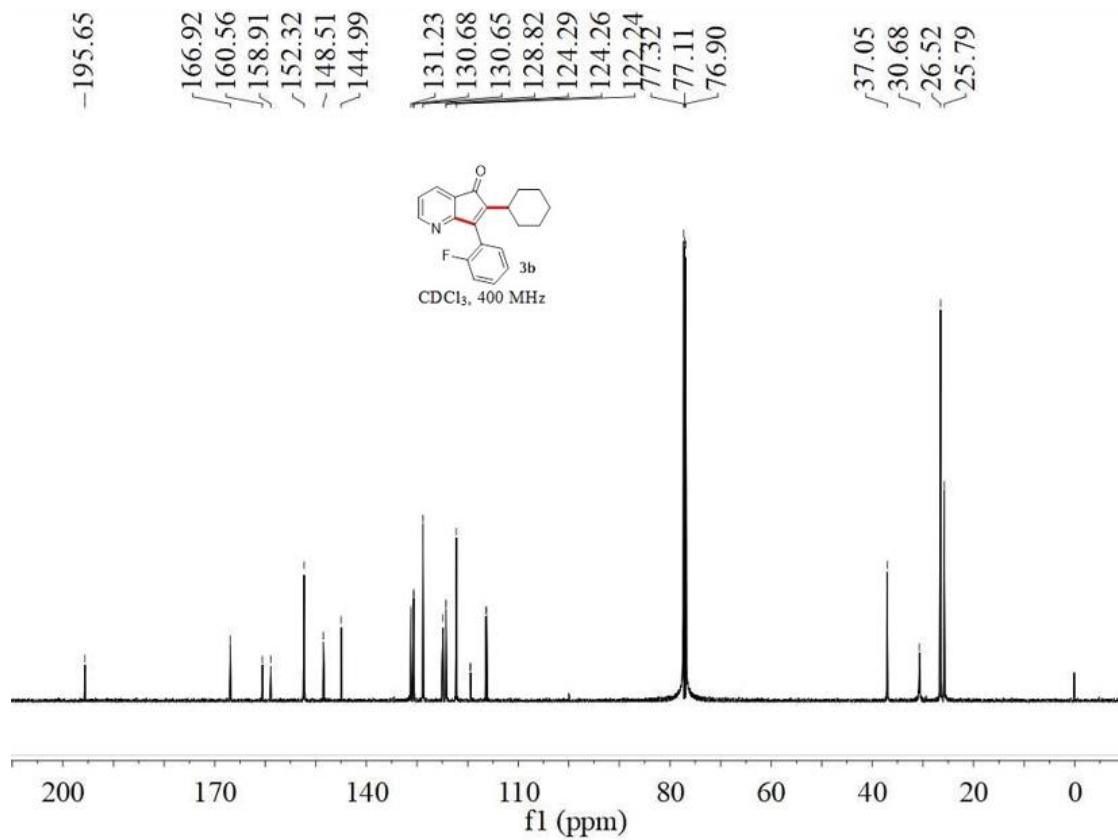

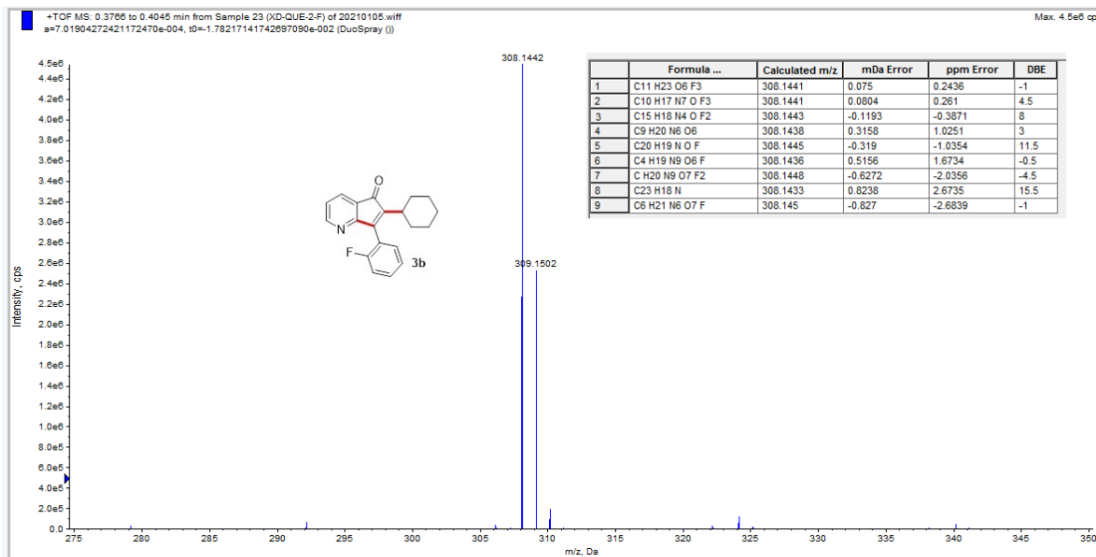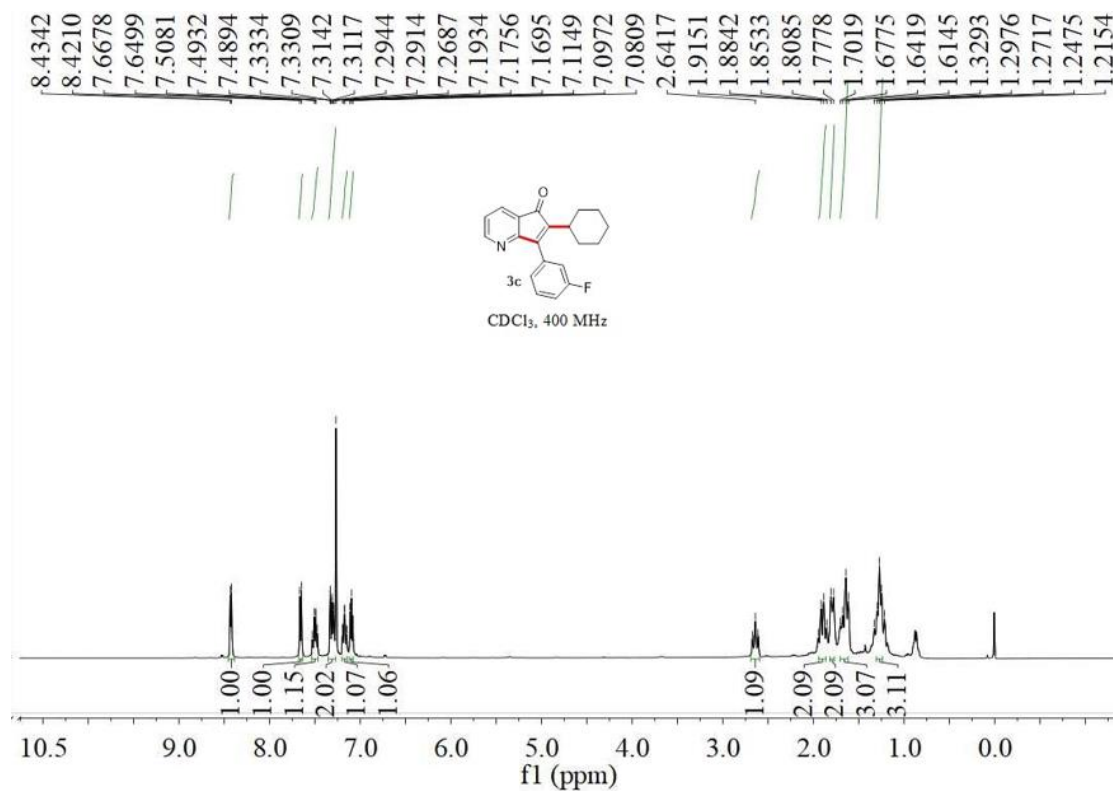

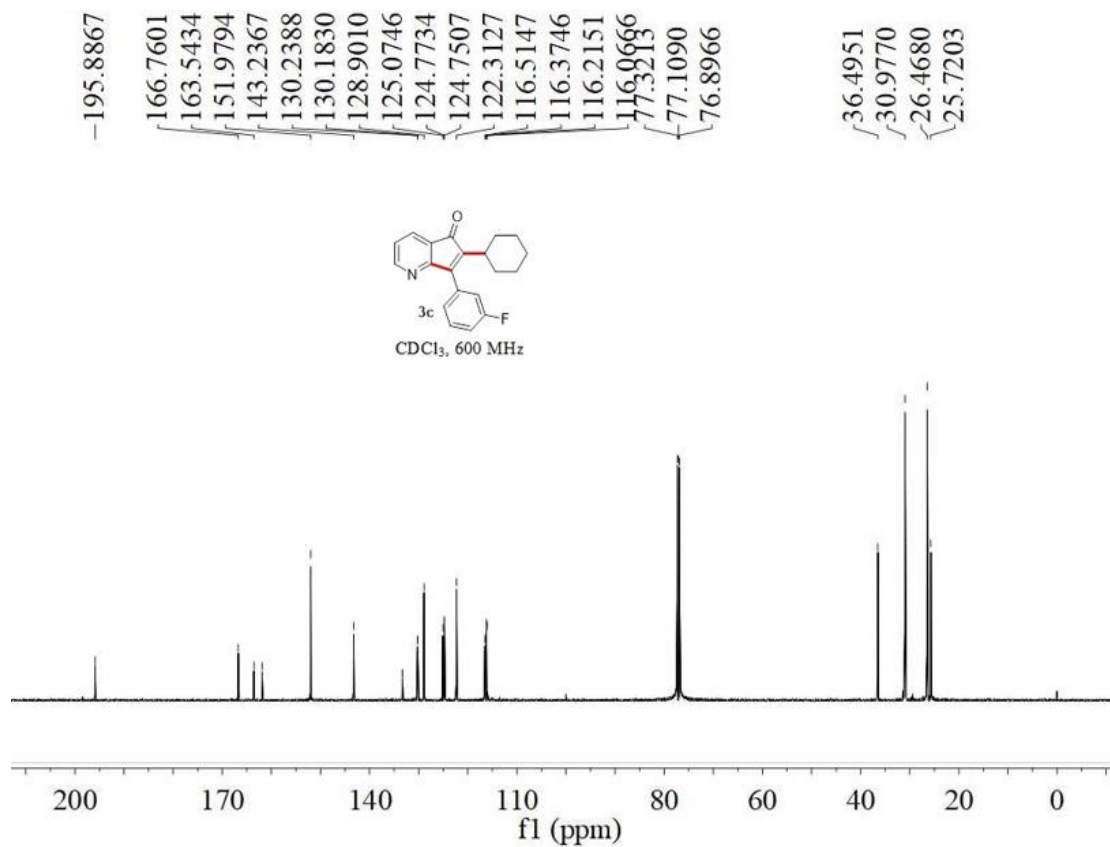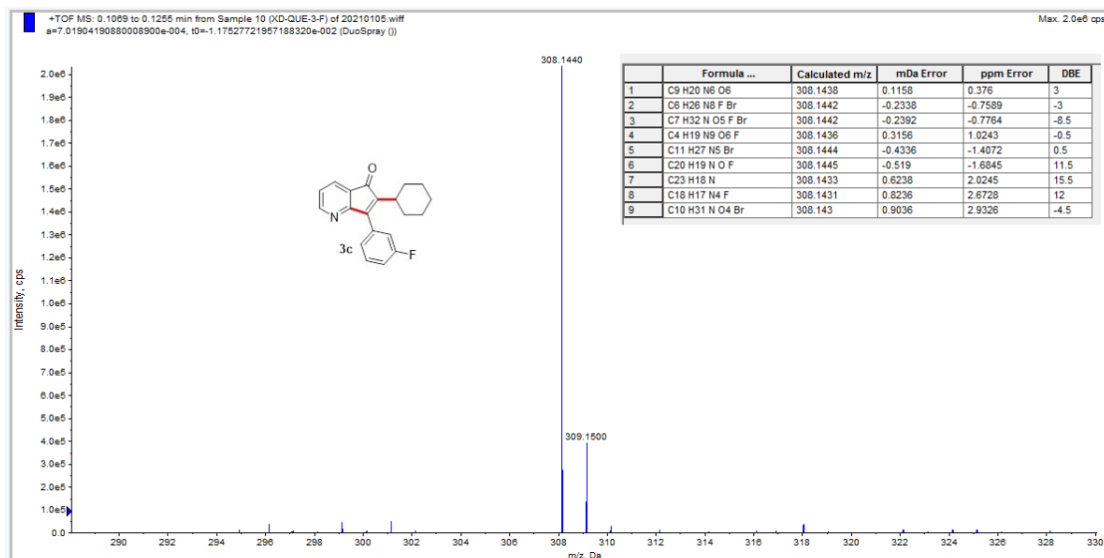

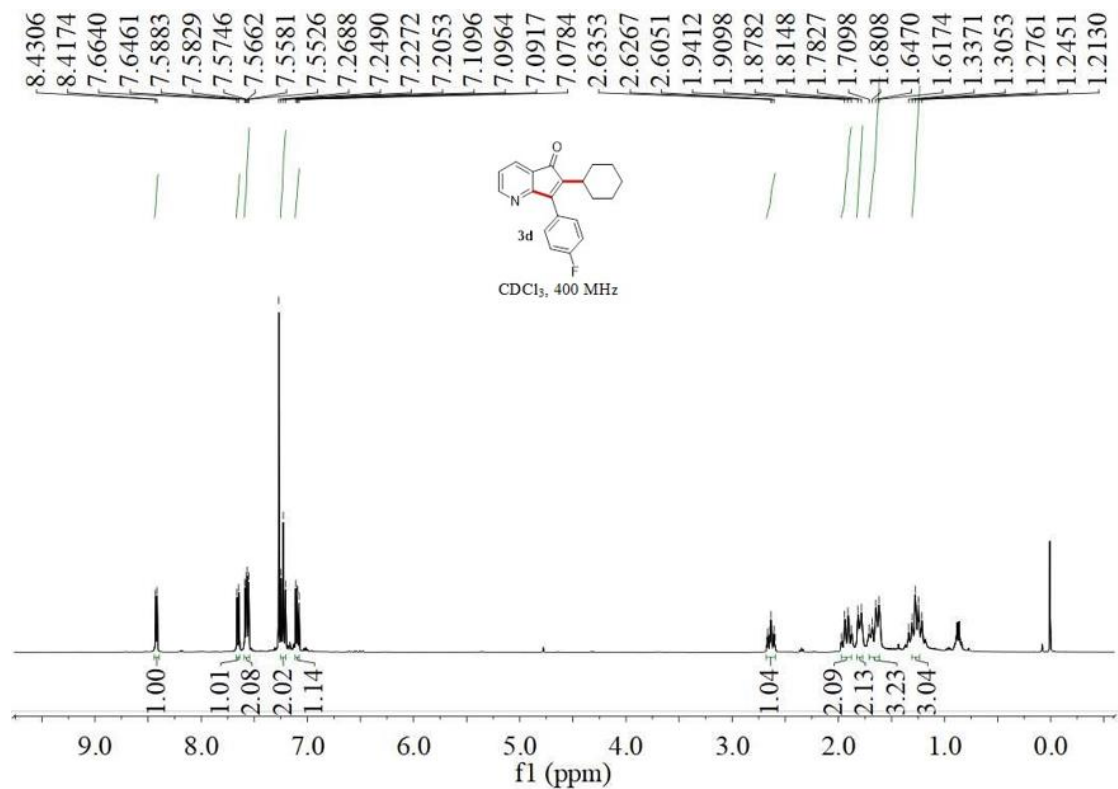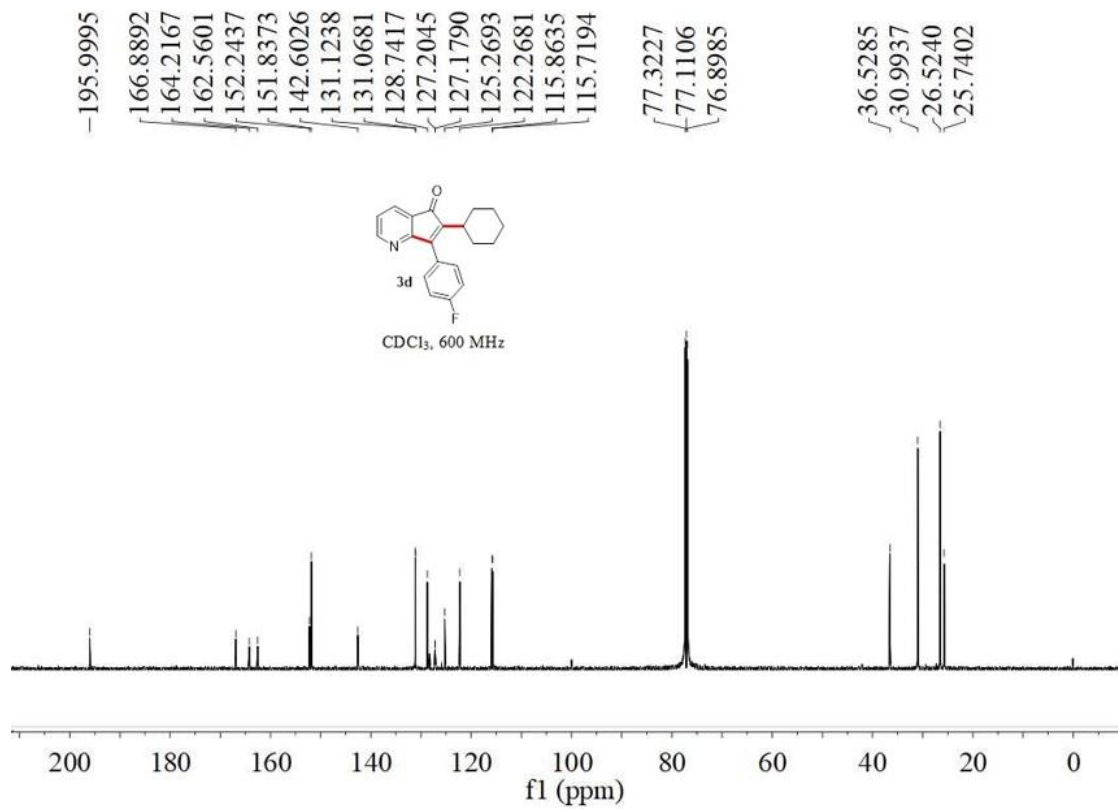

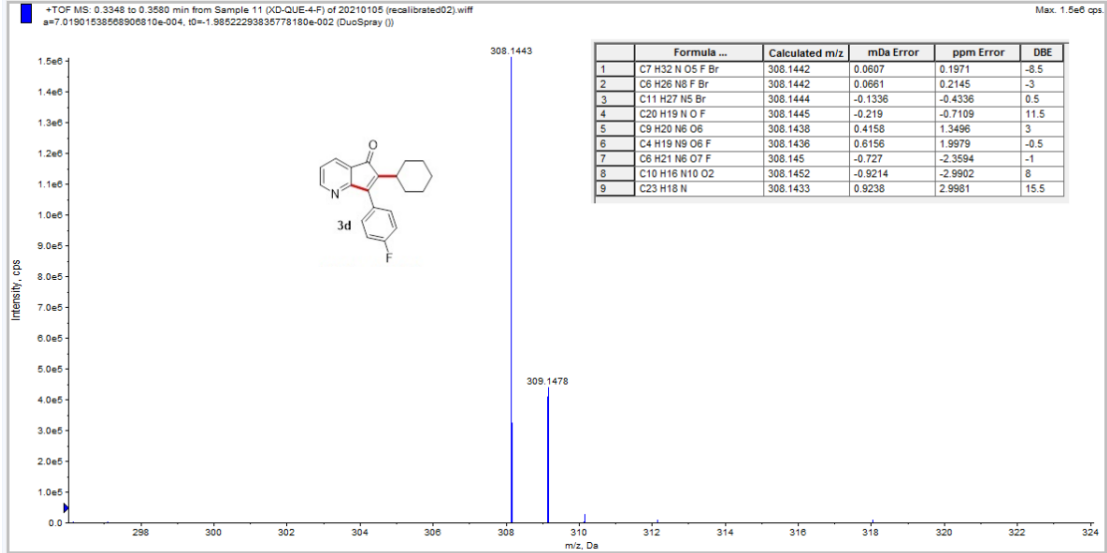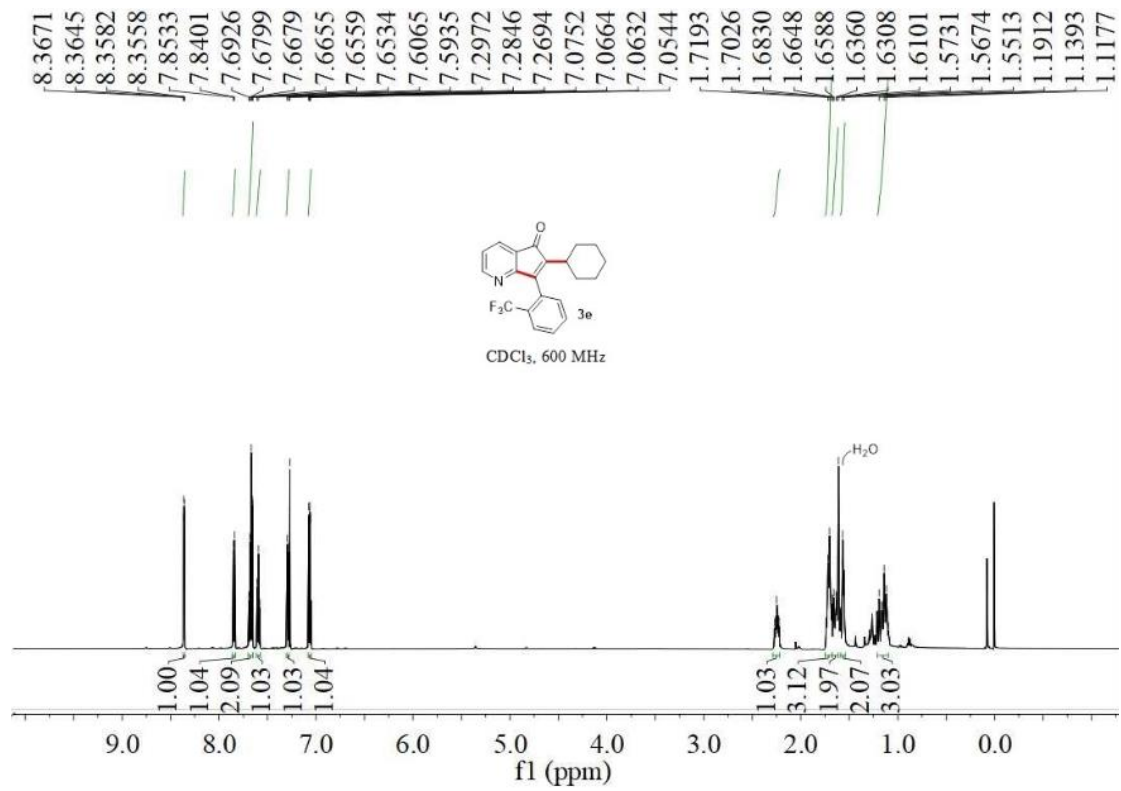

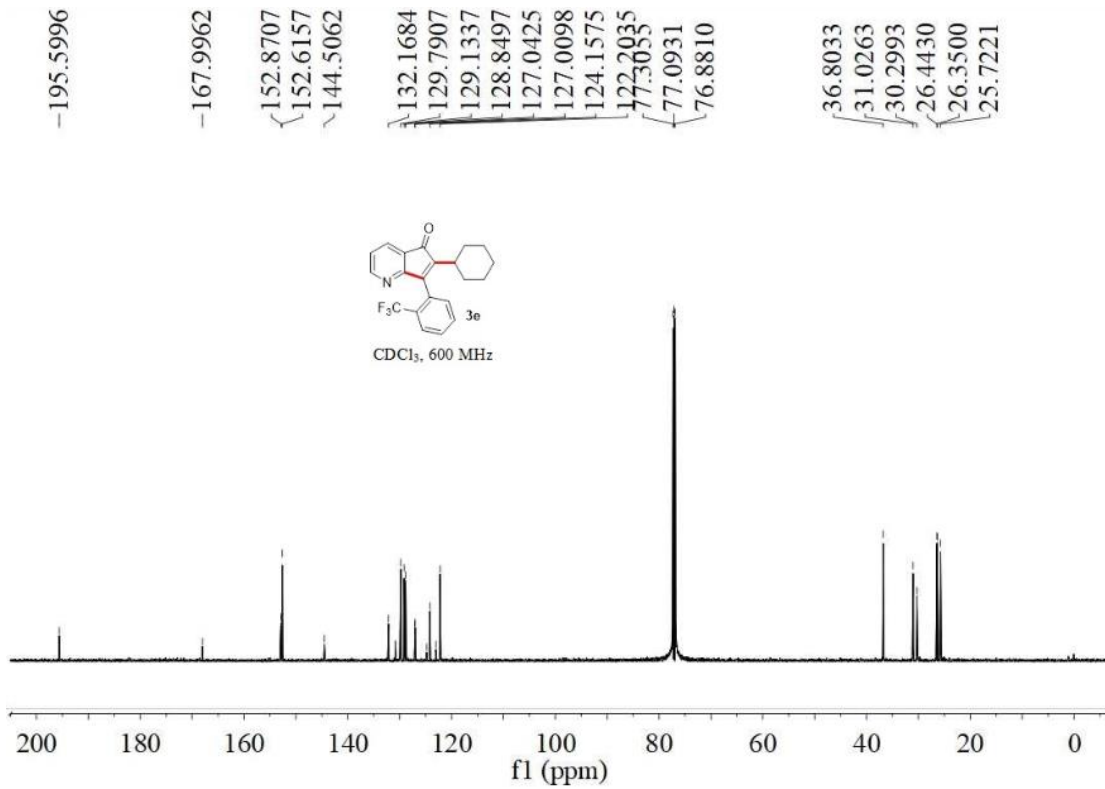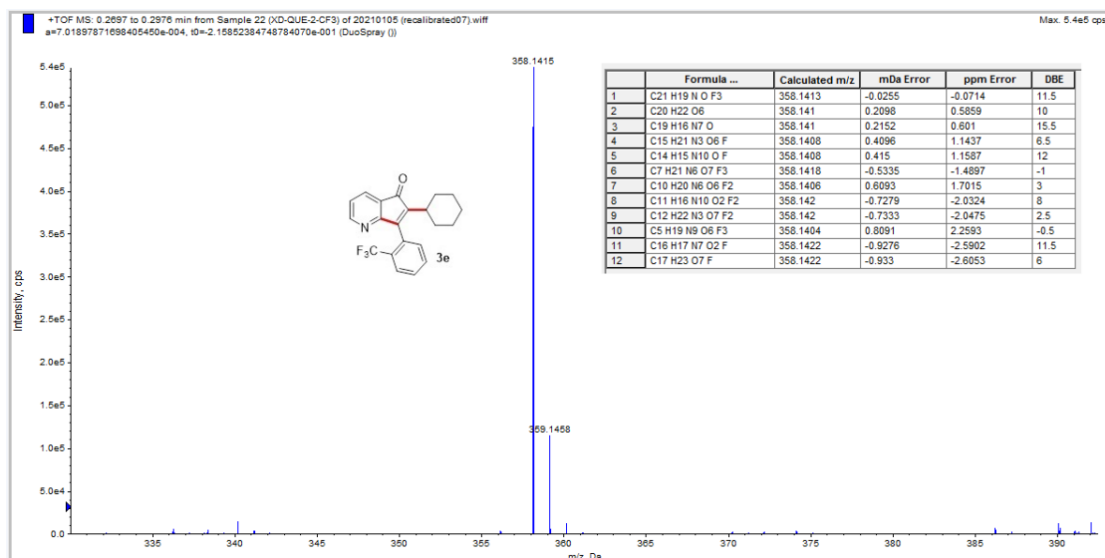



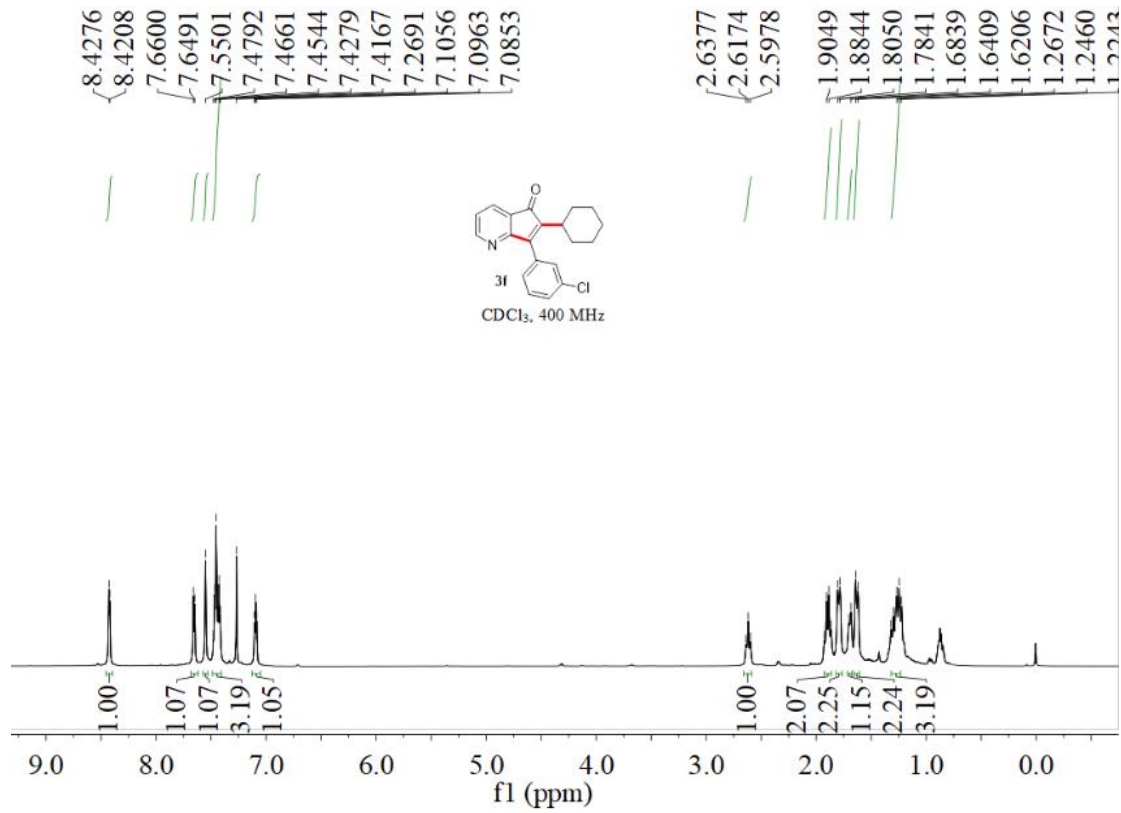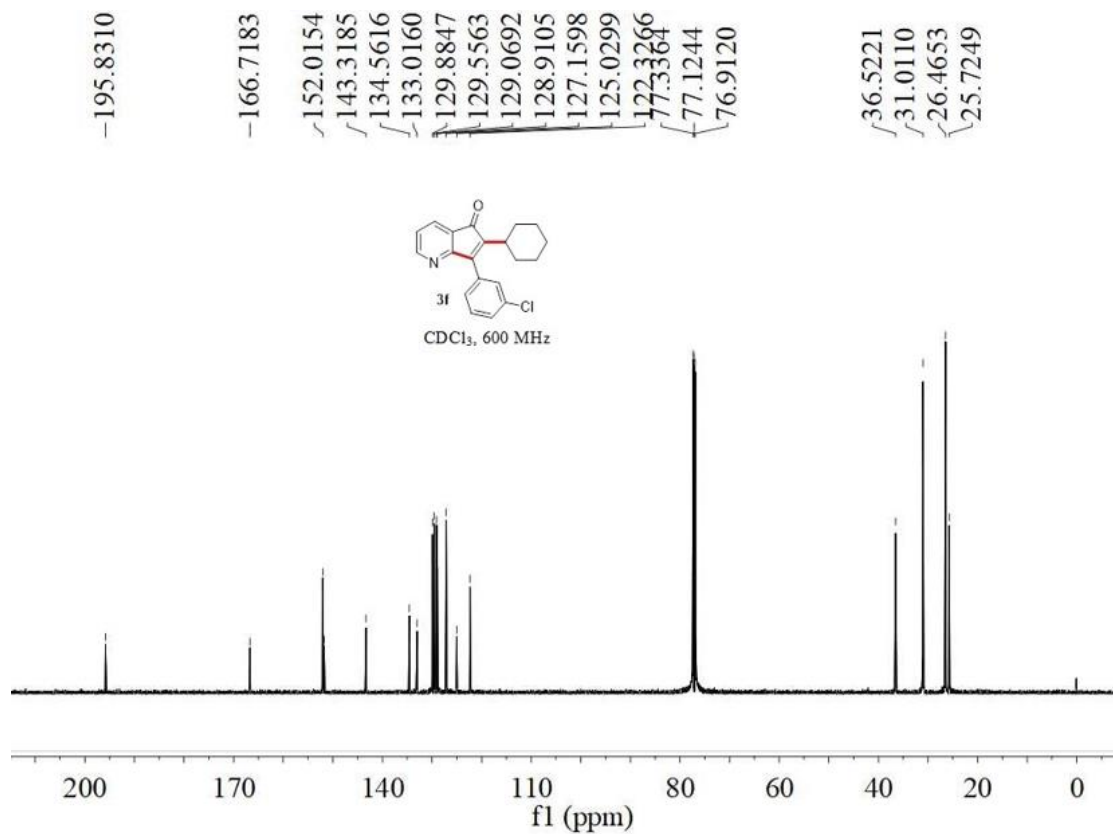

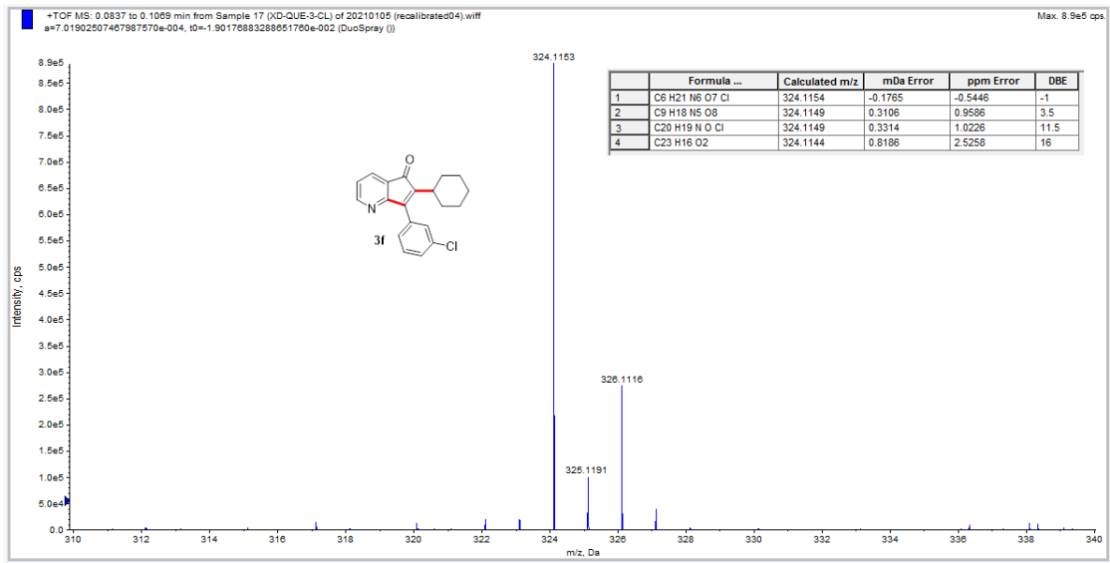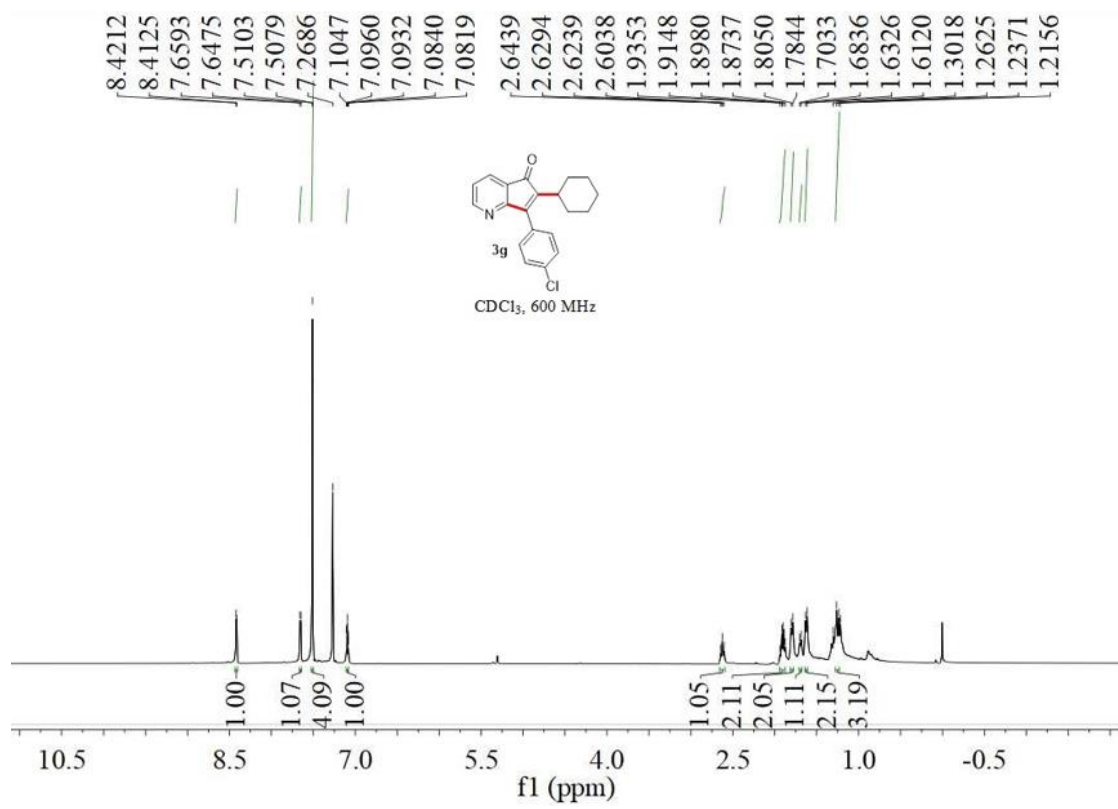

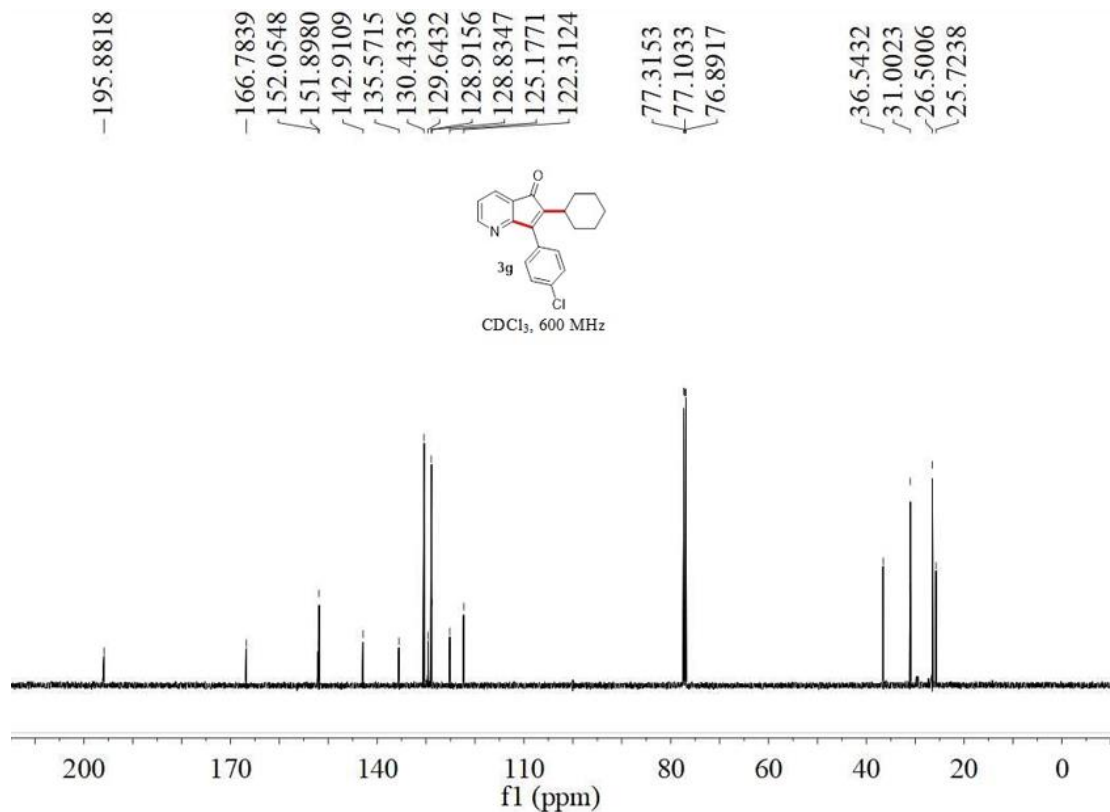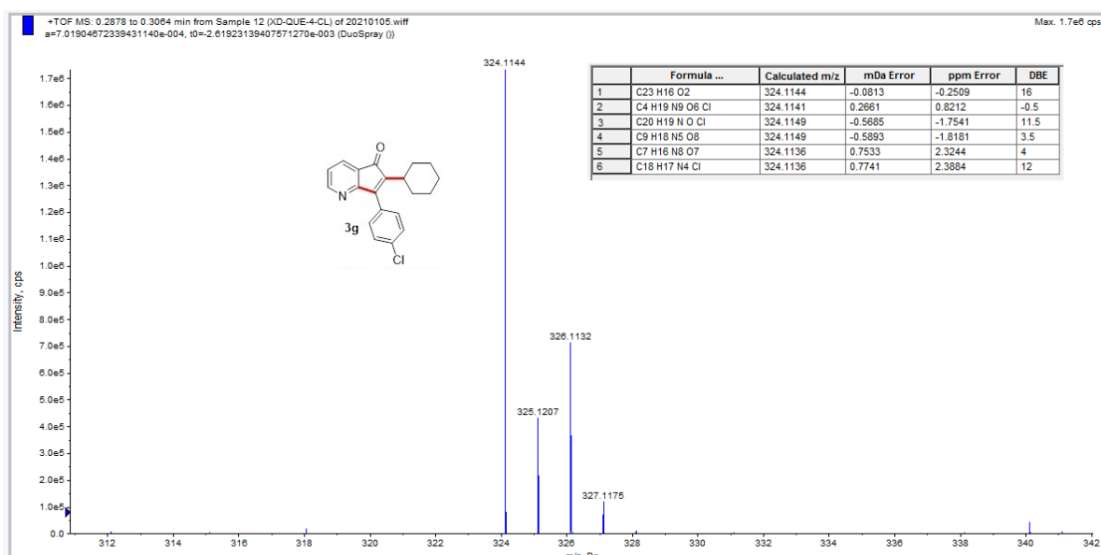

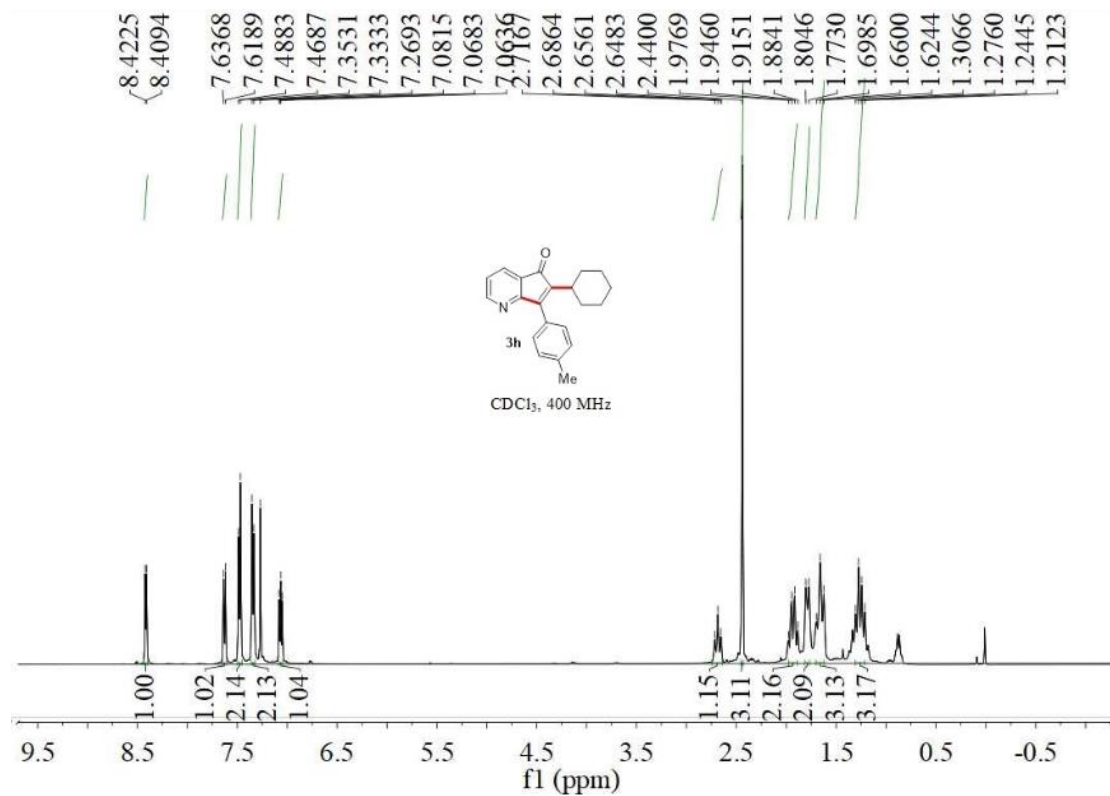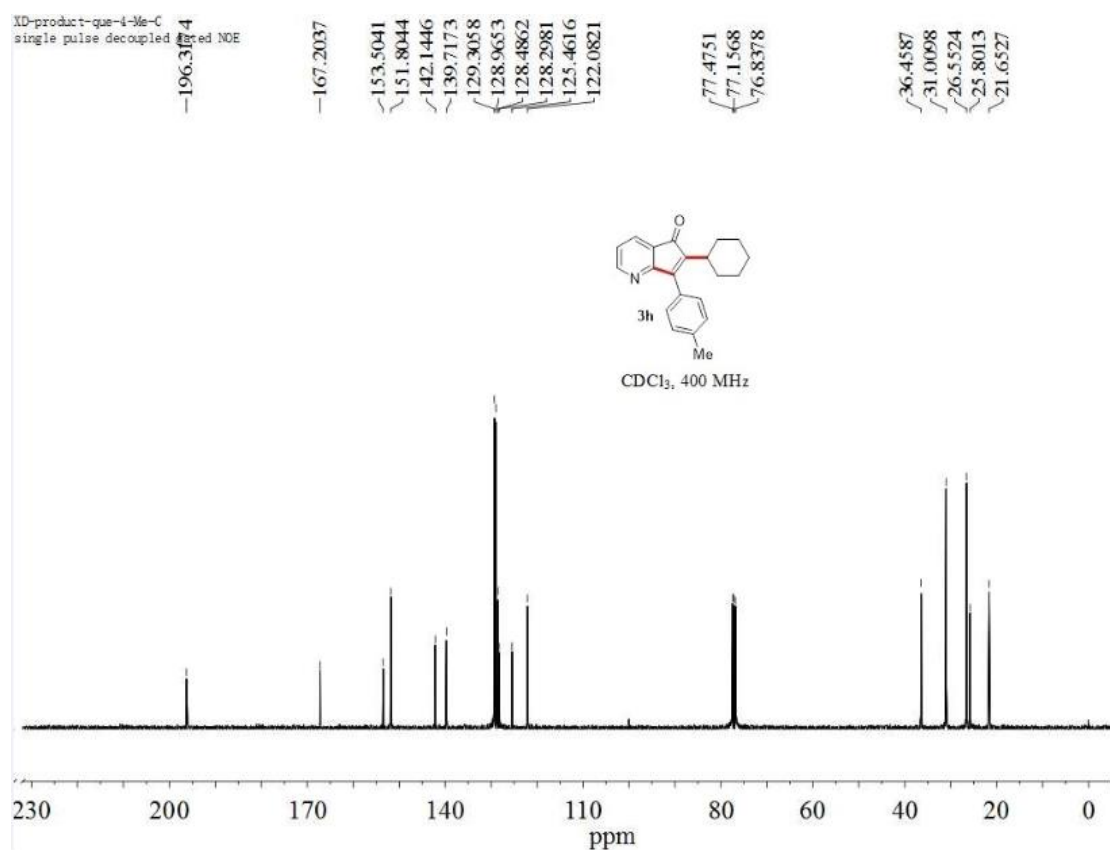

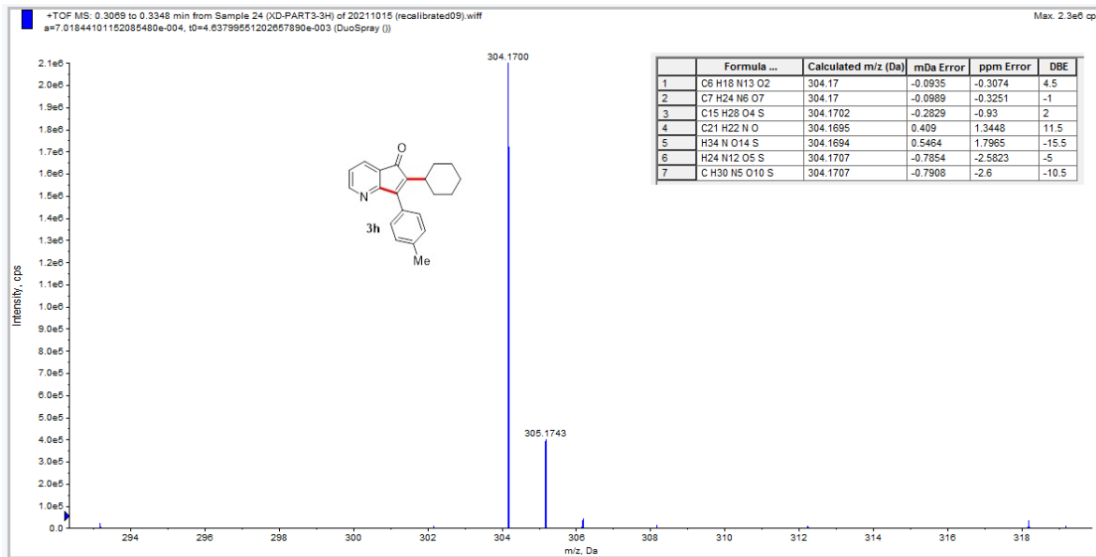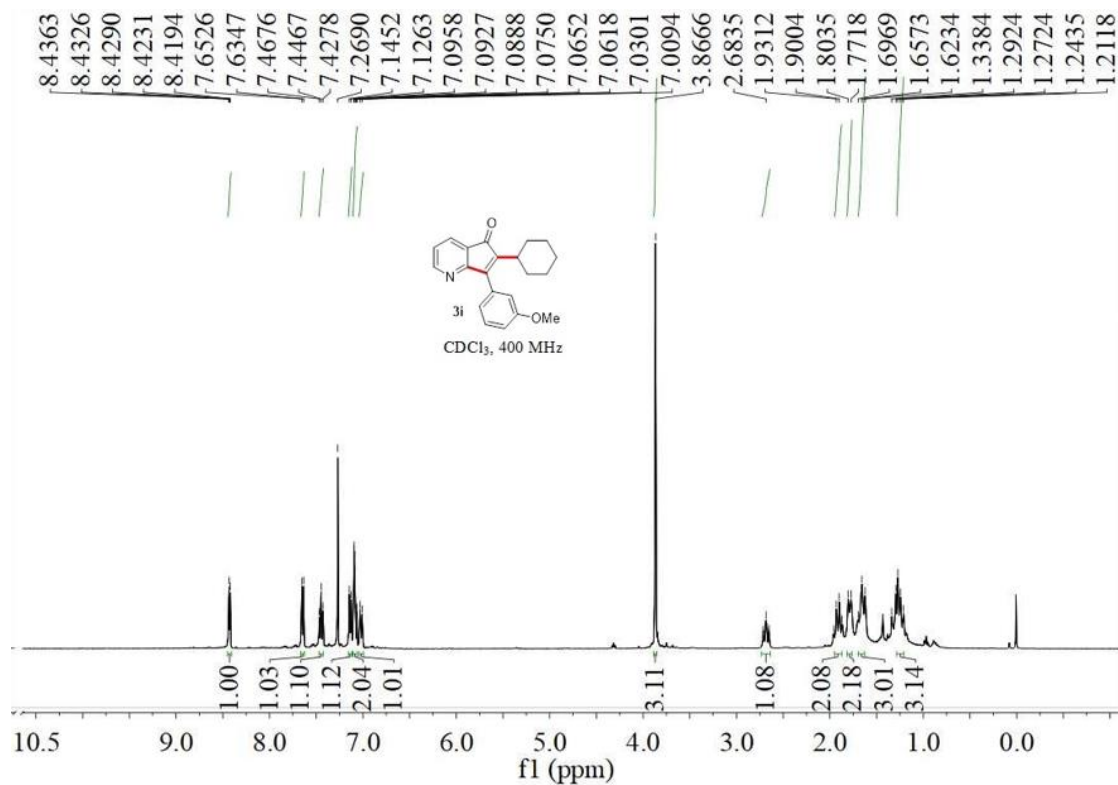

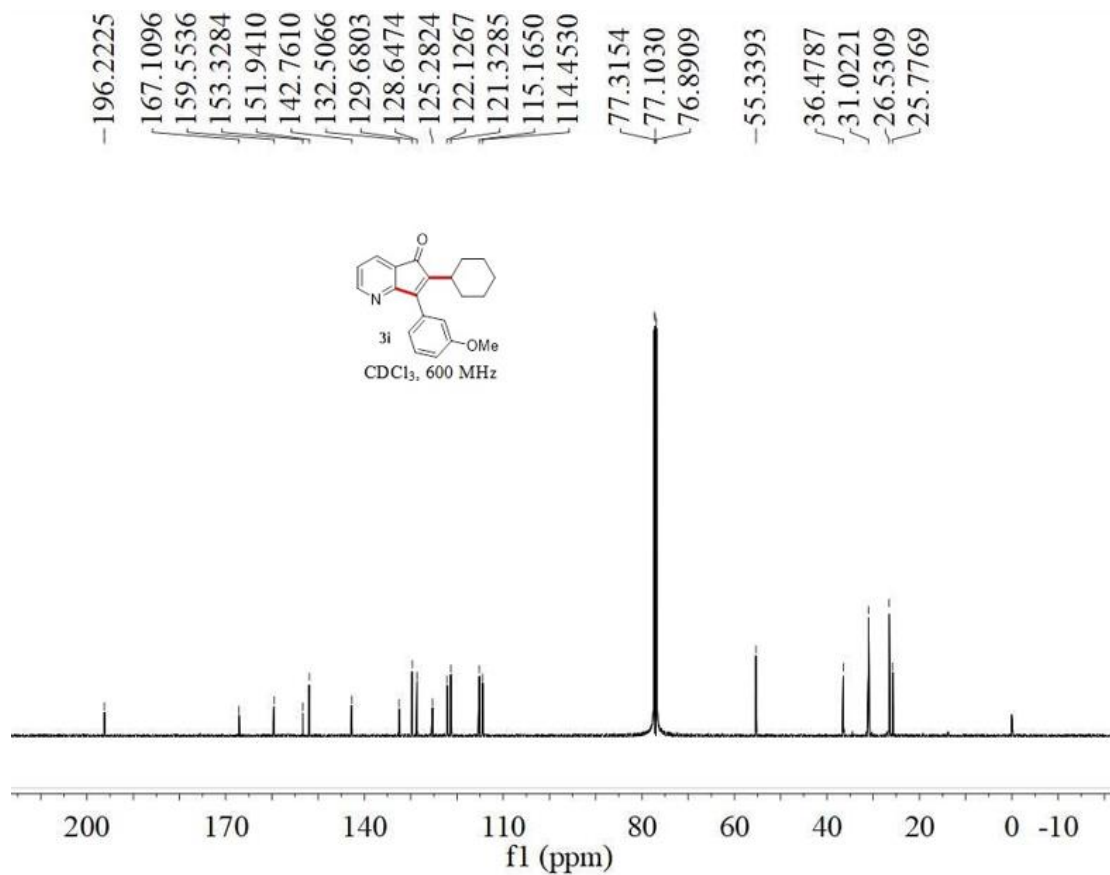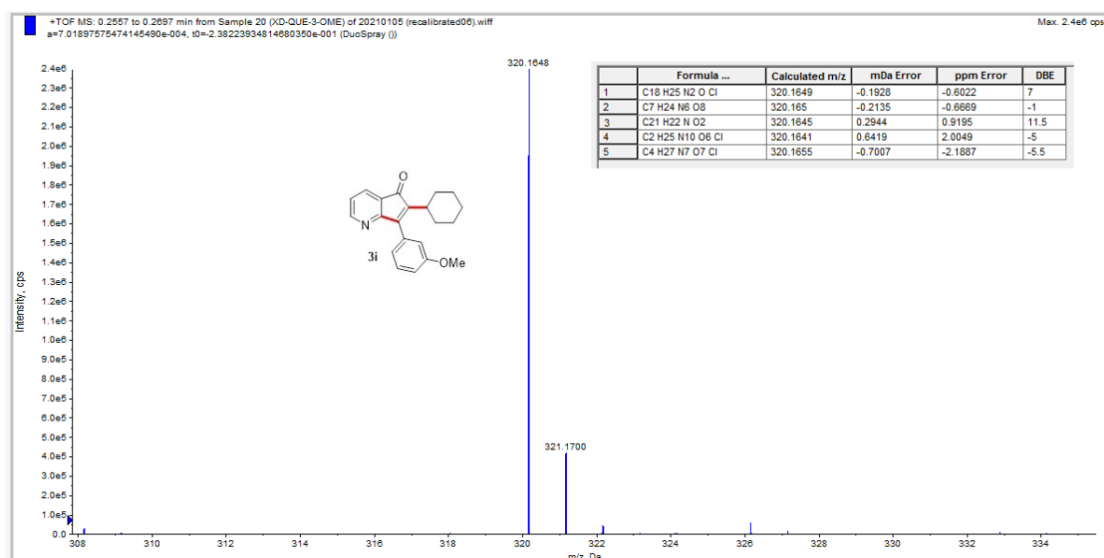

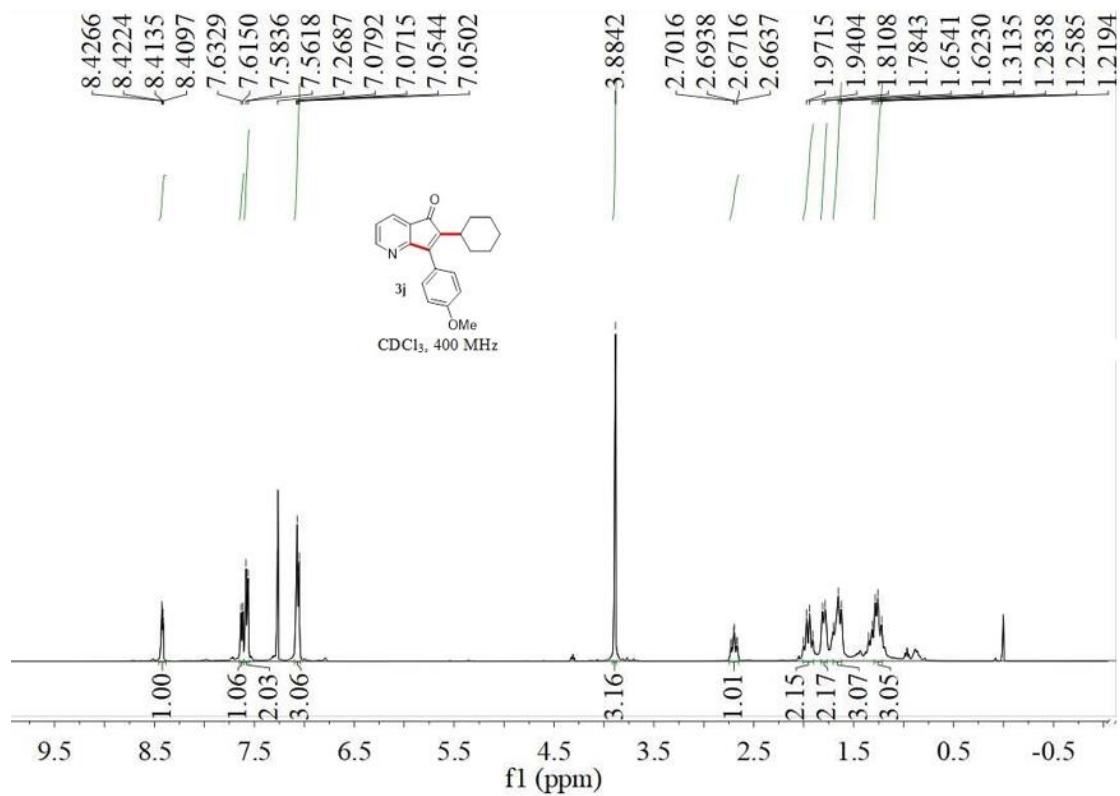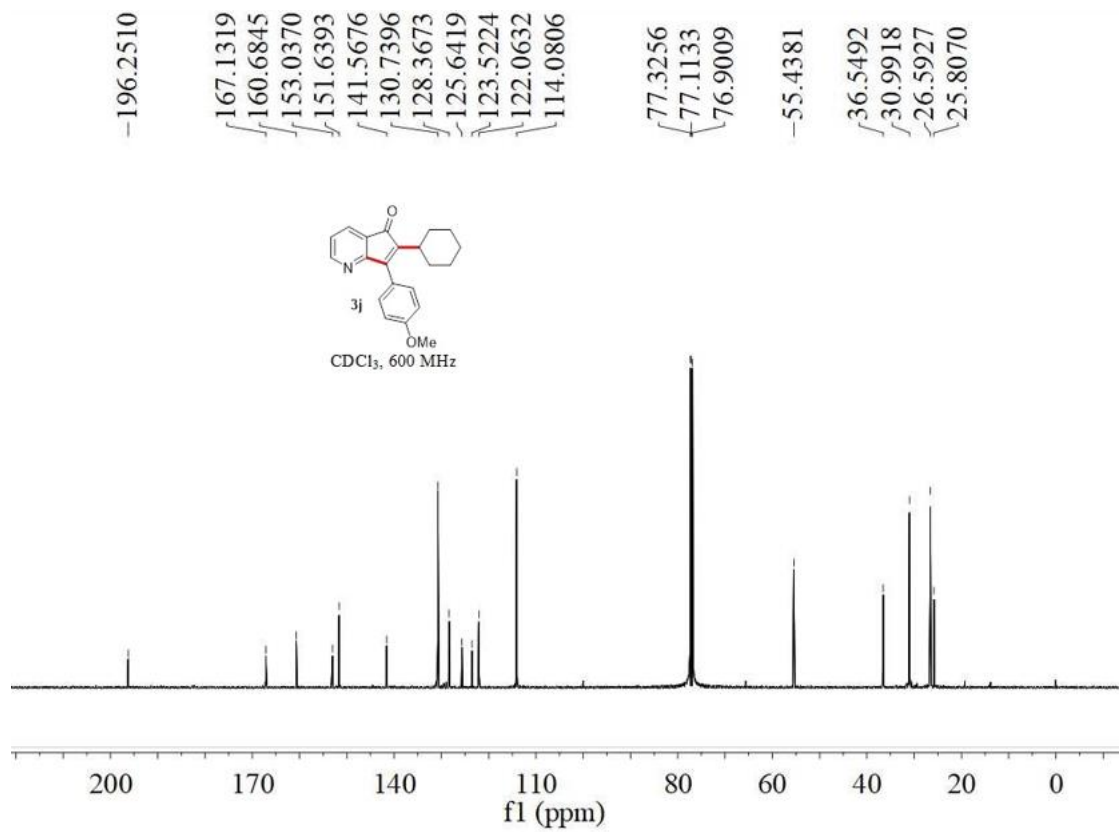

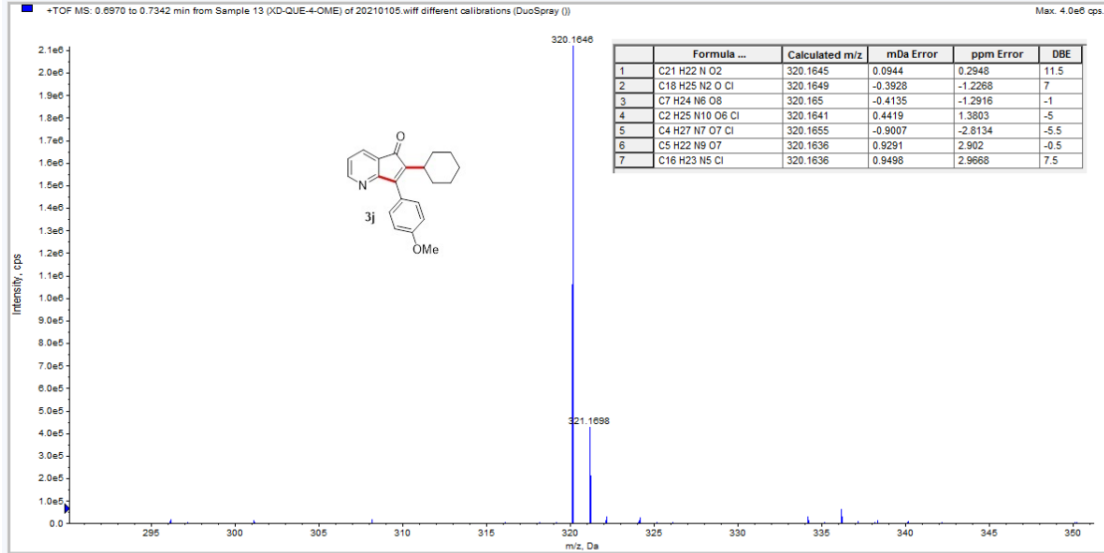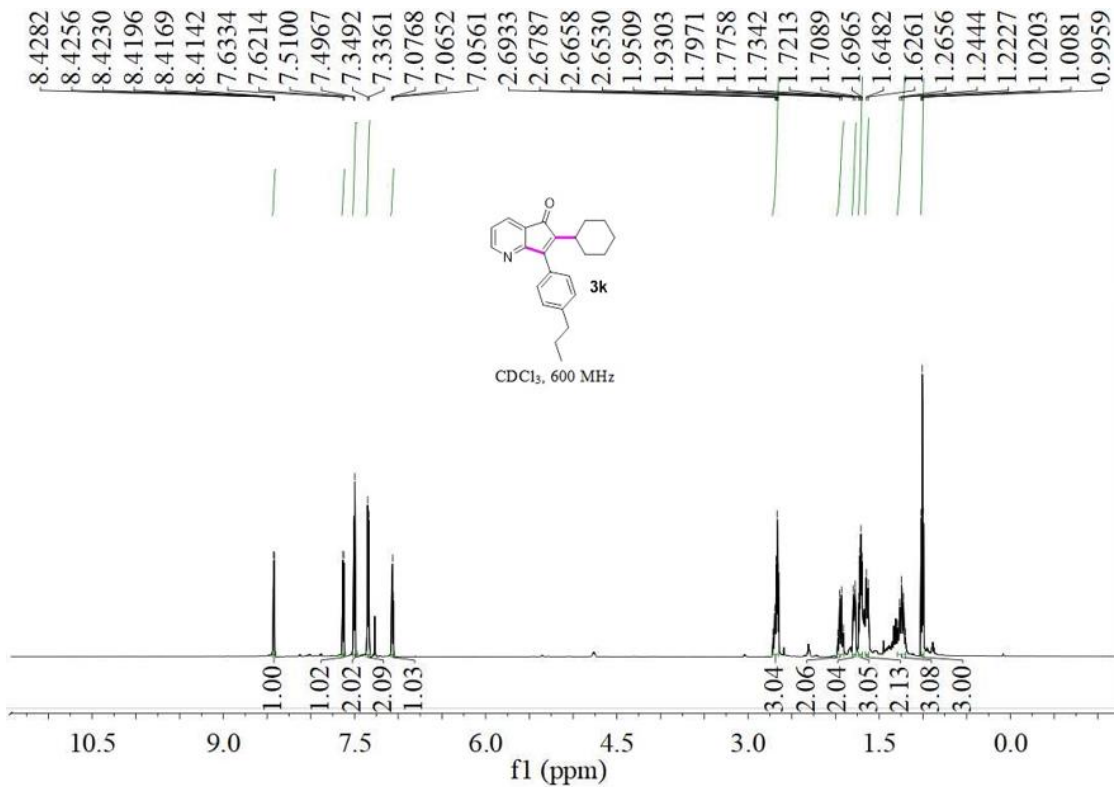



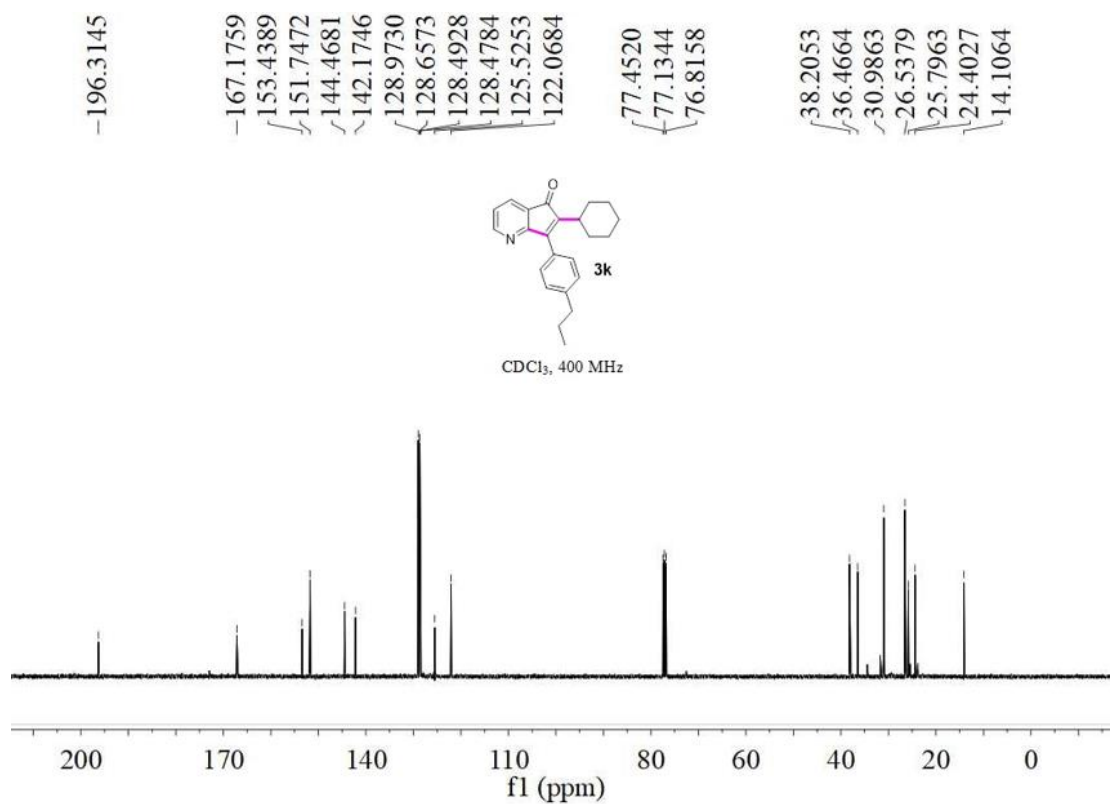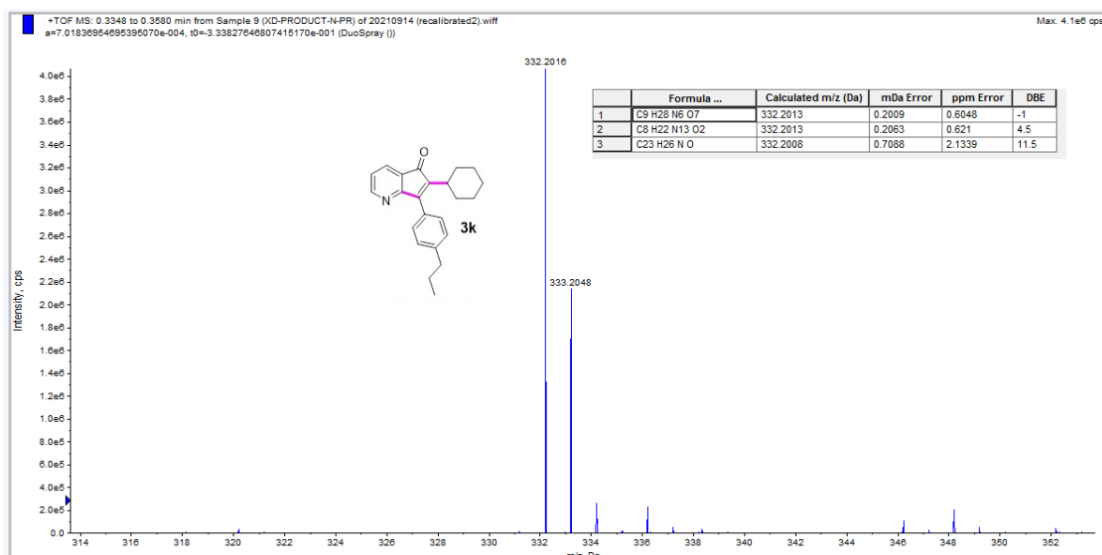

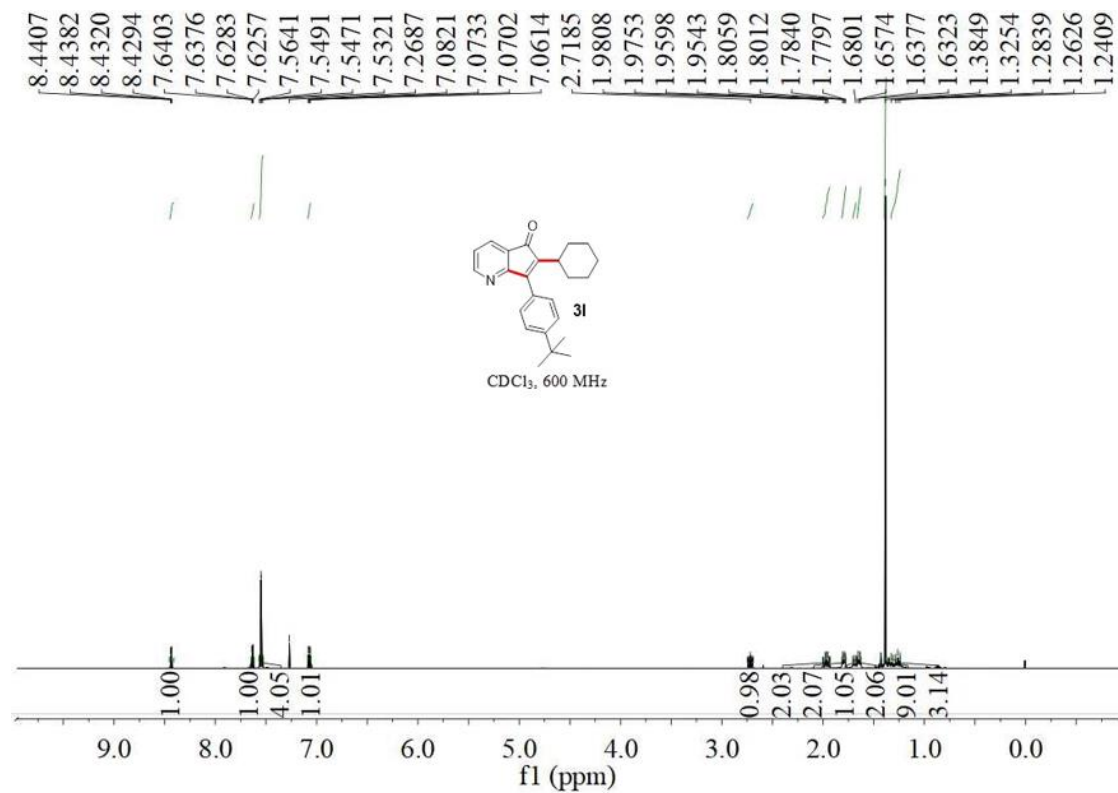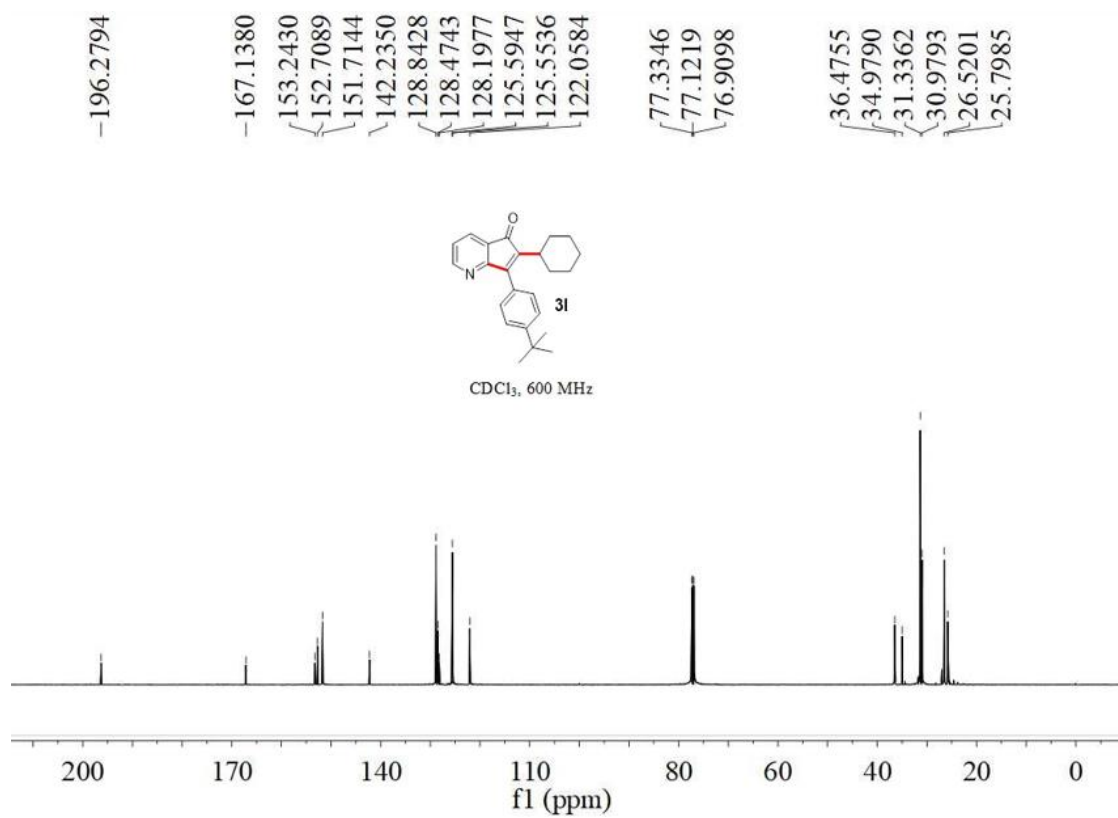

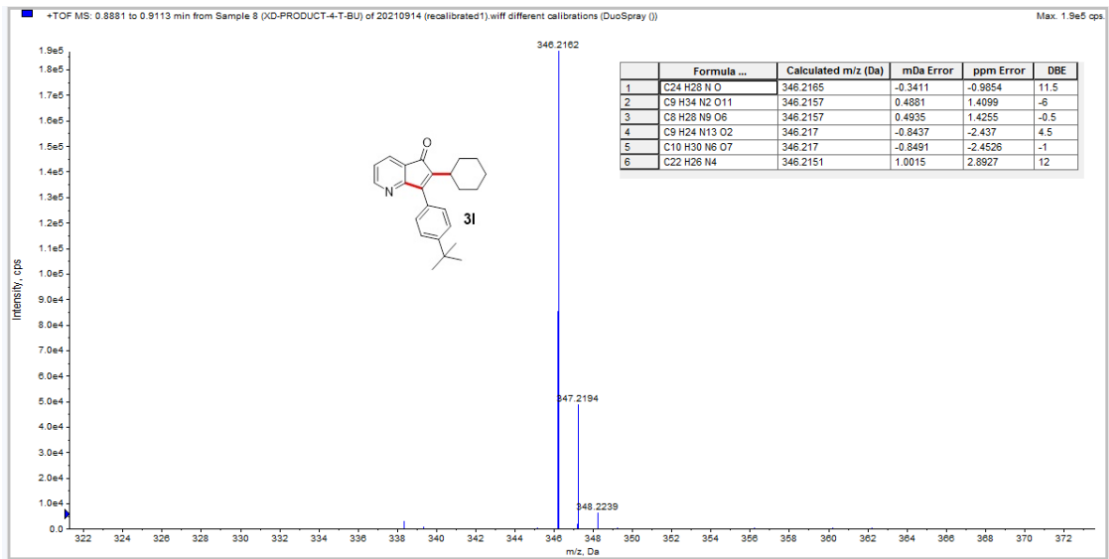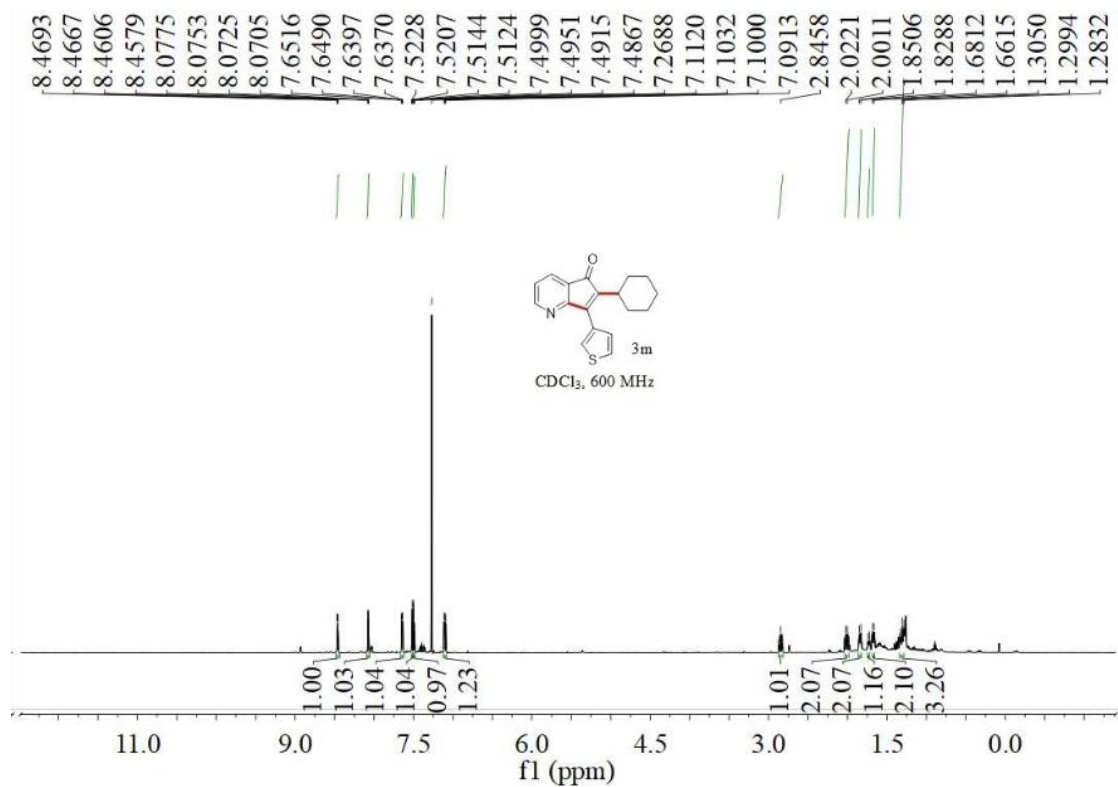

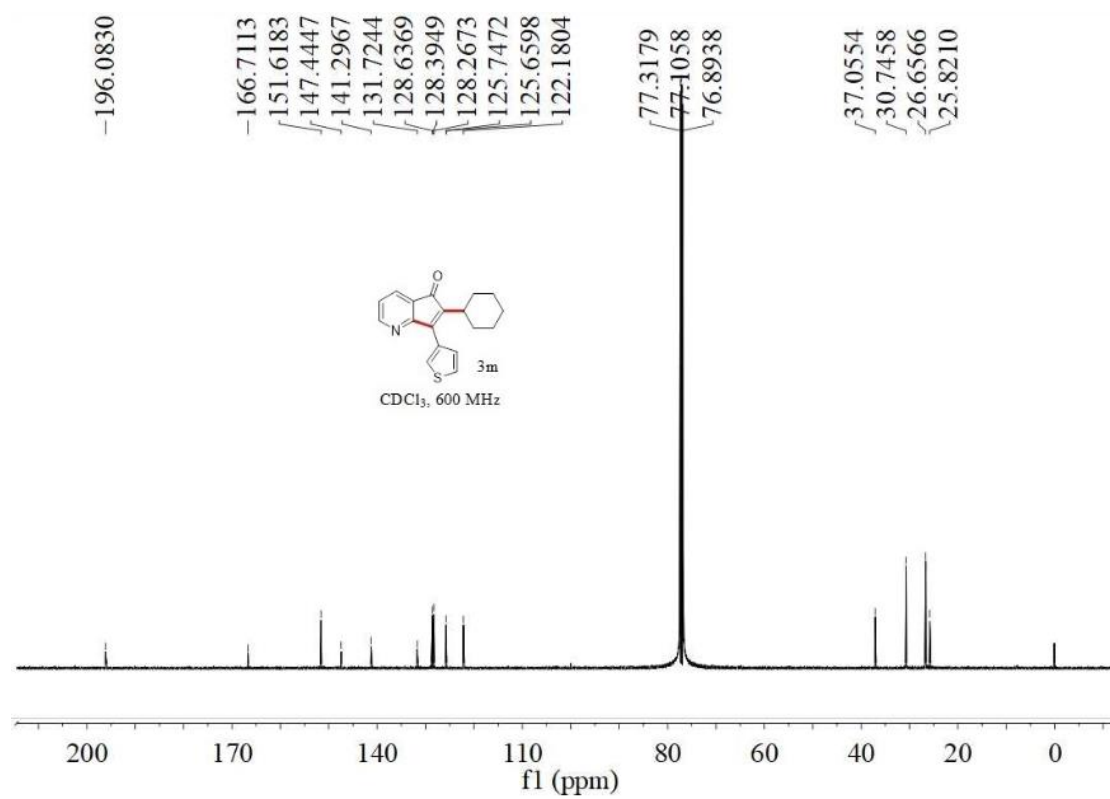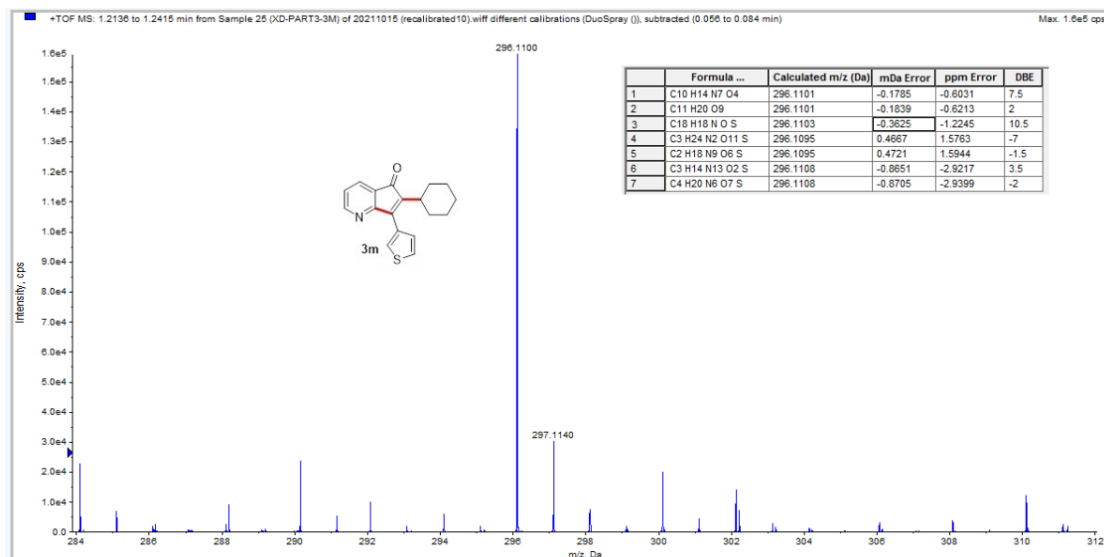

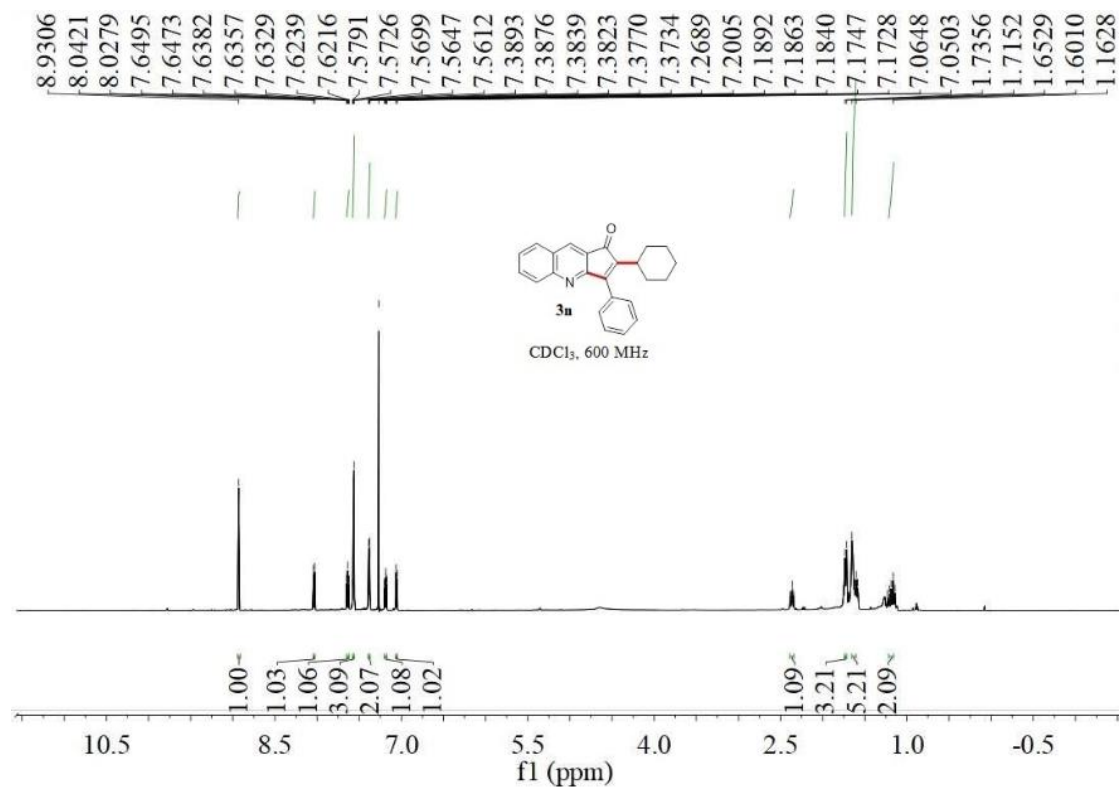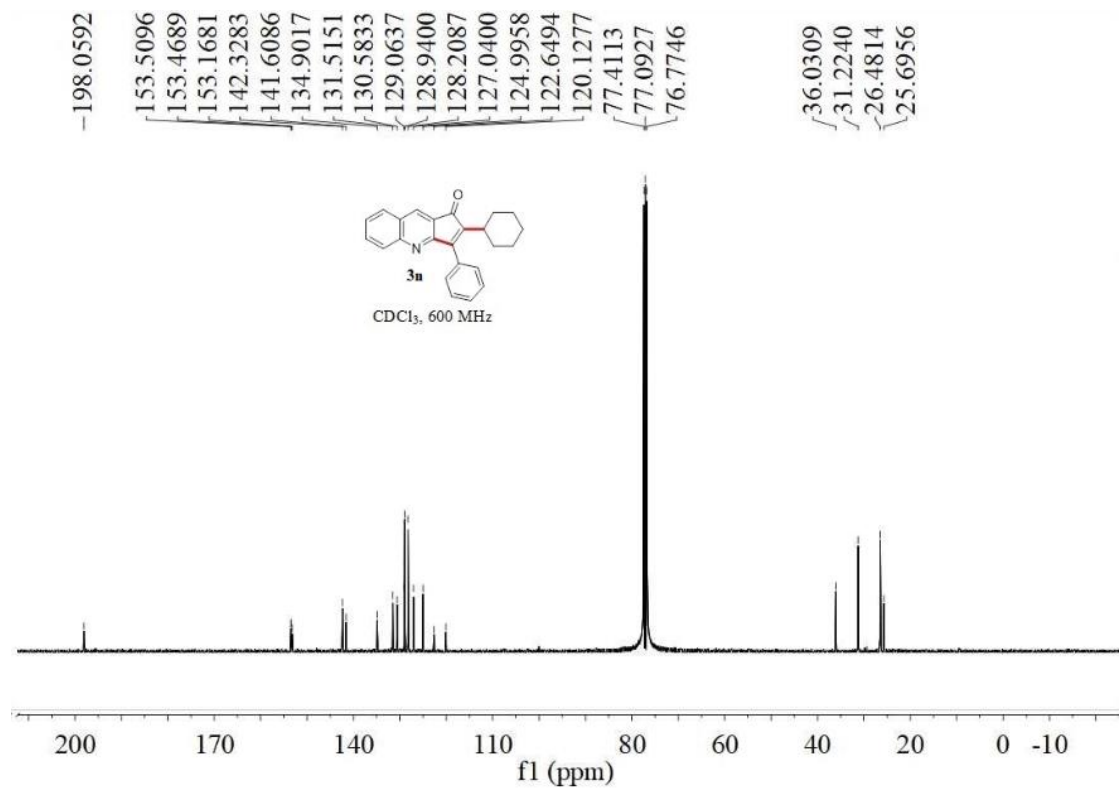

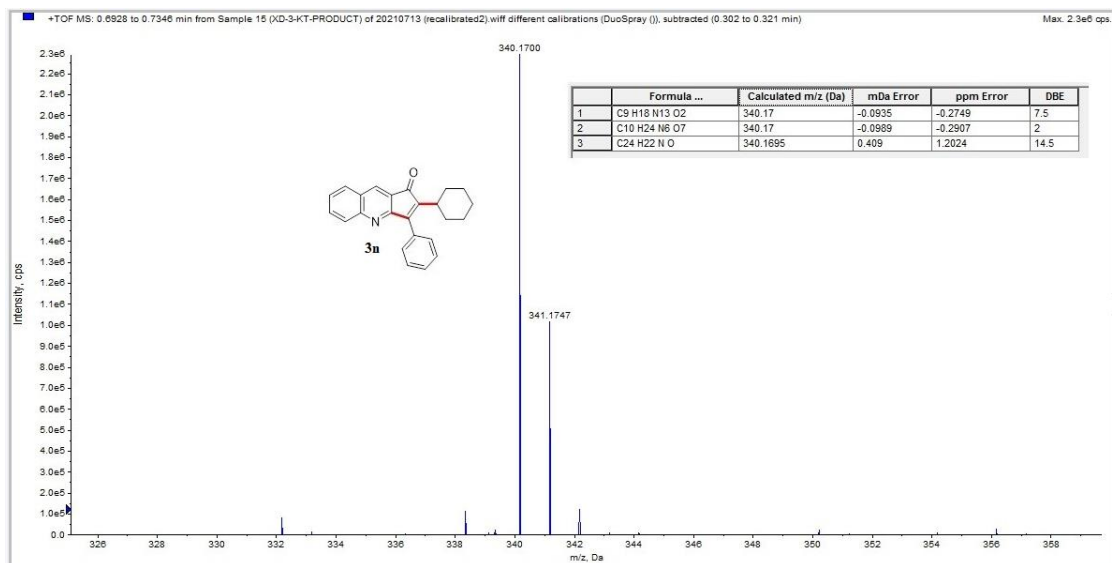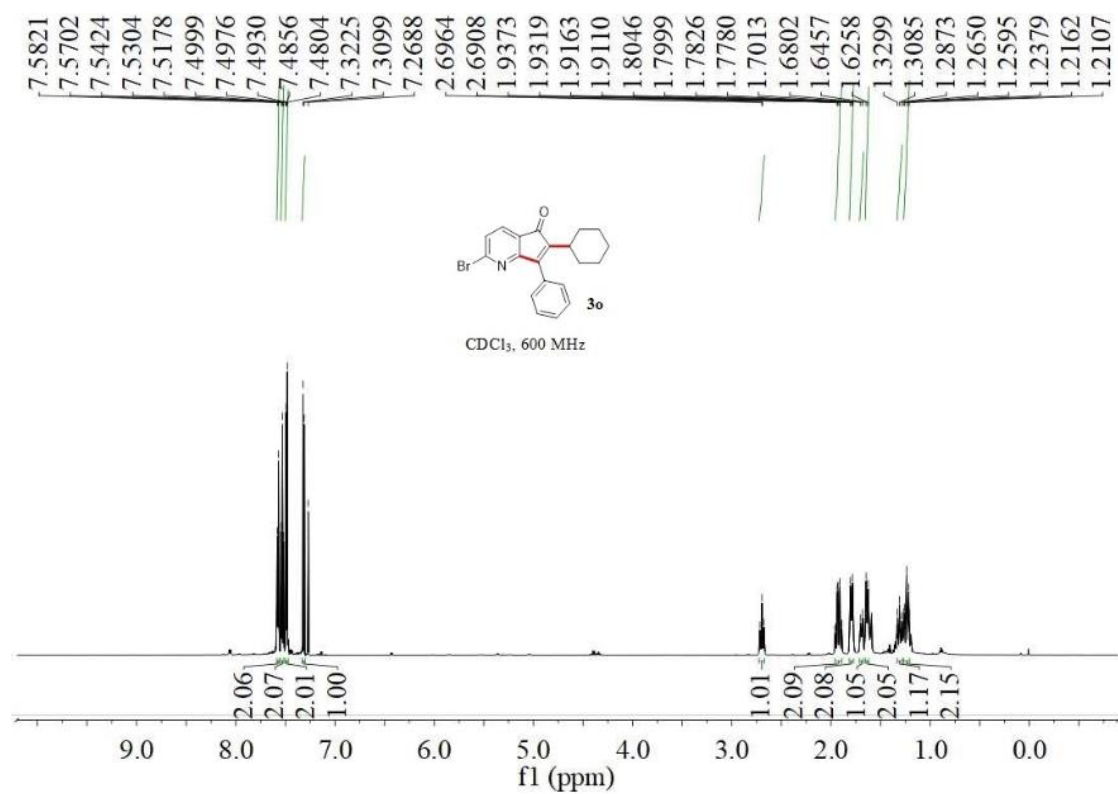

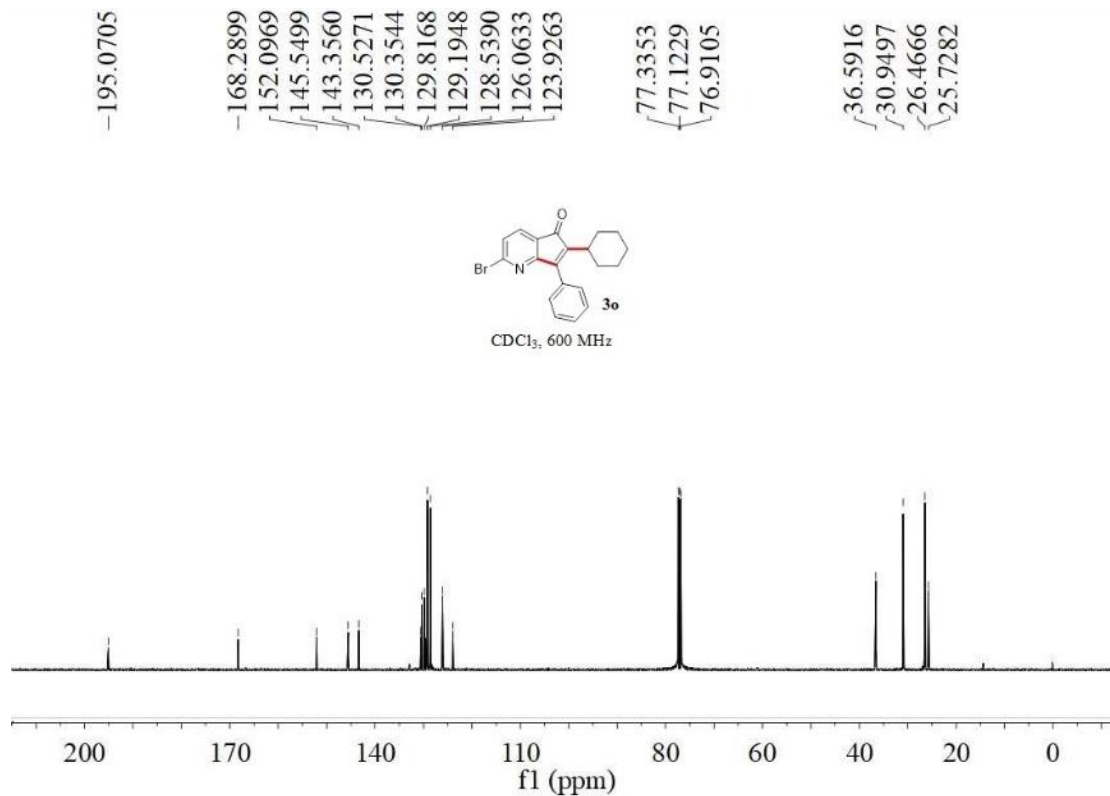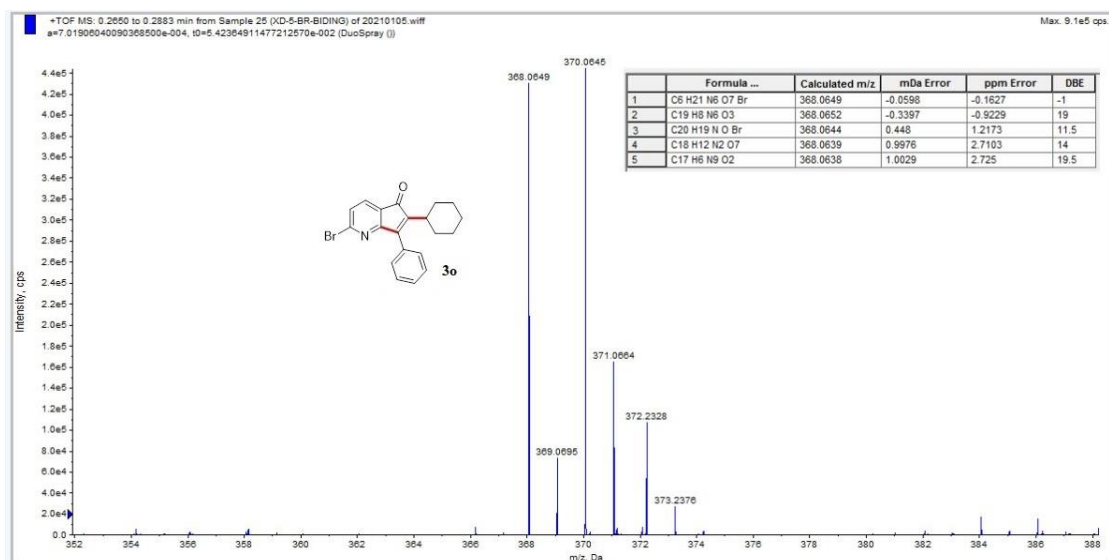

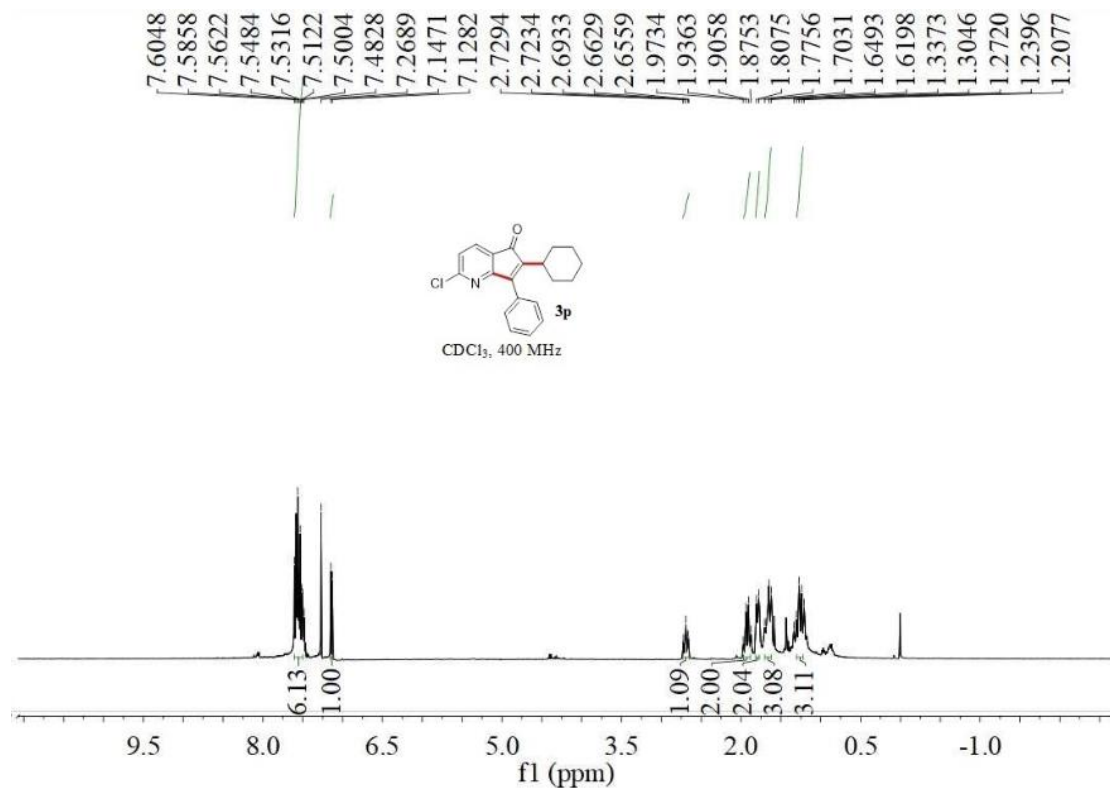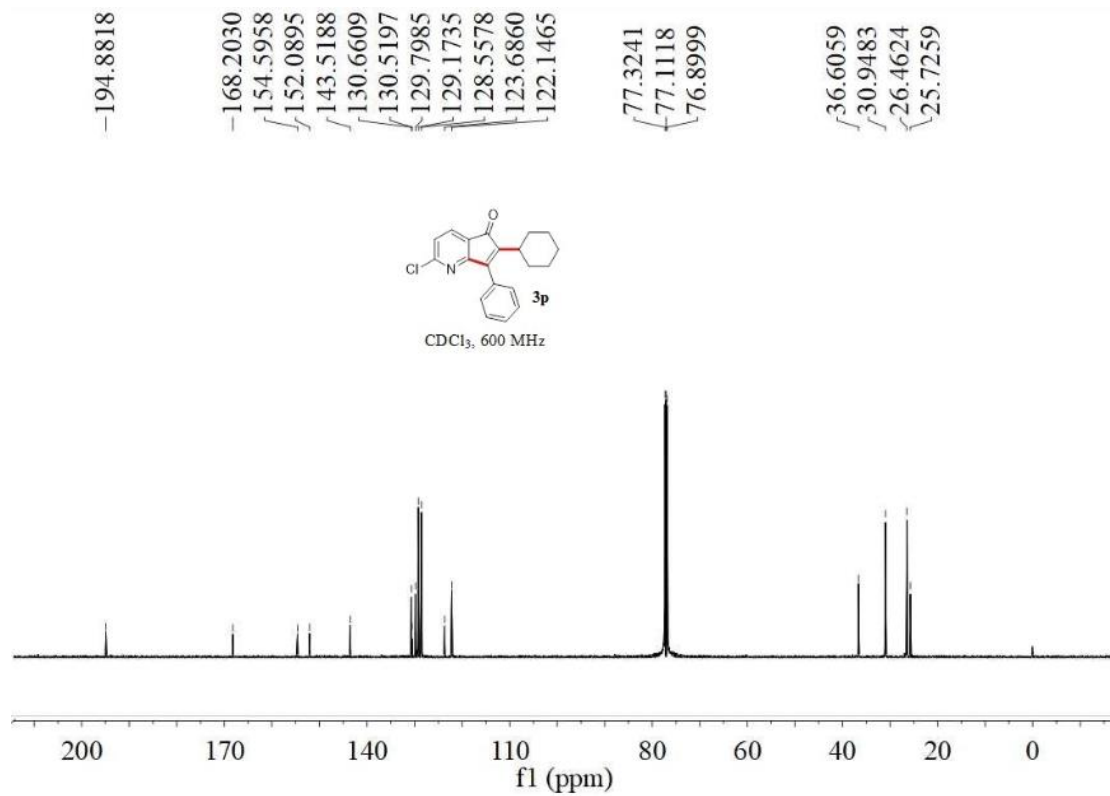



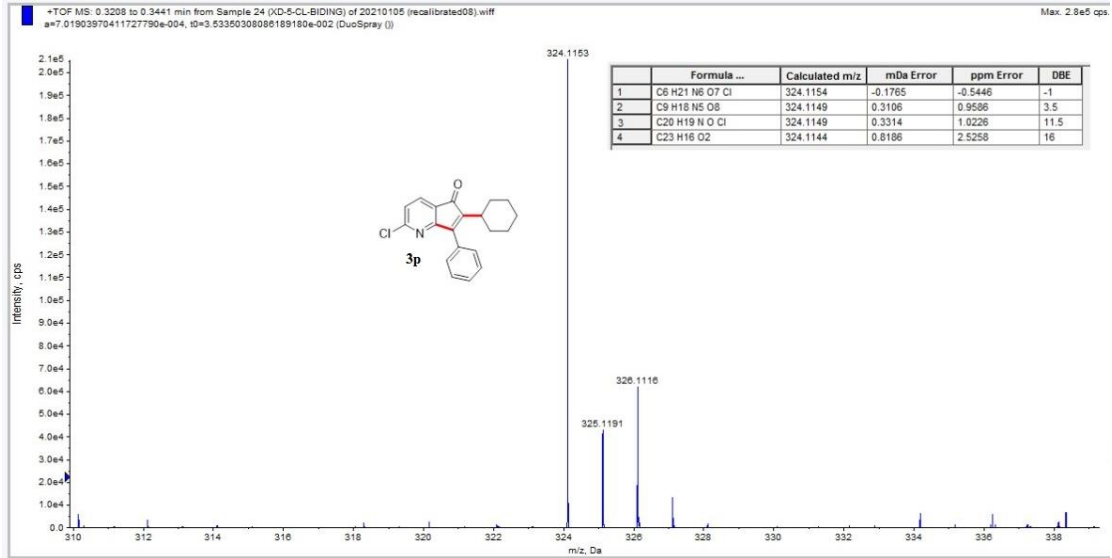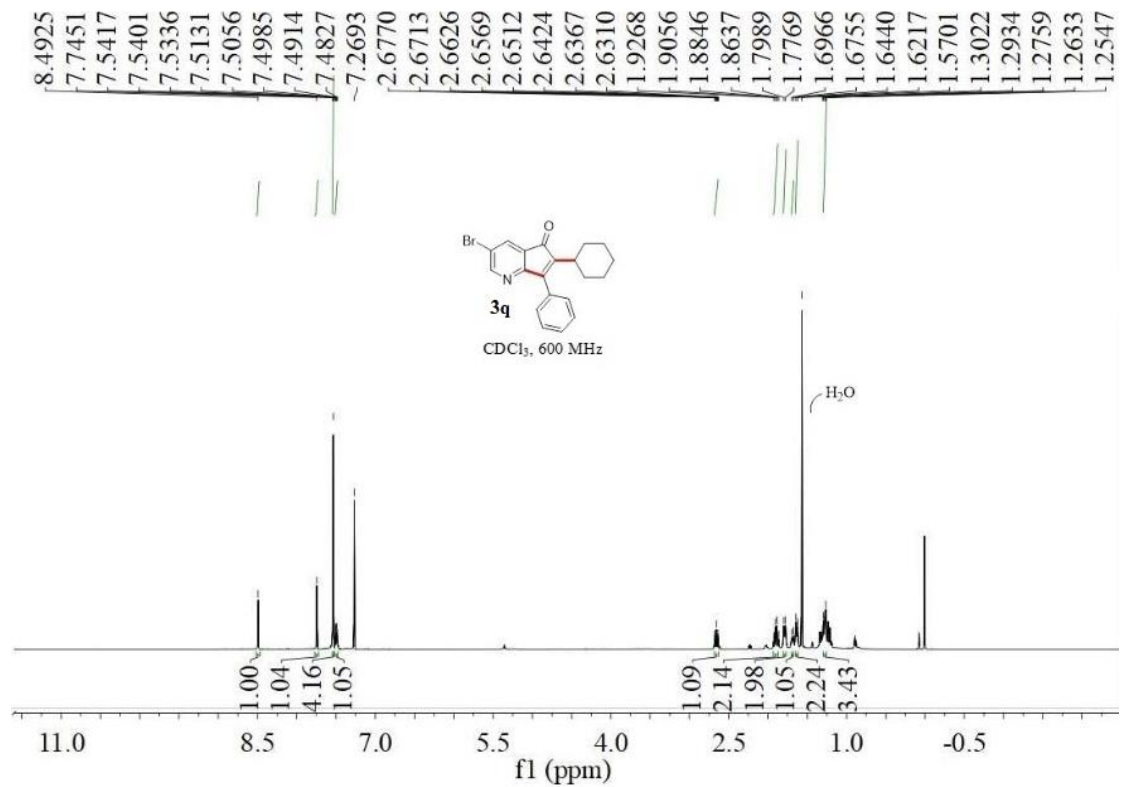

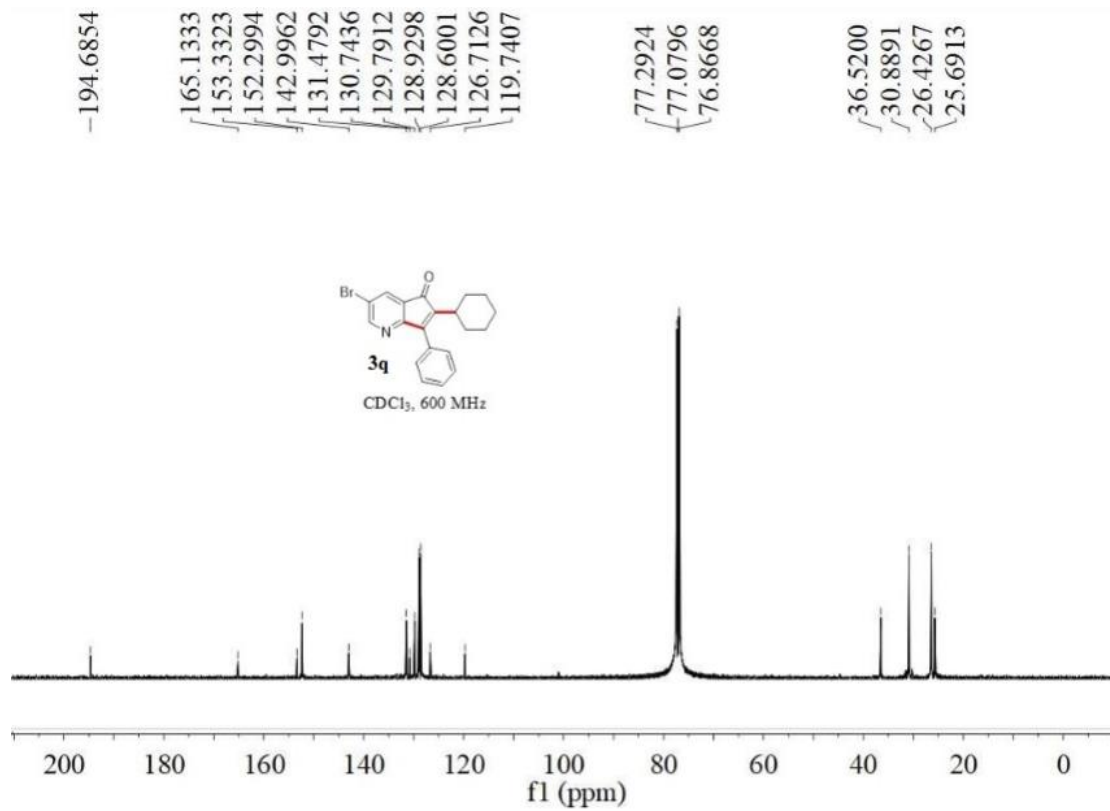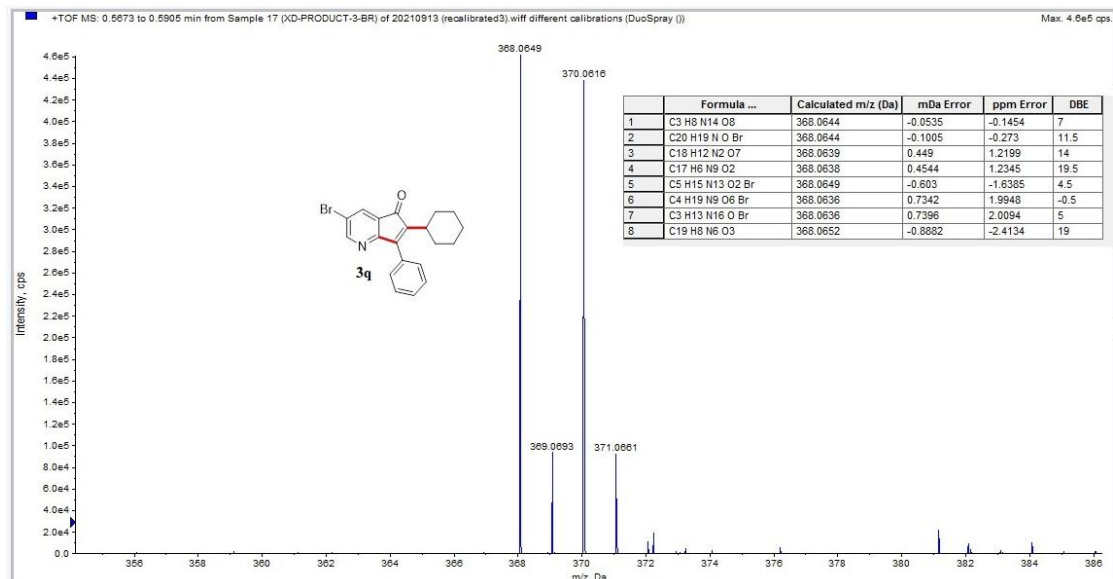

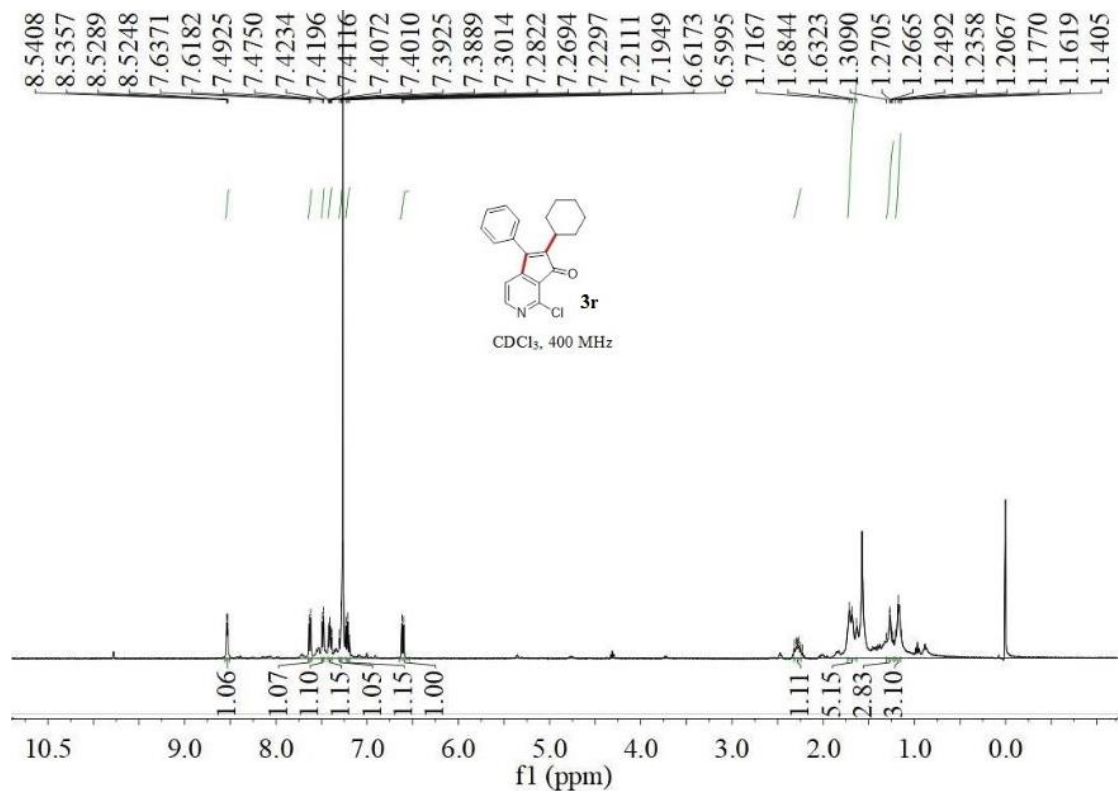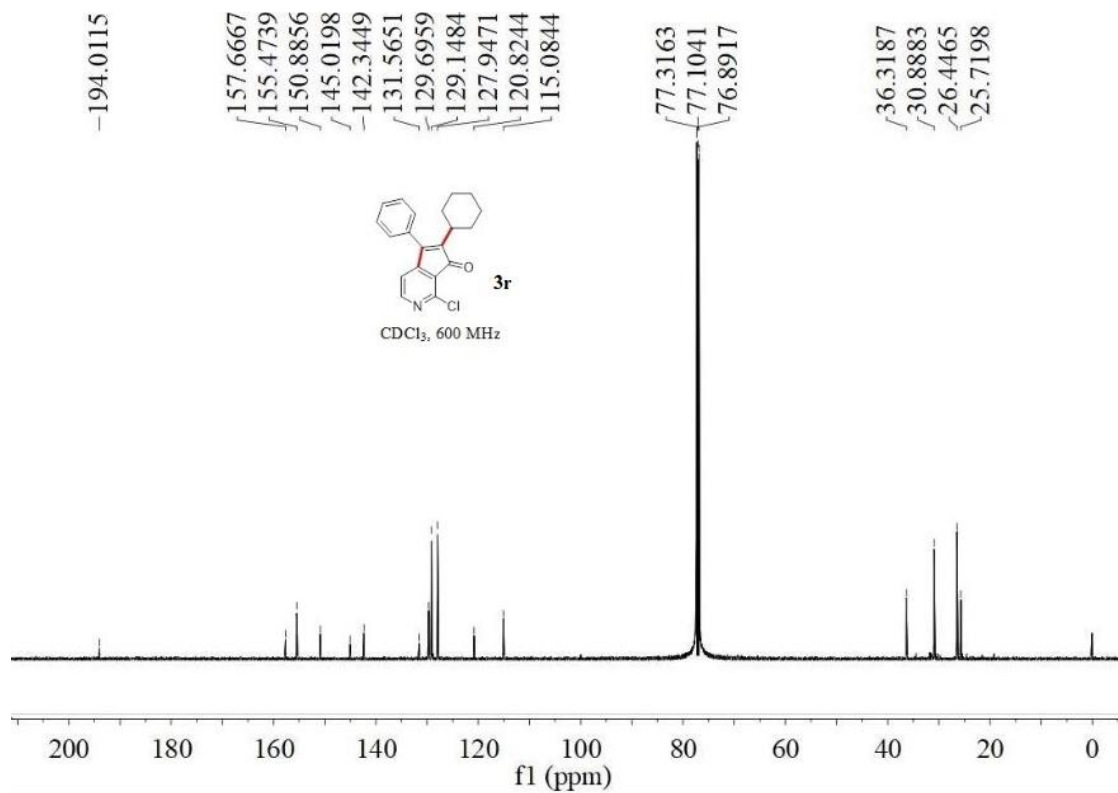

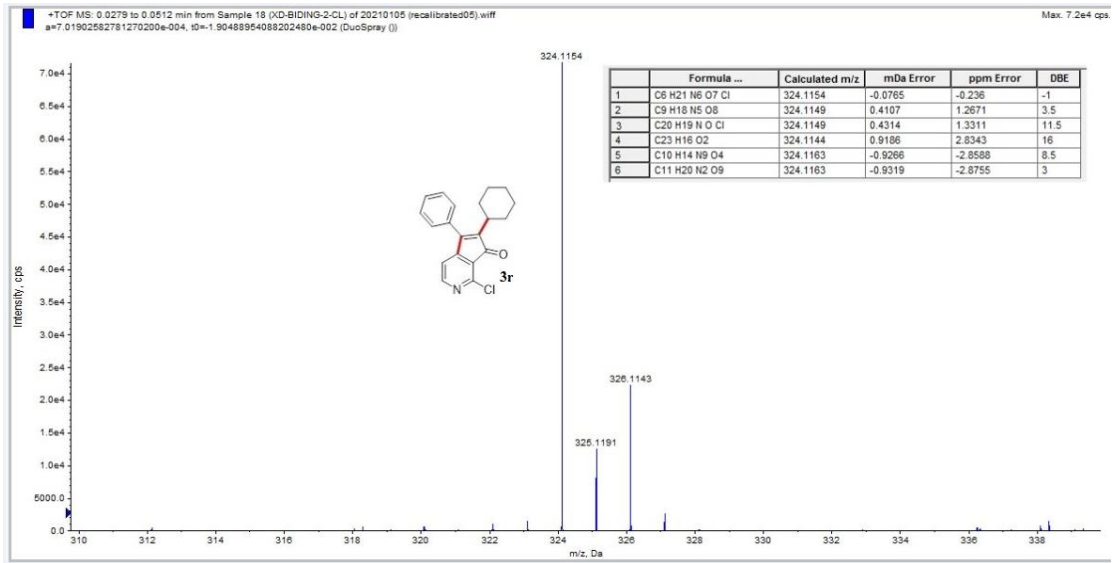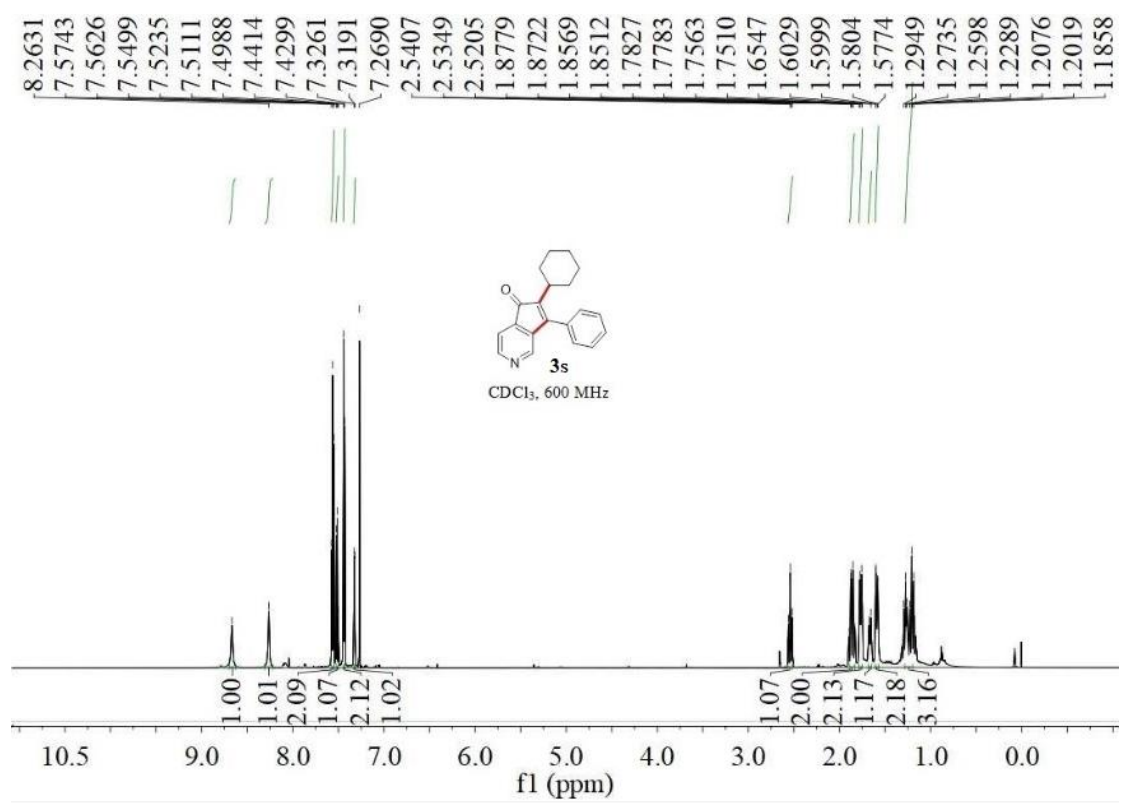

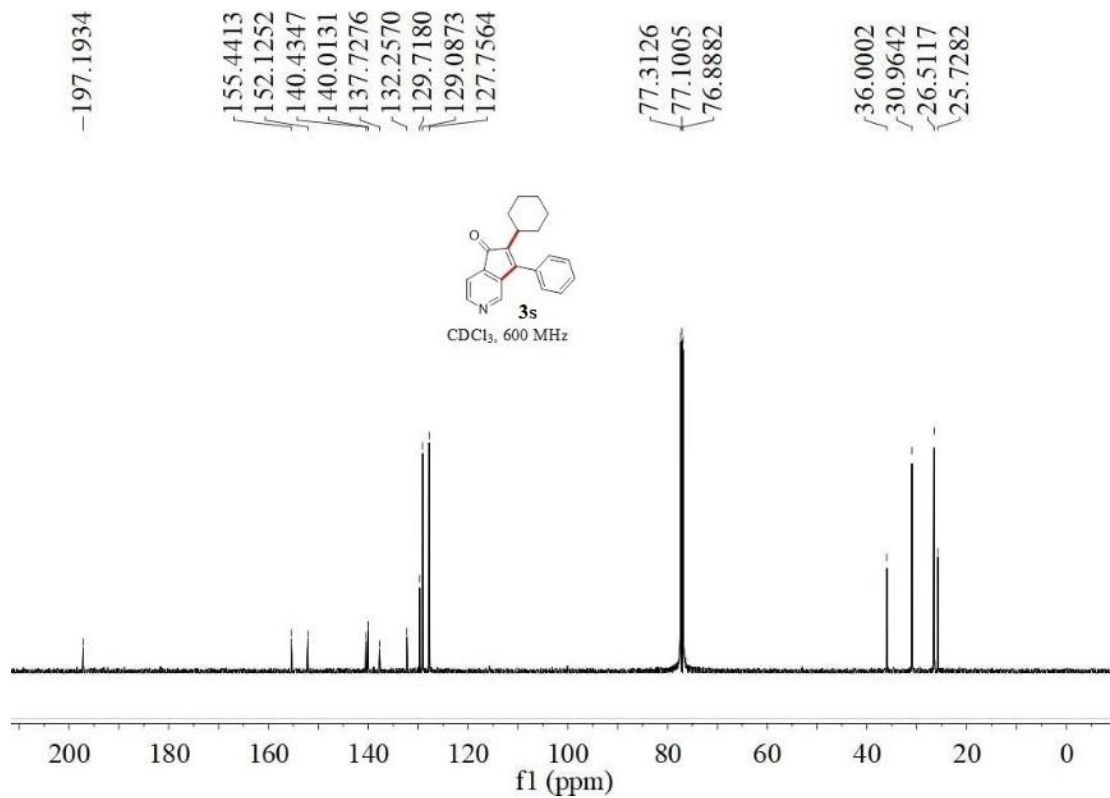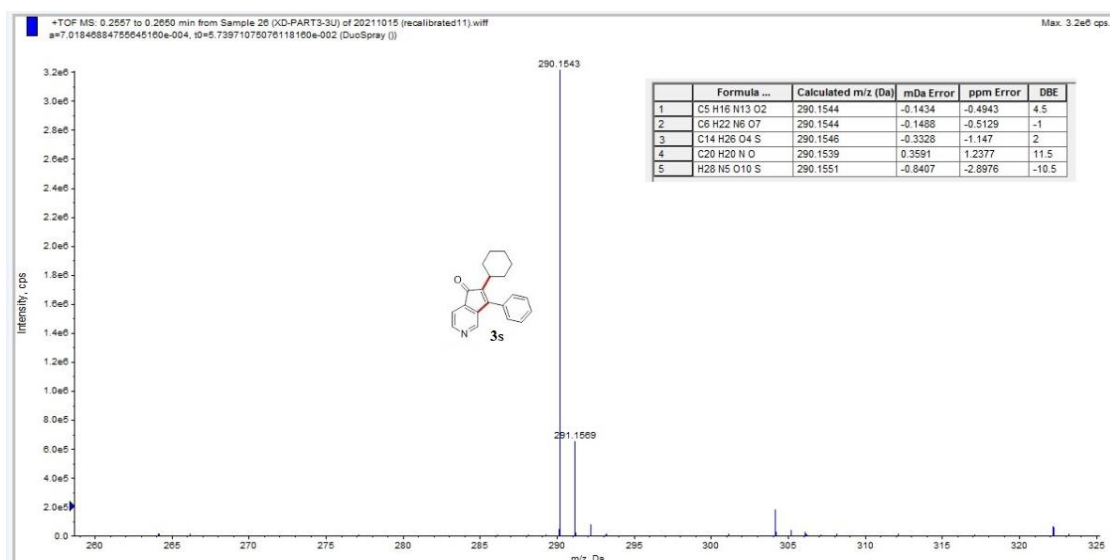

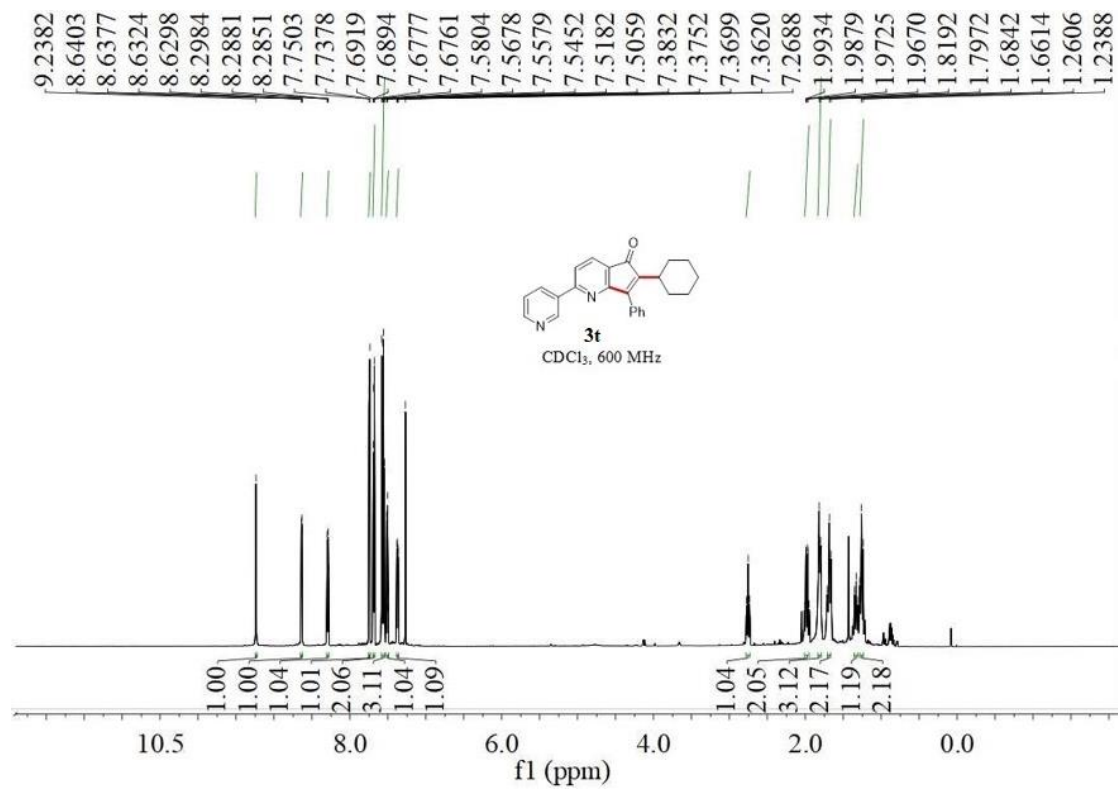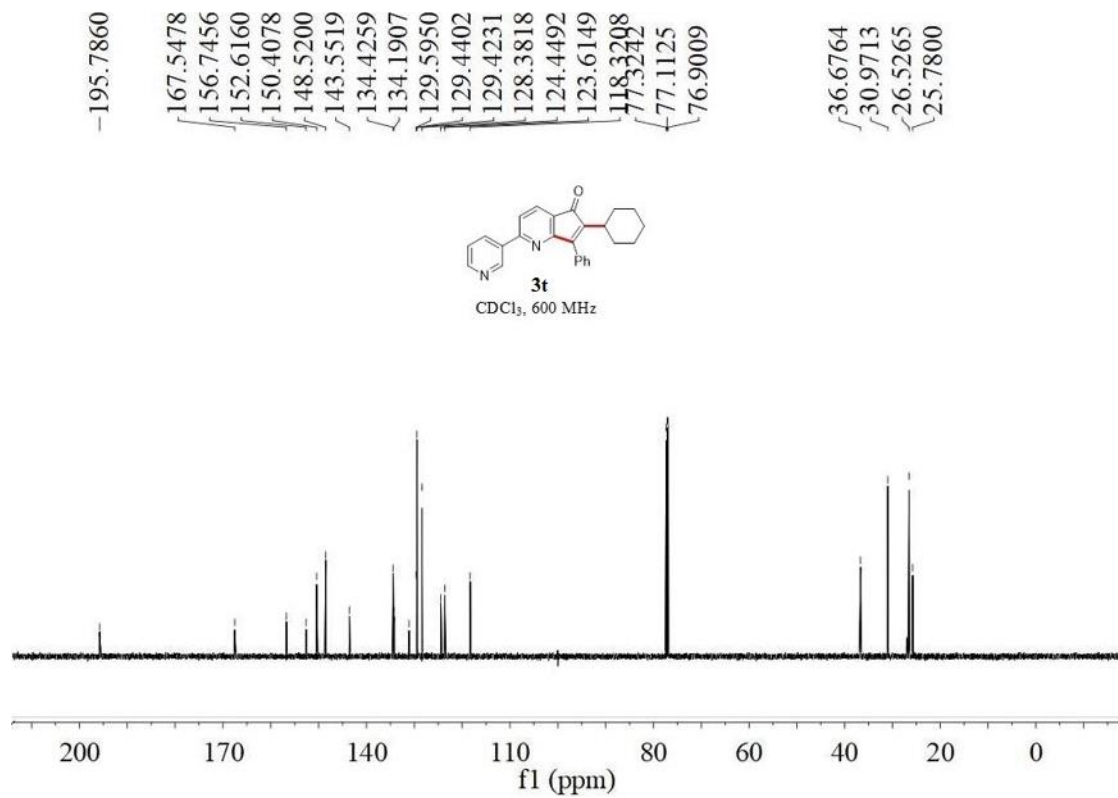

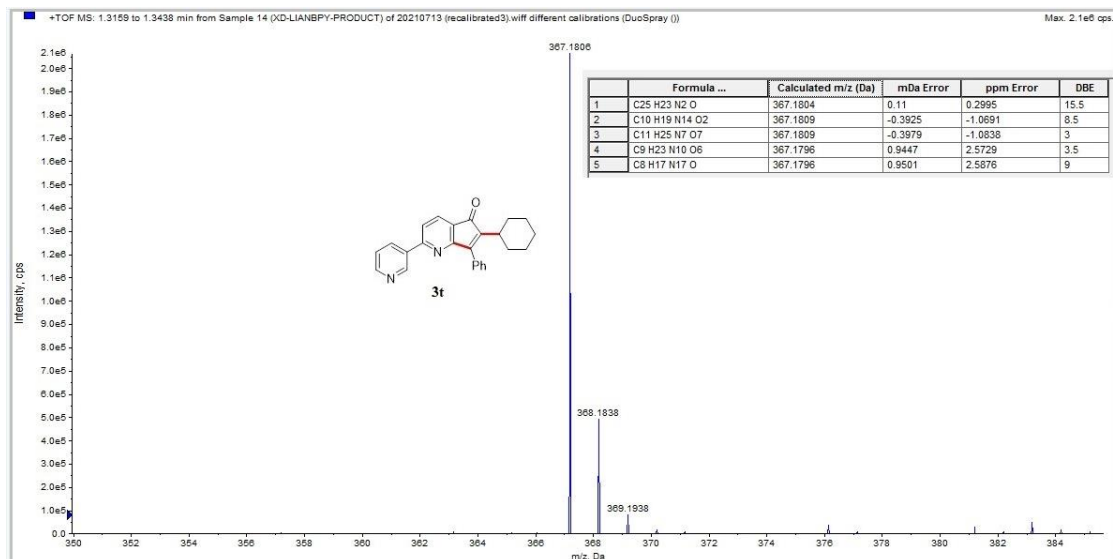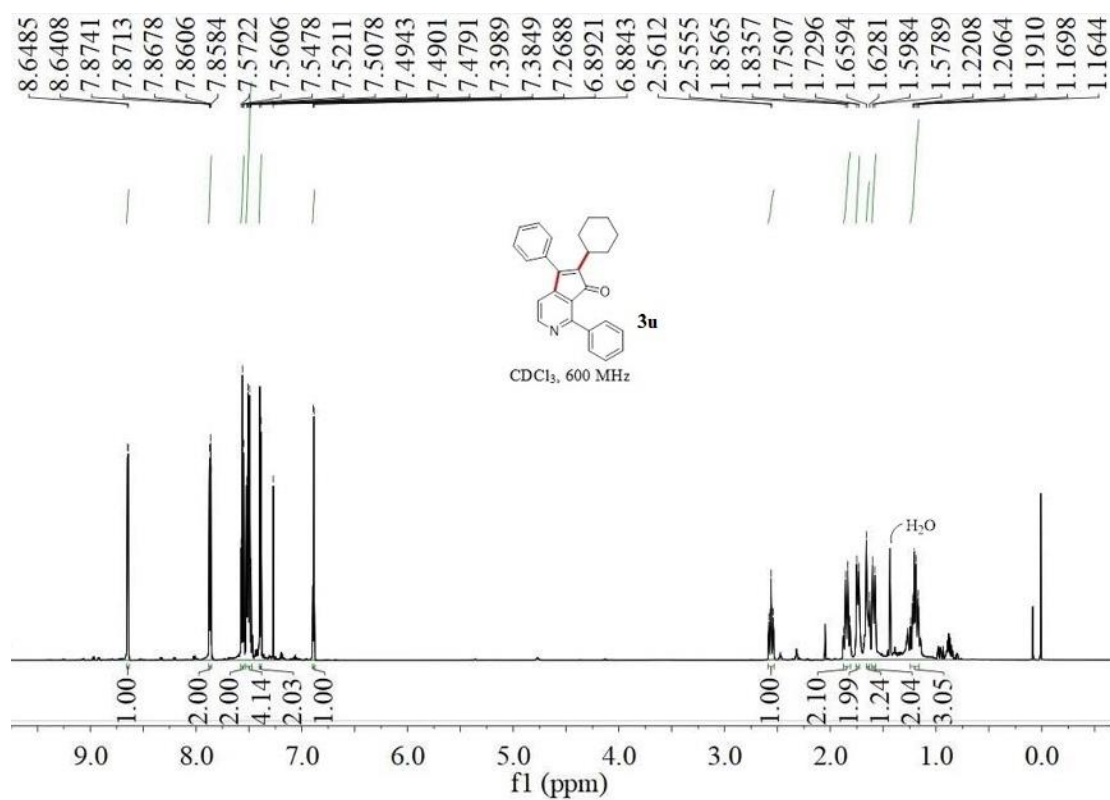

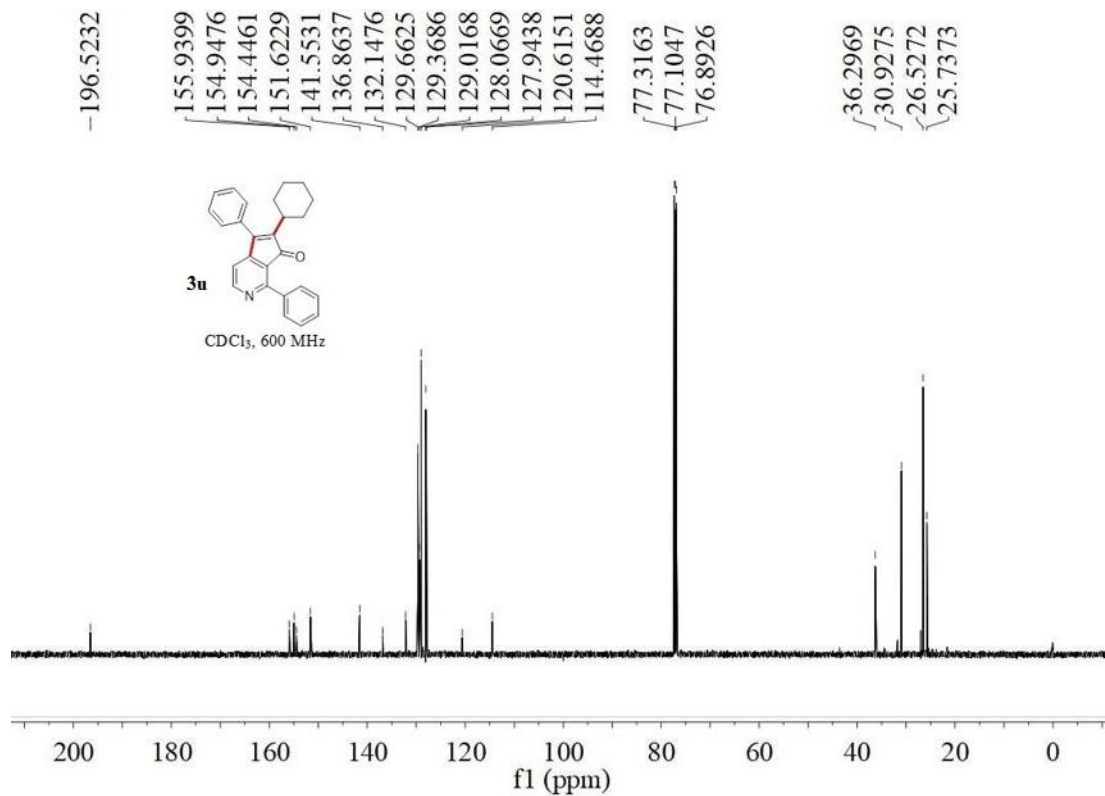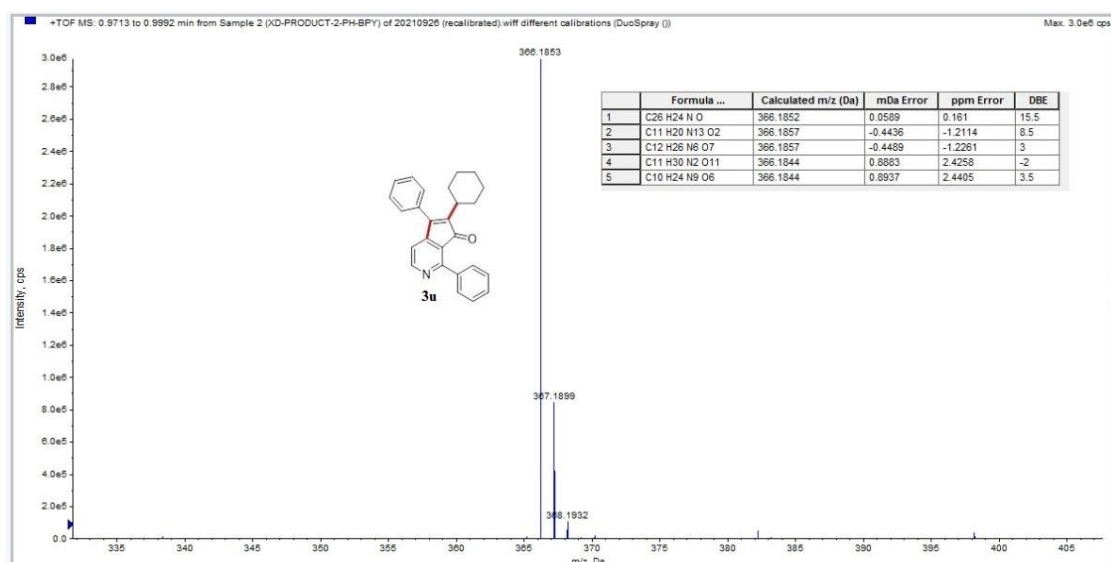



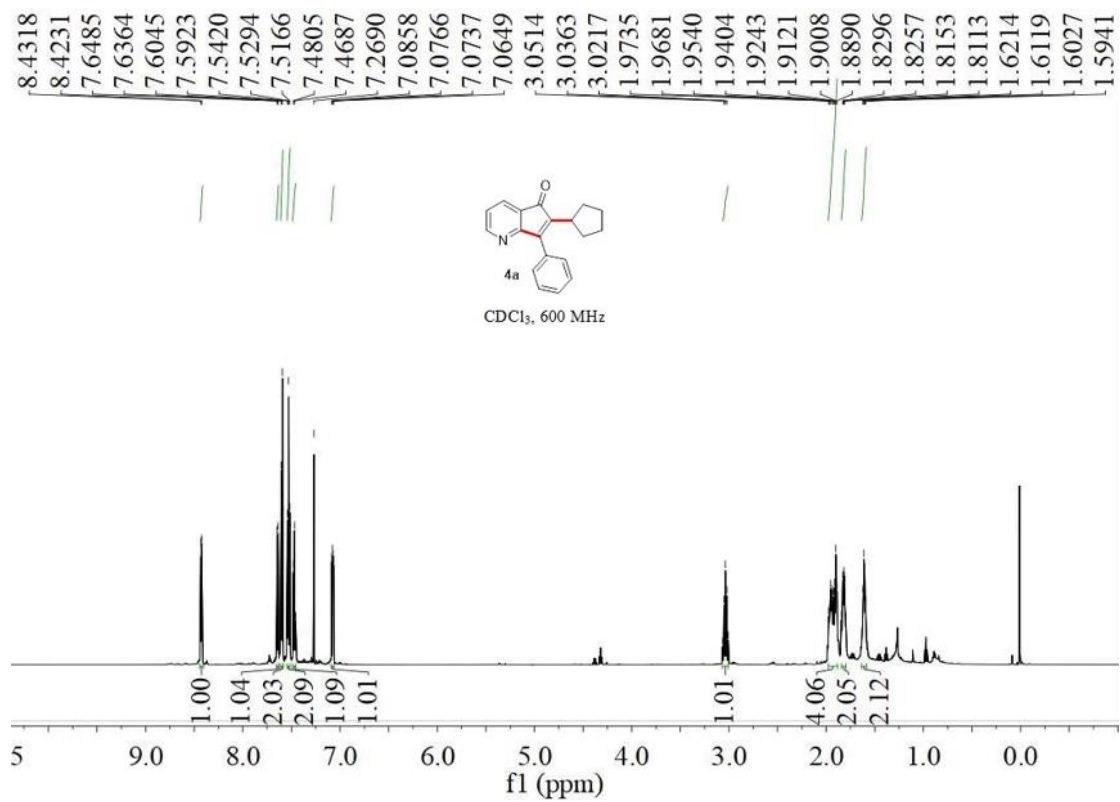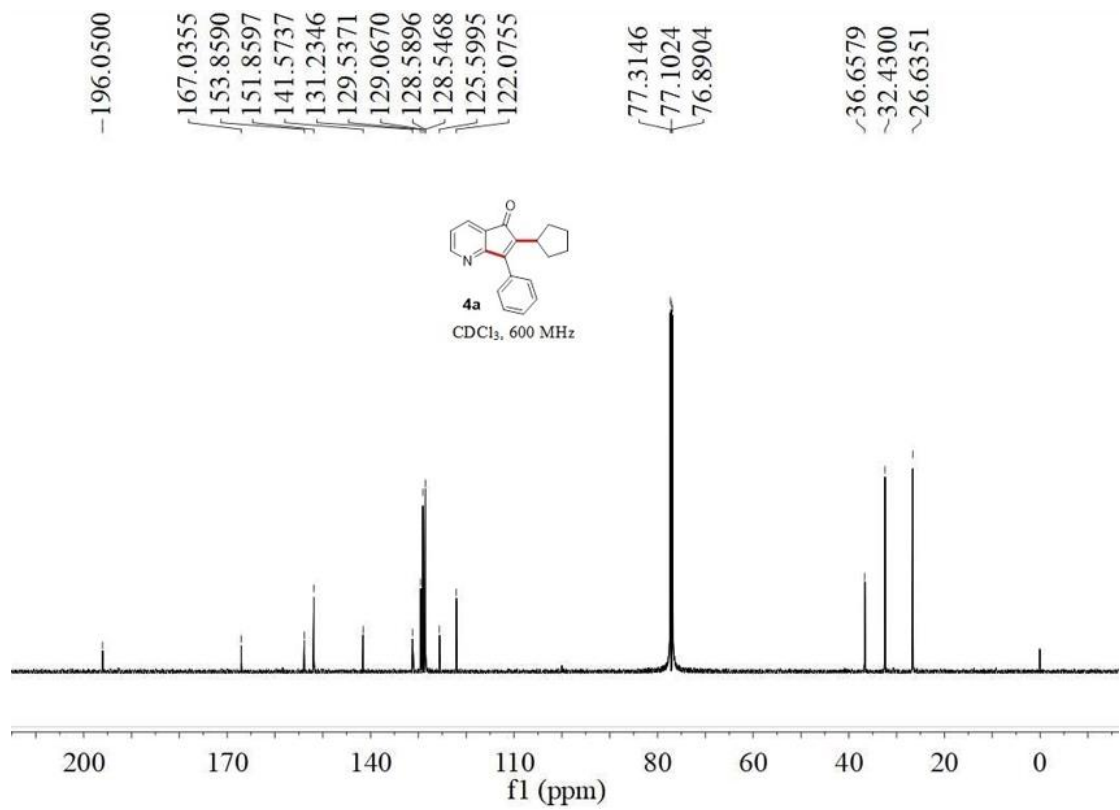

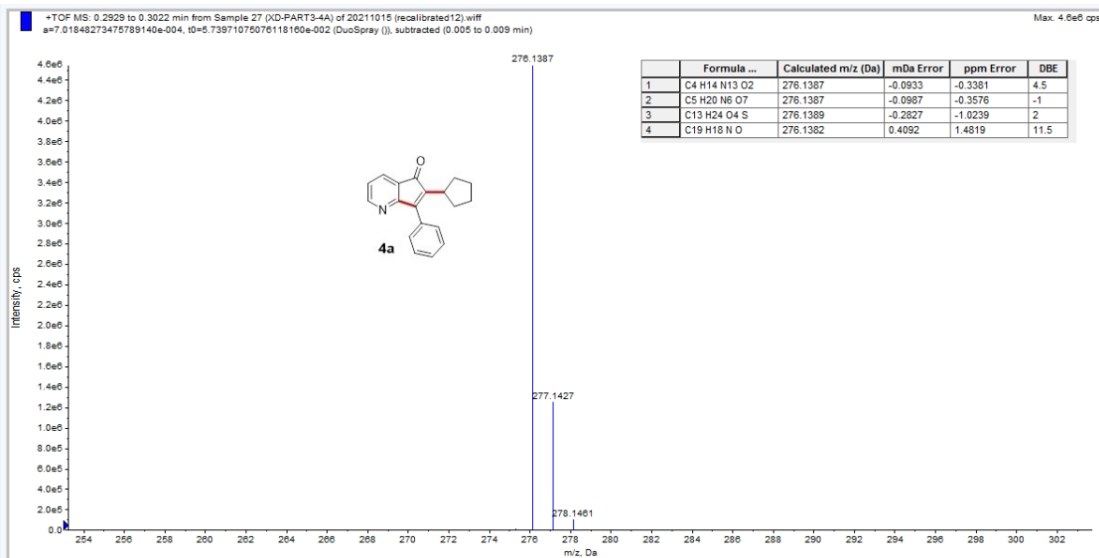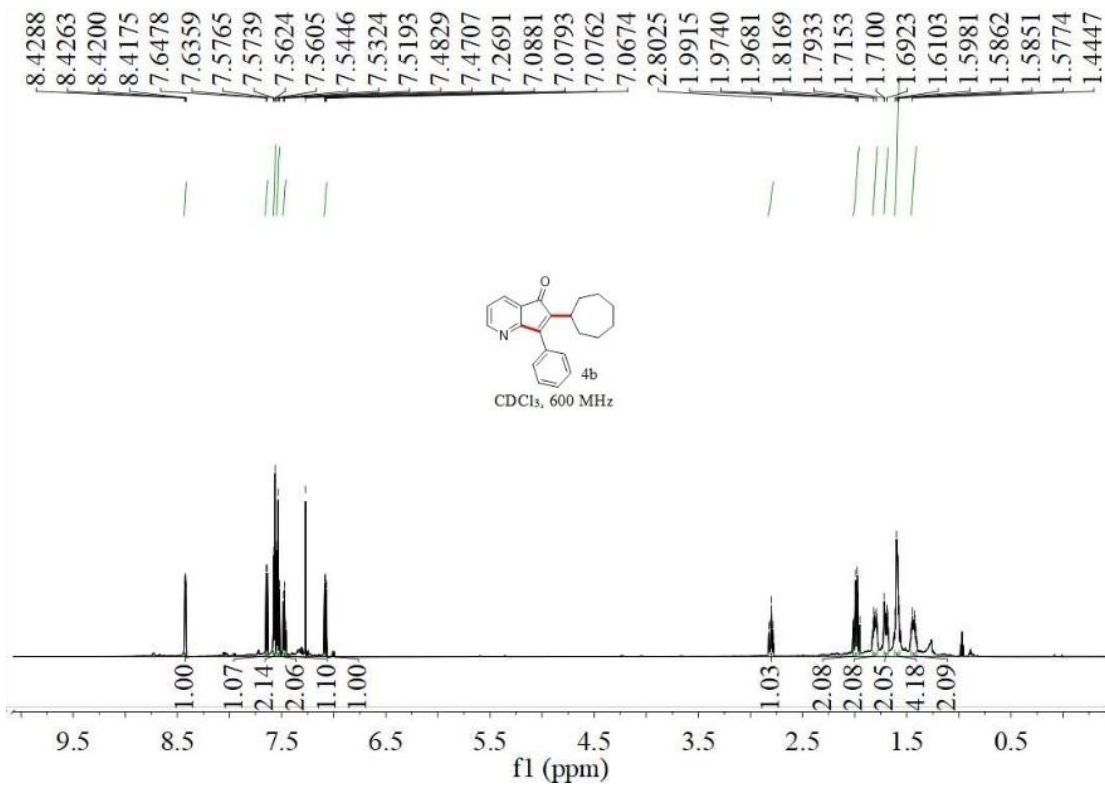

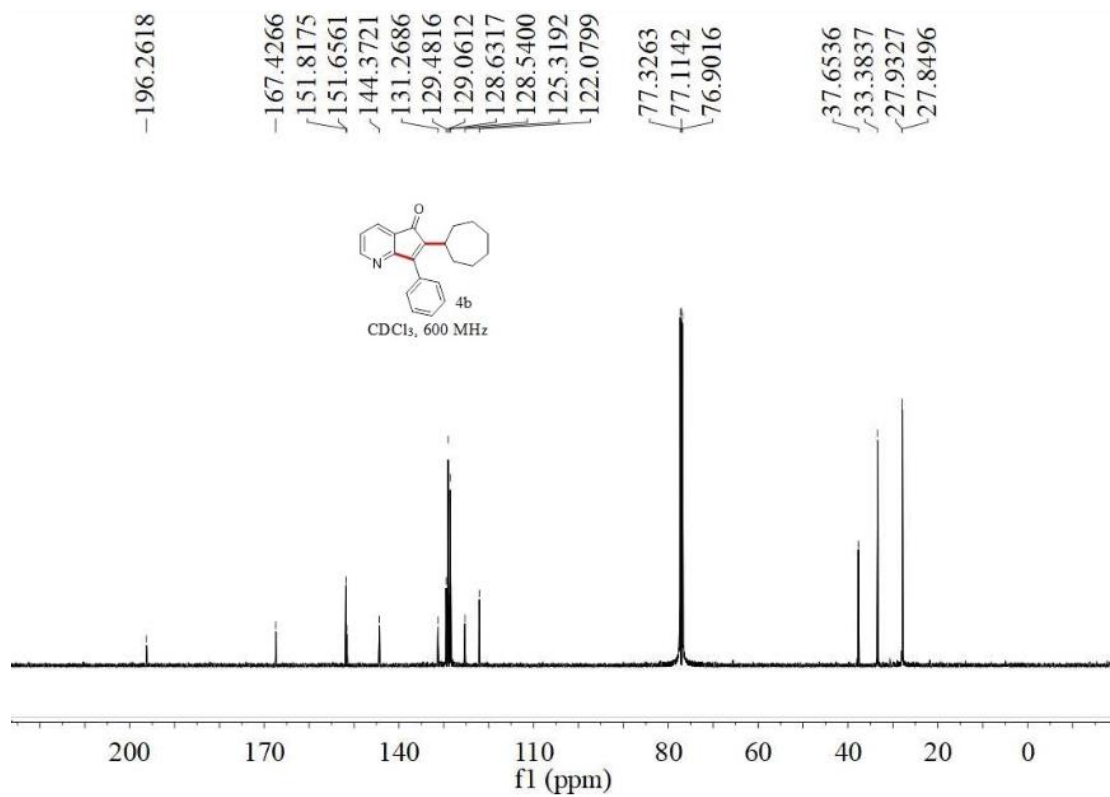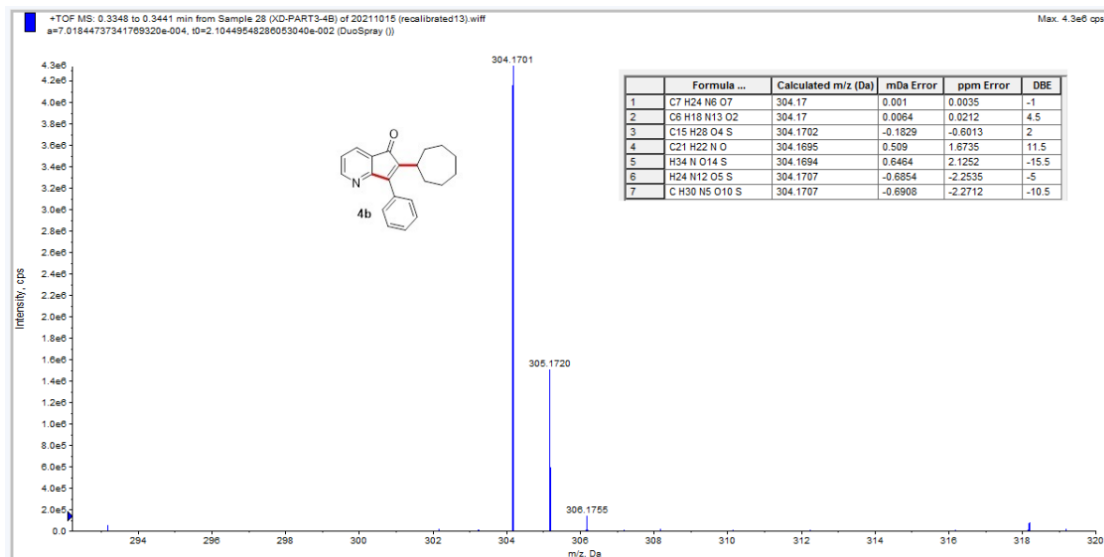

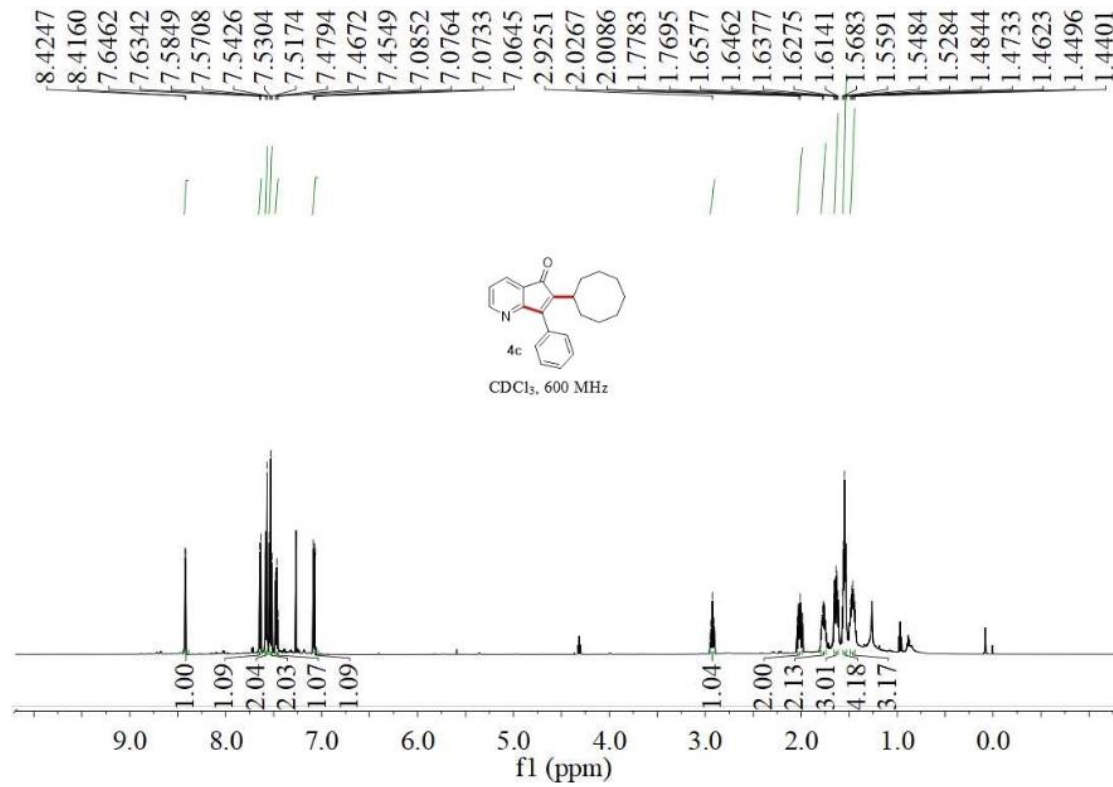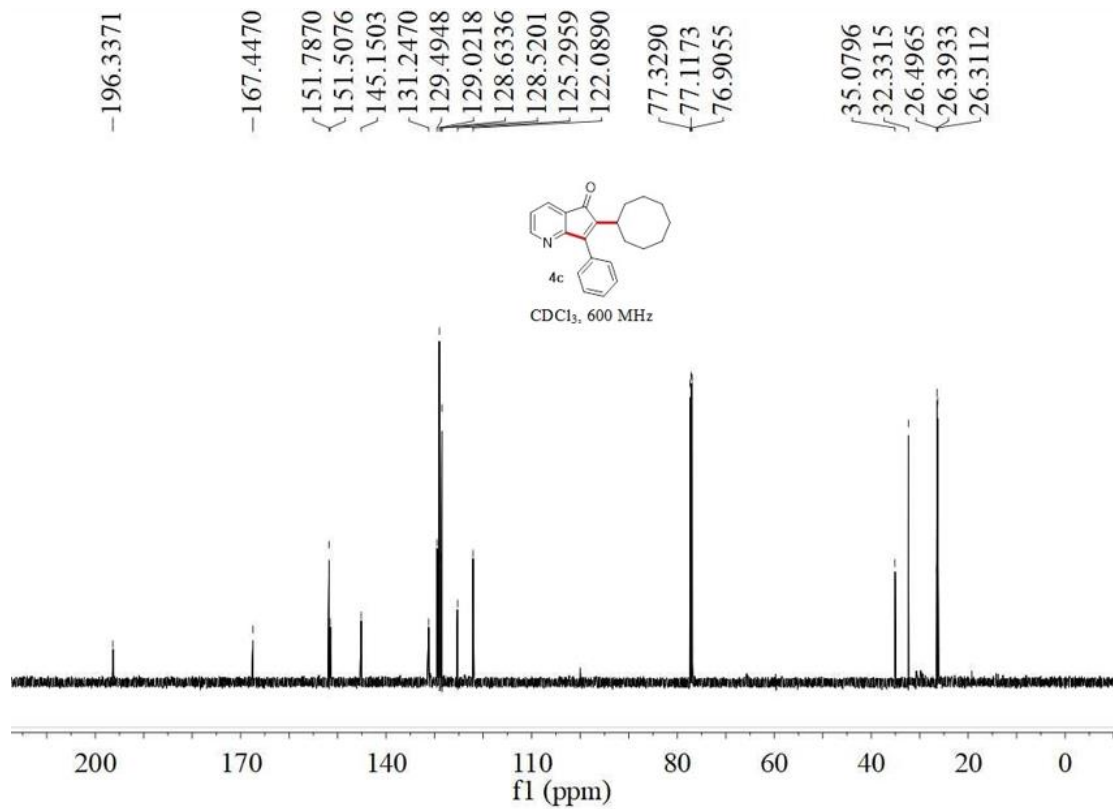

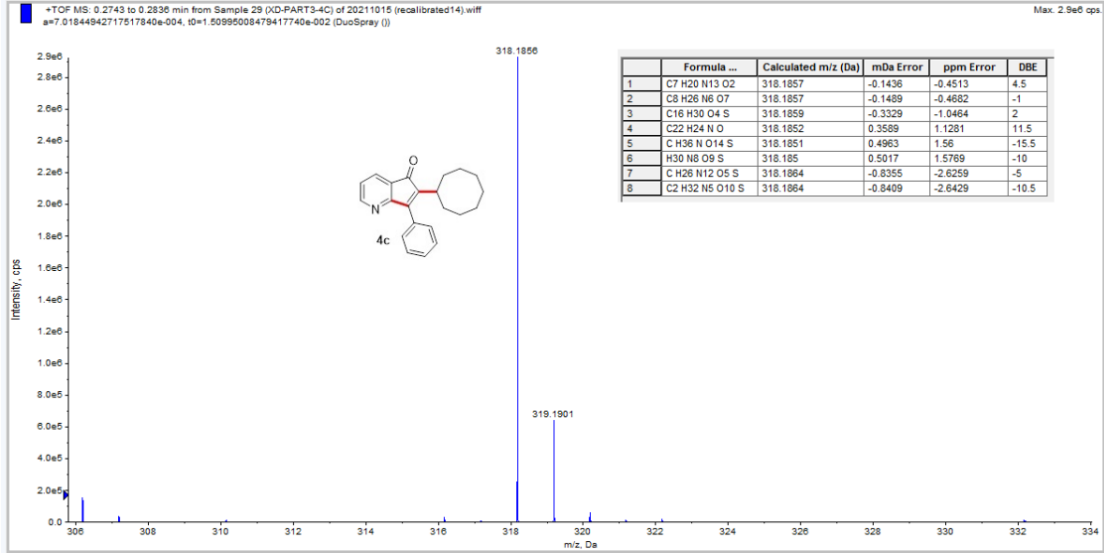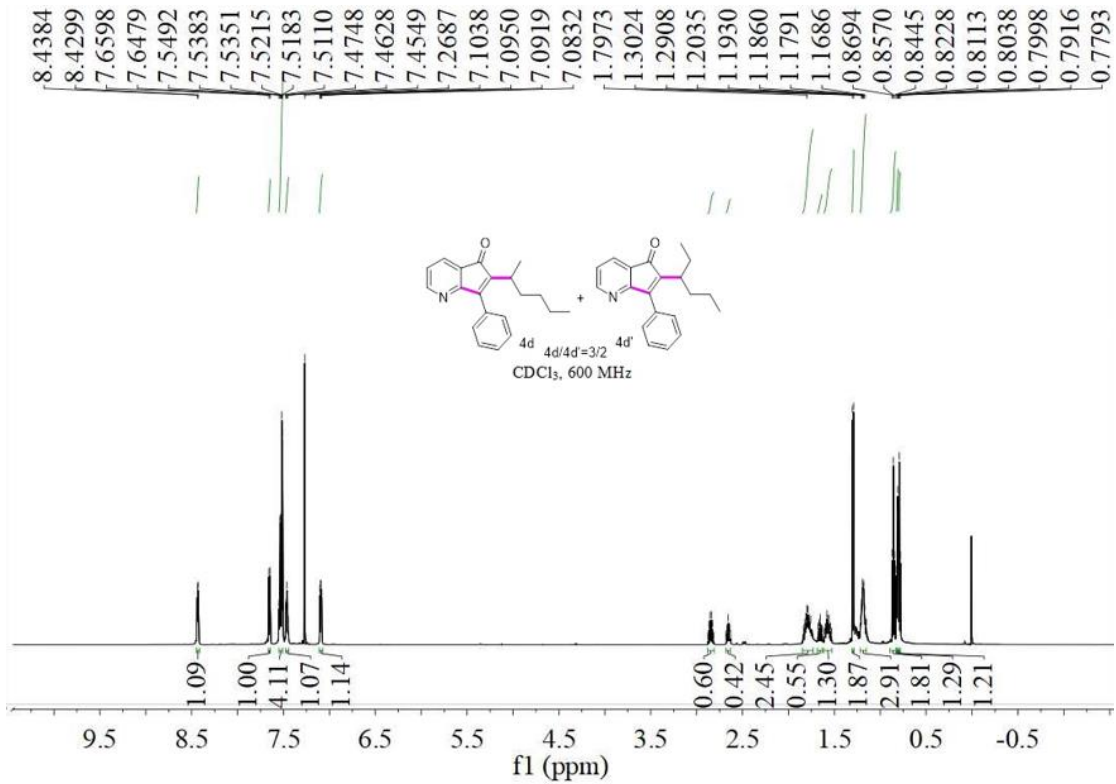

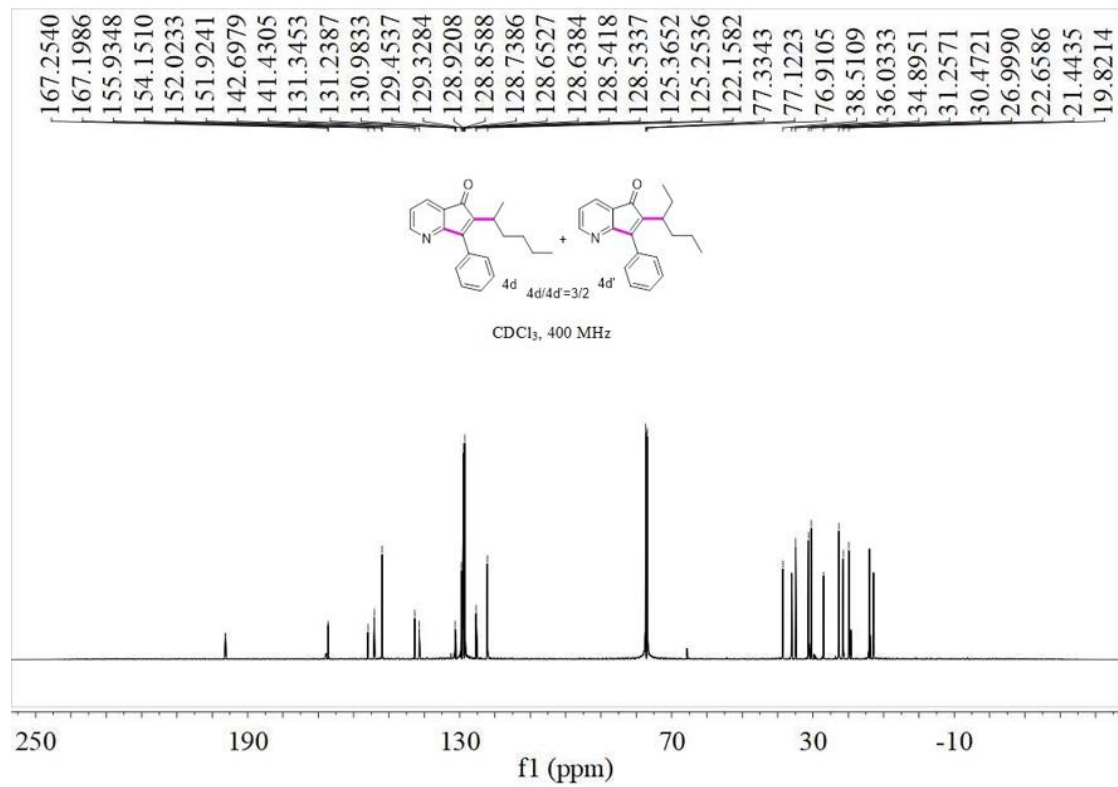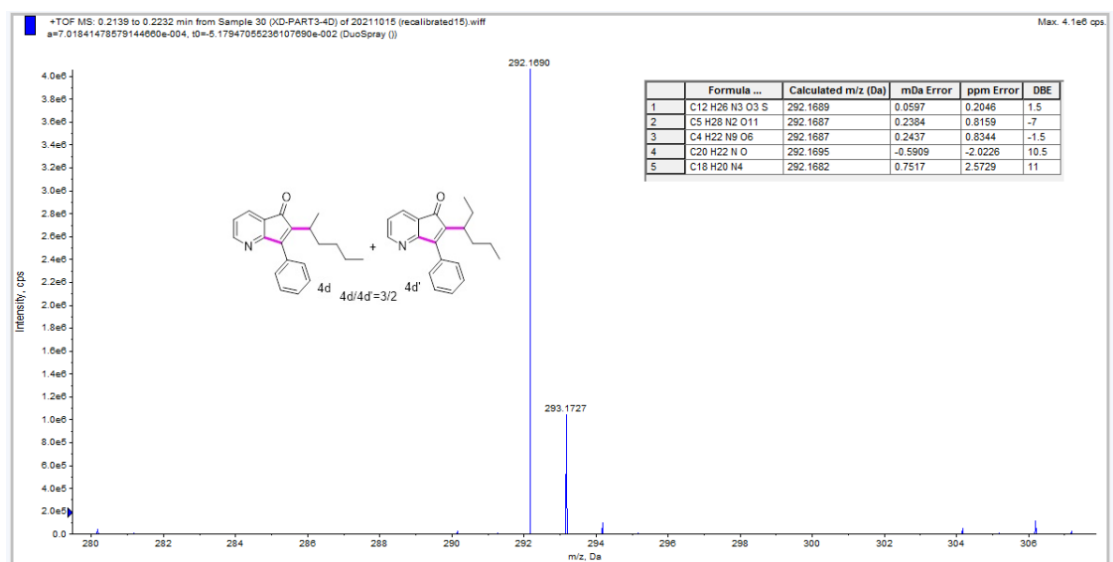

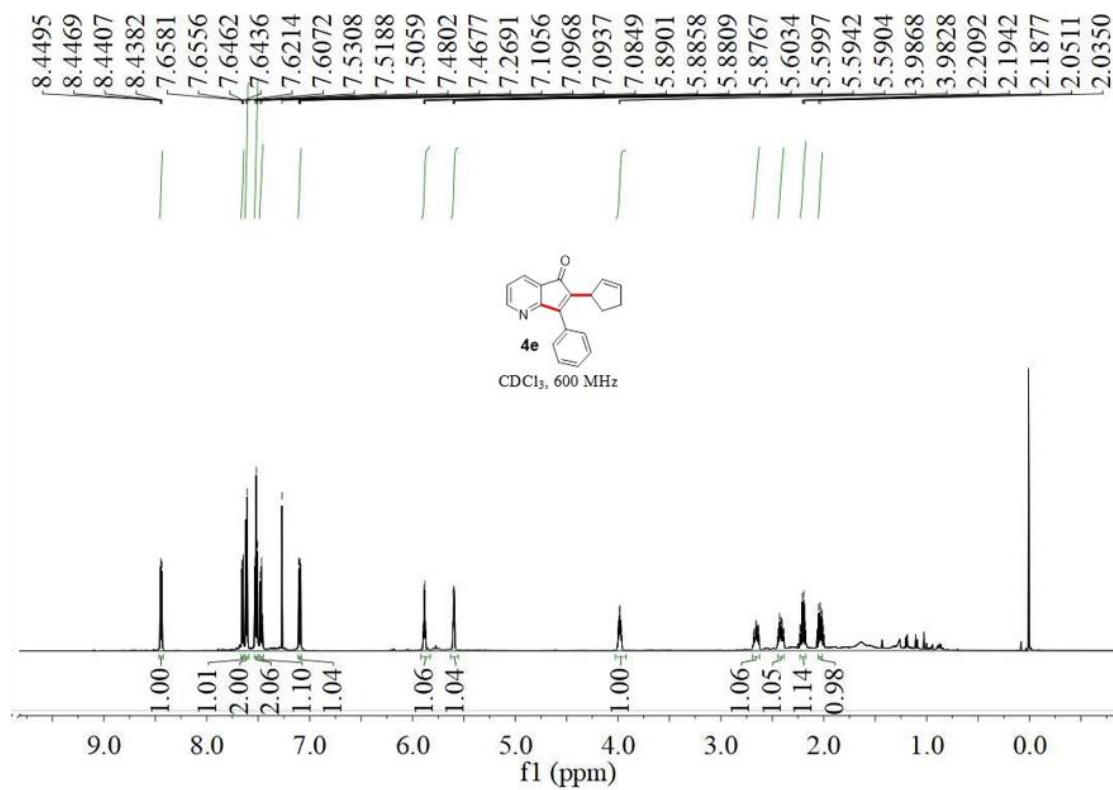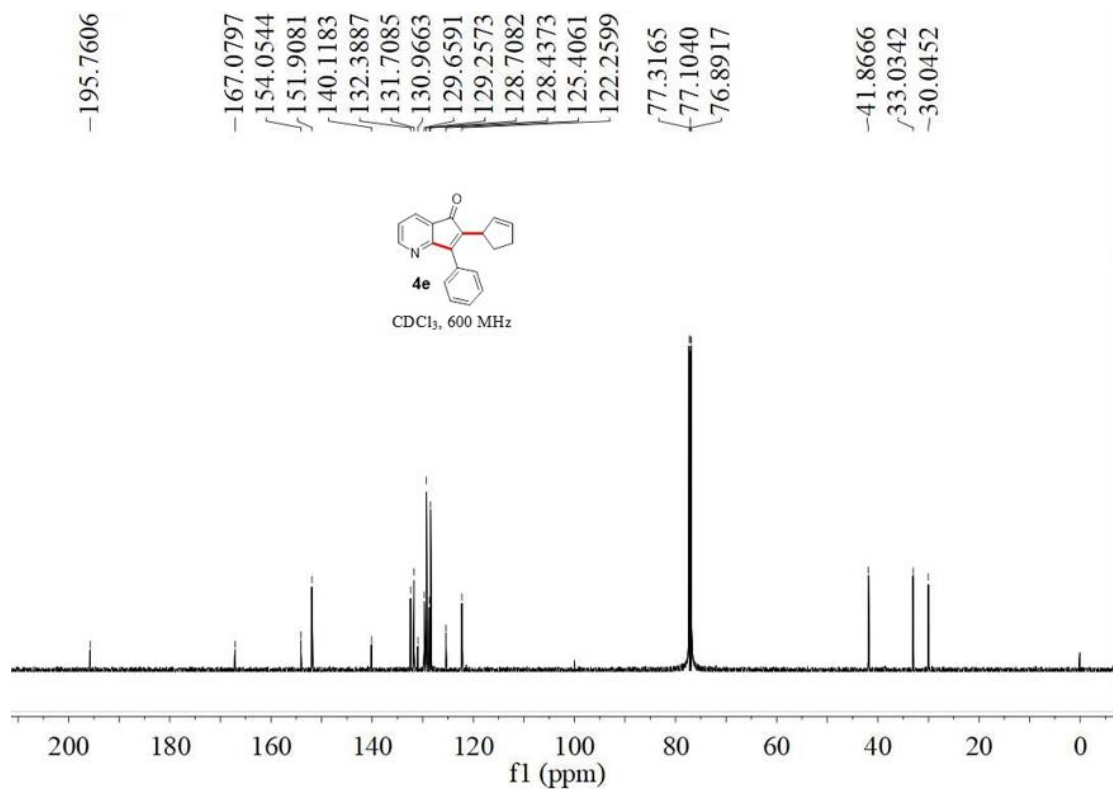

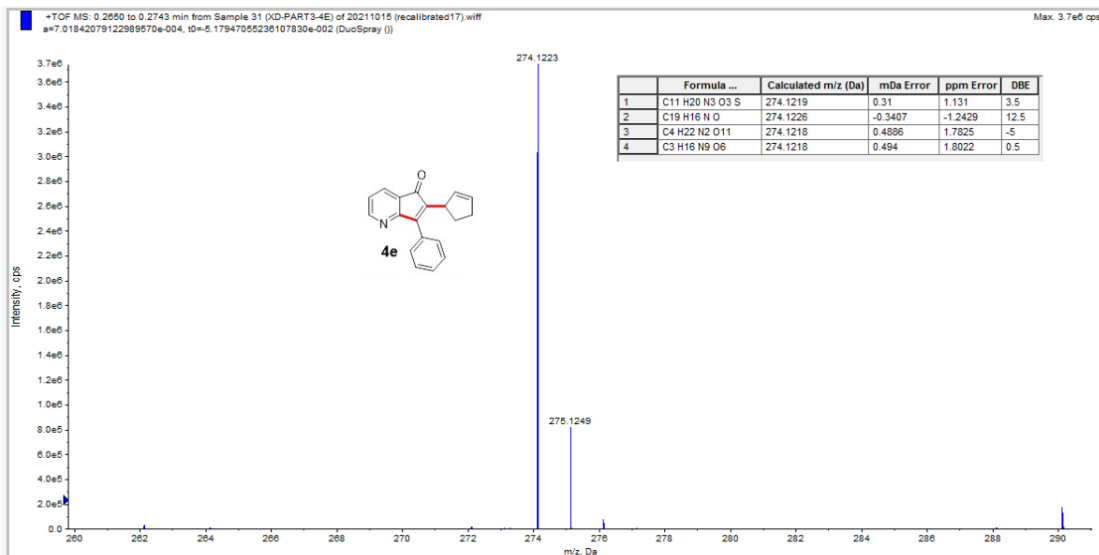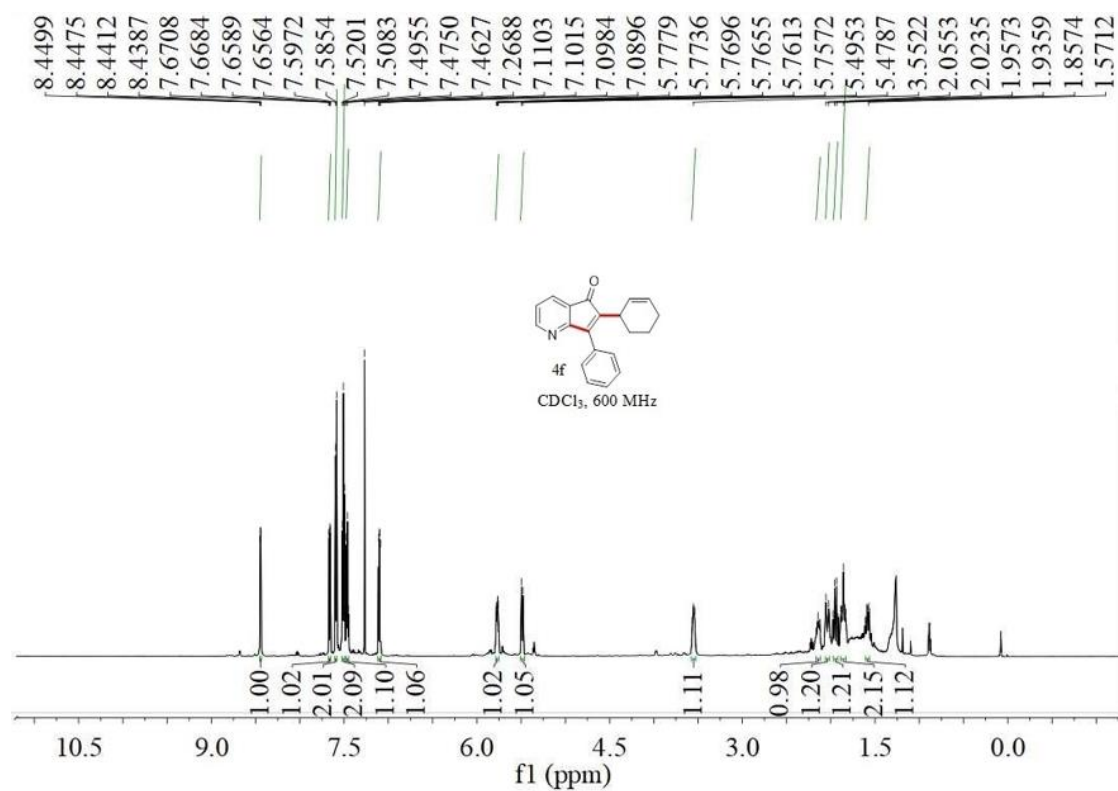



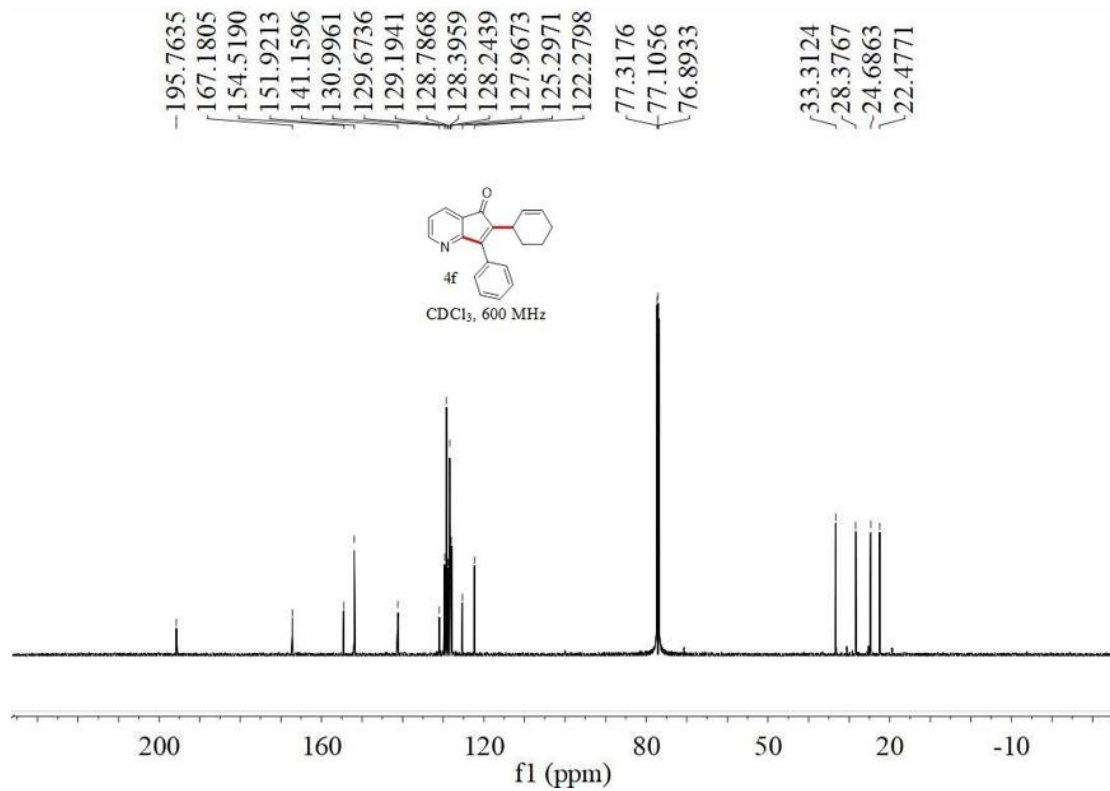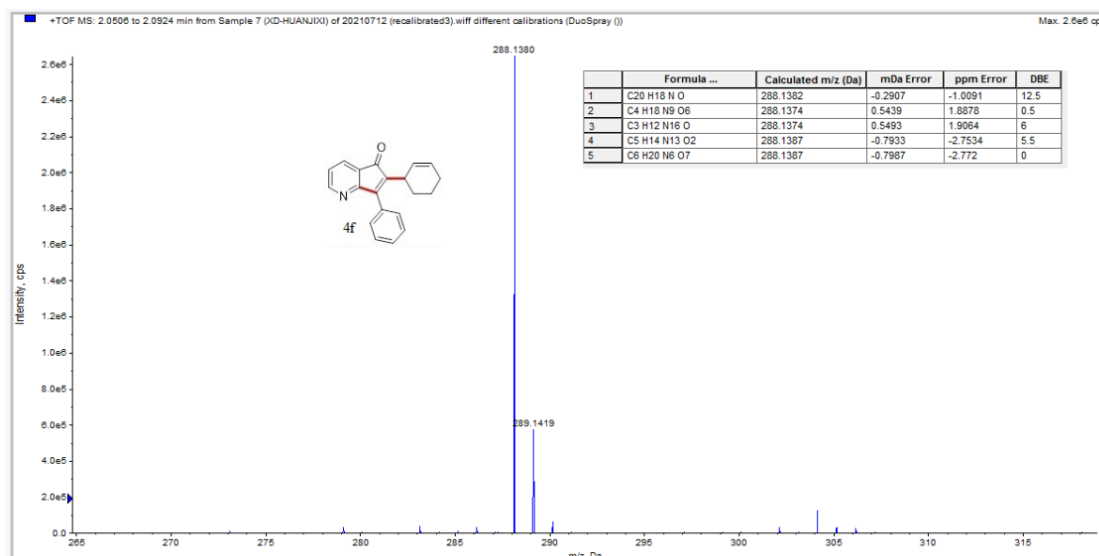

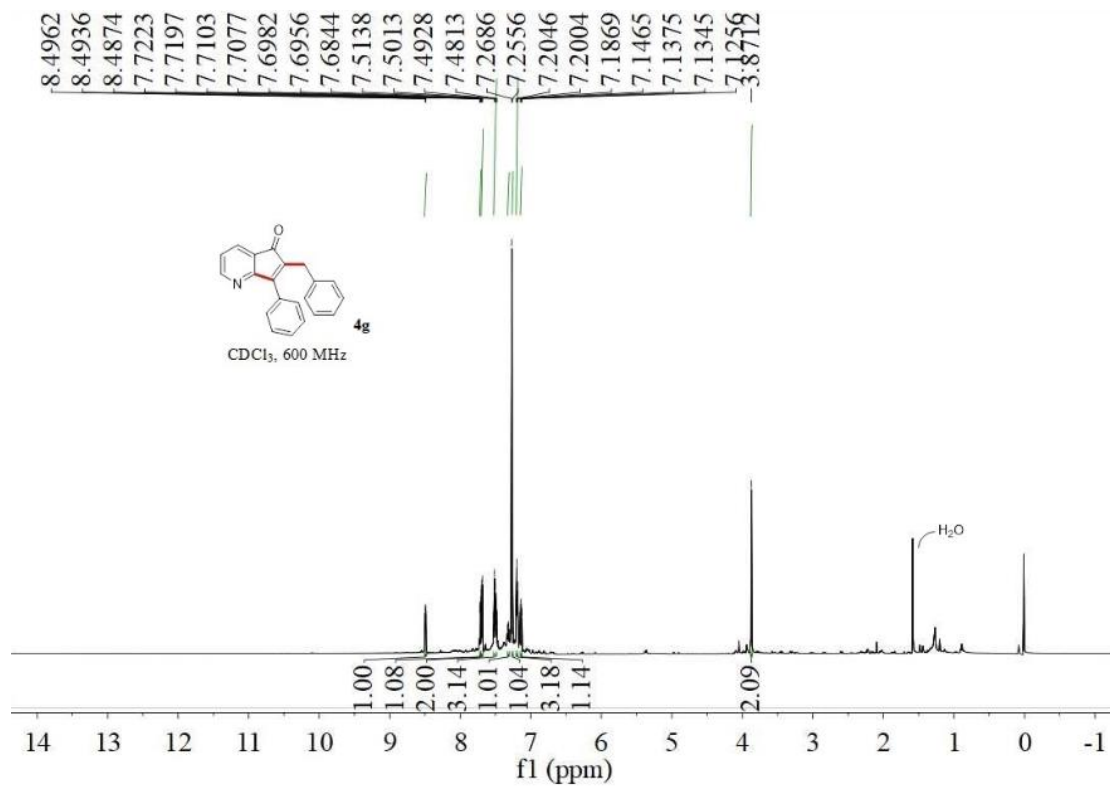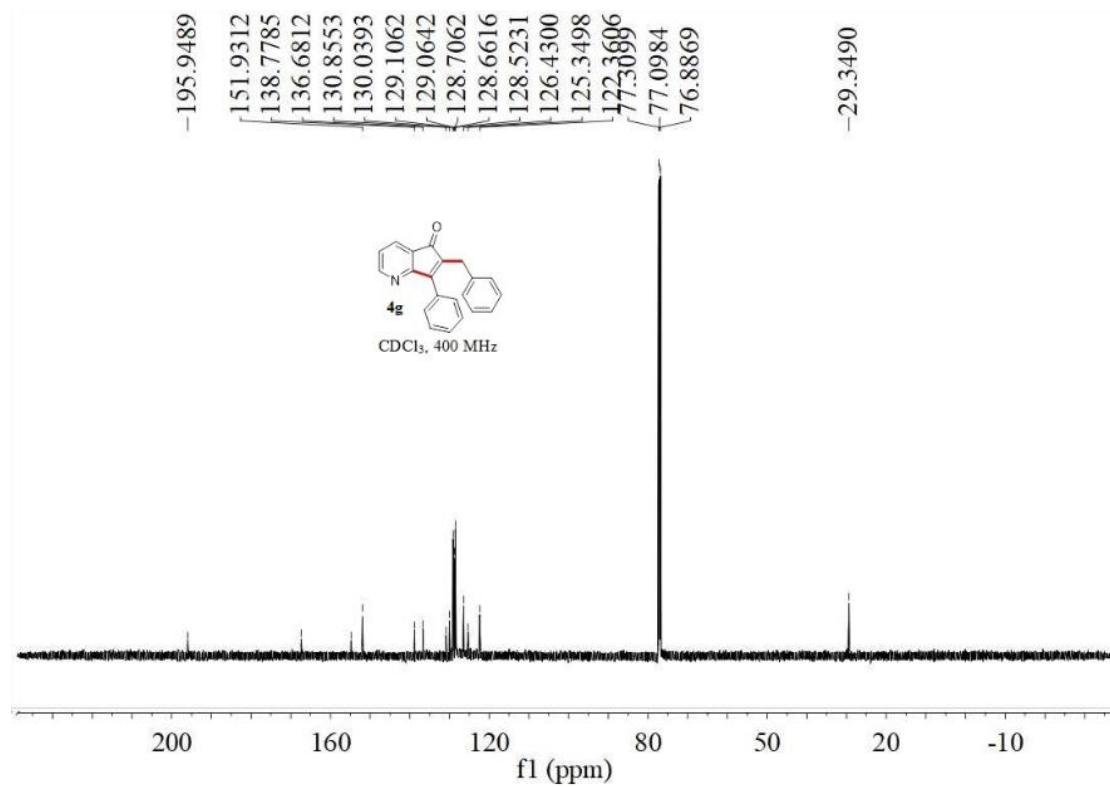

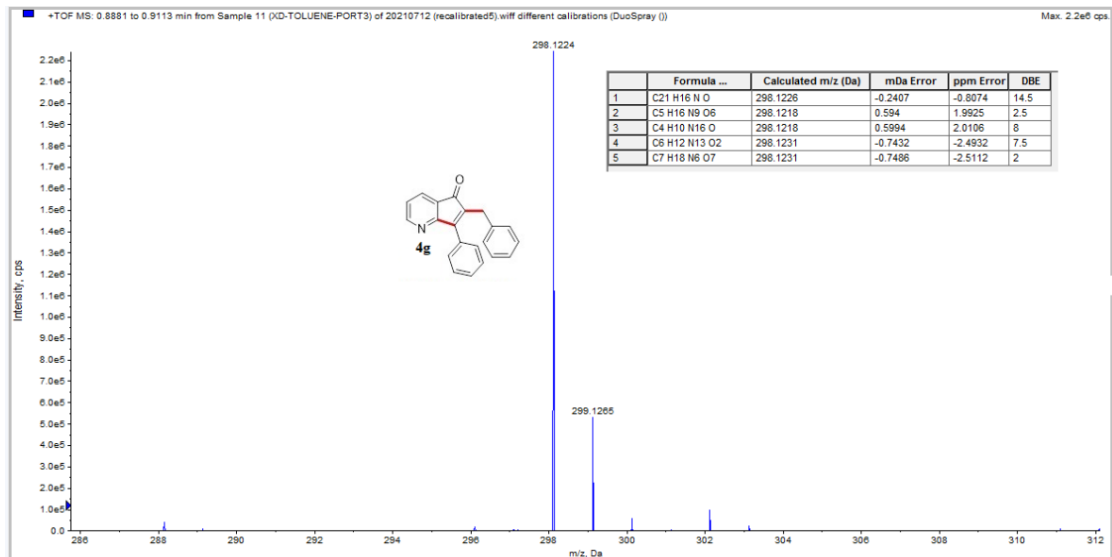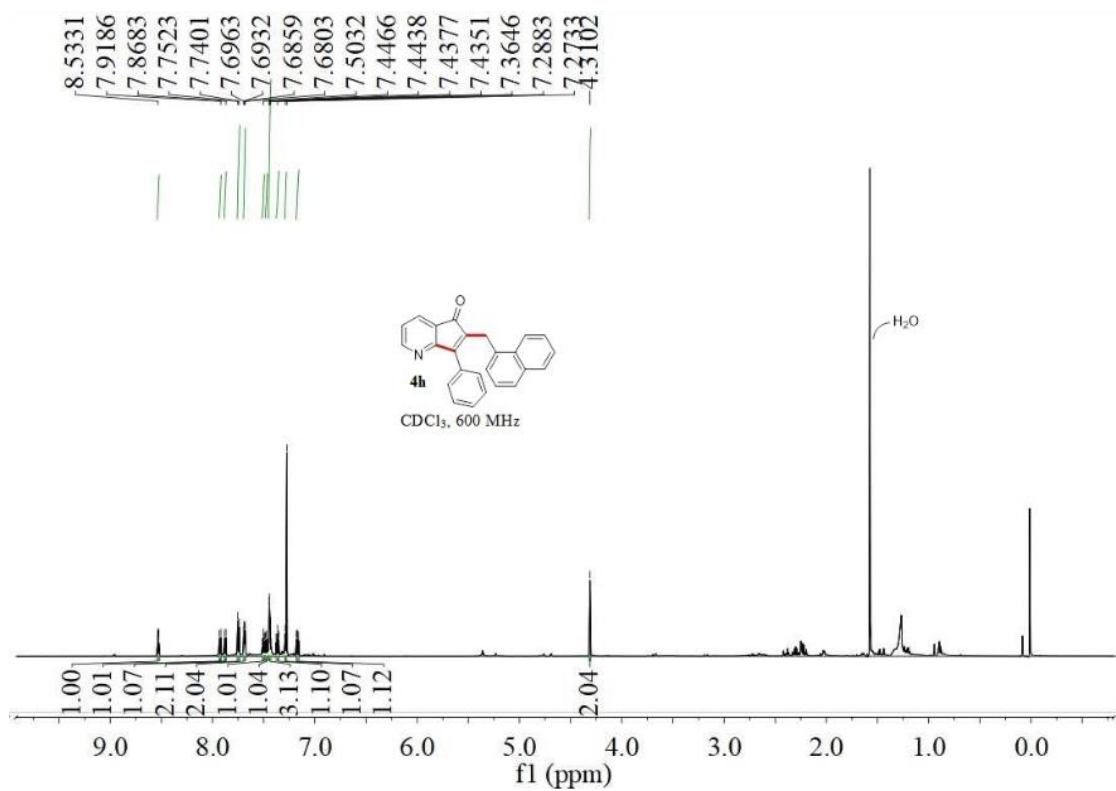

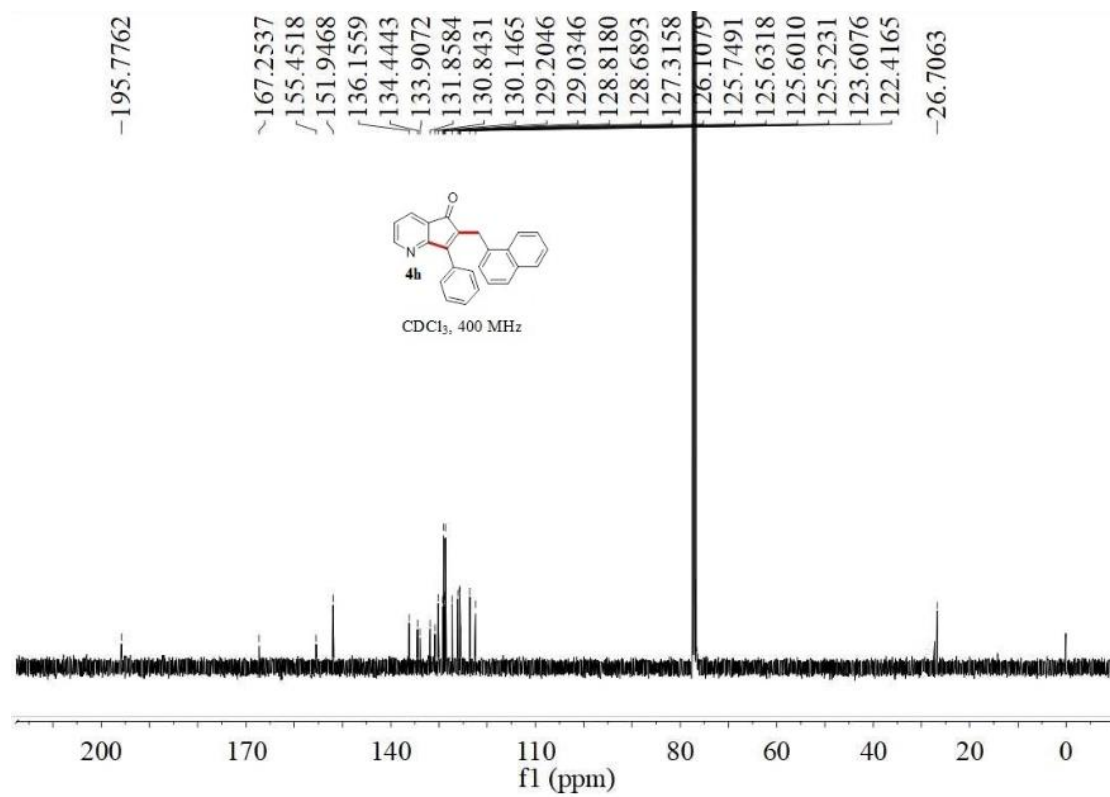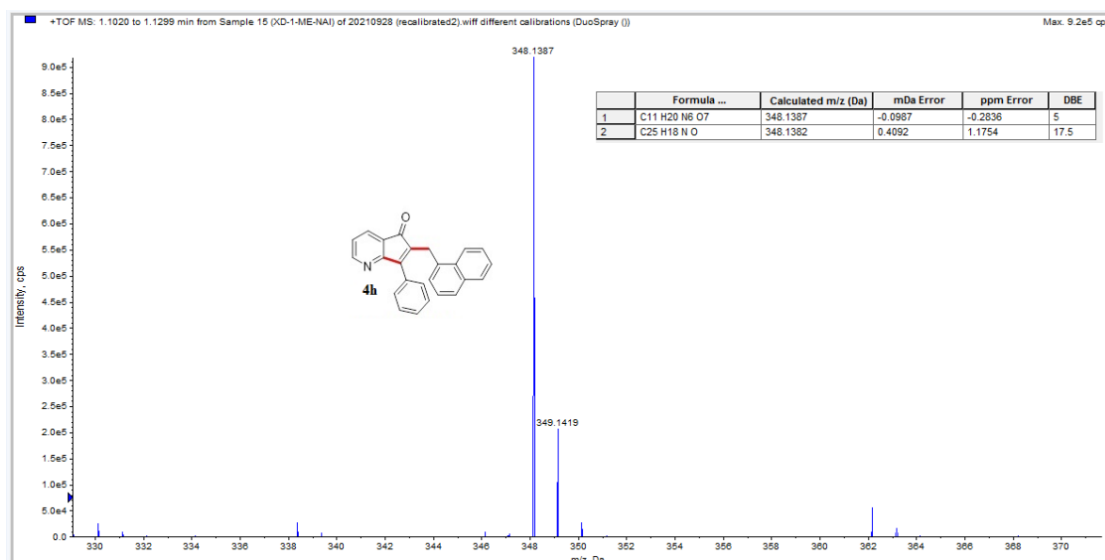

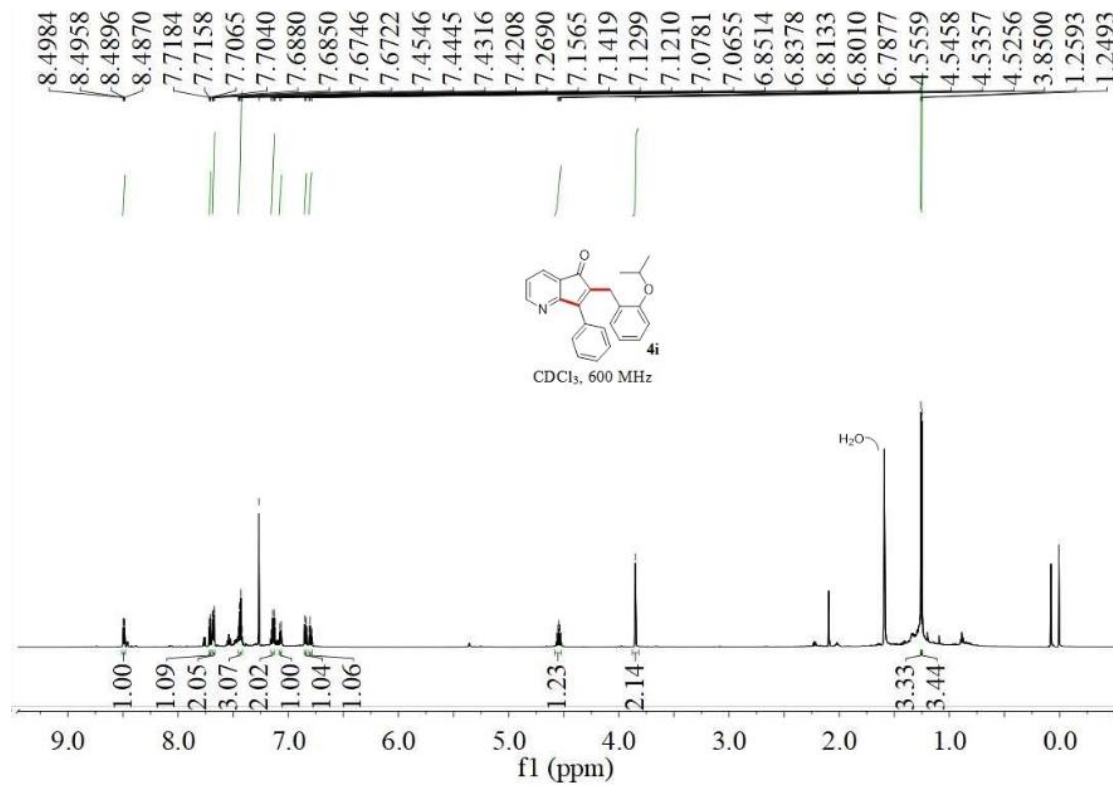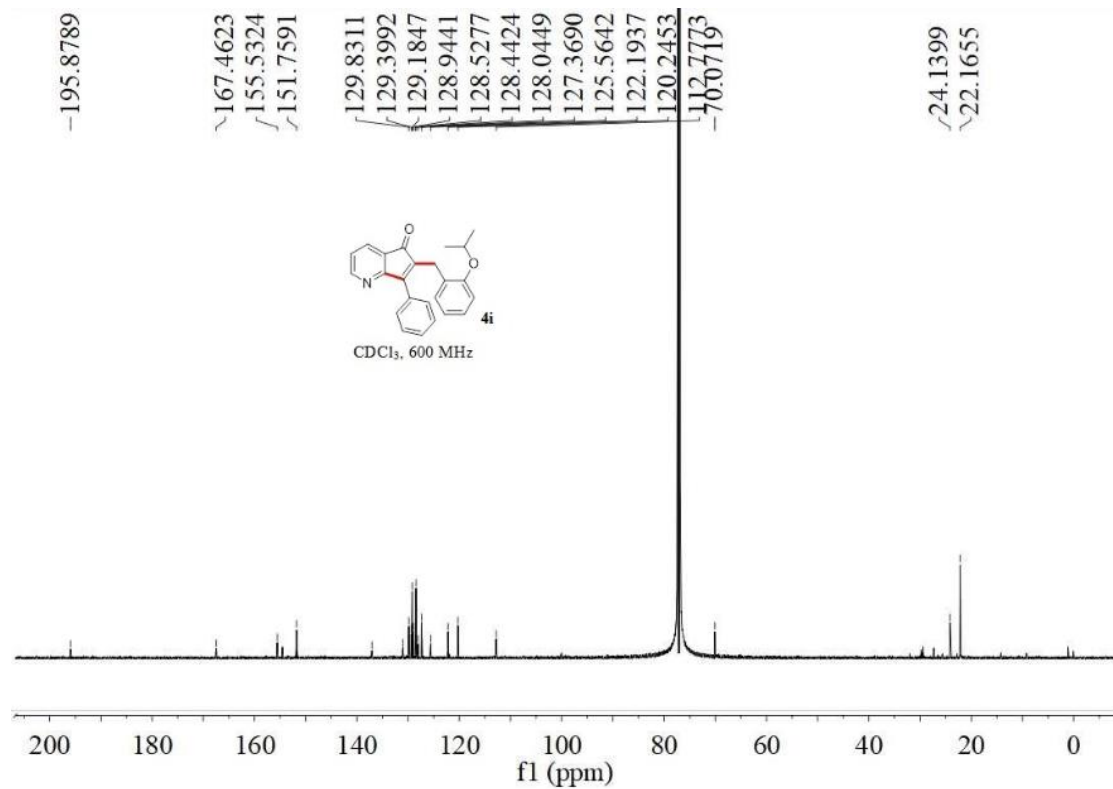

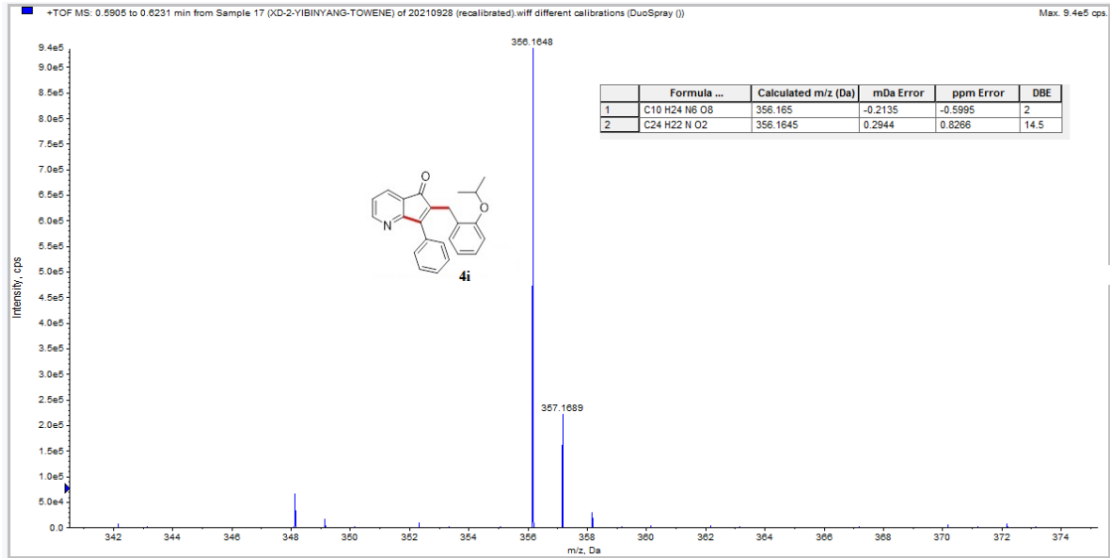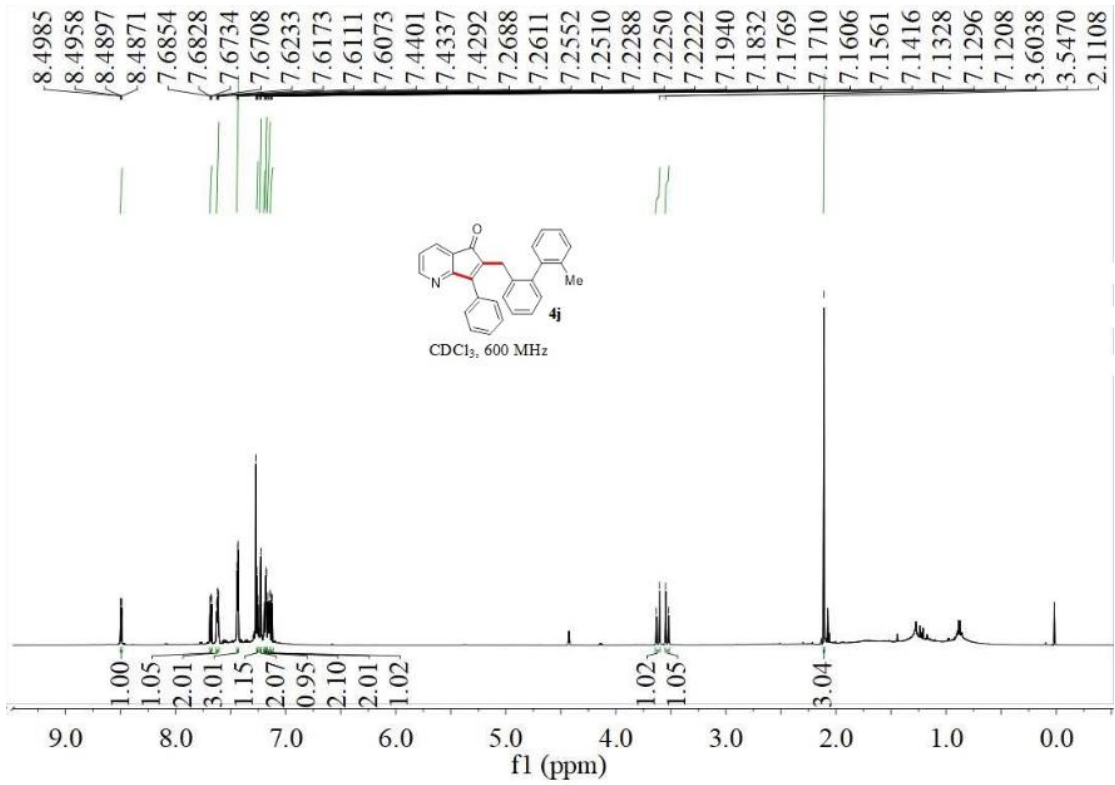

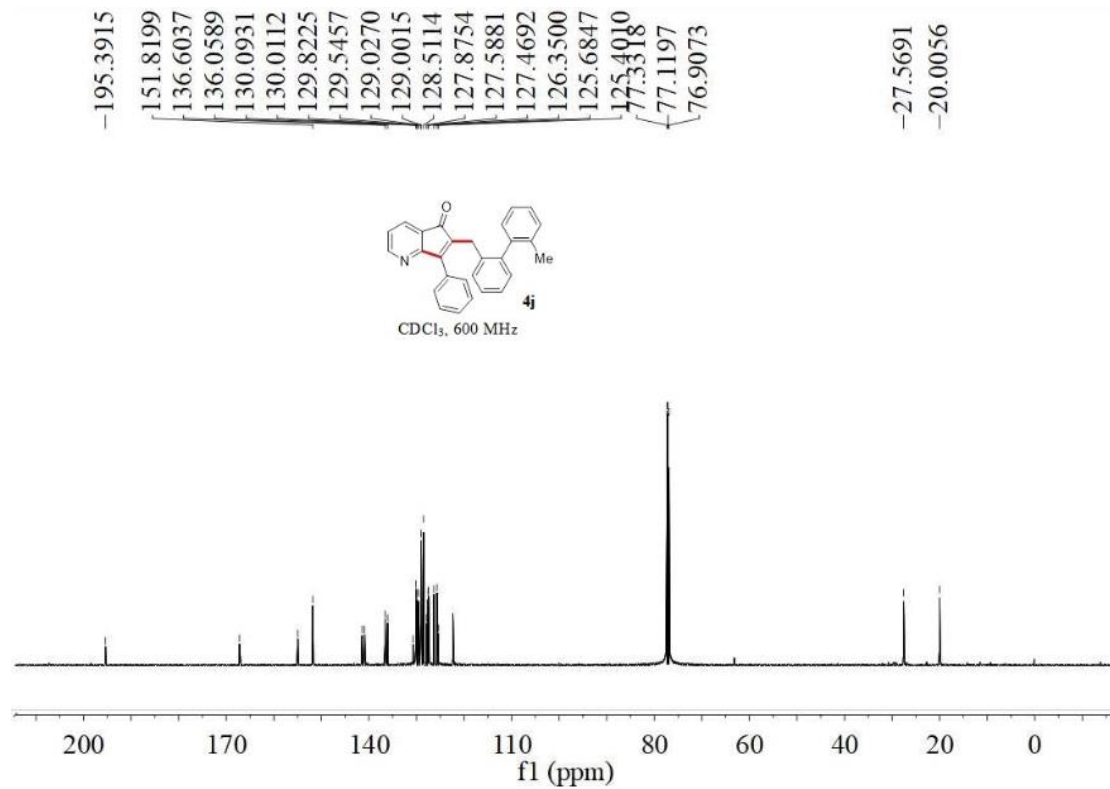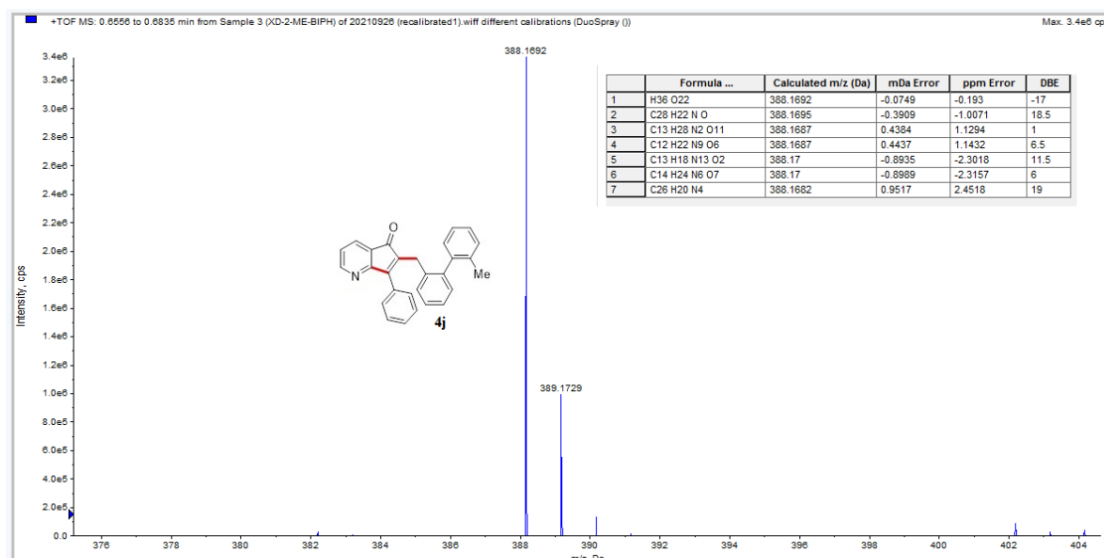

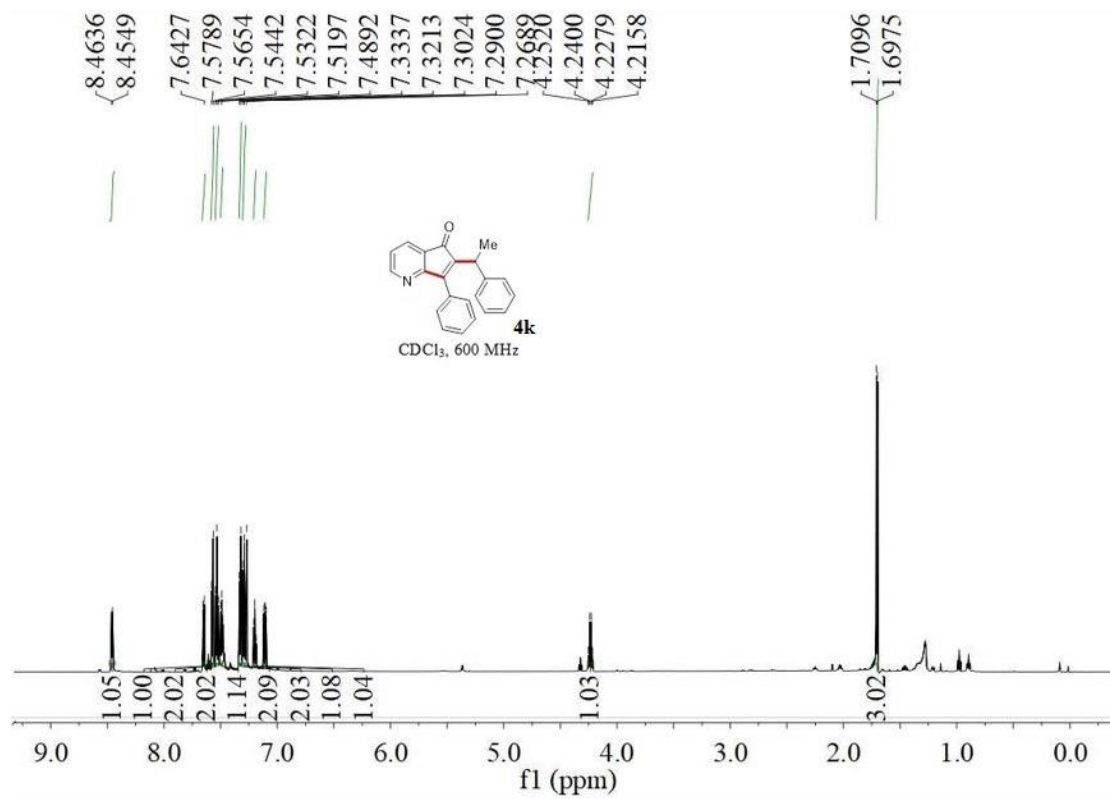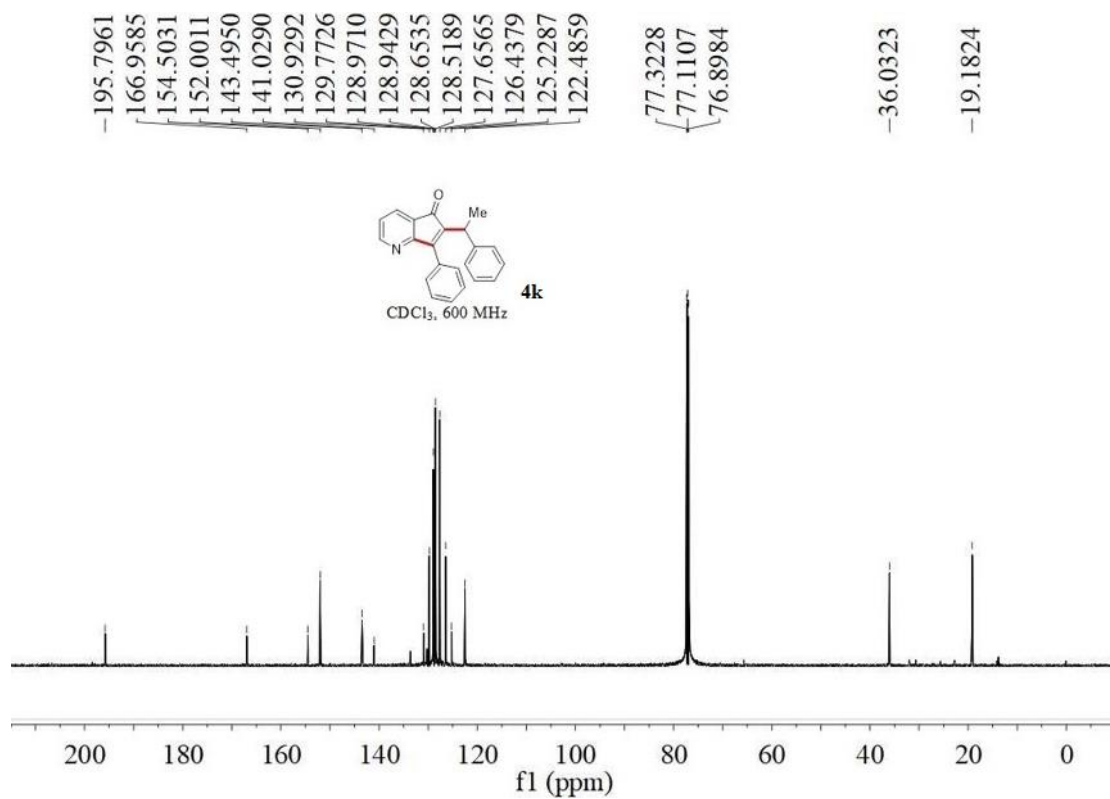



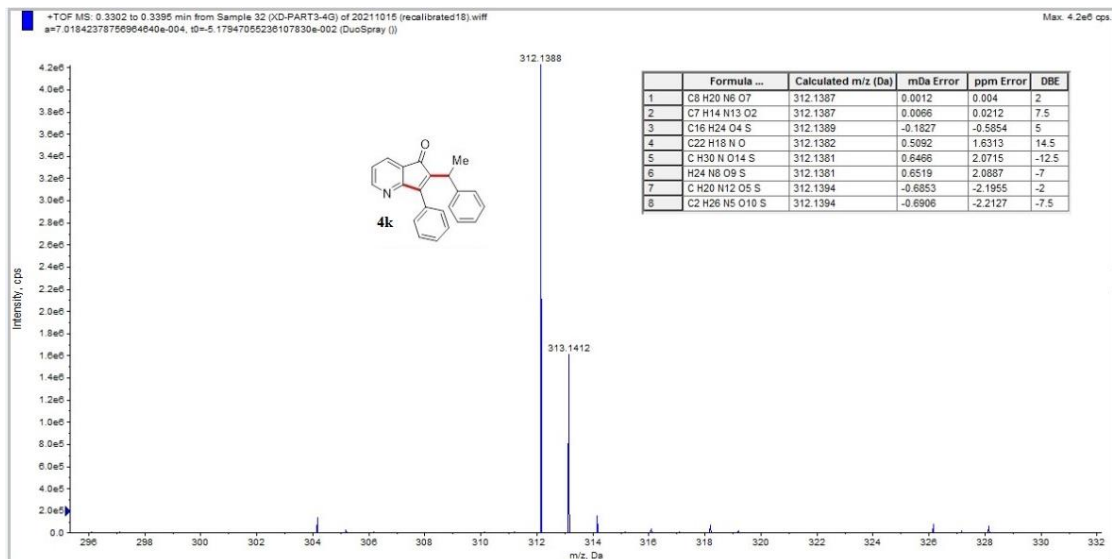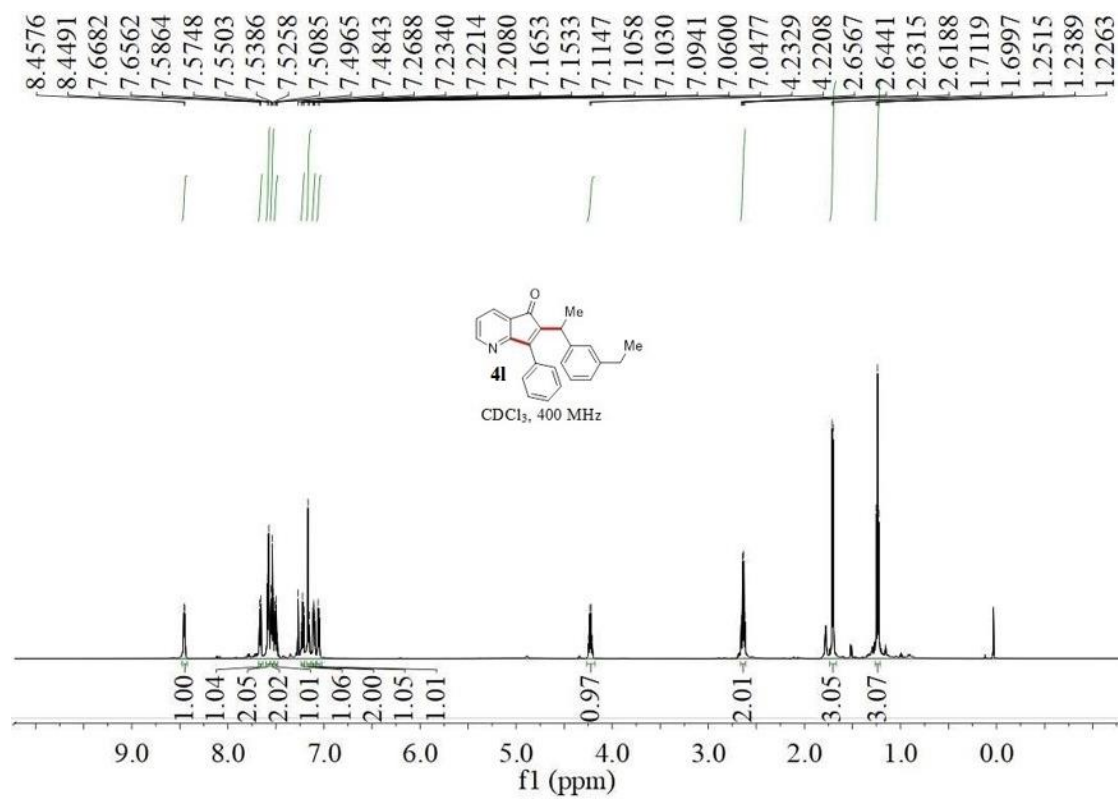

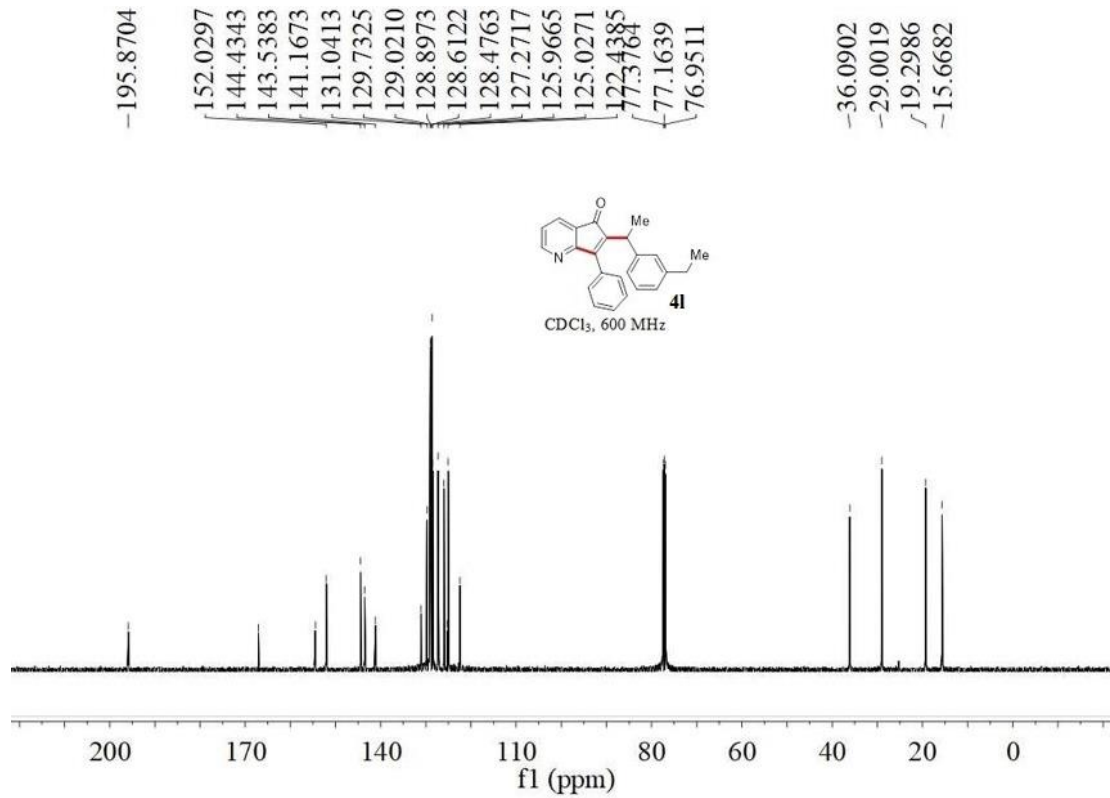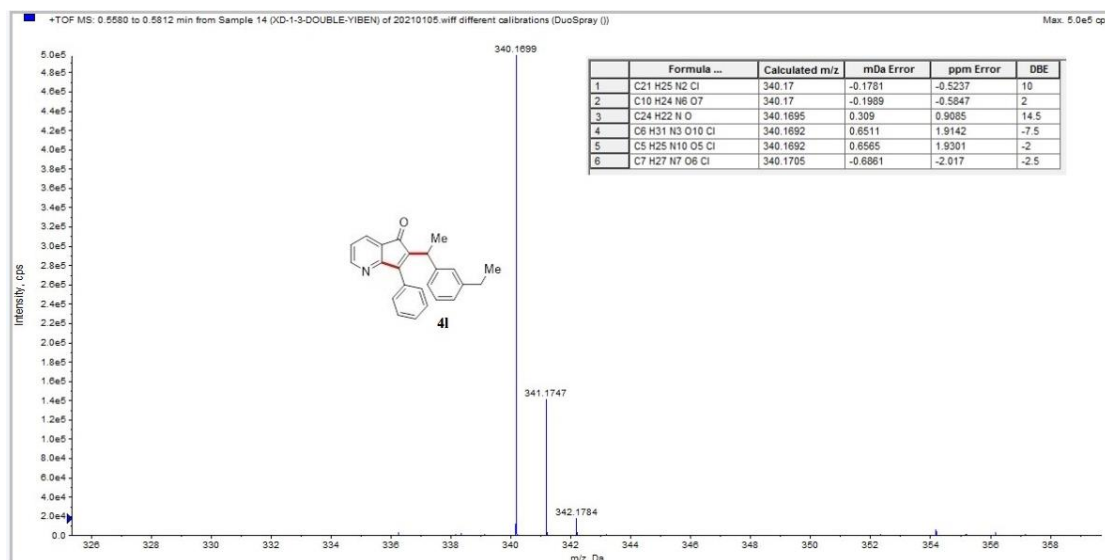

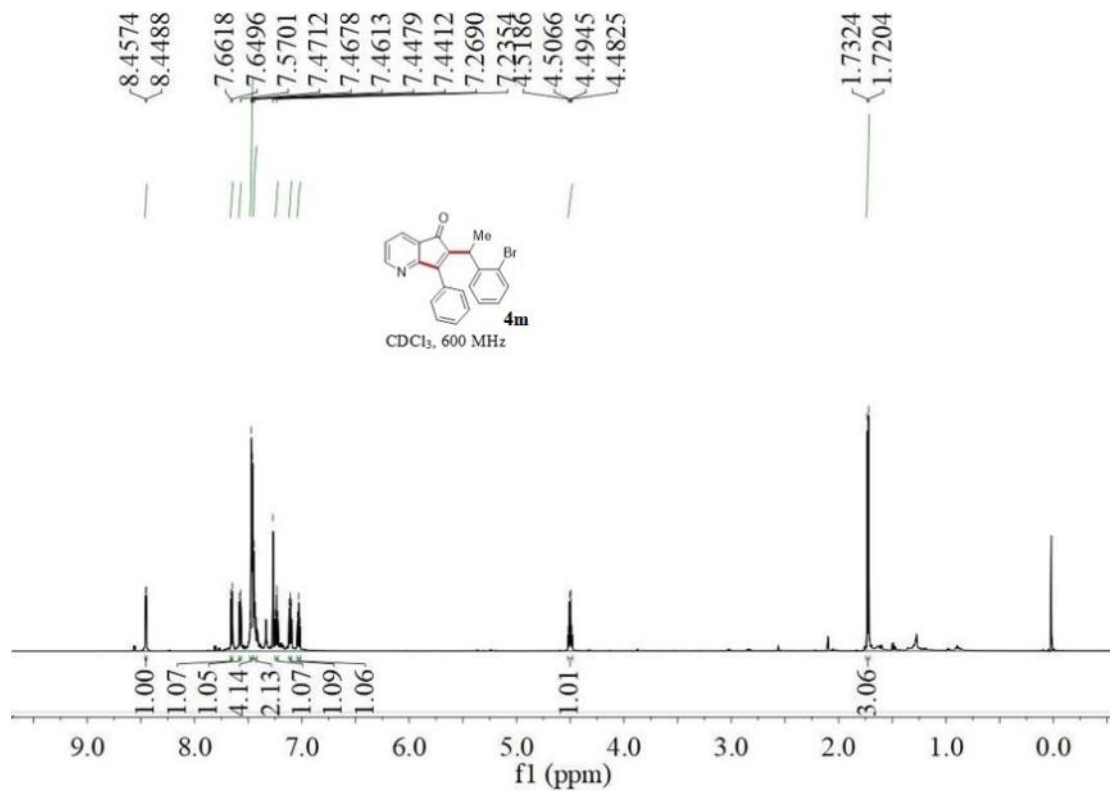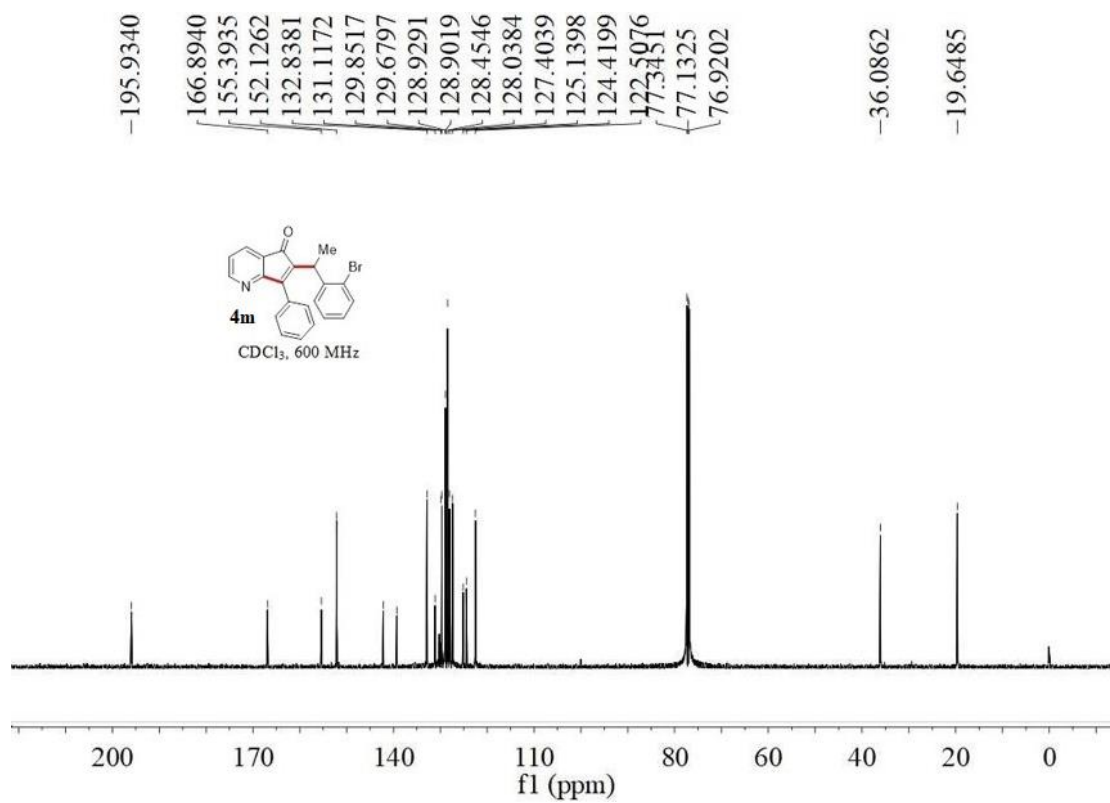

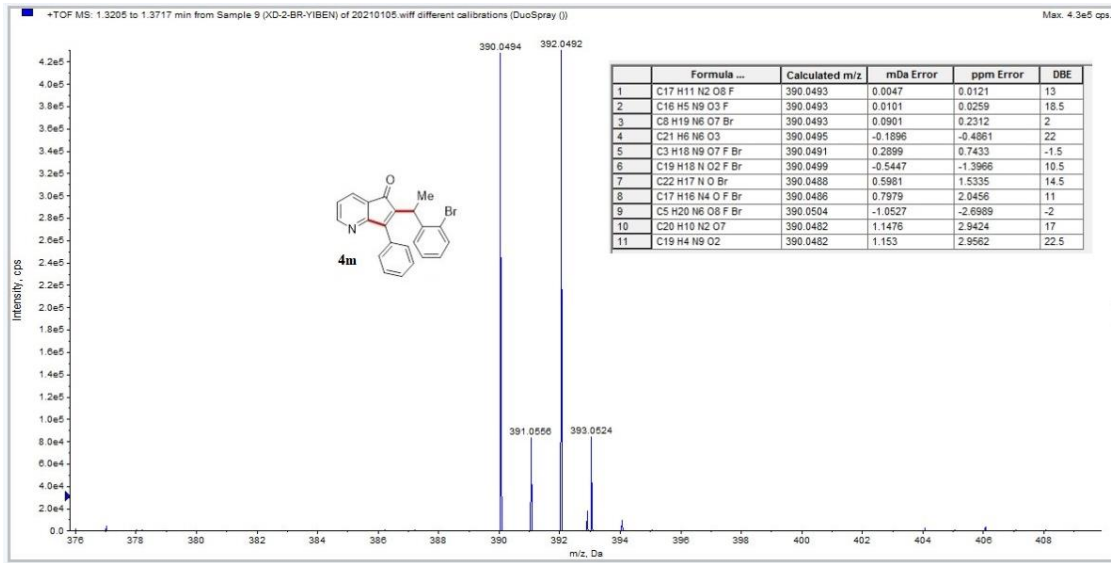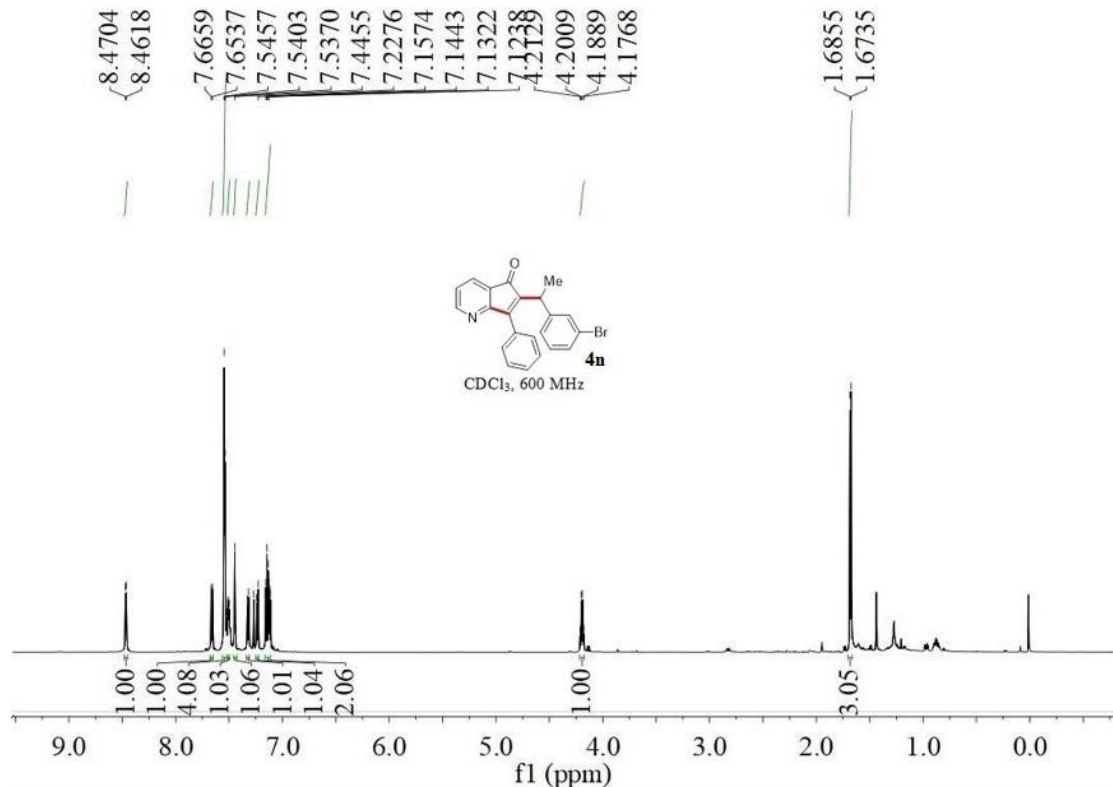

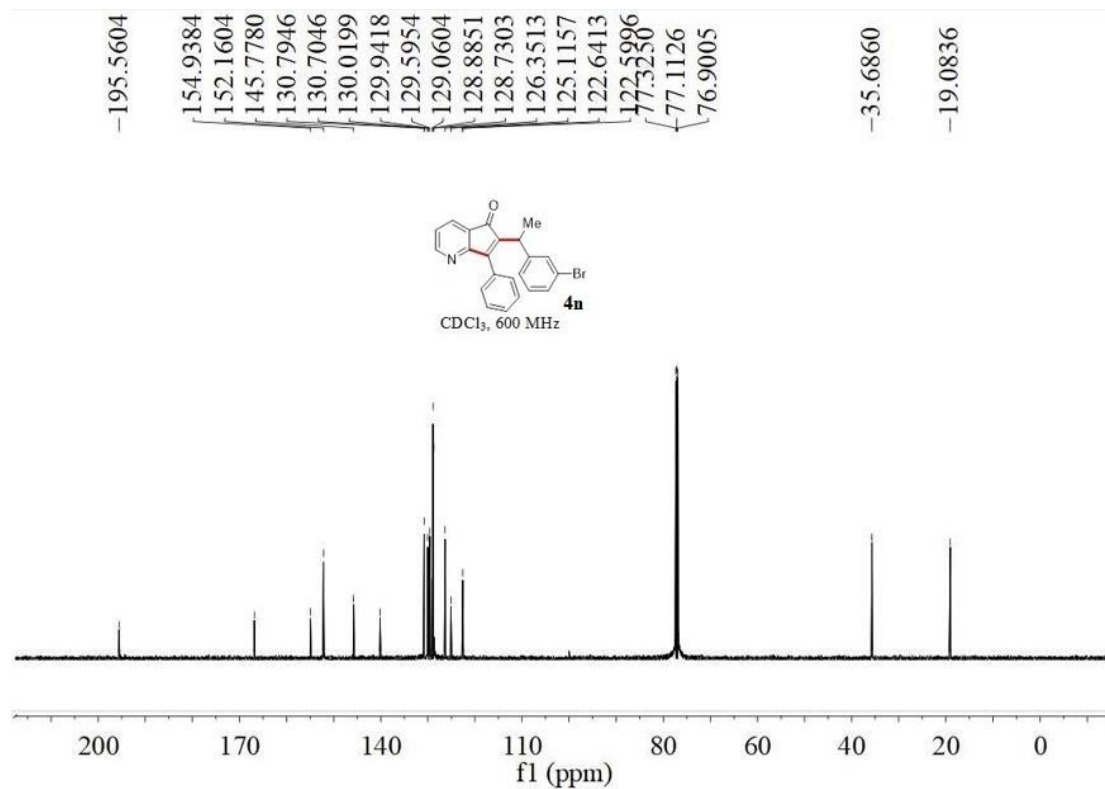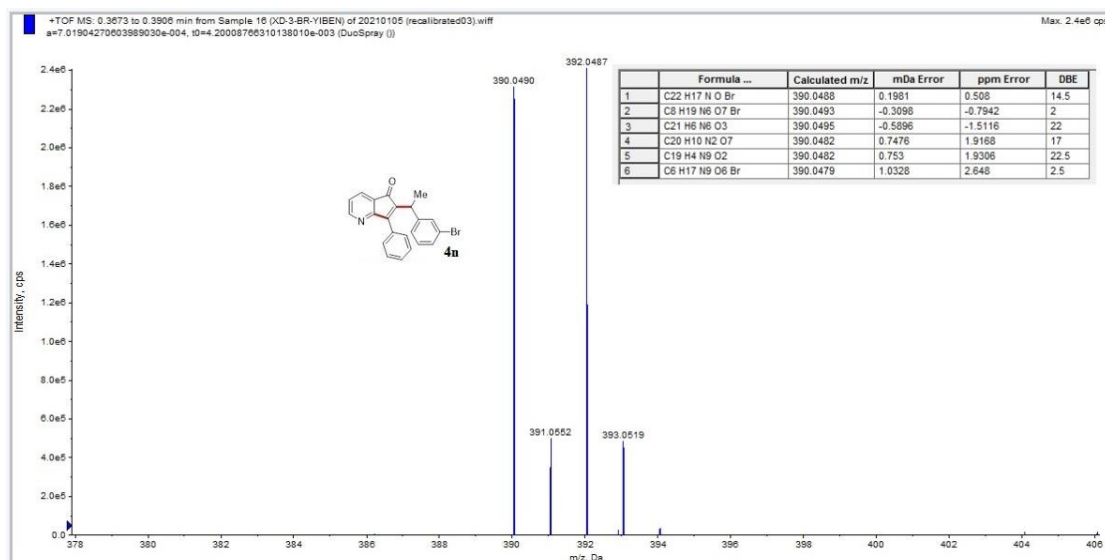

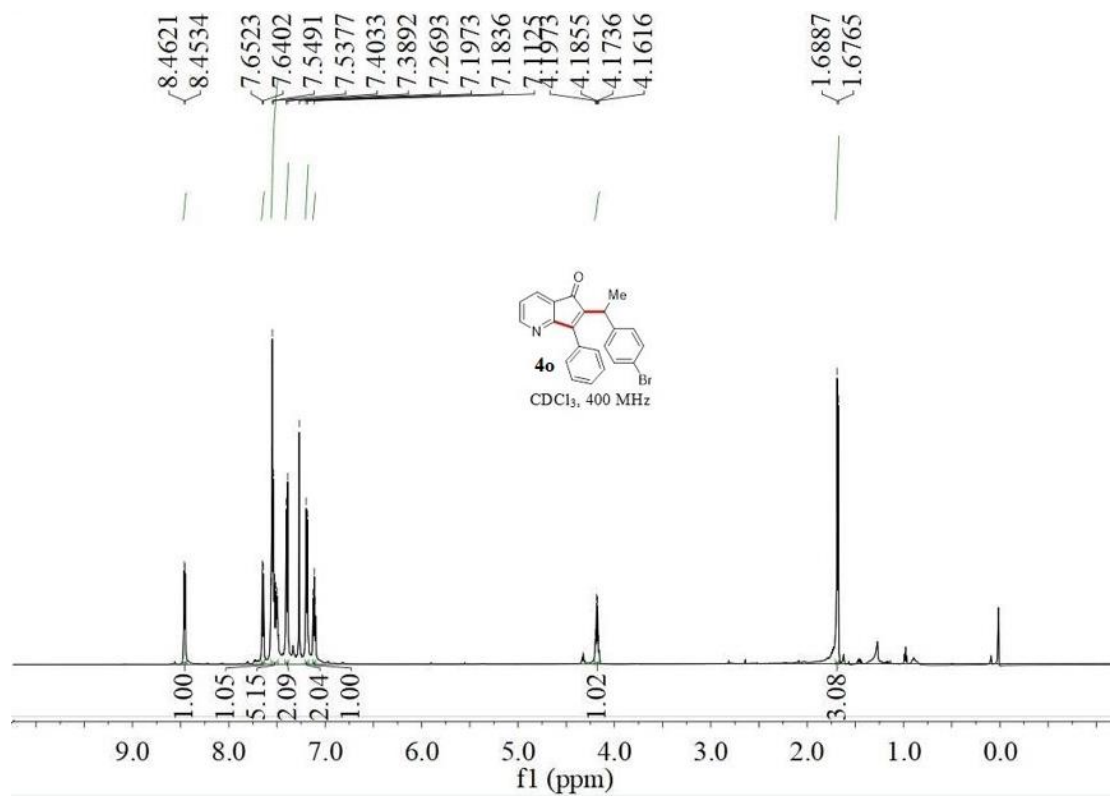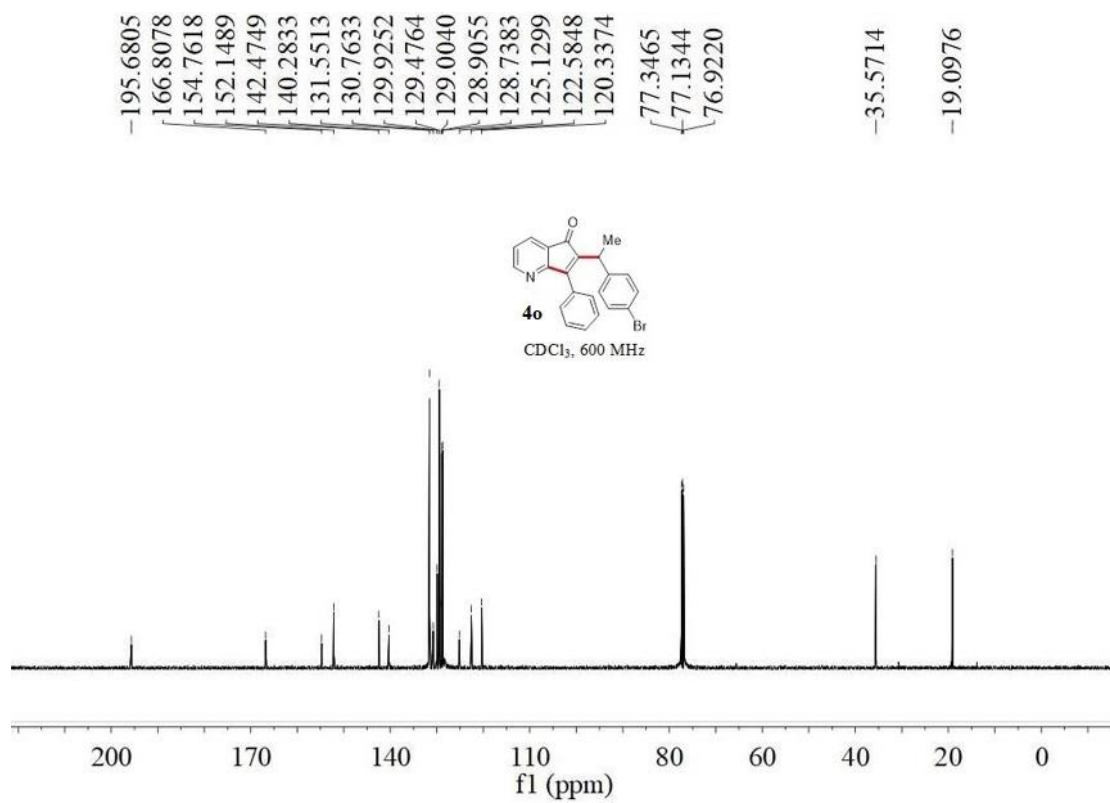

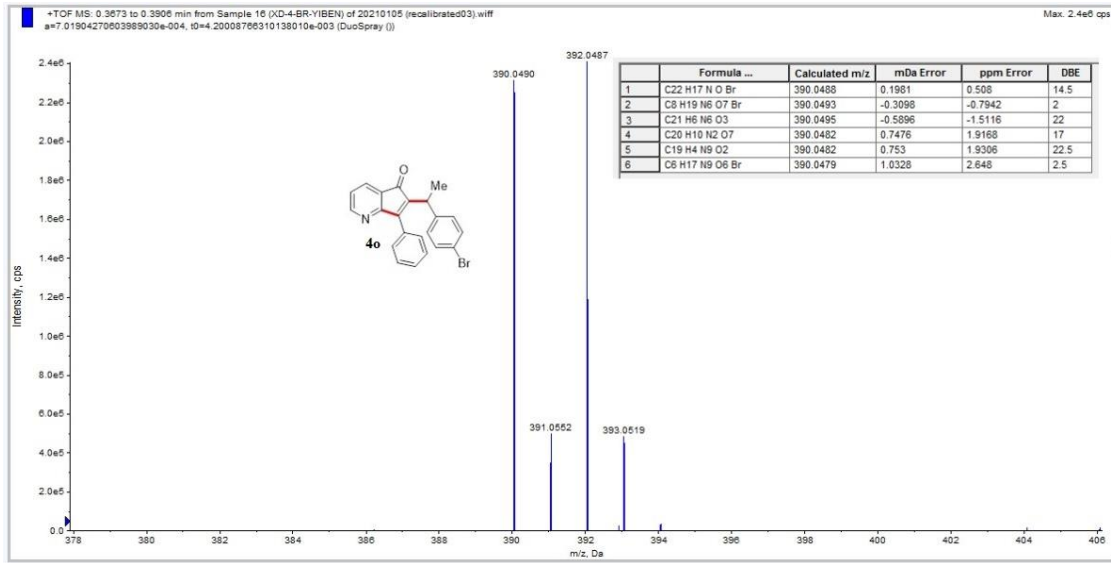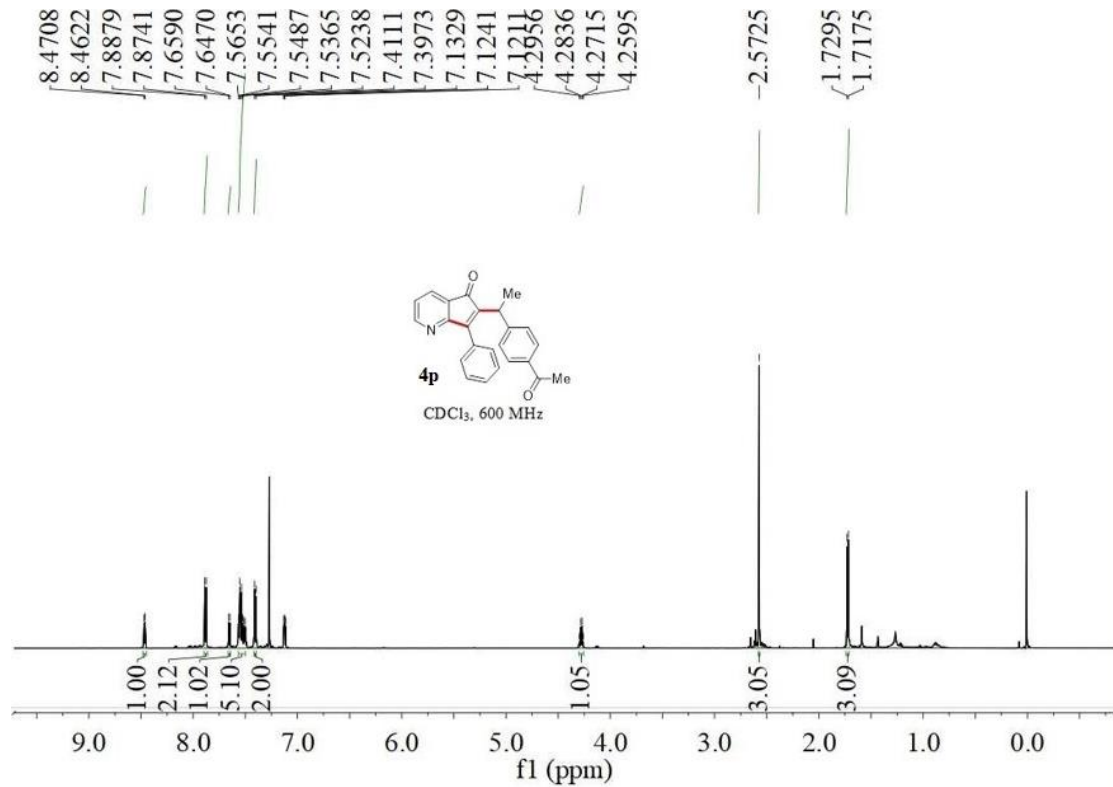

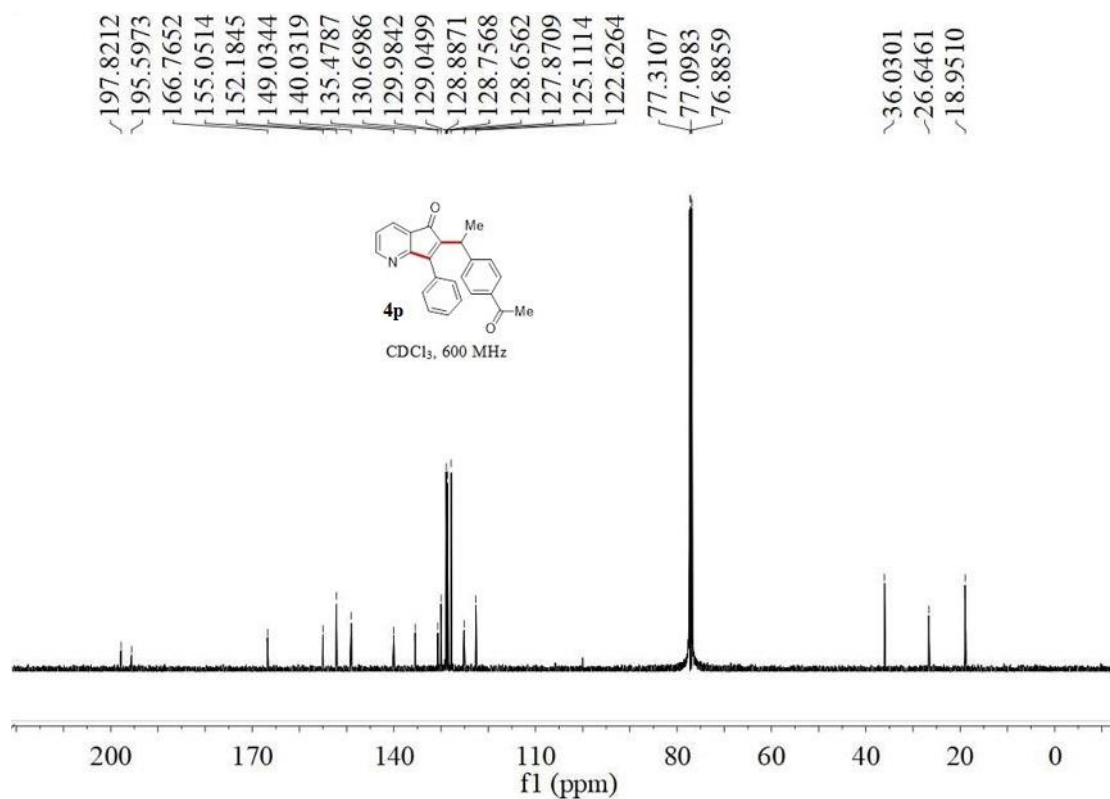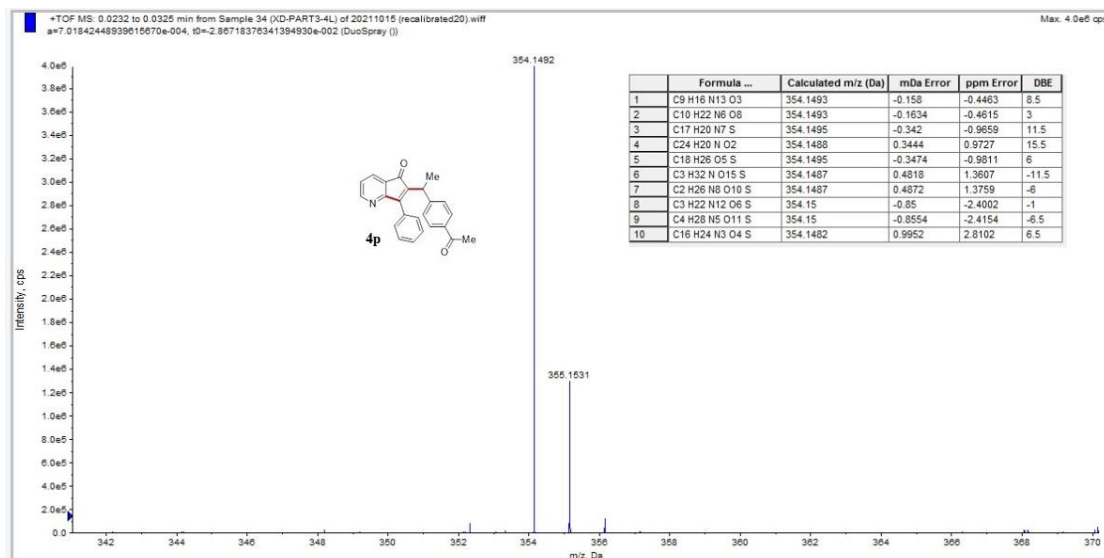



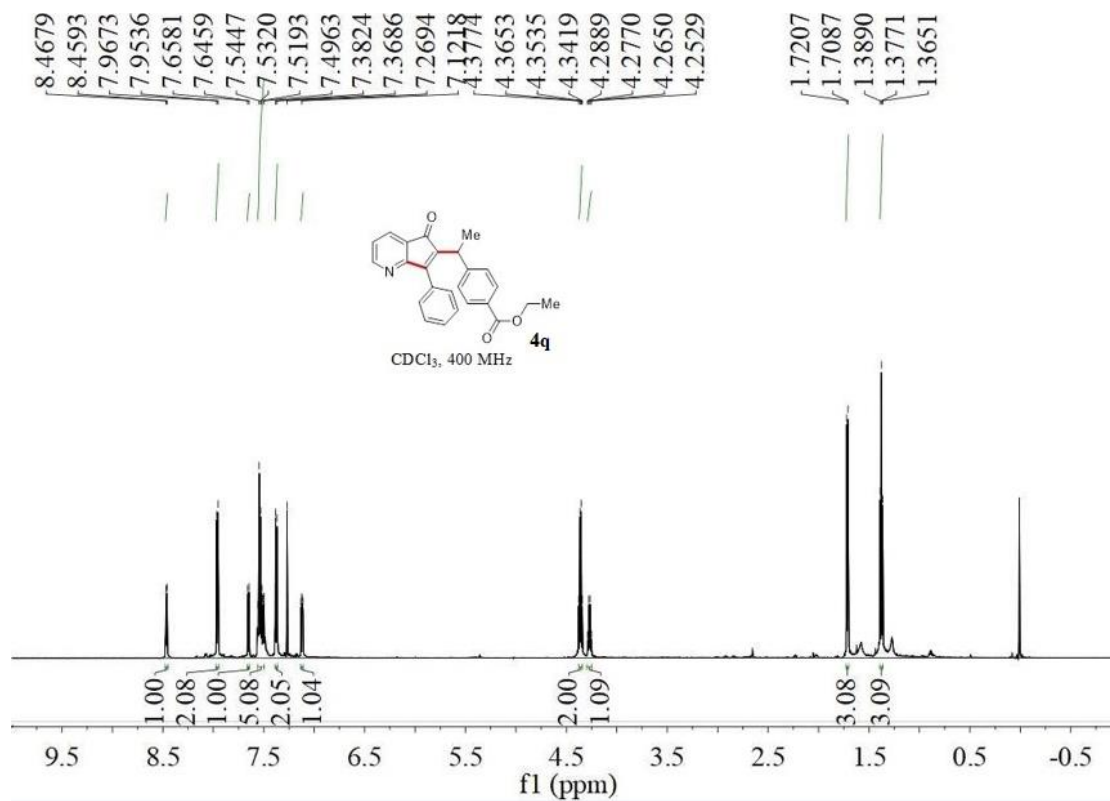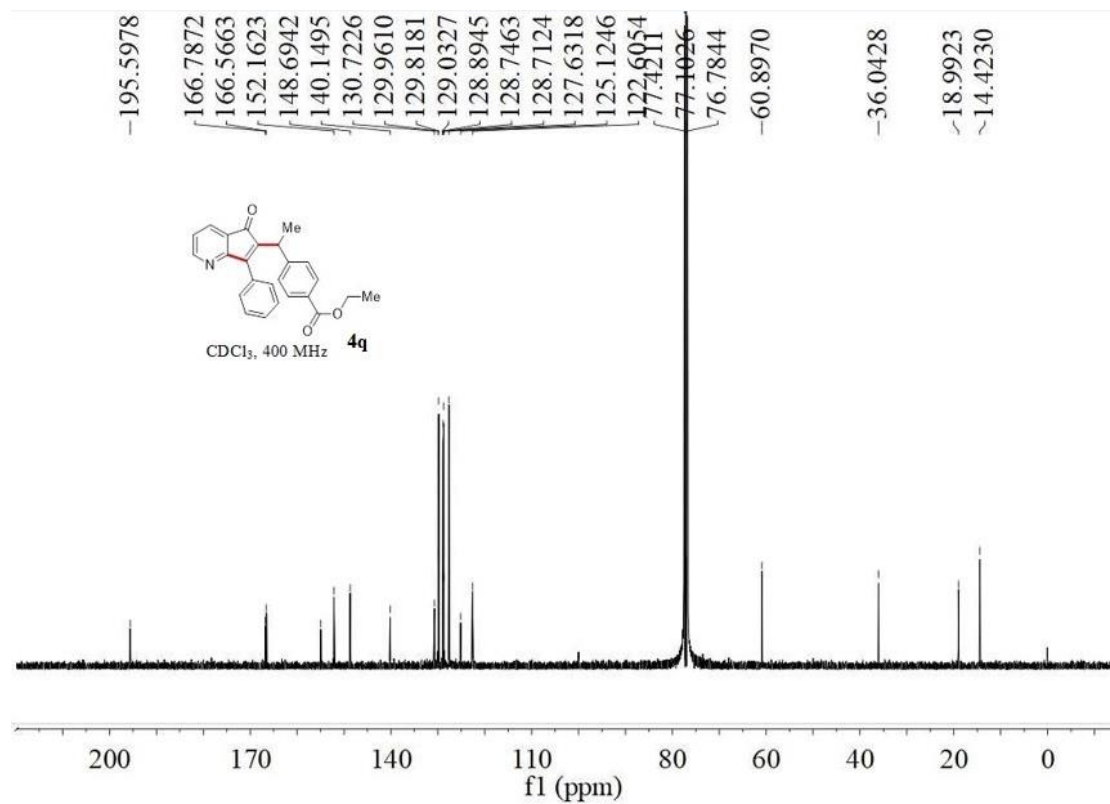

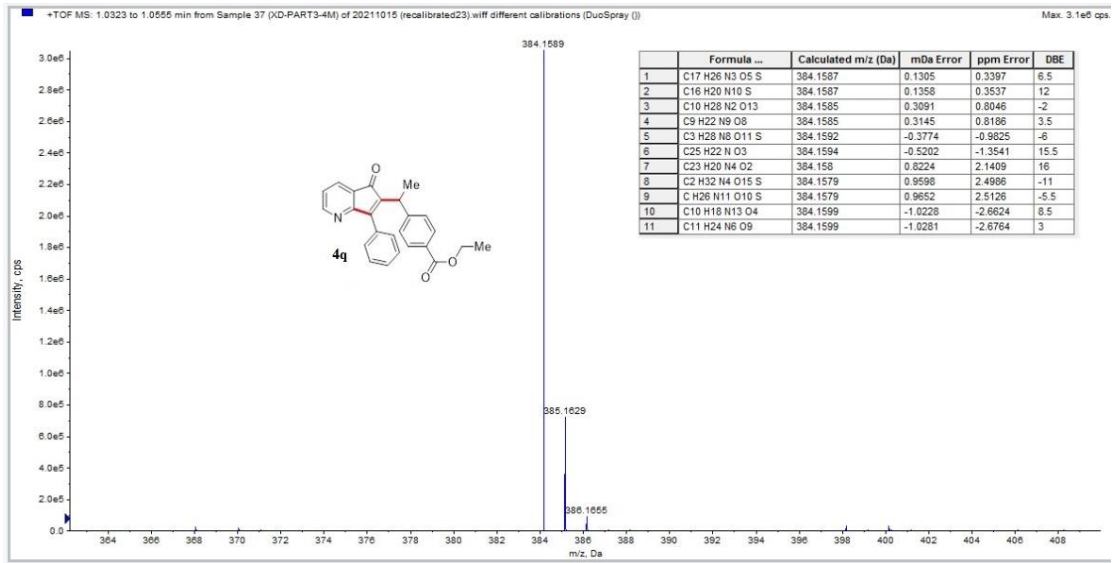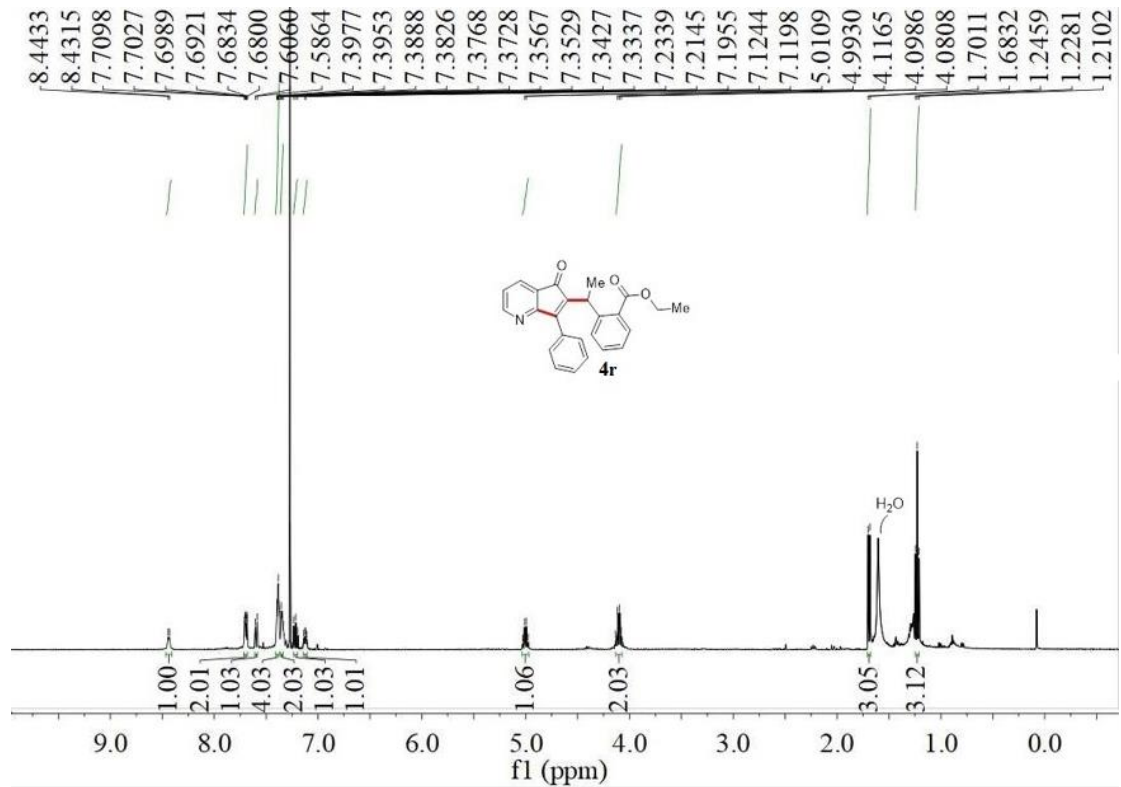

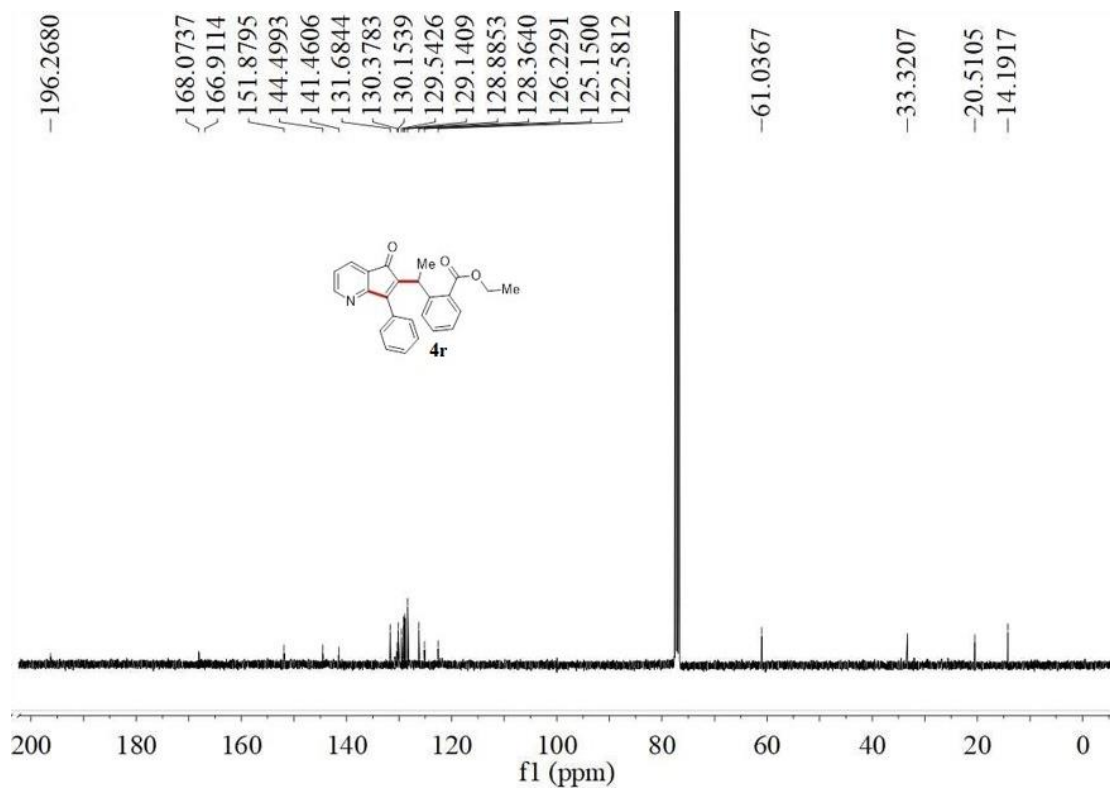

Acq. File: 20211009 (recalibrated10).wiff

Sample Name: XD-PART3-2-YIZHI  
Sample Number: N/A

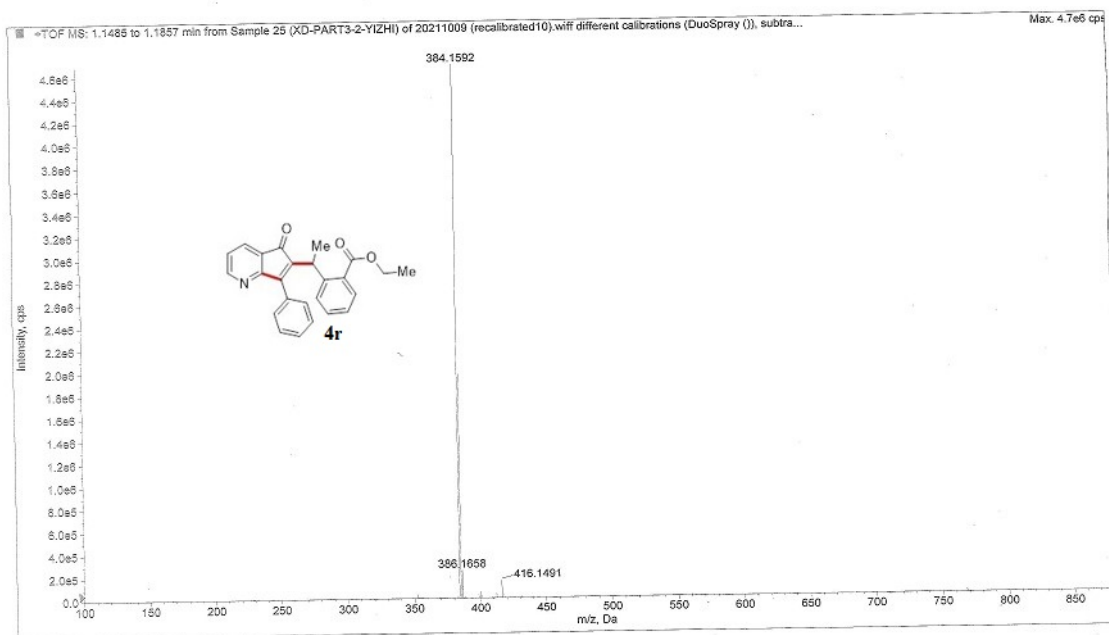

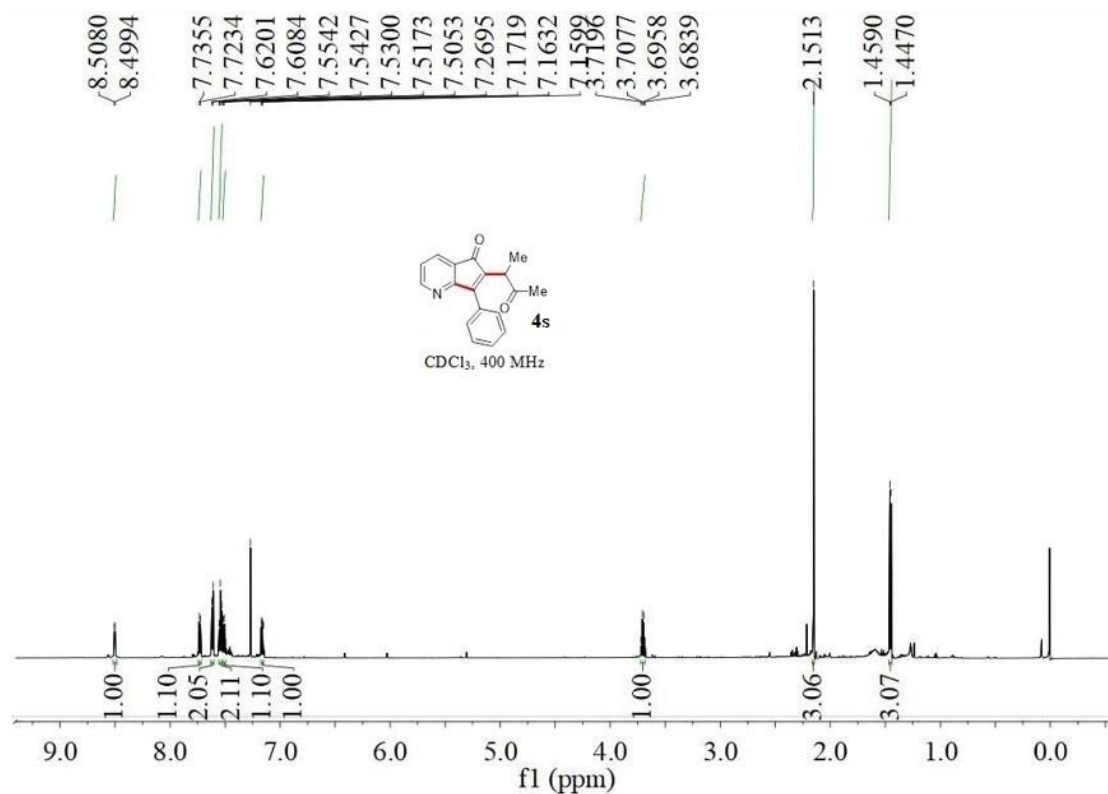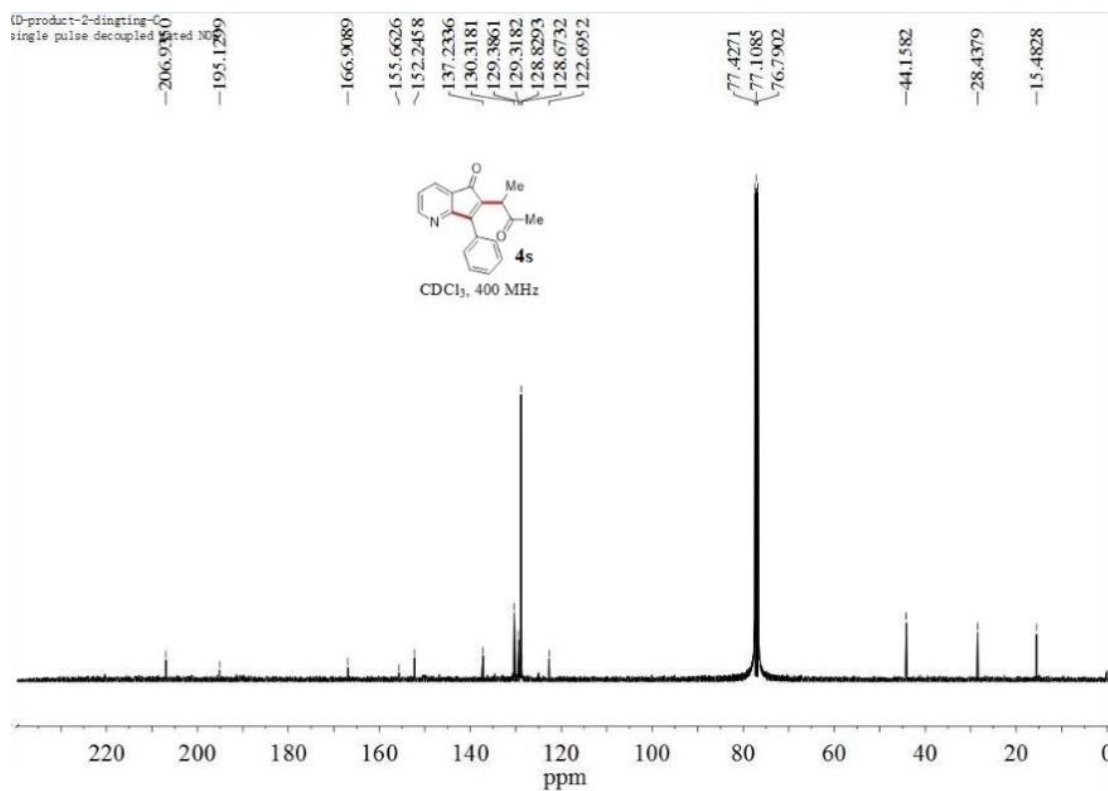

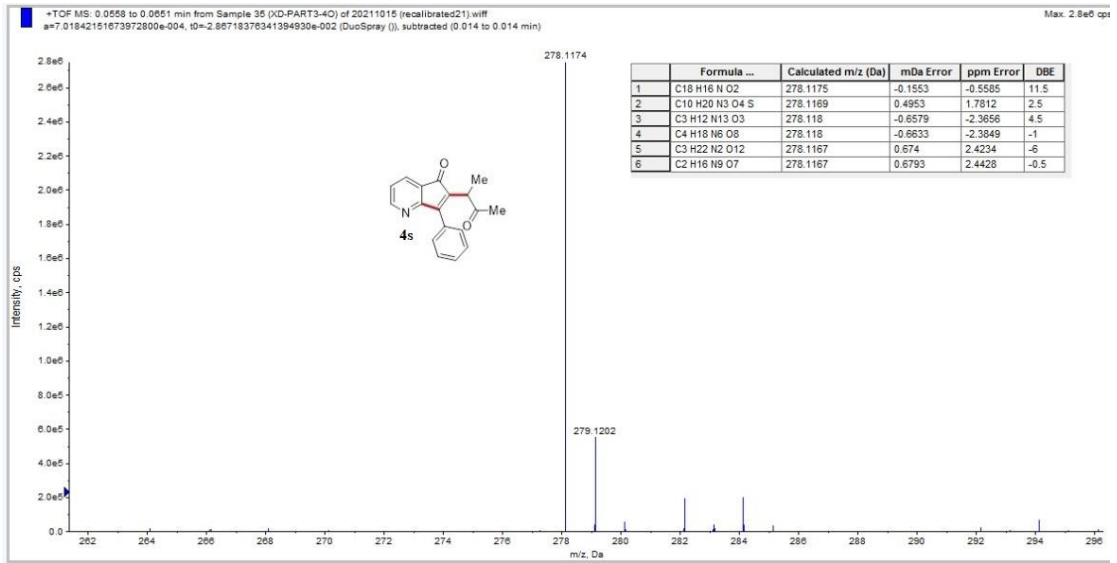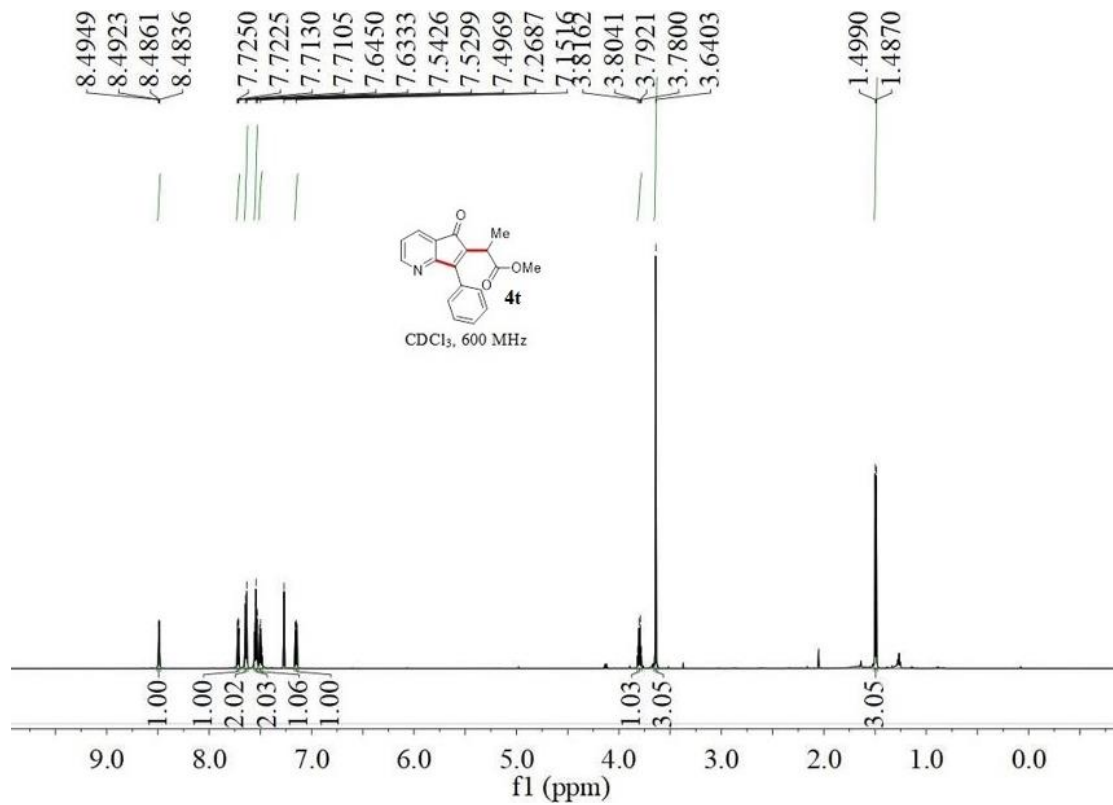

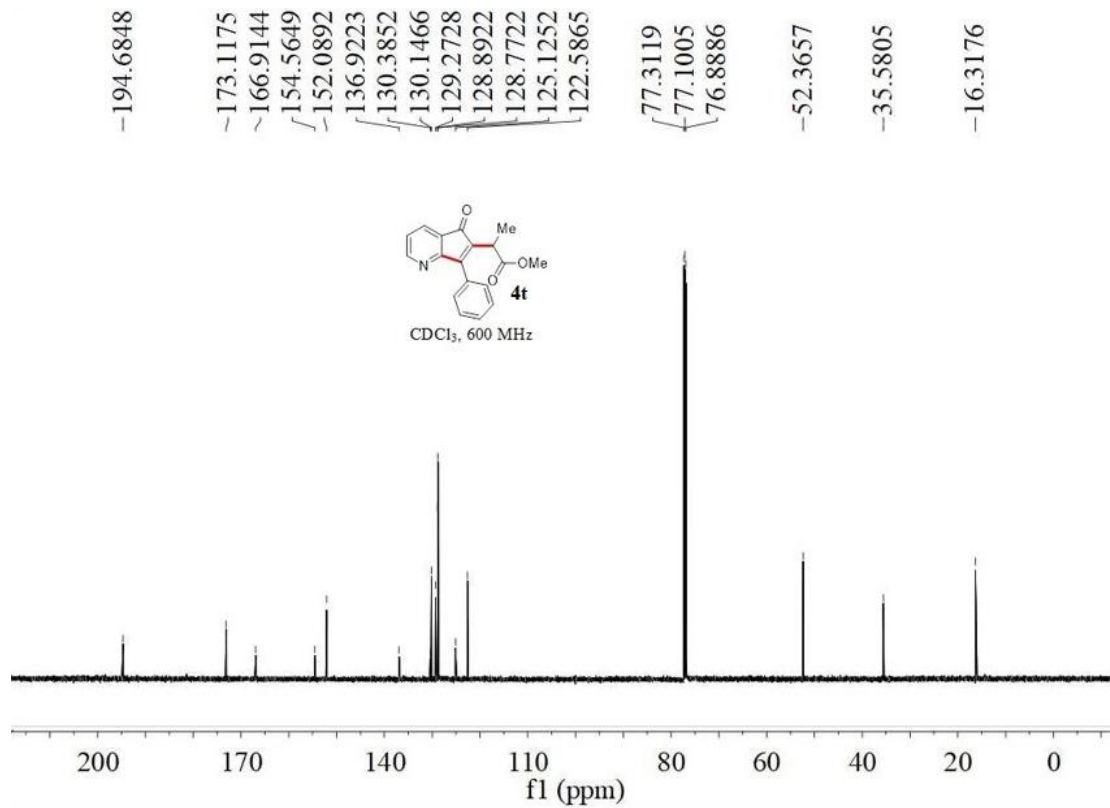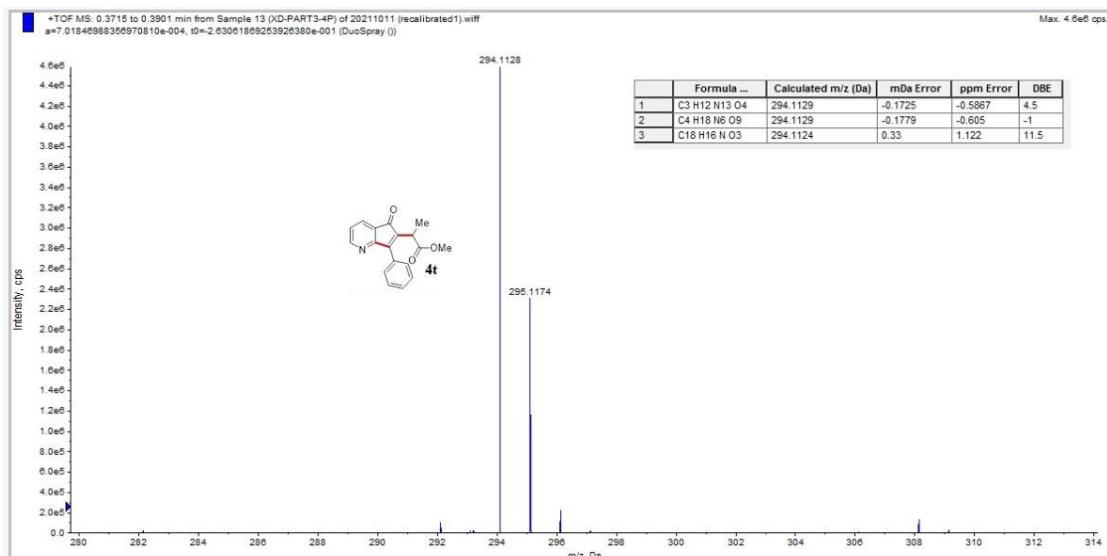

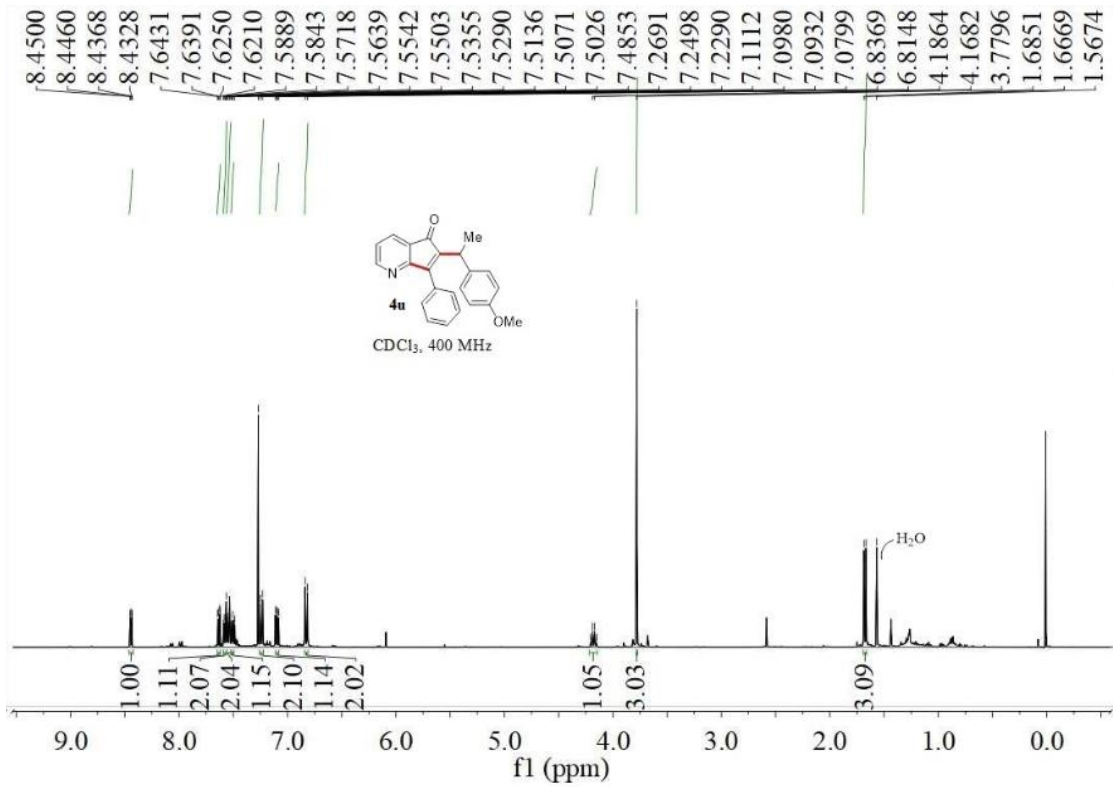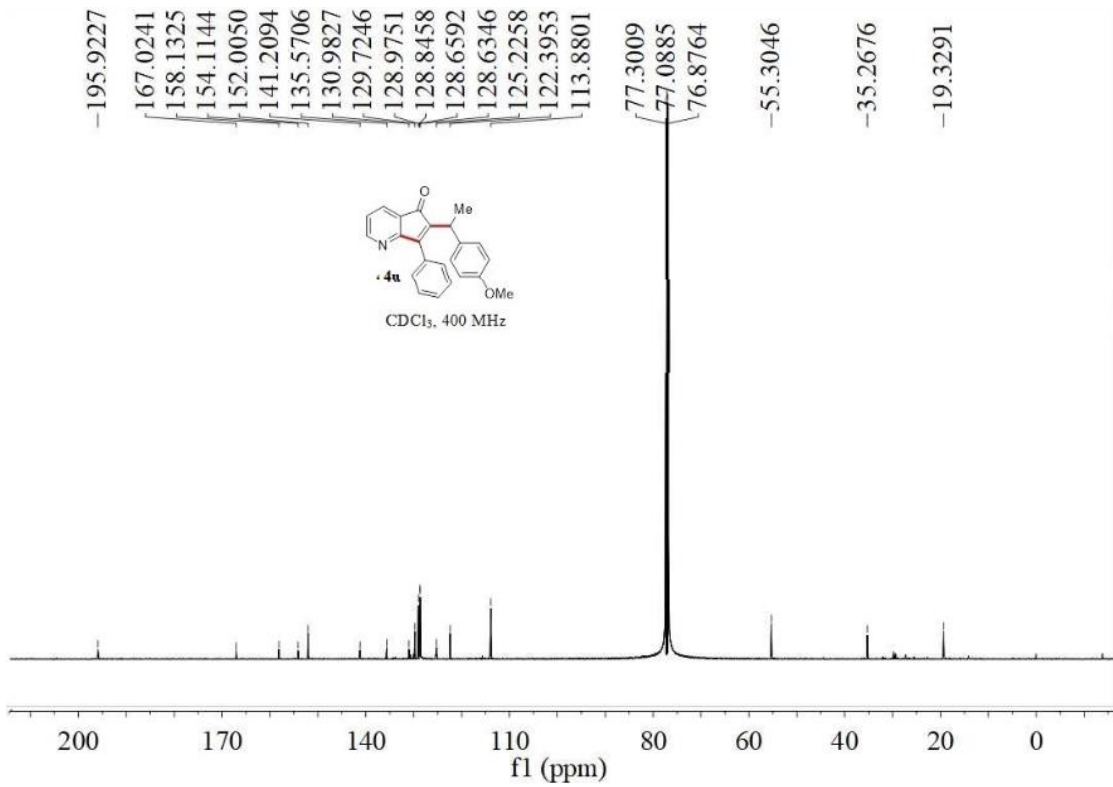

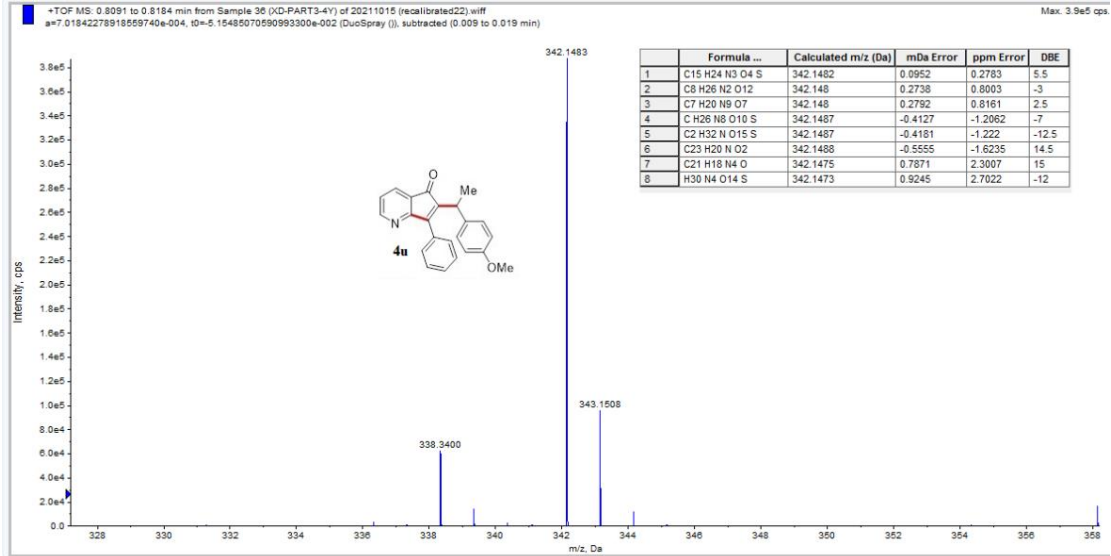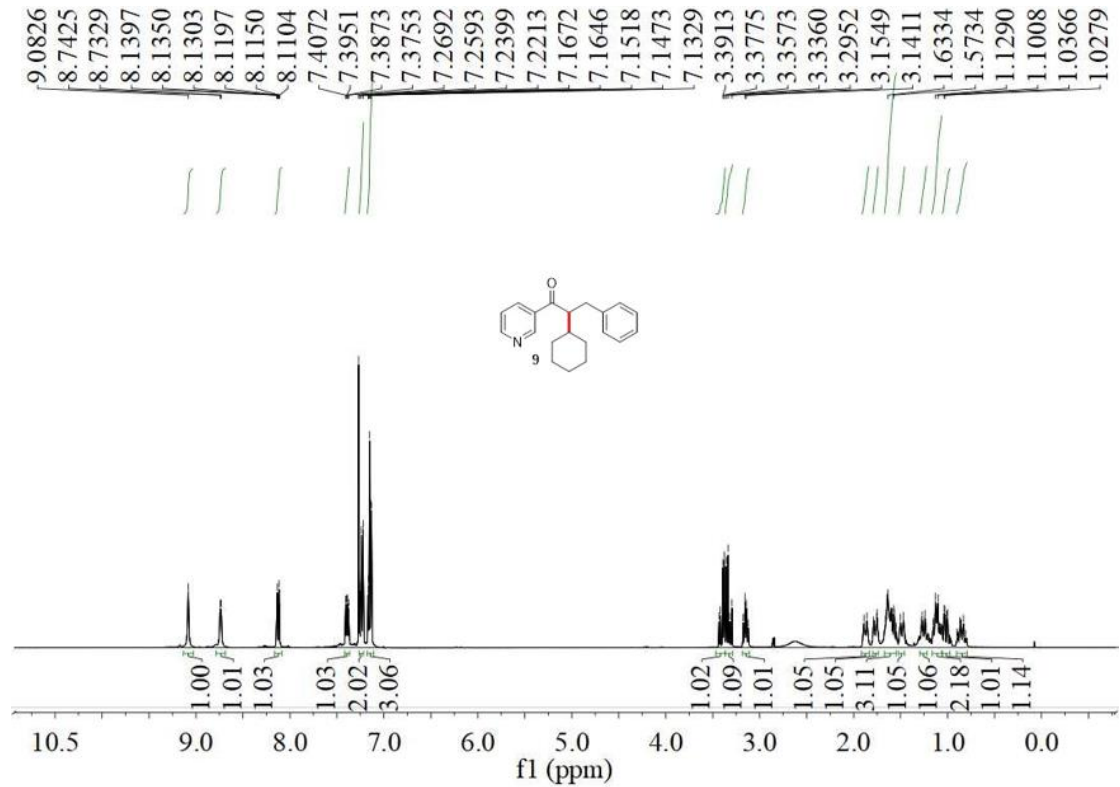



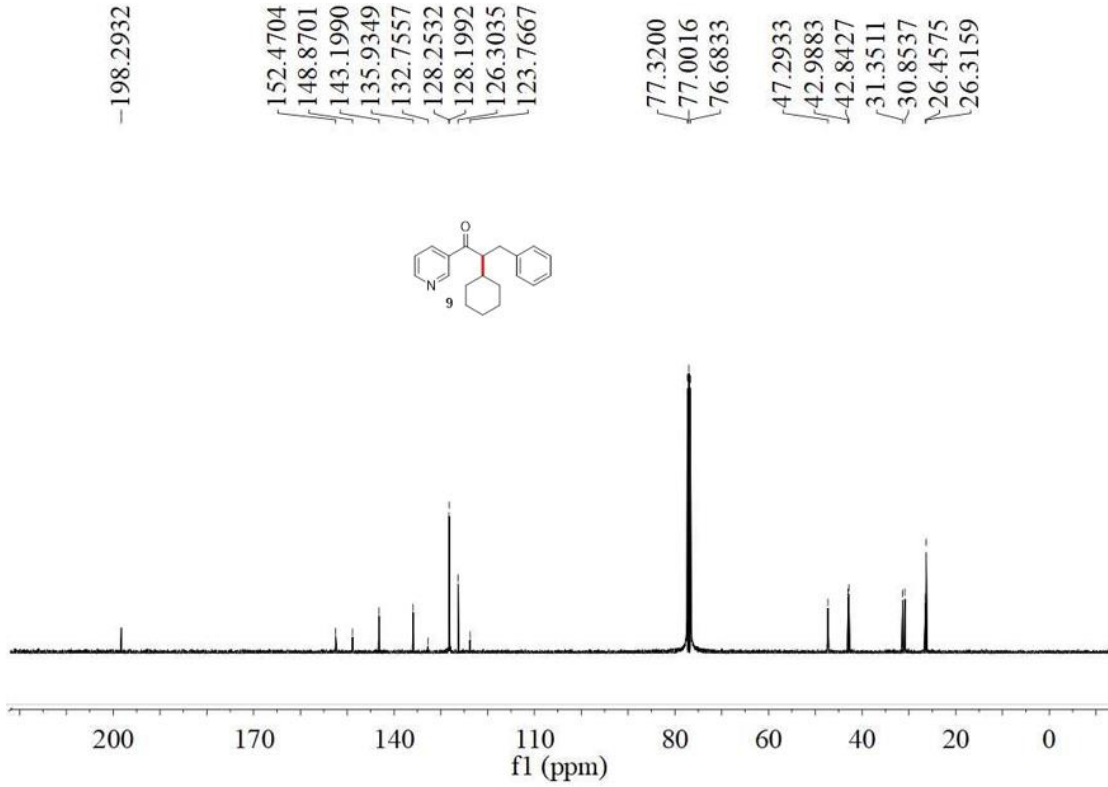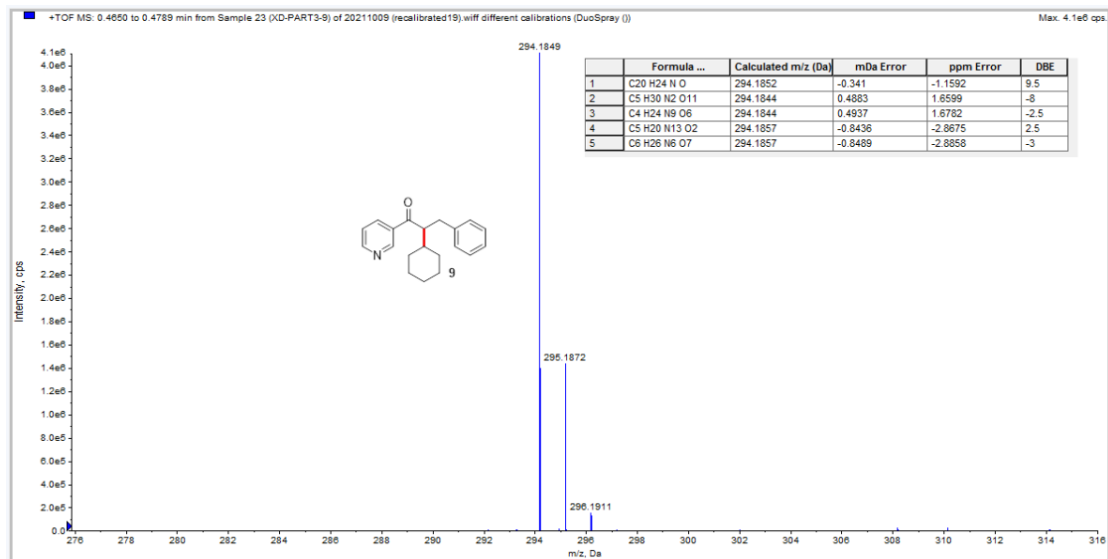

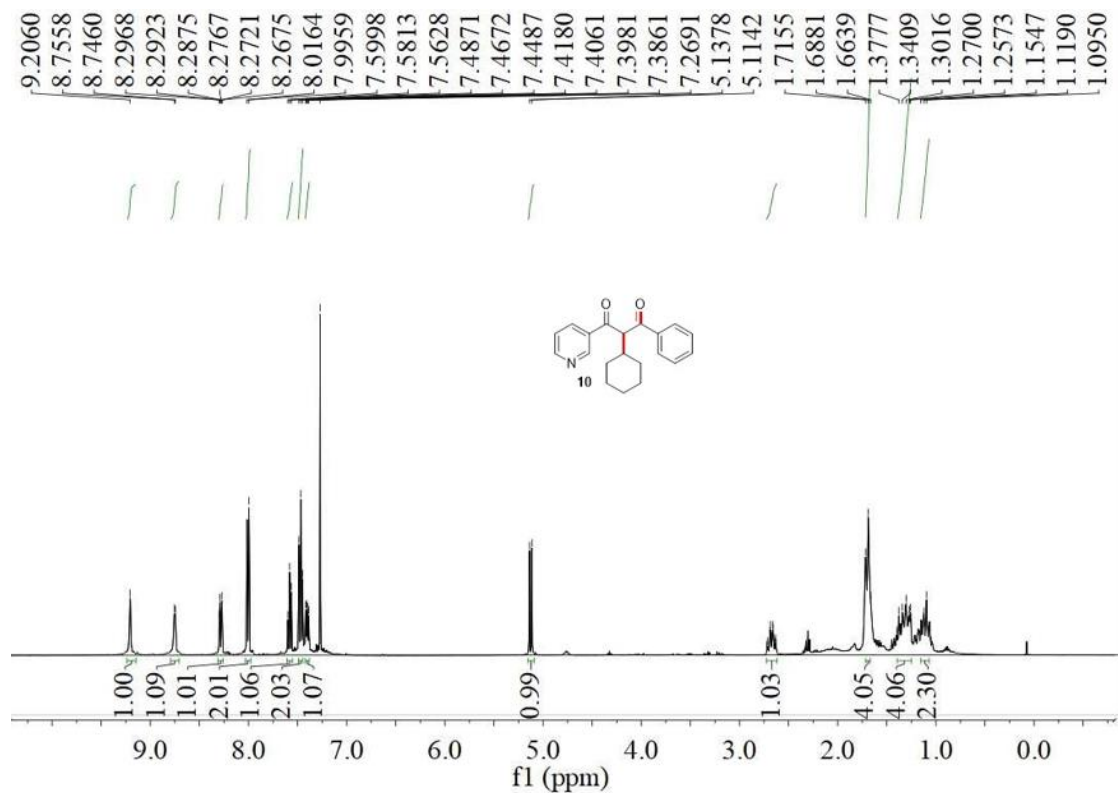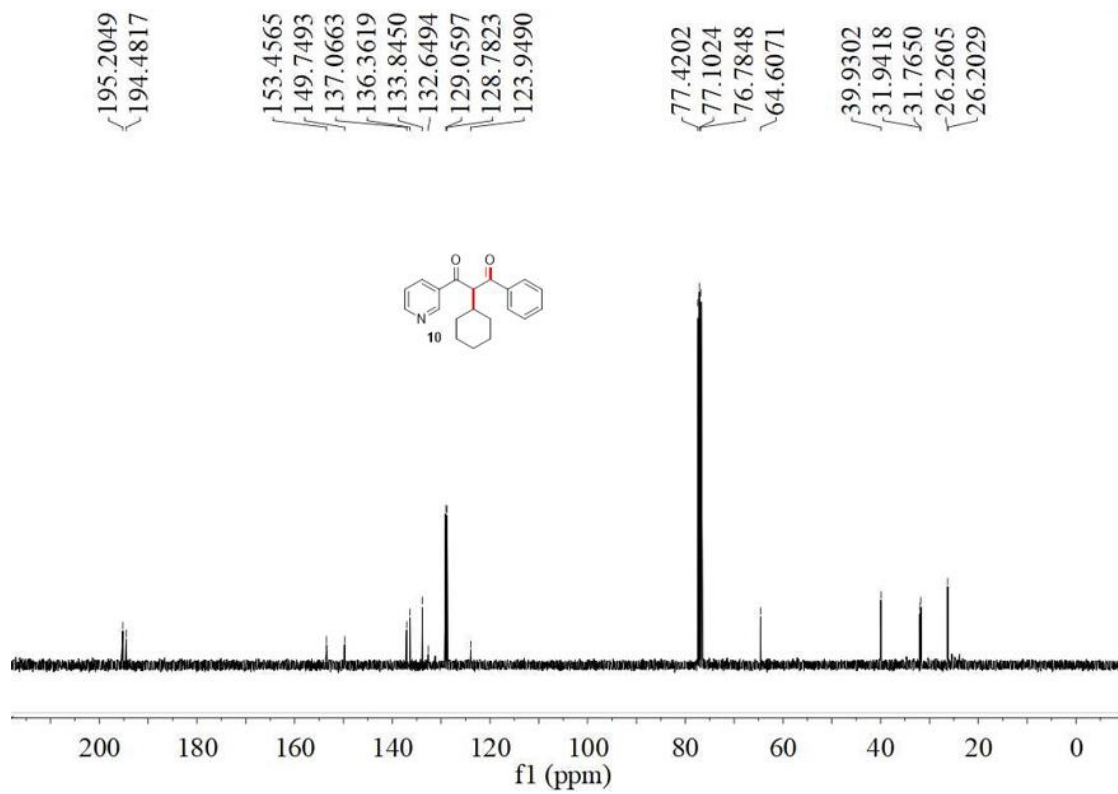

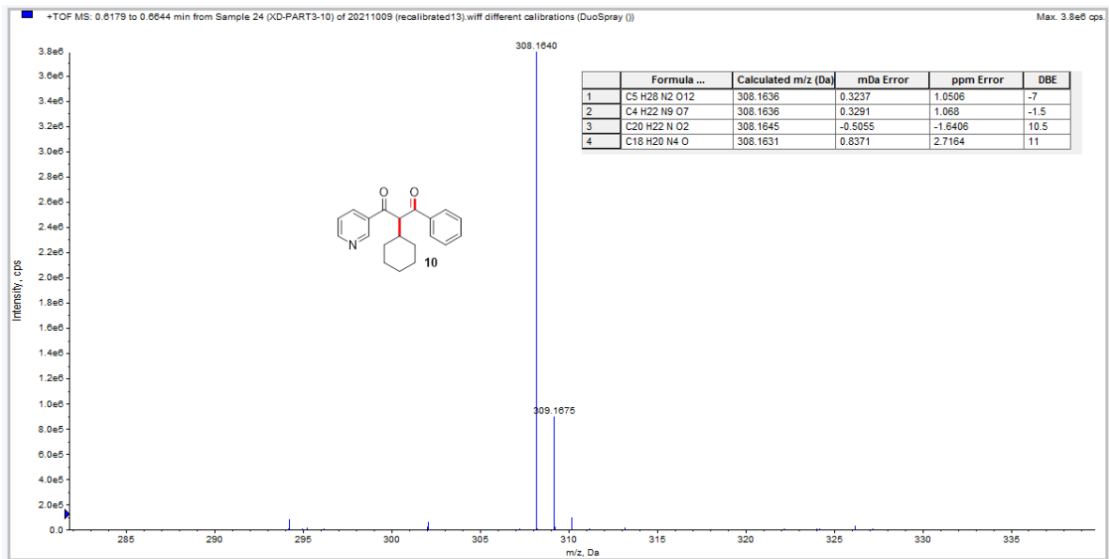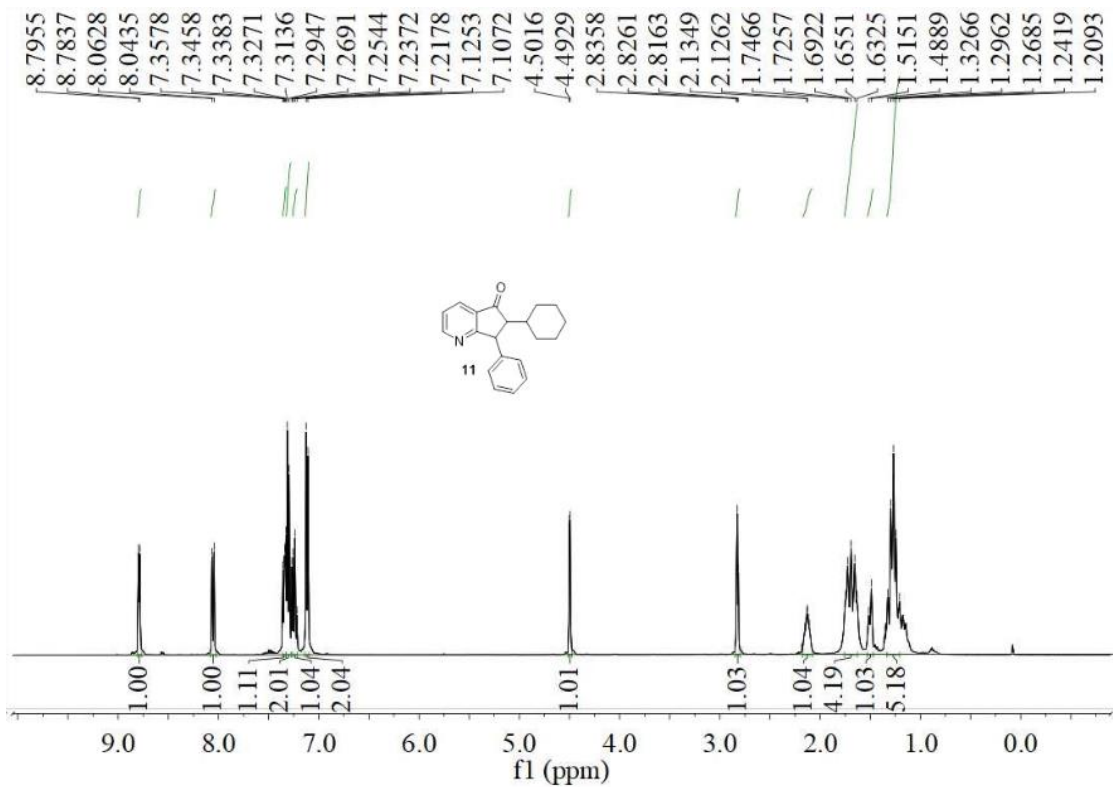

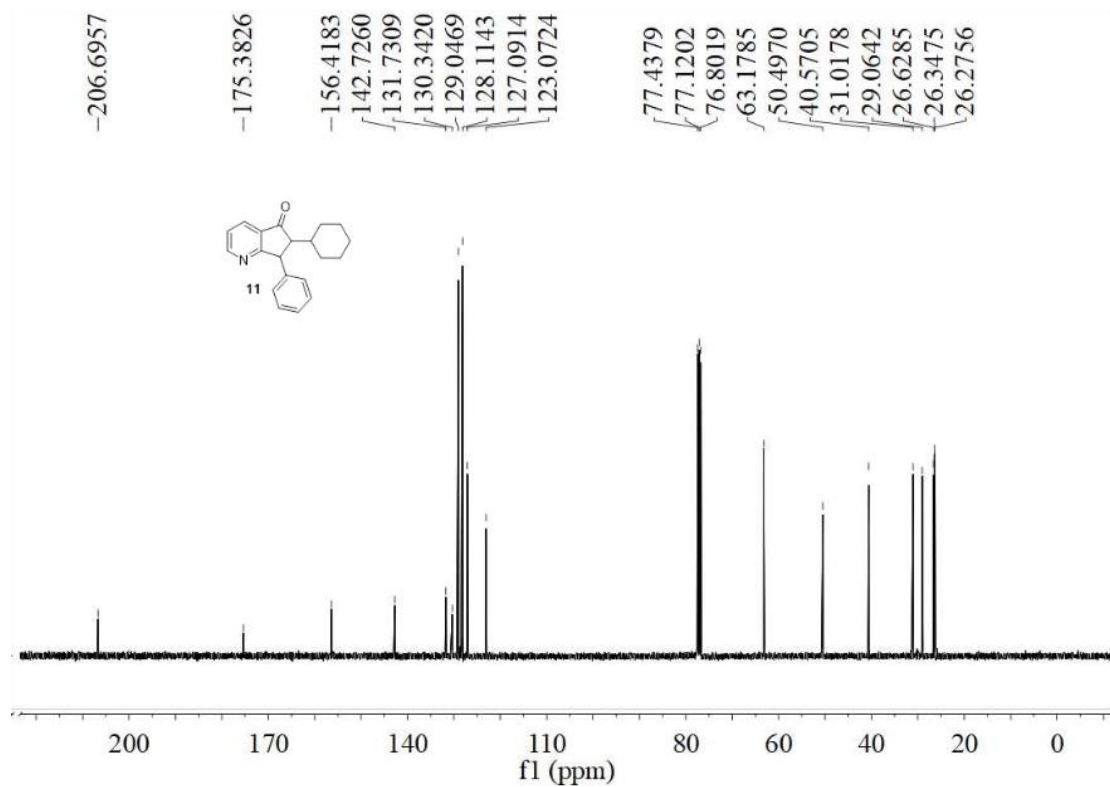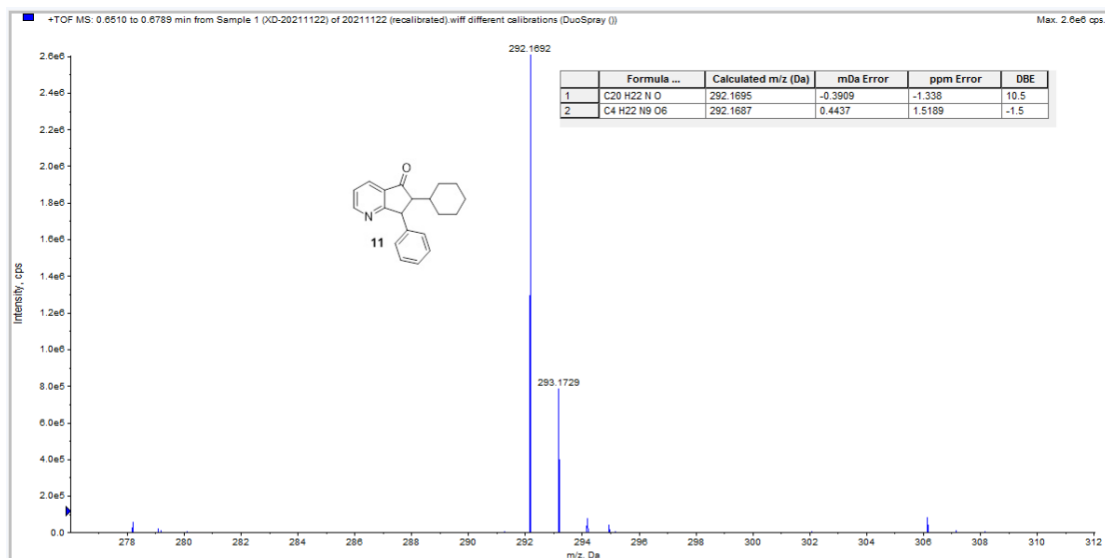

Supplement: d1cc06204b1.pdf [file d1cc06204b1.pdf]
